# Supplementary material
Source: PubMed Central journal article supplement (PMC5417822)

**Figure 1.**

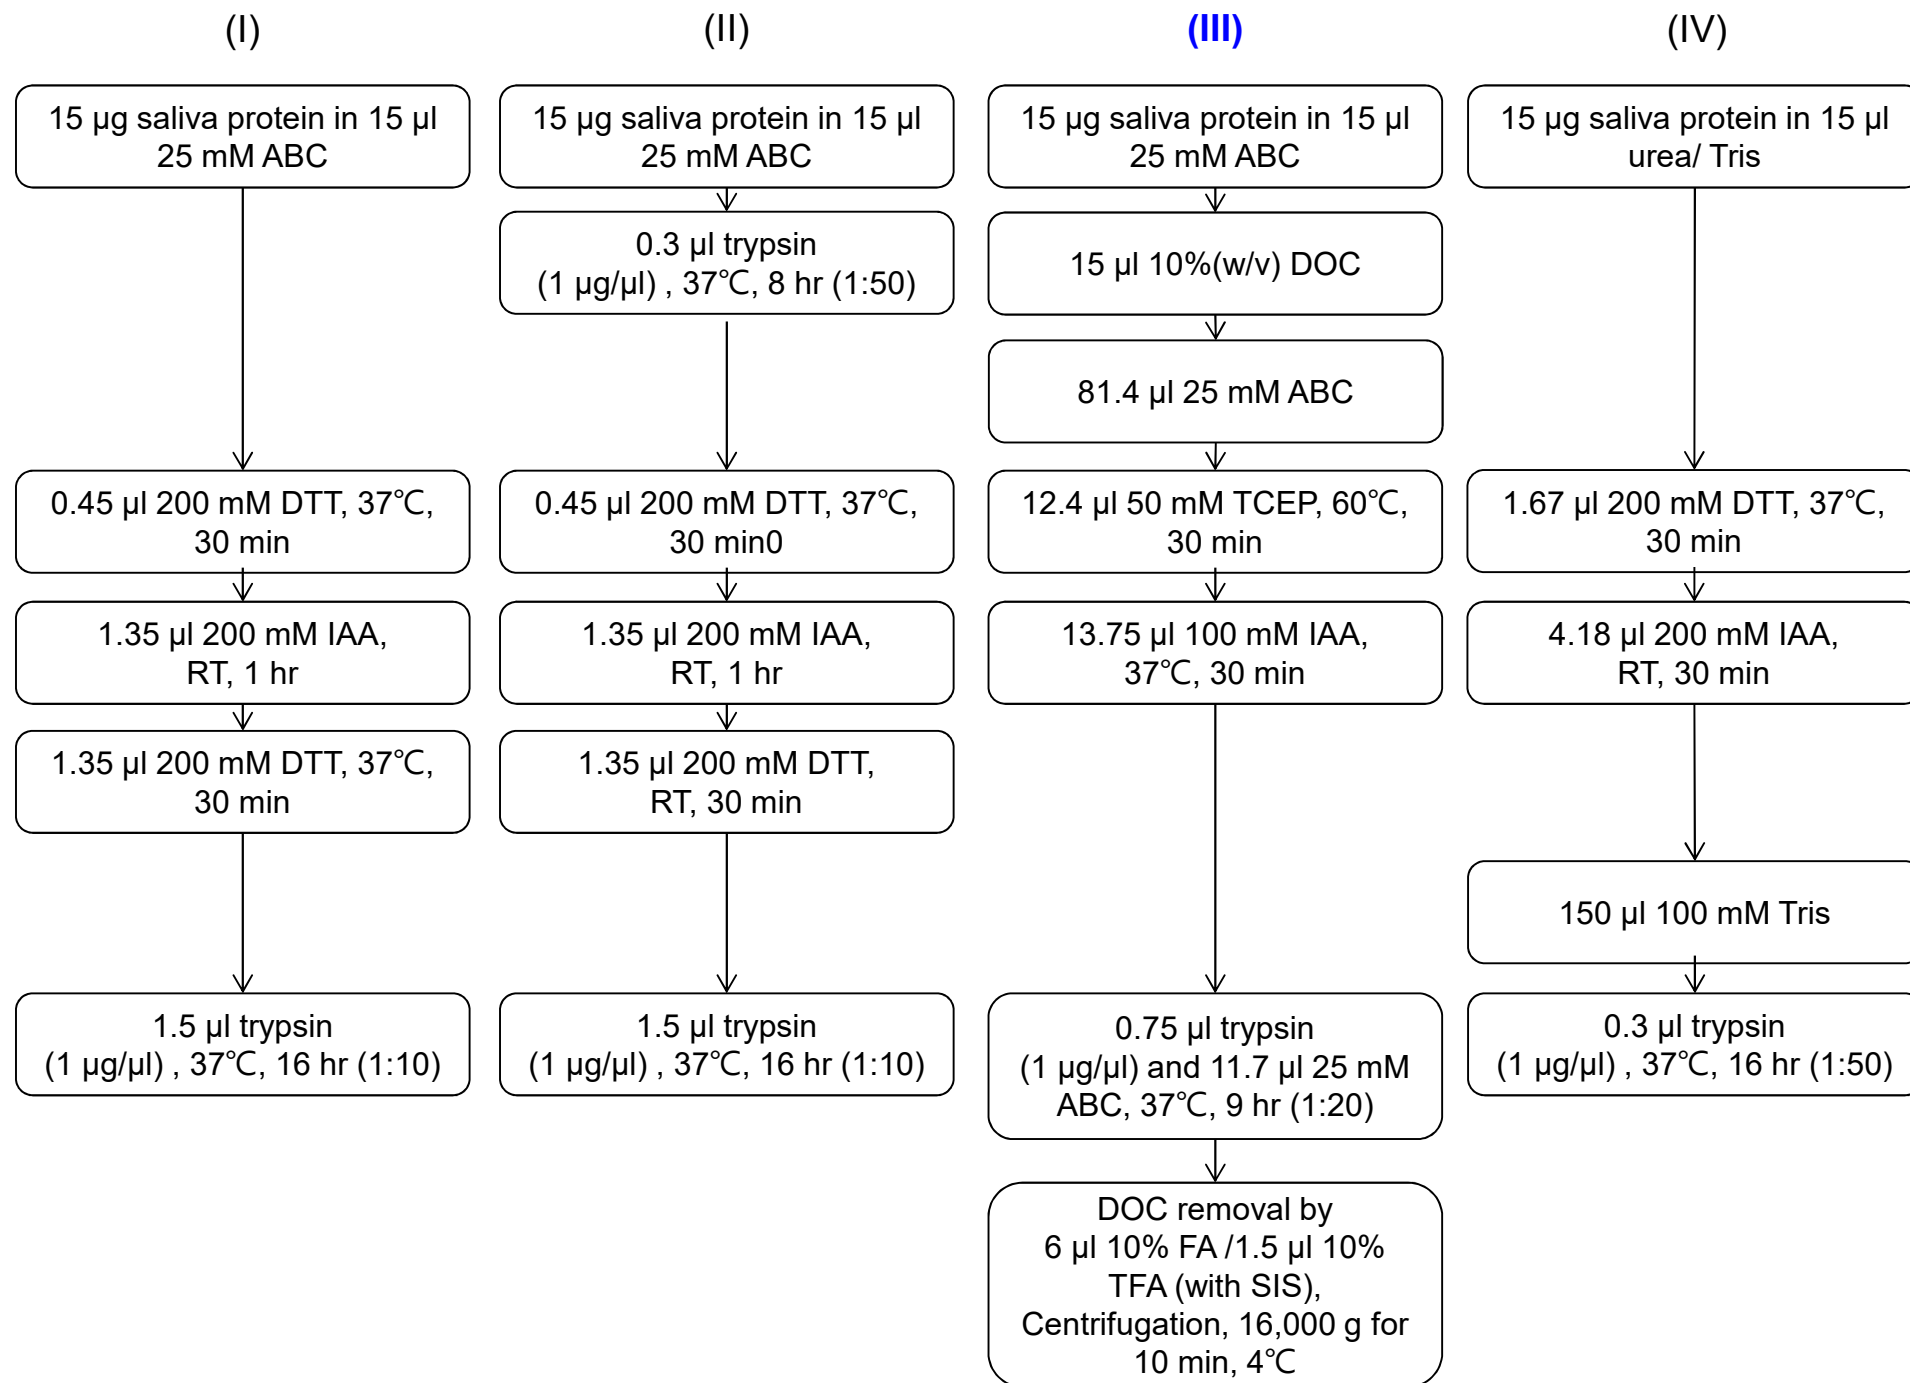

**Figure 2.**

(A)

| Protocol                   | I  |         | II |         | III |         | IV |         |
|----------------------------|----|---------|----|---------|-----|---------|----|---------|
| Best Digestion Protein no. | 2  |         | 8  |         | 32  |         | 14 |         |
| CV(%) under 20             | 17 | (30.4%) | 17 | (30.4%) | 39  | (69.6%) | 22 | (39.3%) |
| CV(%) under 30             | 24 | (42.9%) | 22 | (39.3%) | 43  | (76.8%) | 37 | (66.1%) |
| Detectable Protein no.     | 53 |         | 54 |         | 54  |         | 52 |         |
| Total Protein no.          | 56 |         |    |         |     |         |    |         |

  

| Hydrophobicity index |       |       |       |       |  |  |
|----------------------|-------|-------|-------|-------|--|--|
| Average              | -1.19 | -0.67 | -0.35 | -0.26 |  |  |
| SD                   | 0.38  | 0.35  | 0.51  | 0.76  |  |  |
| Median               | -1.19 | -0.56 | -0.34 | -0.43 |  |  |

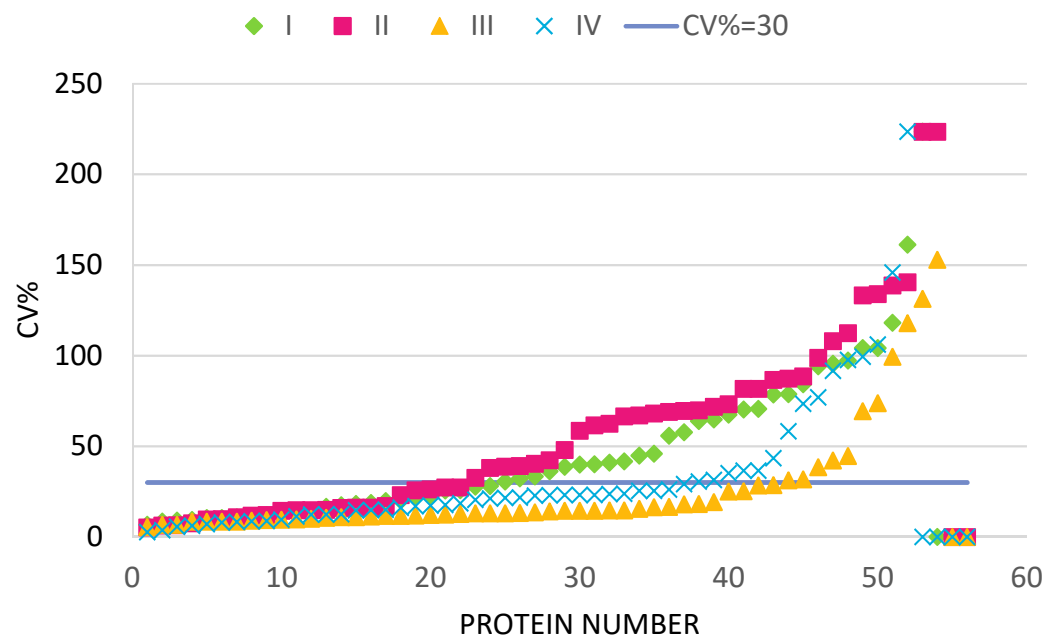

Figure 2.

(B)

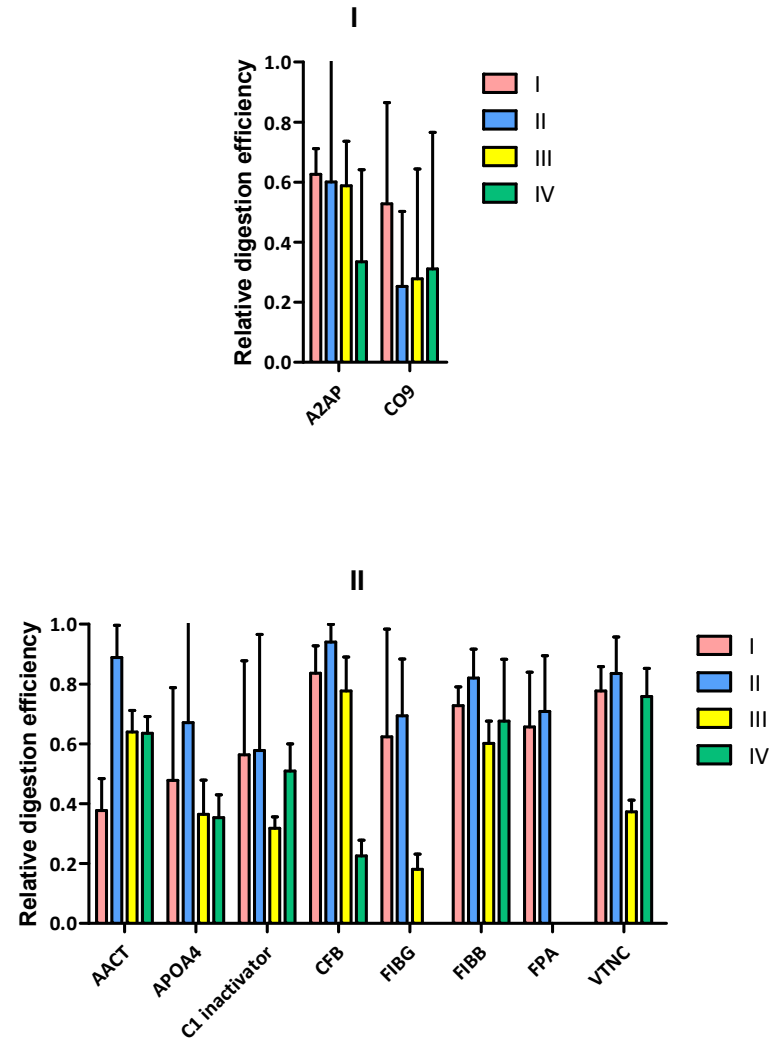

Figure 2.

(C)

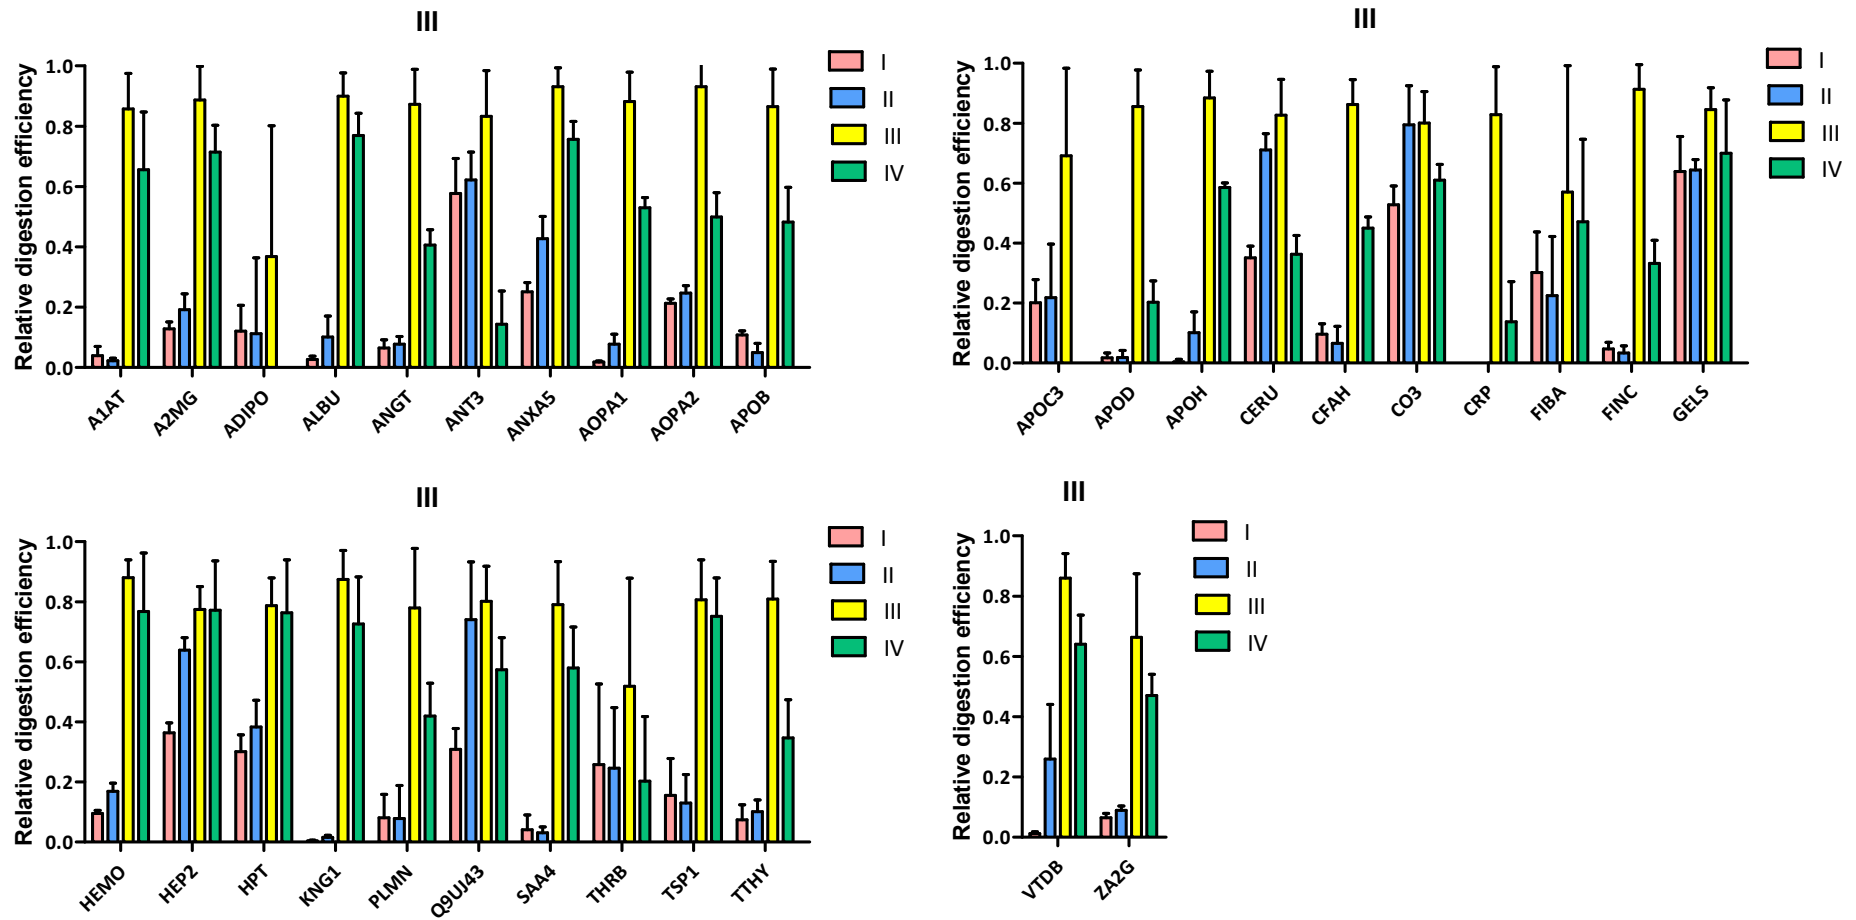

Figure 2.

(D)

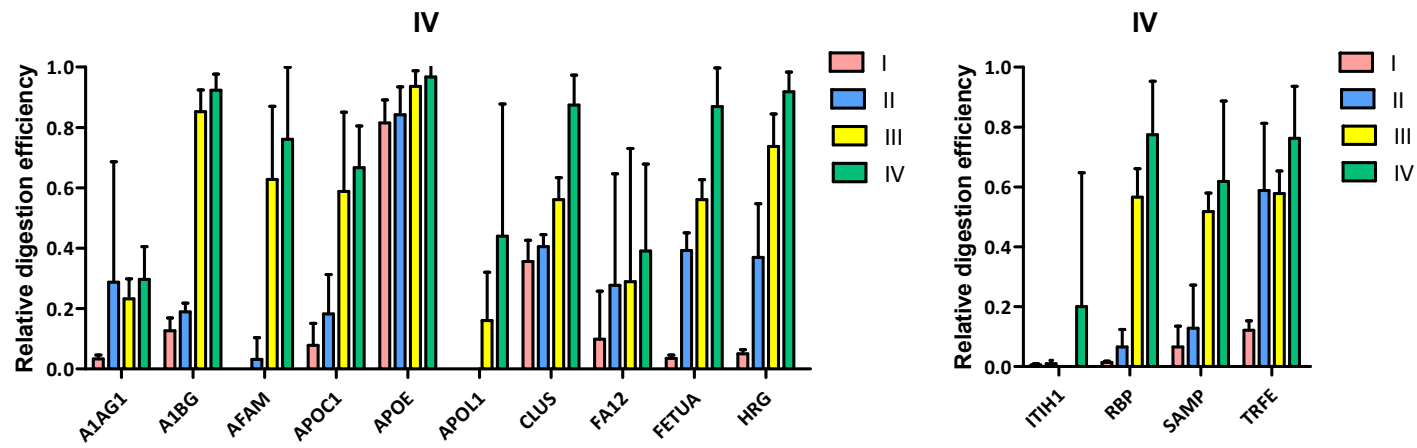

Figure 3(A)

### Sensitivity

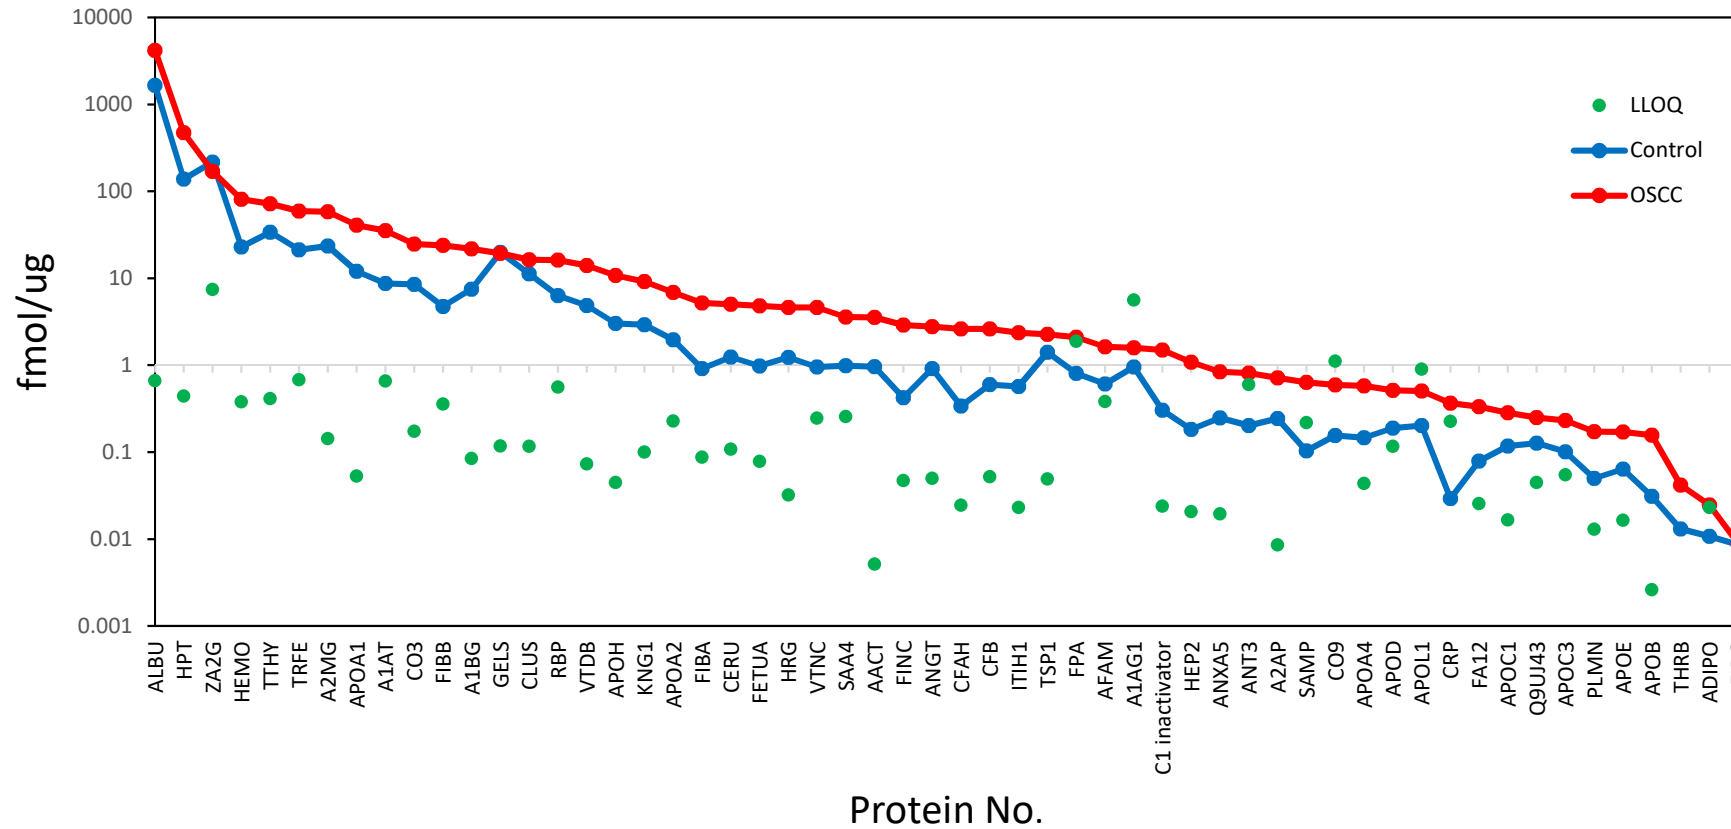

Figure 3(B)

Control (N=58)

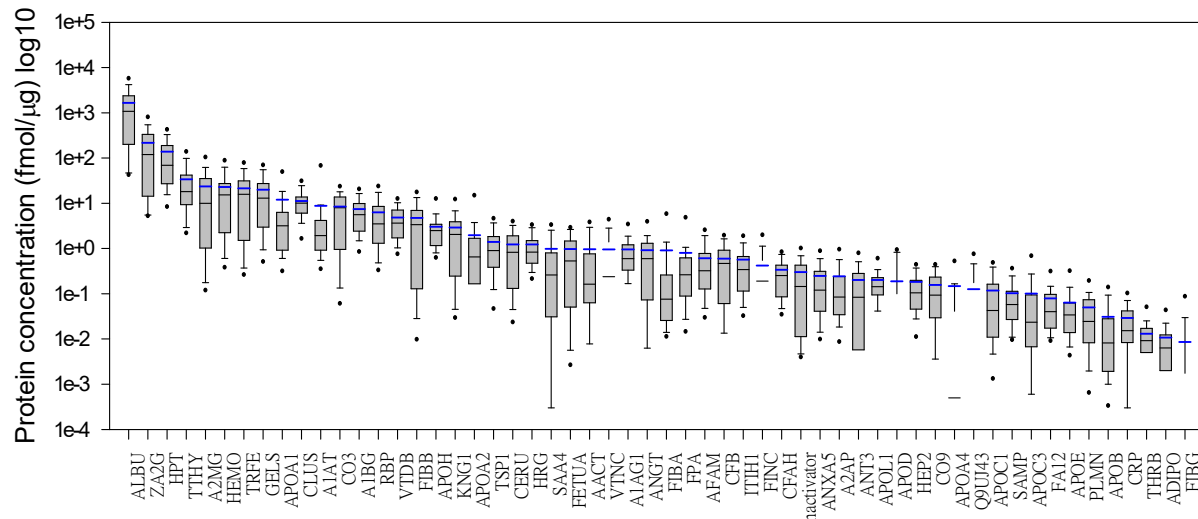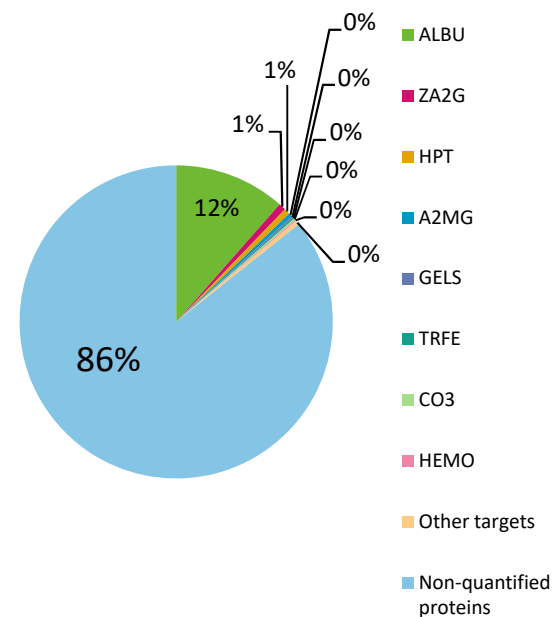

OSCC (N=61)

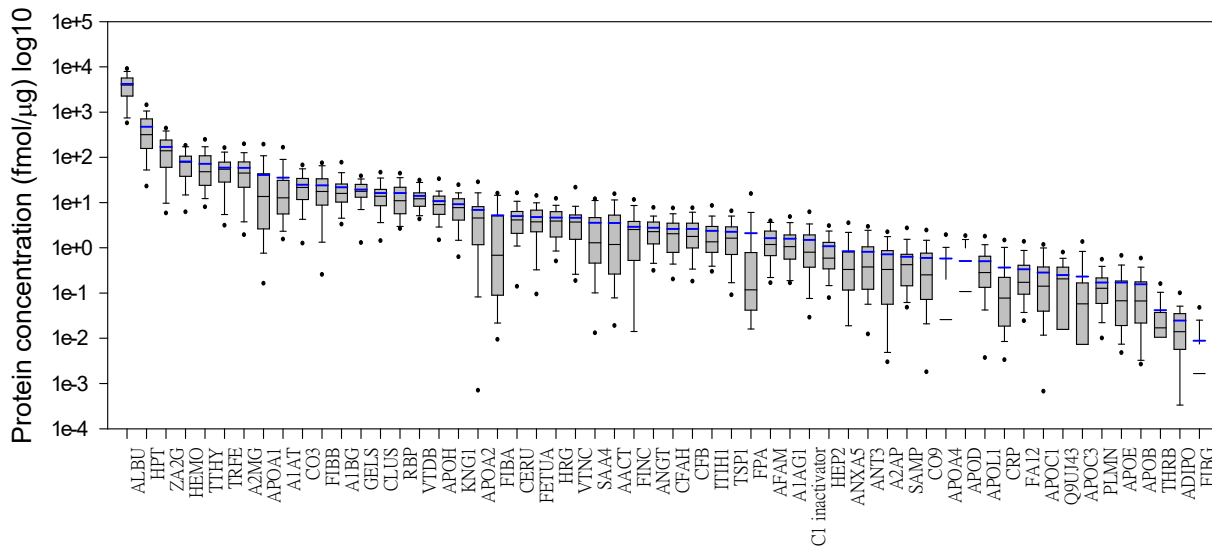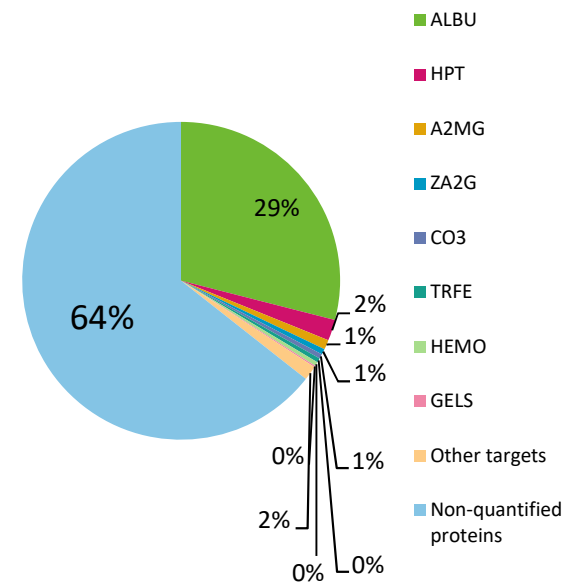

Figure 3(C)

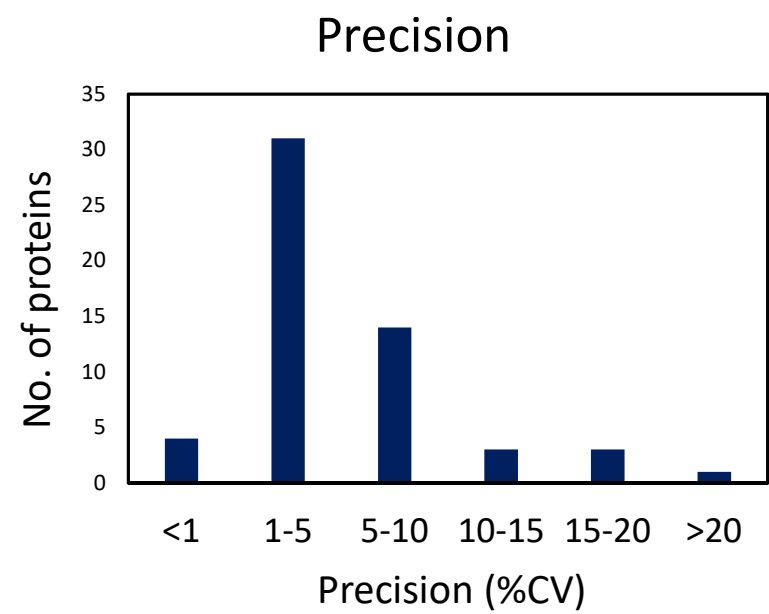



Figure 4(A)

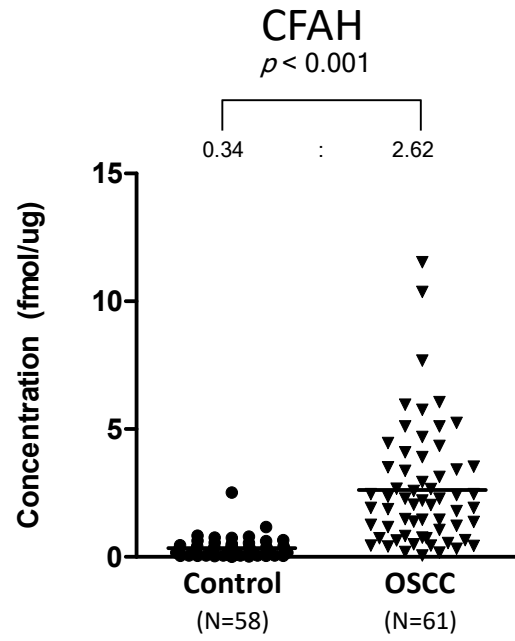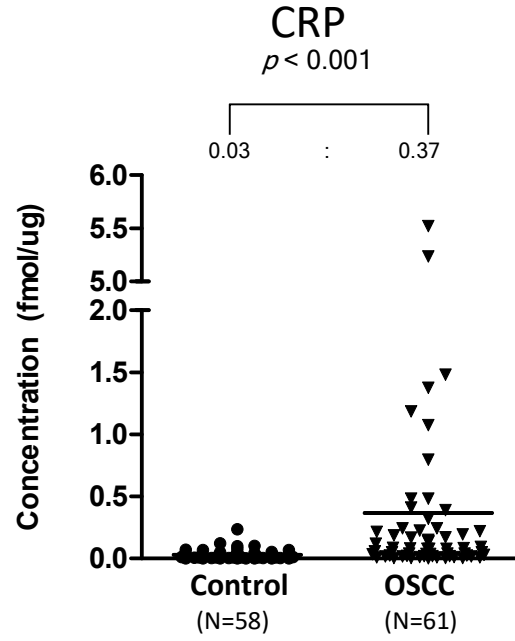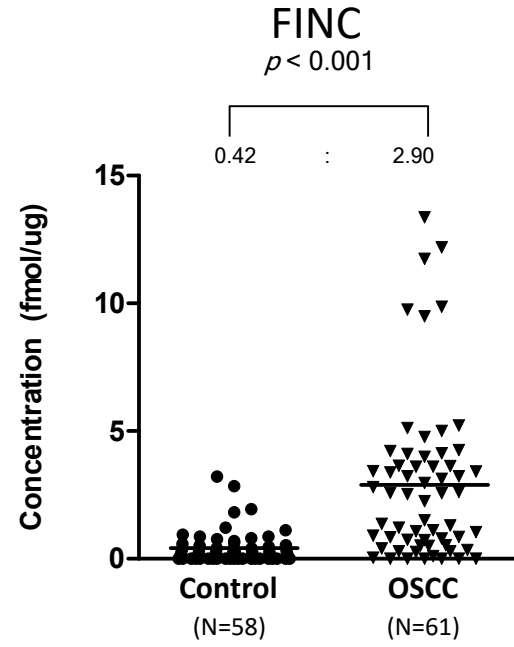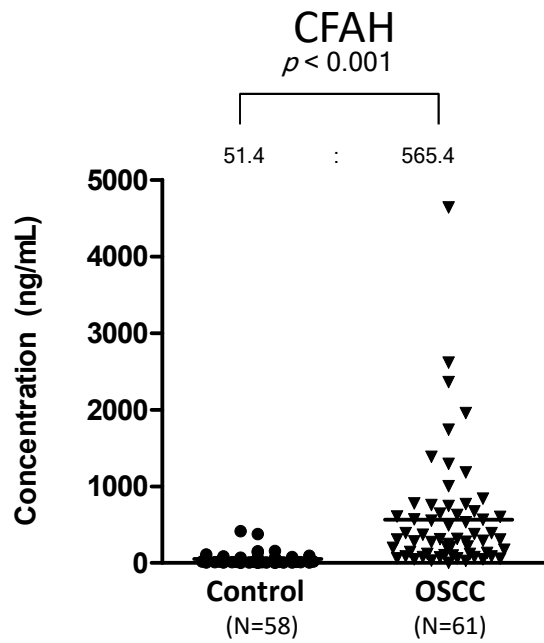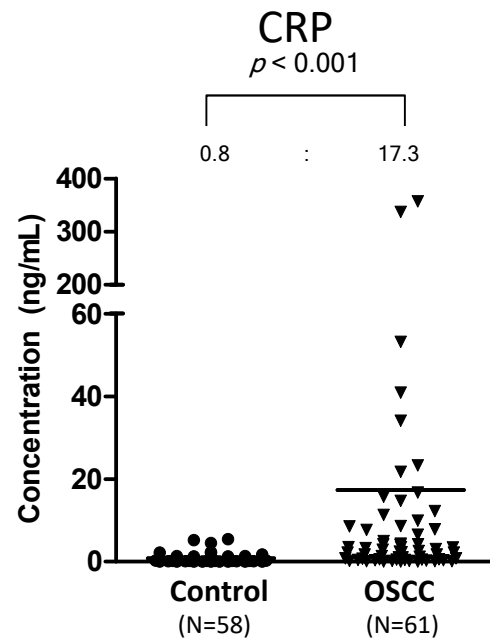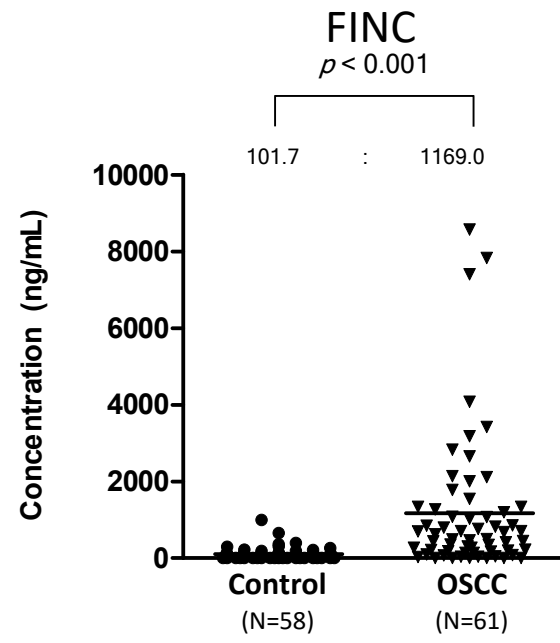

Figure 4(B)

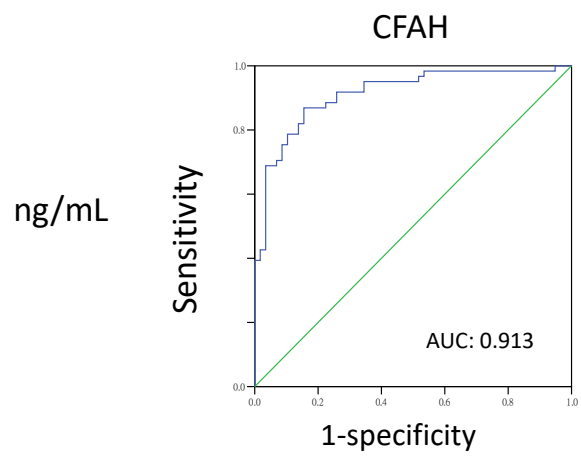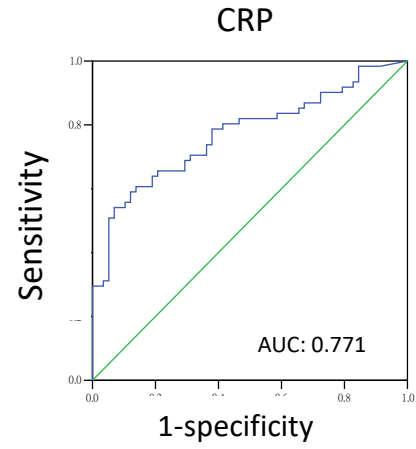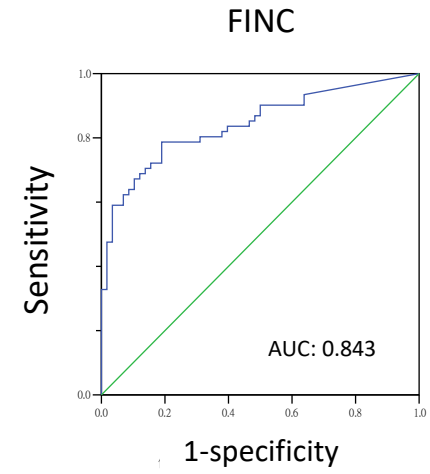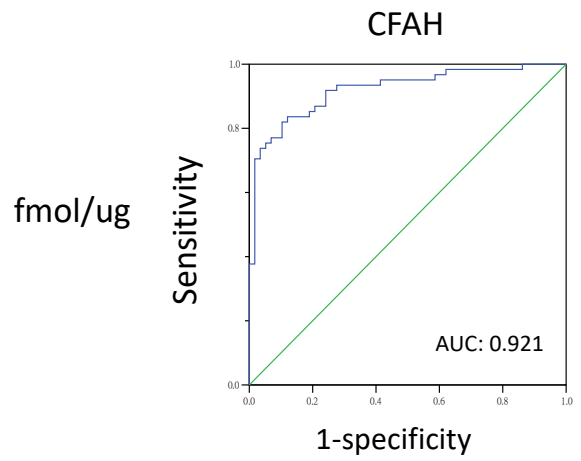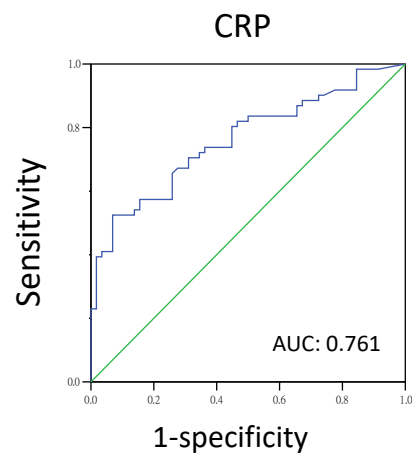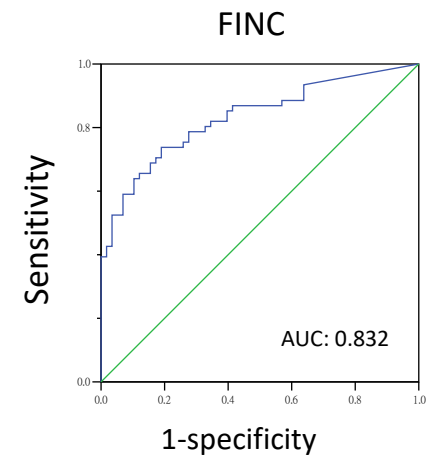

Figure 4(C)

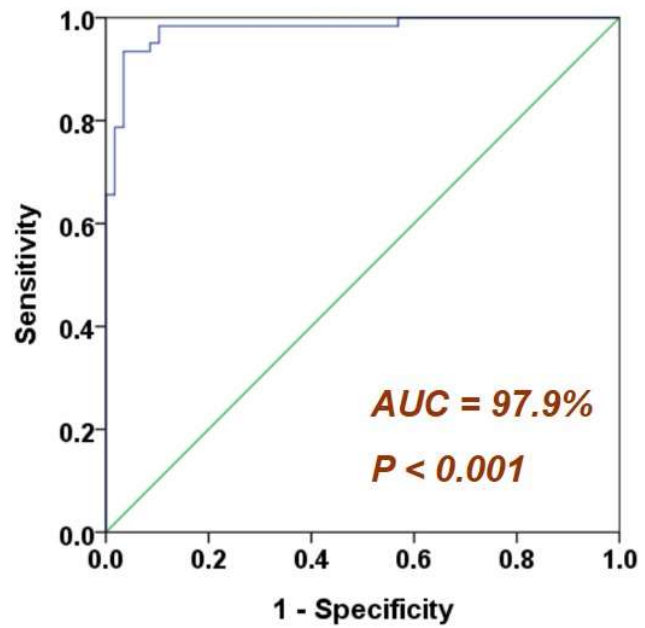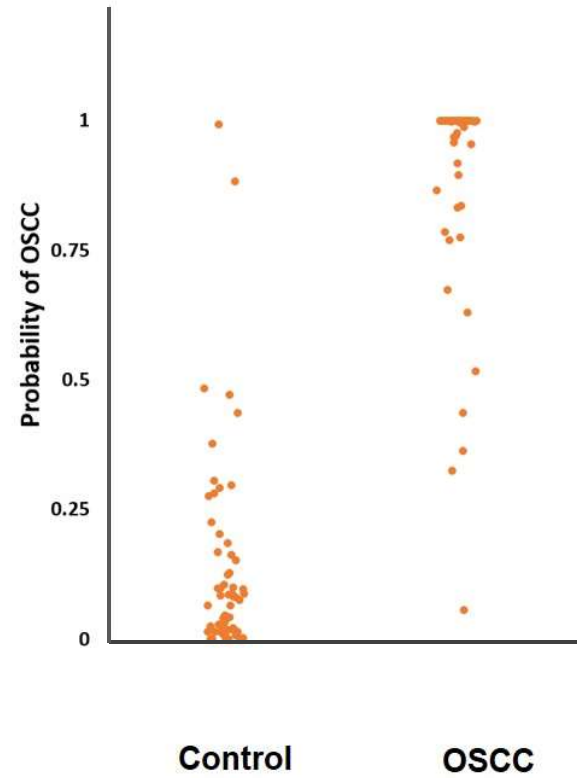



# Supplemental Figure S1C

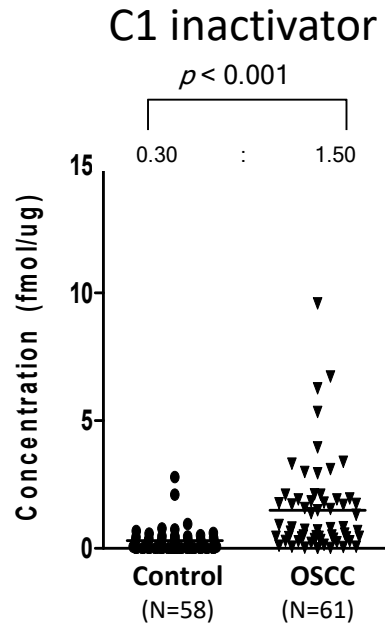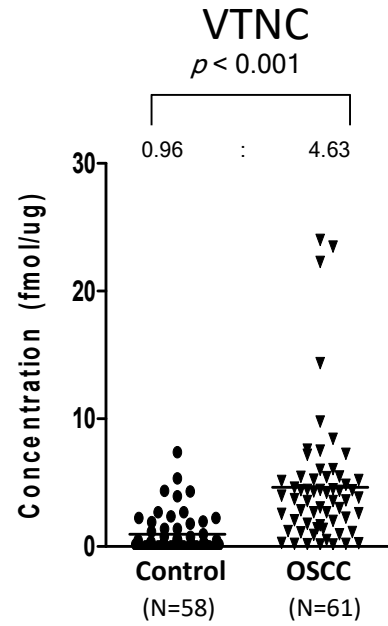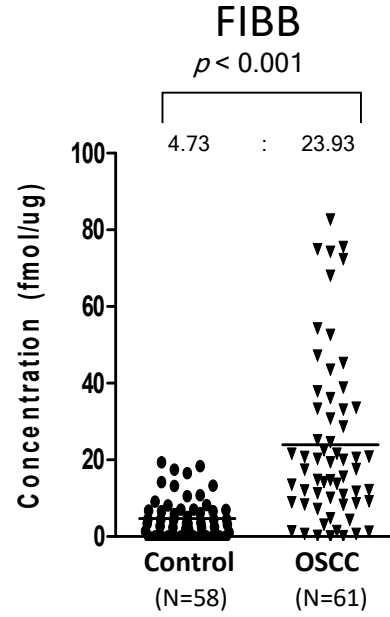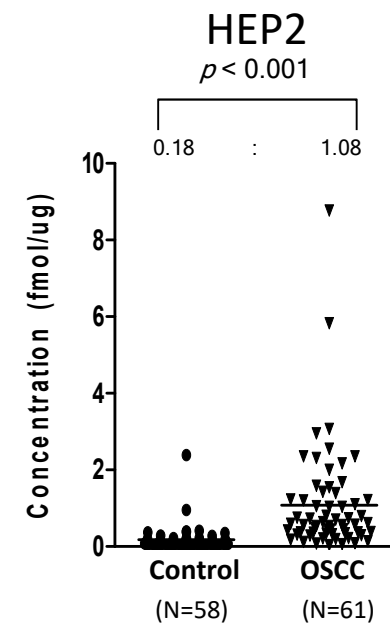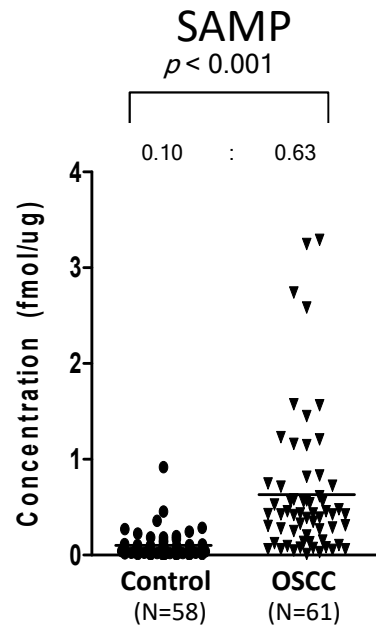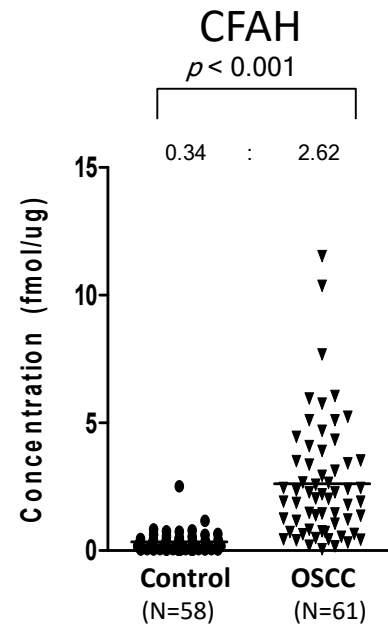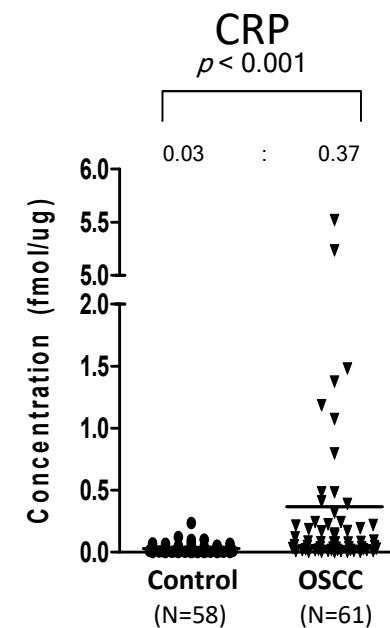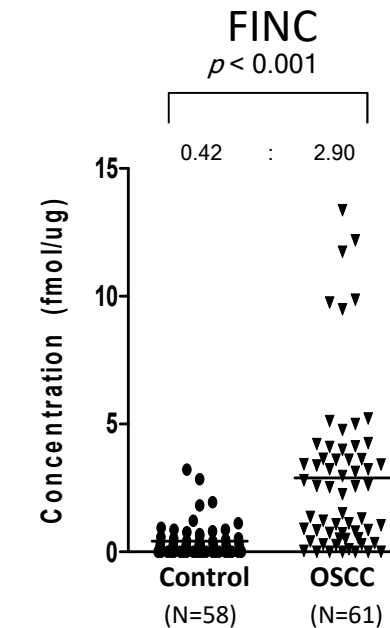

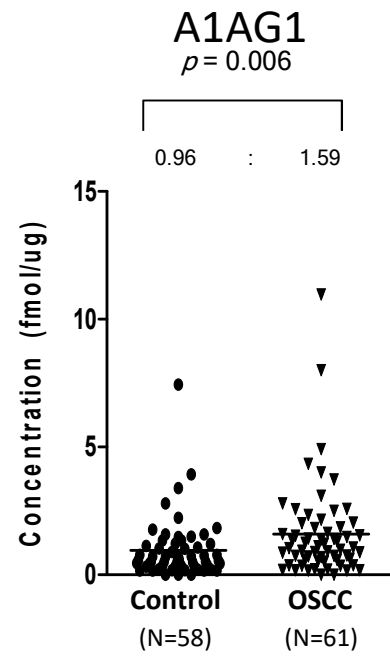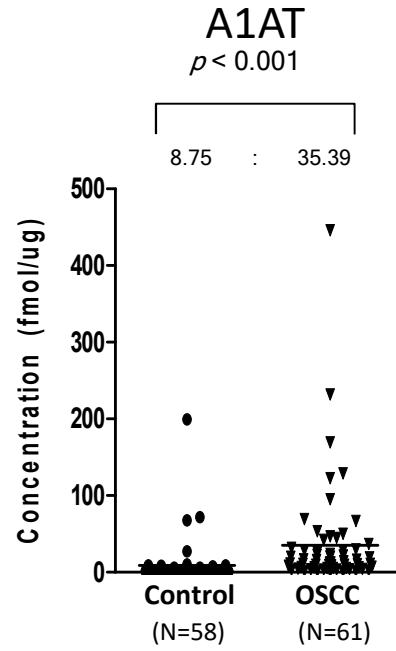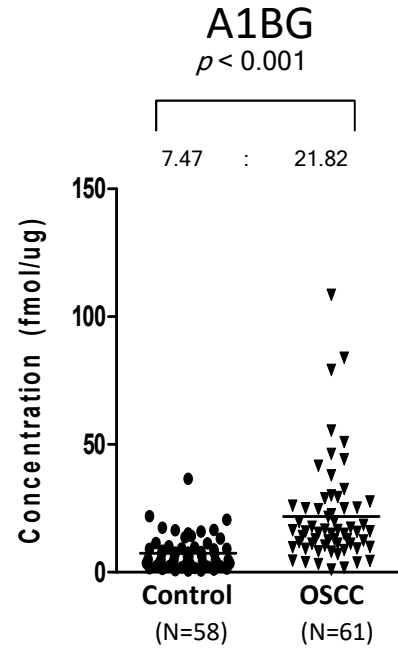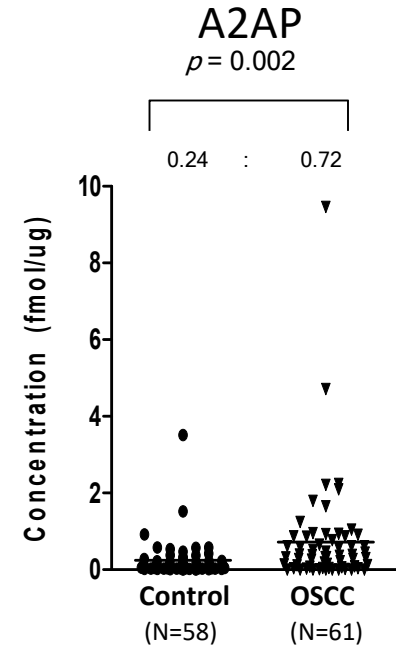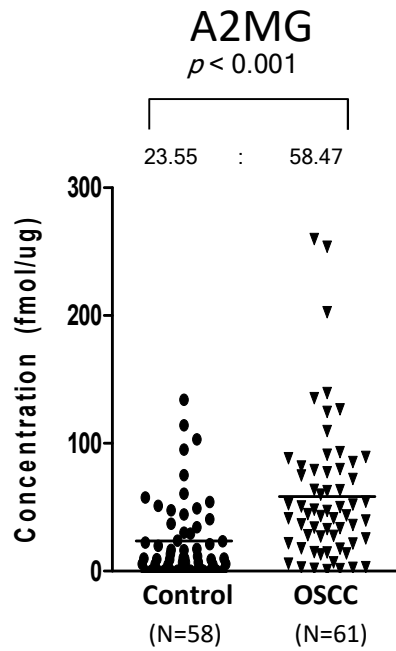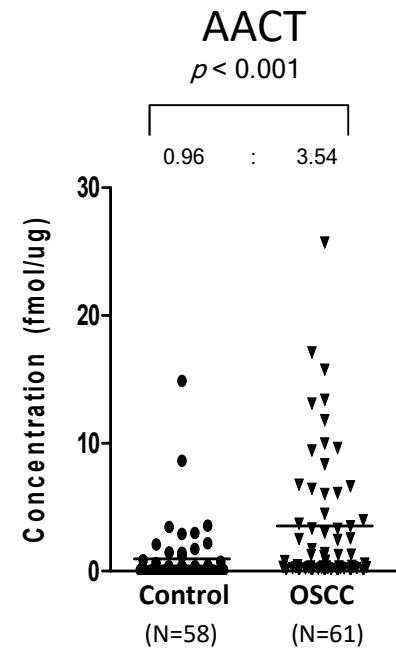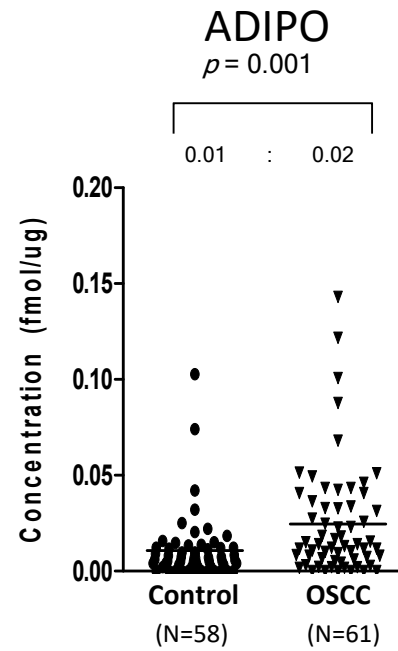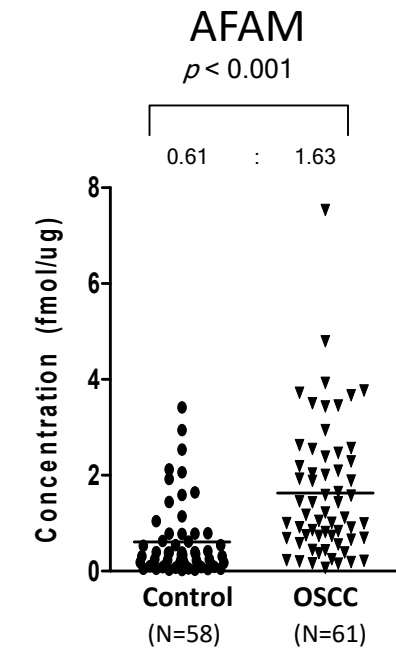

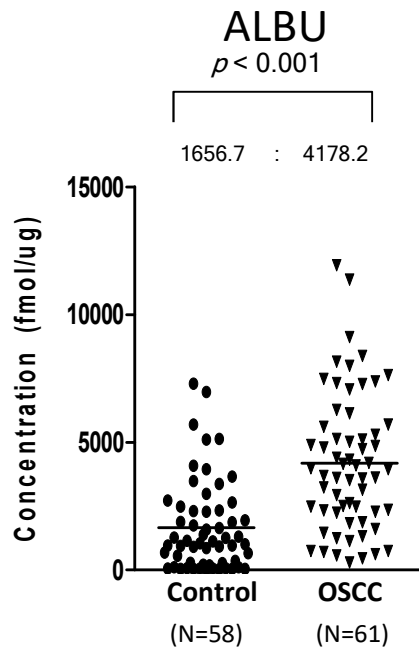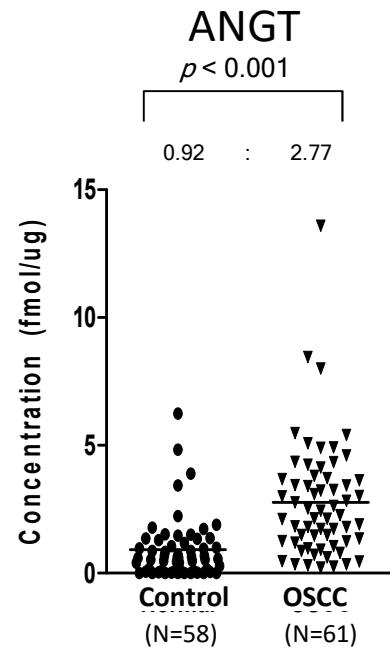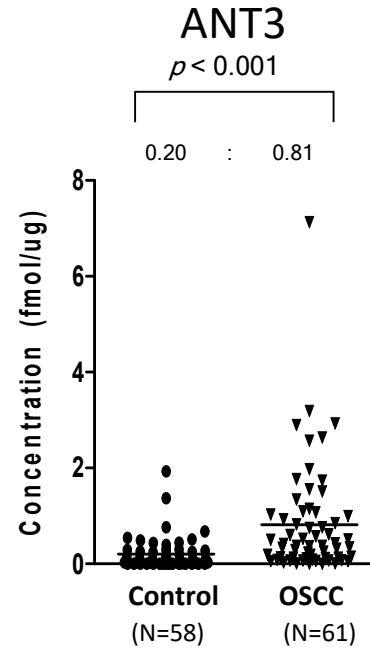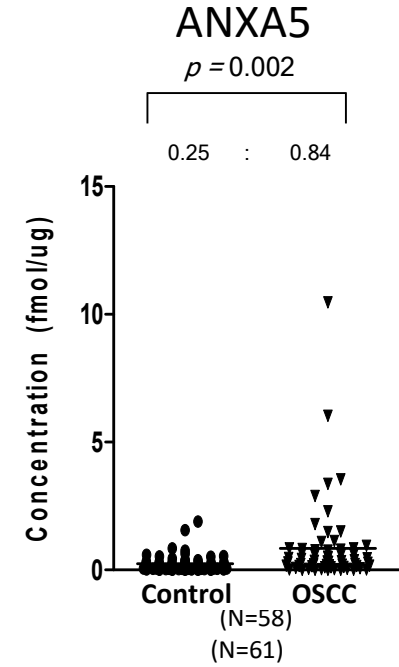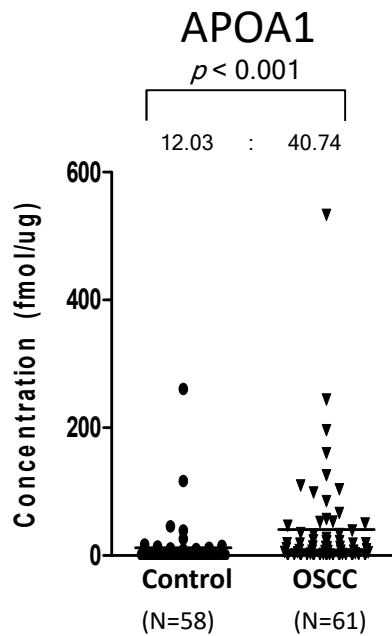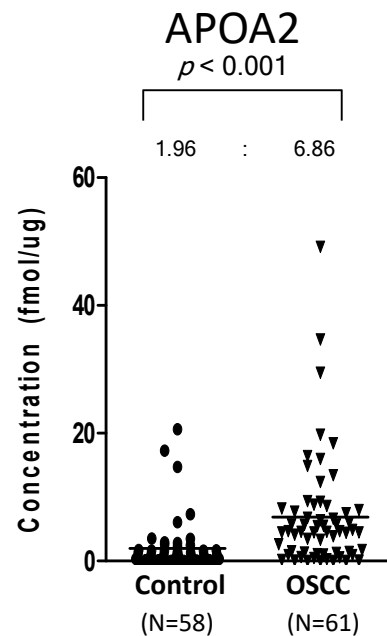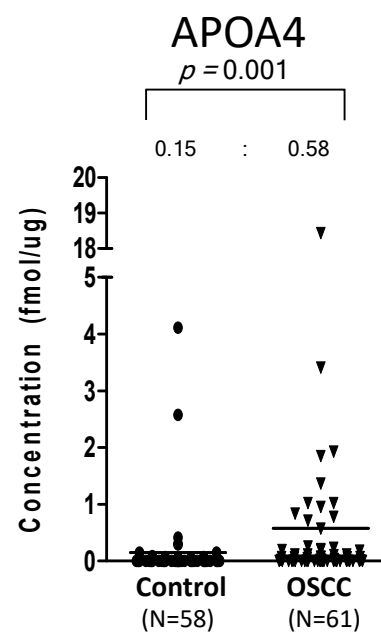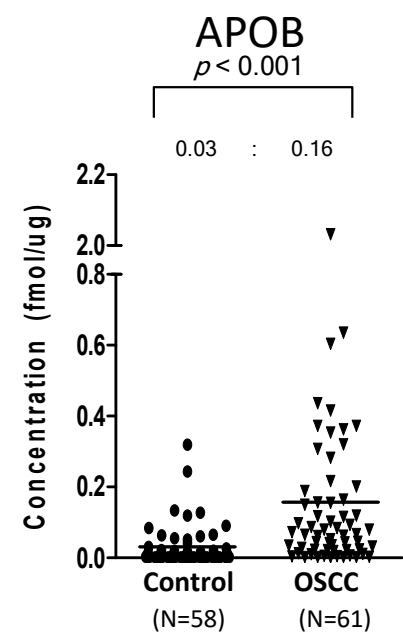

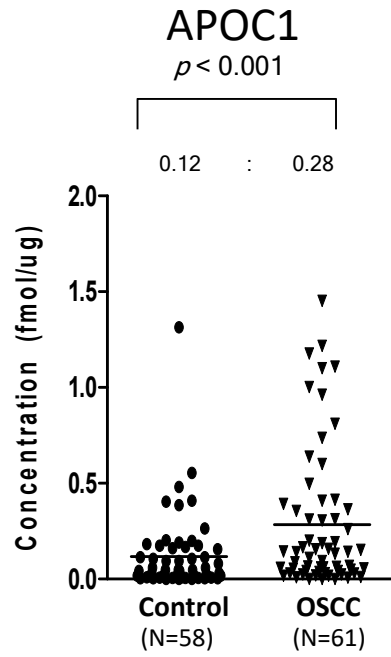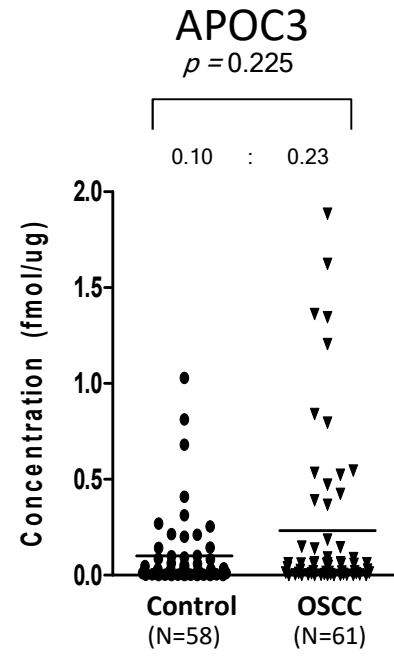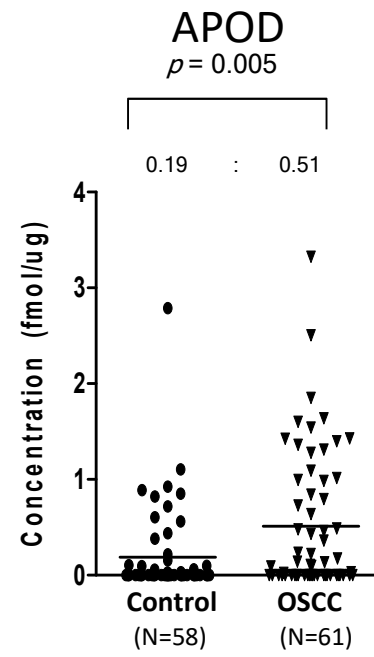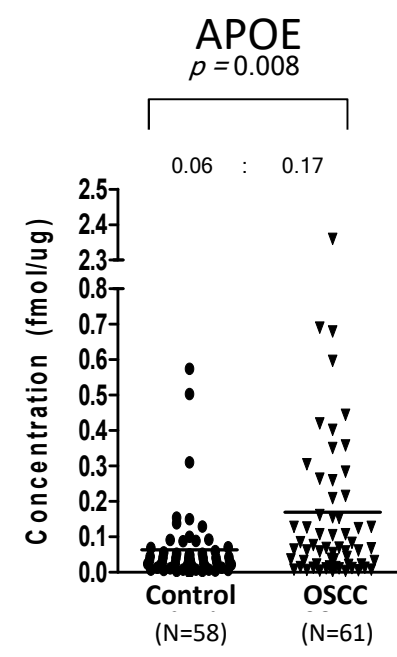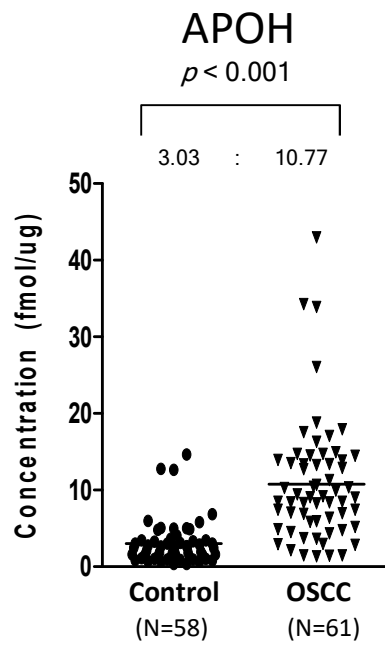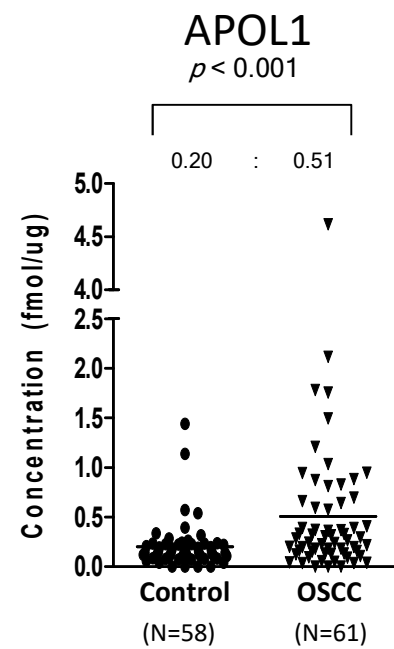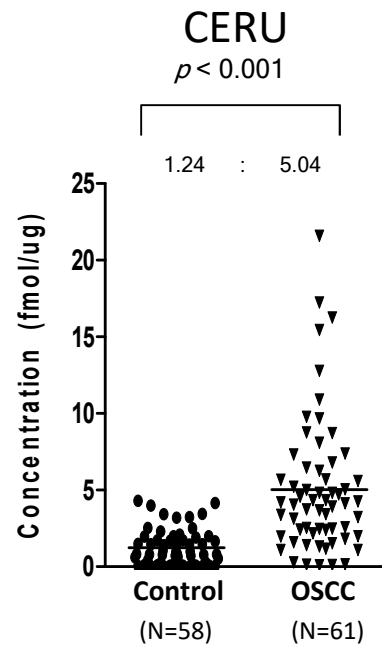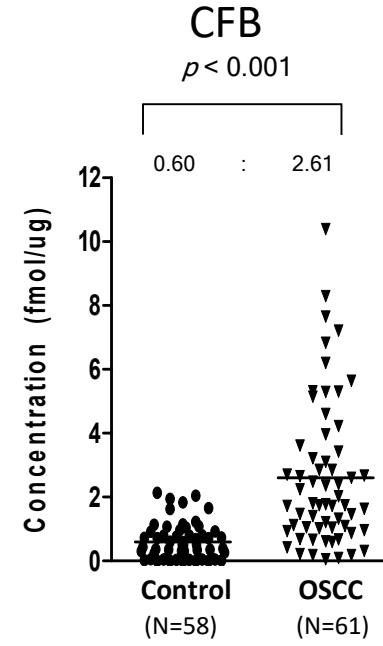



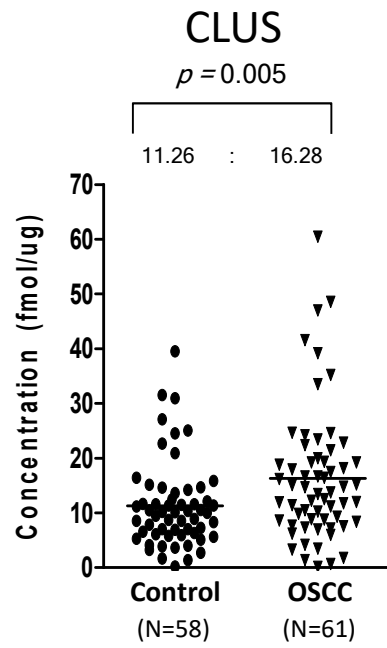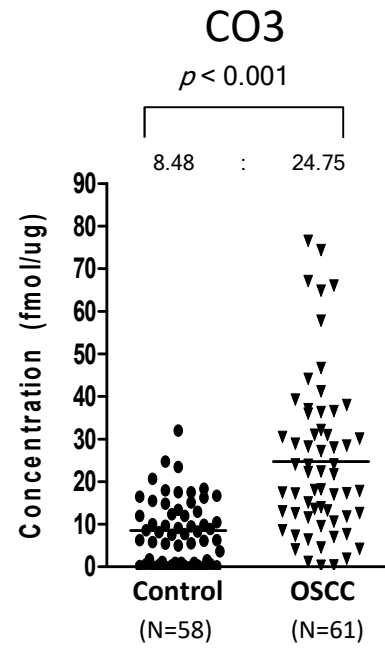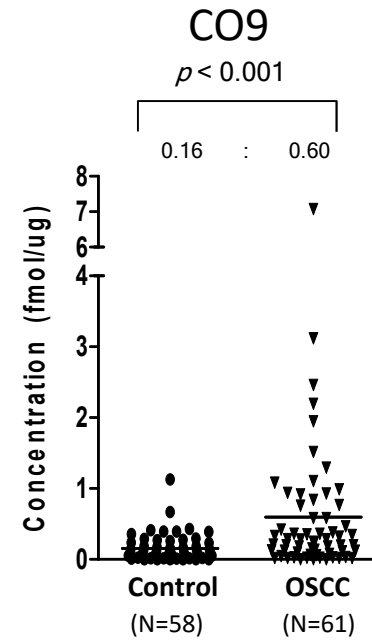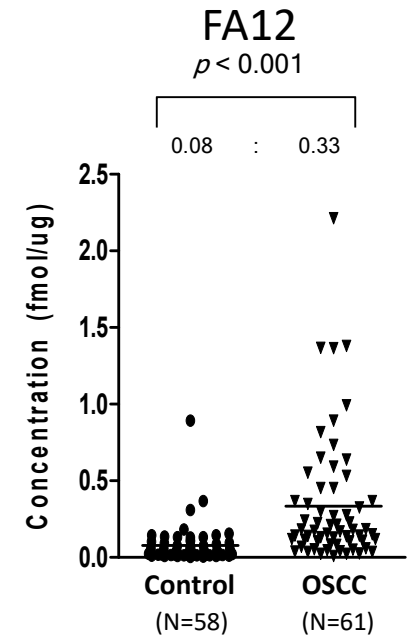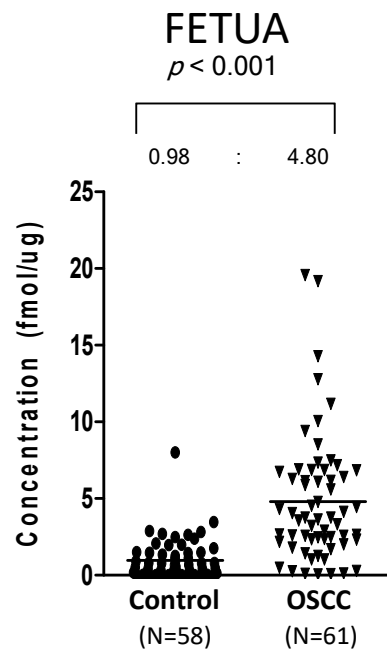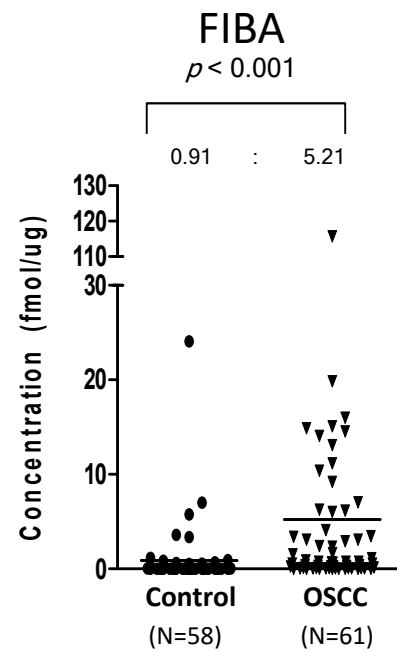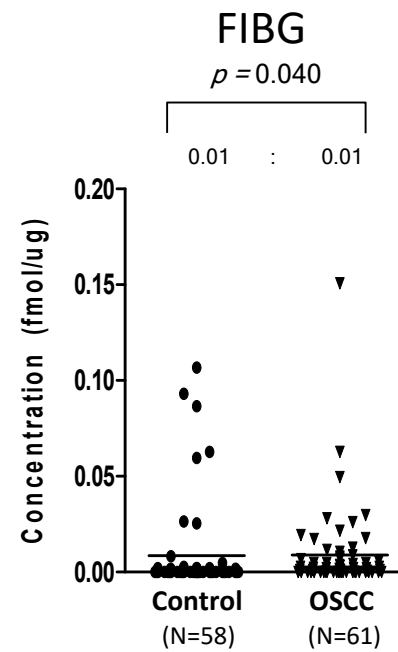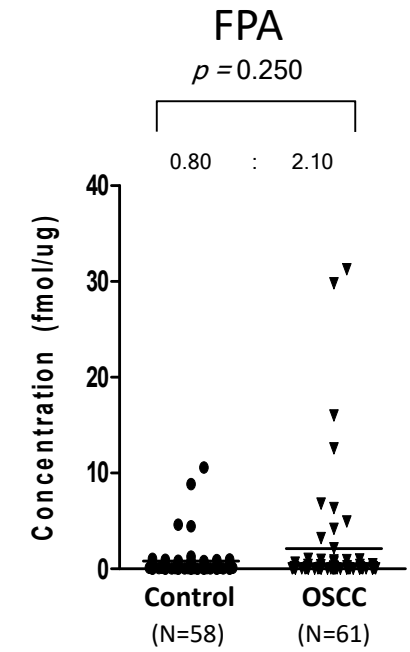

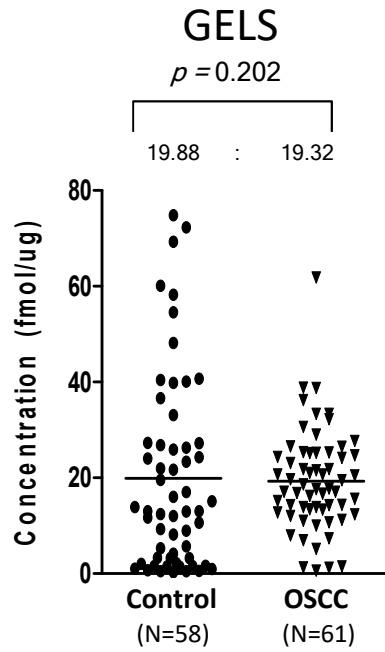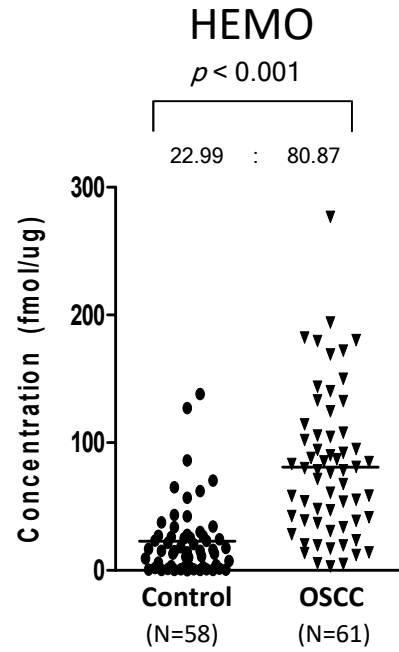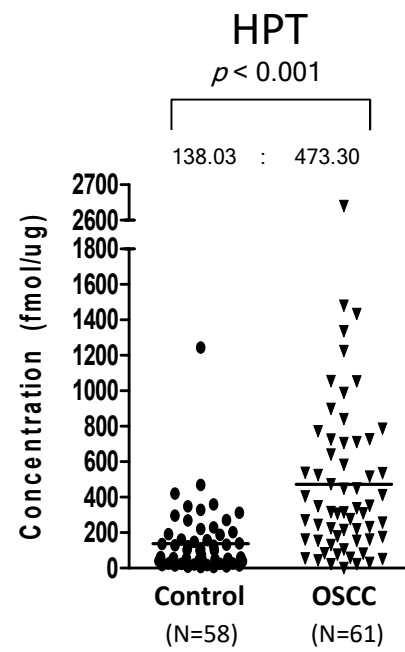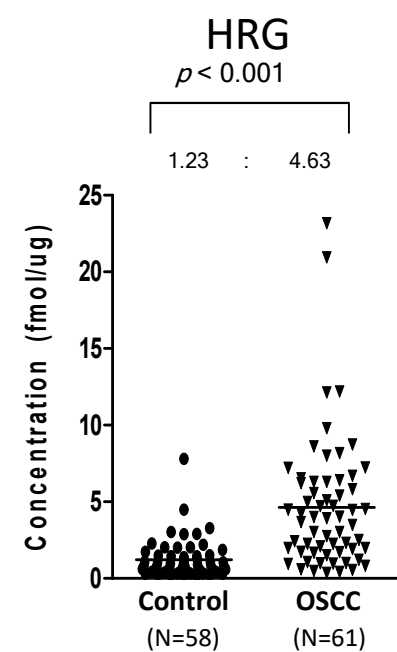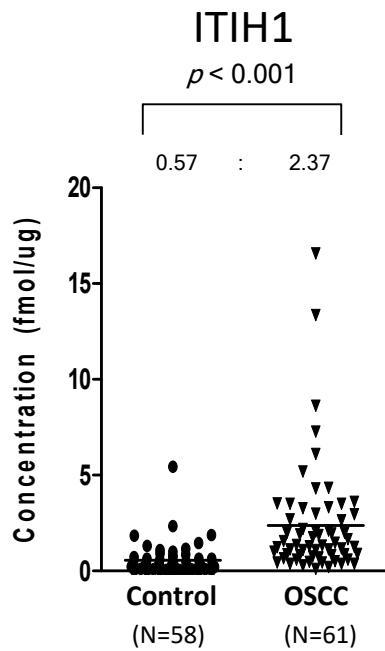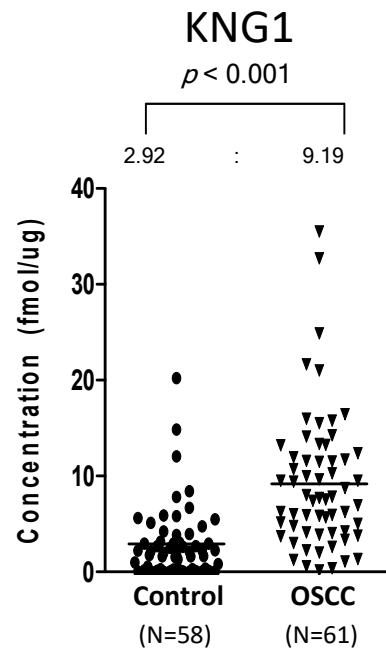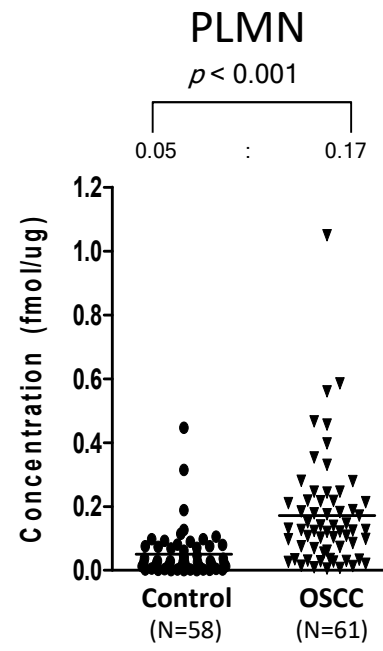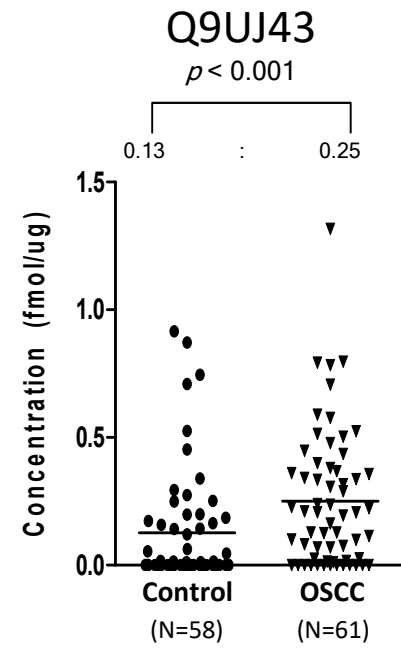

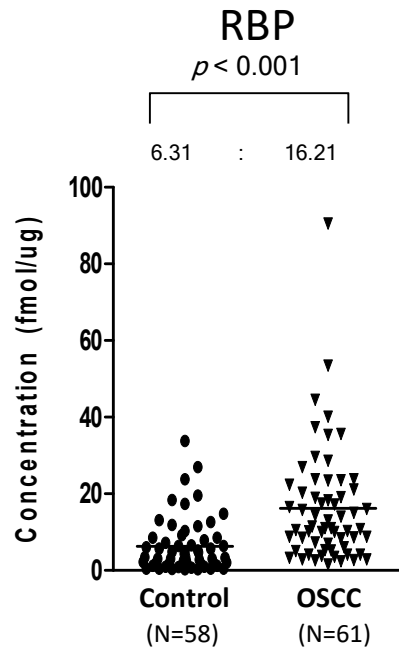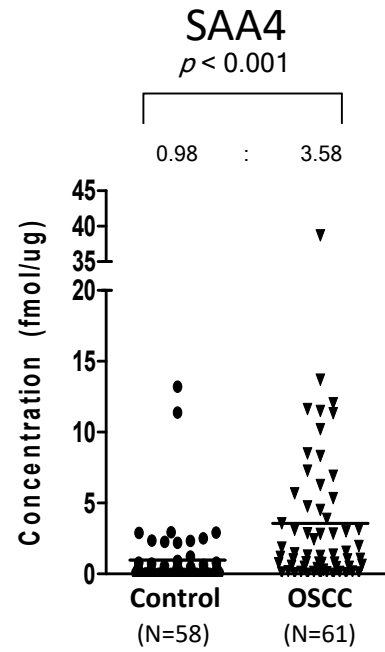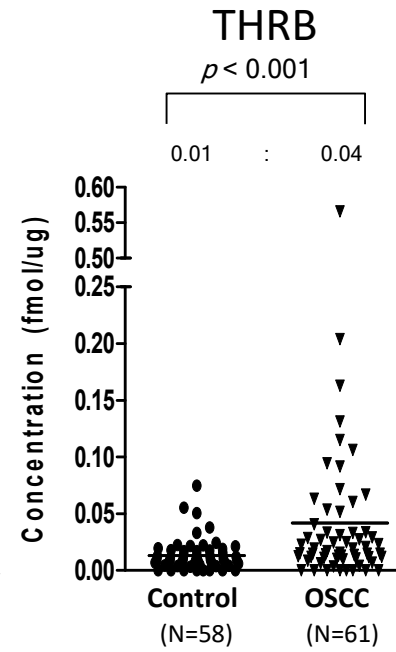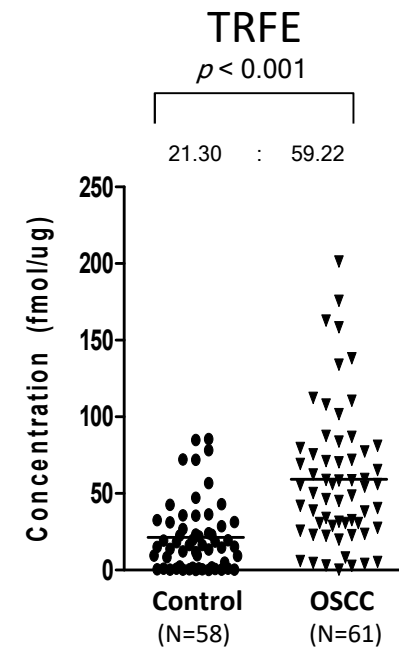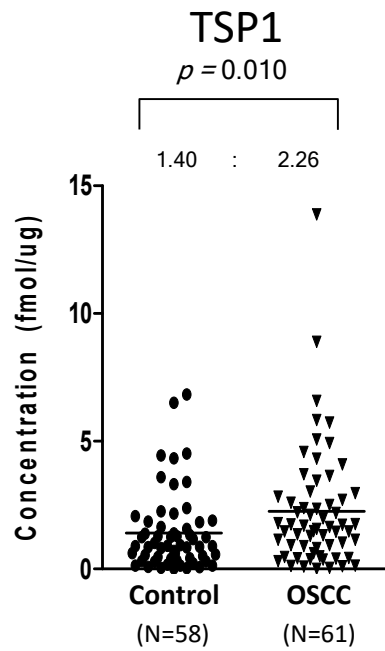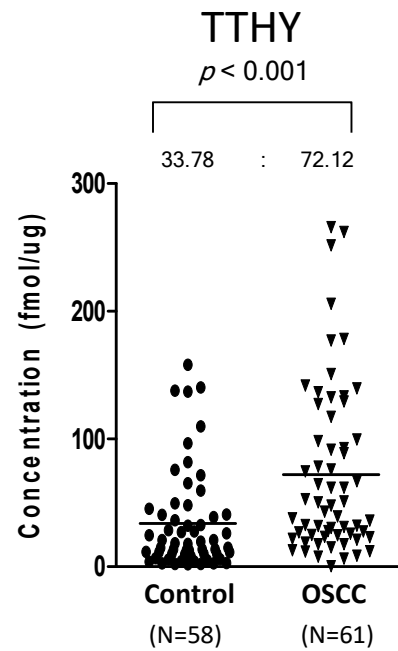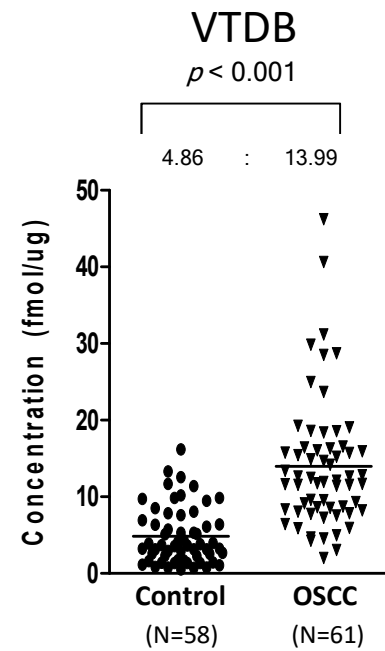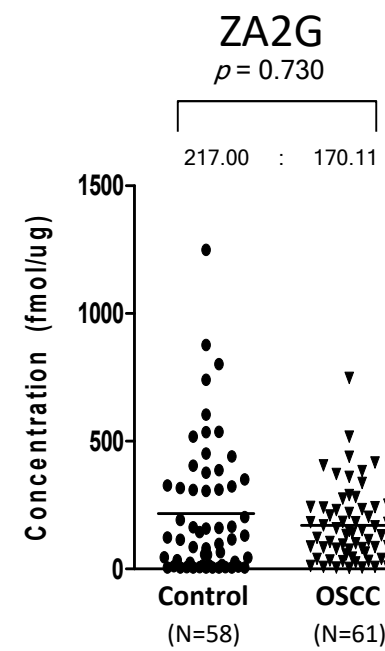

# Supplemental Figure S1D

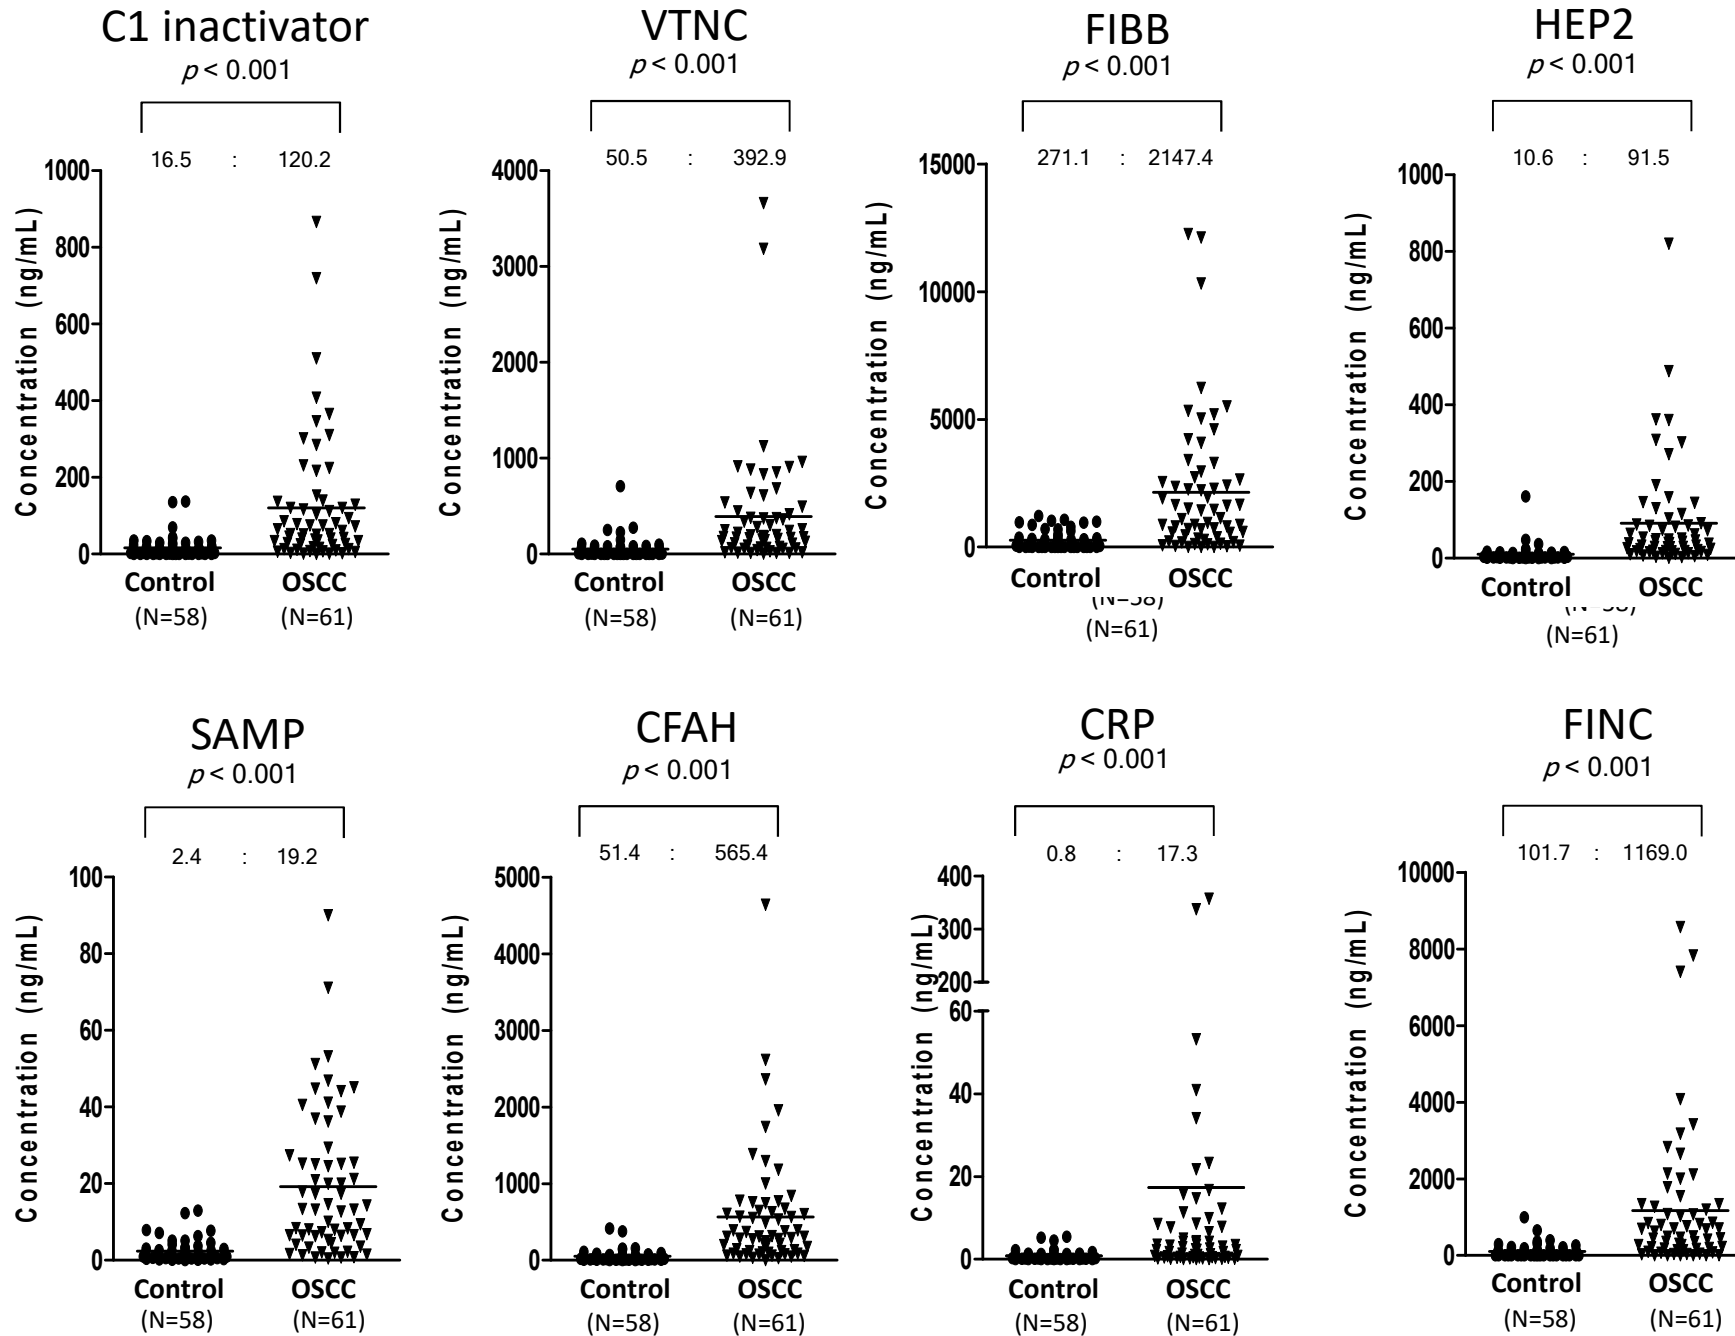

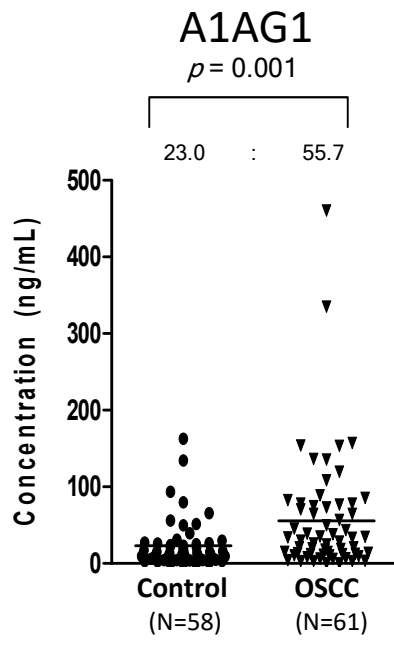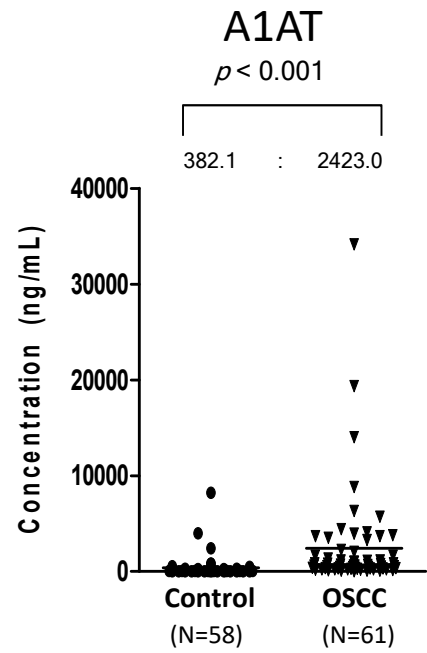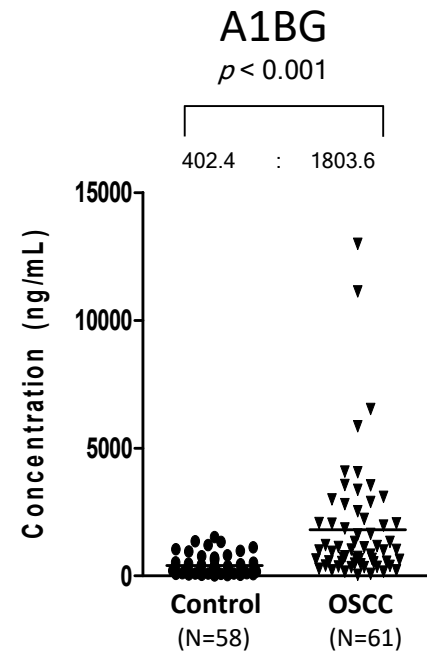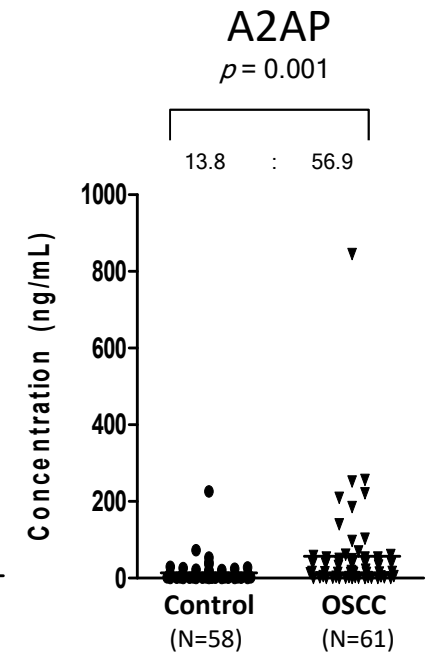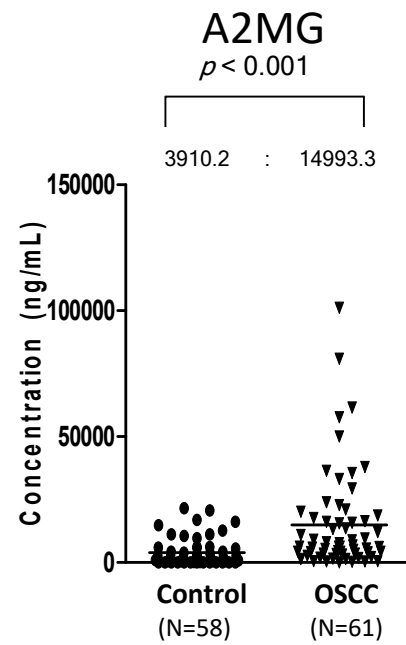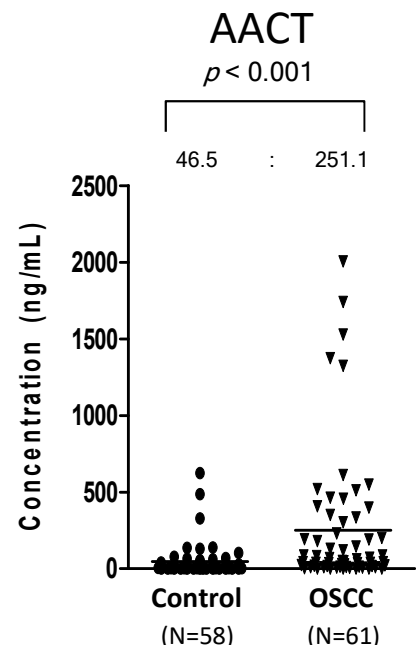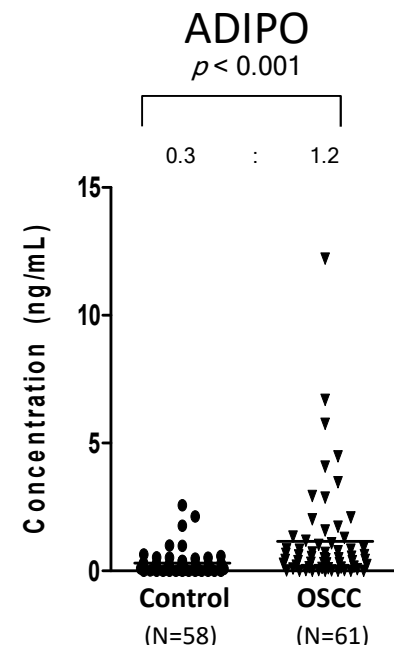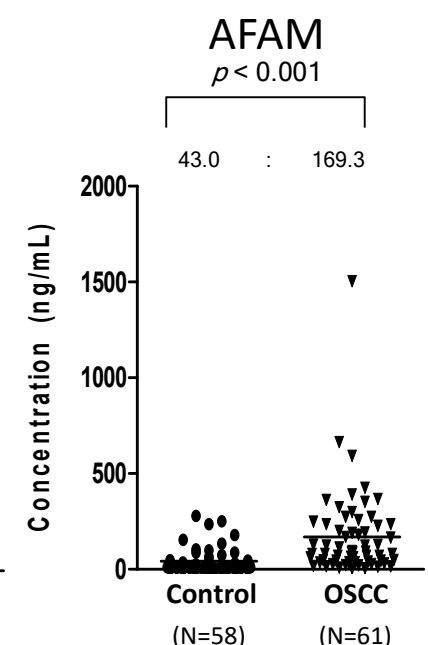

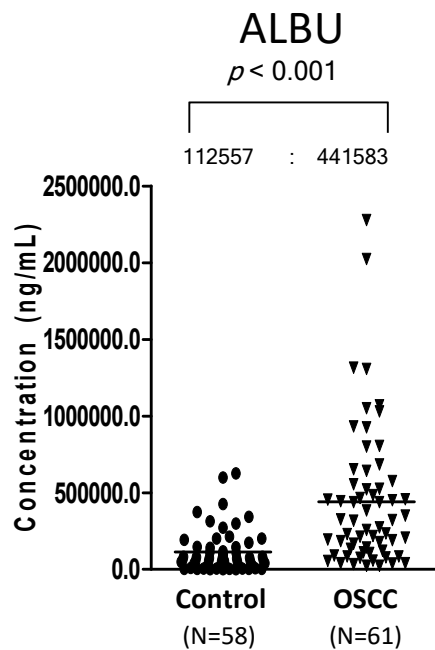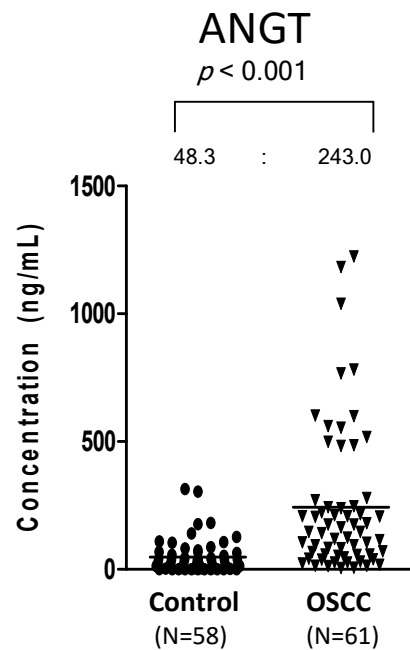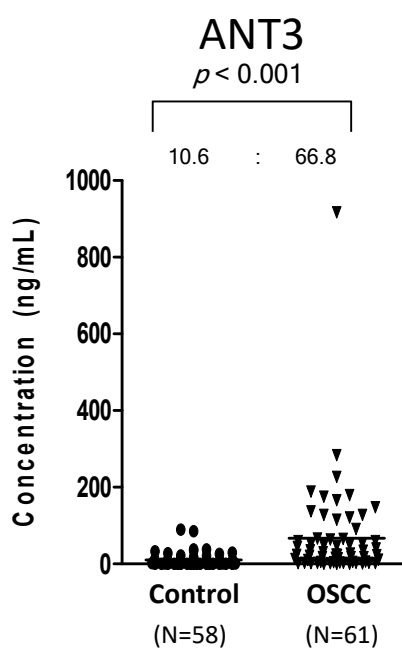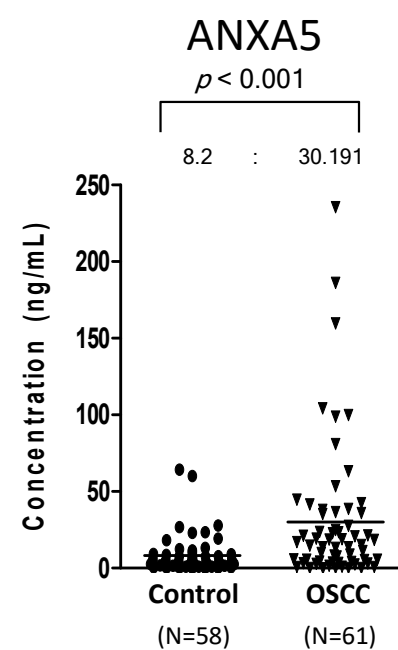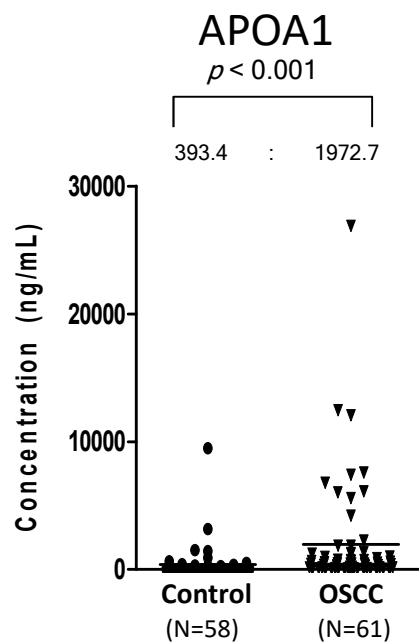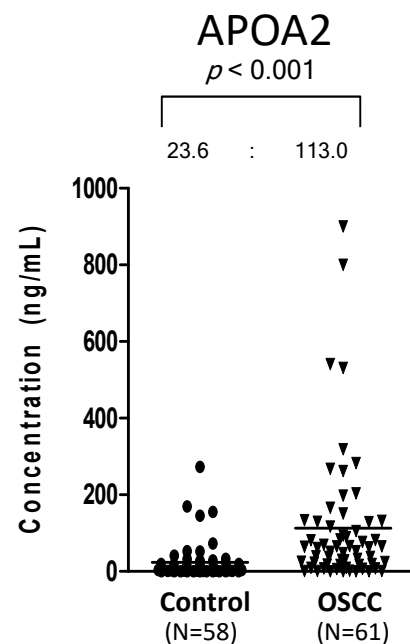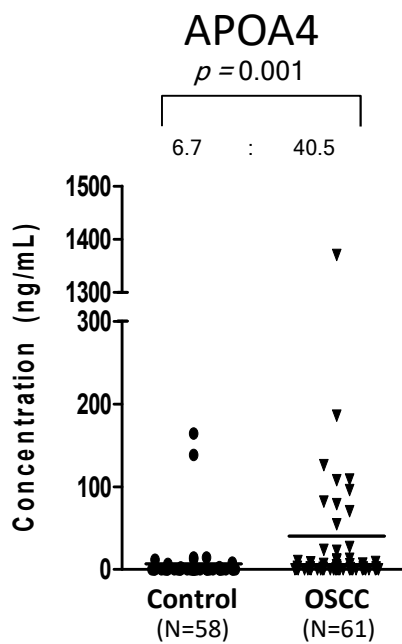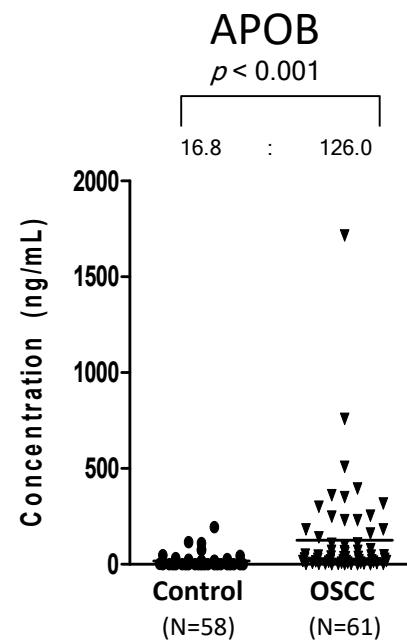

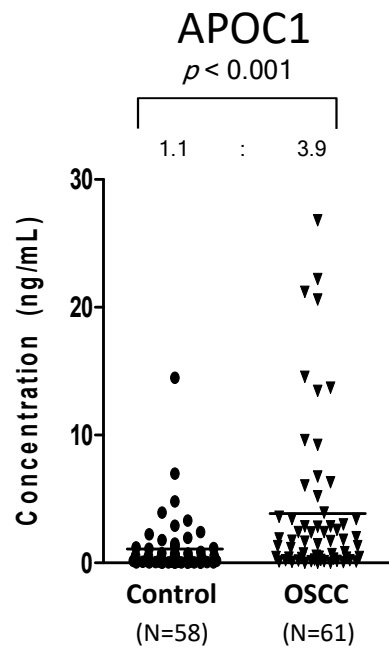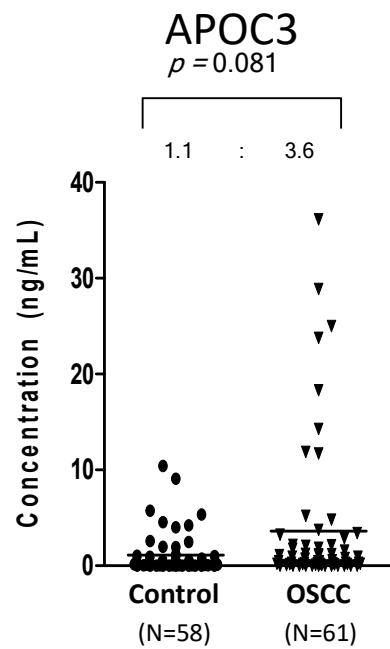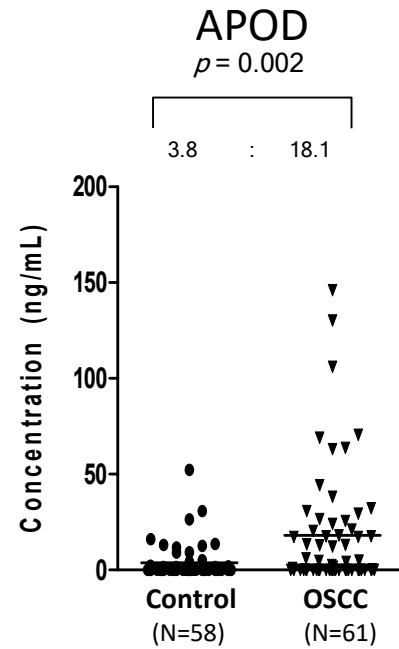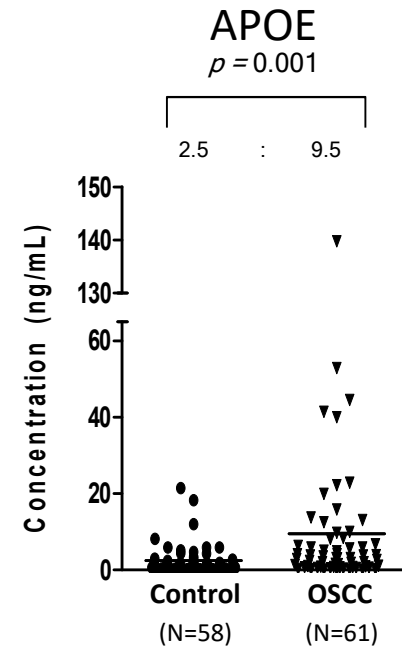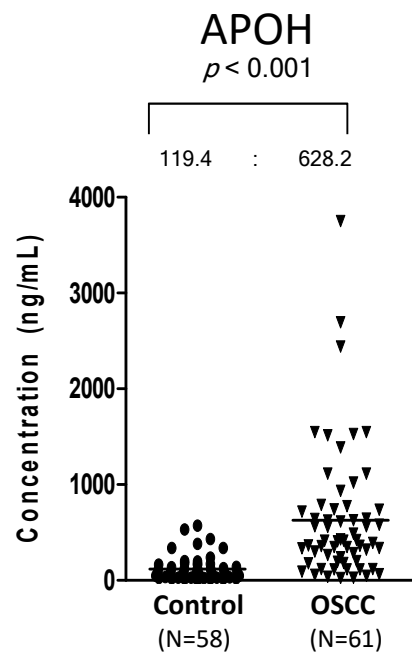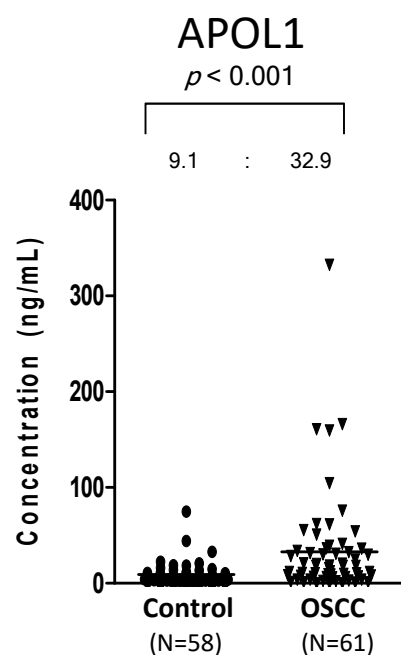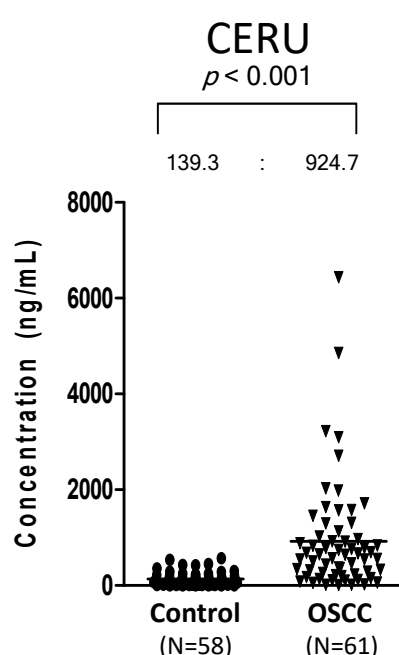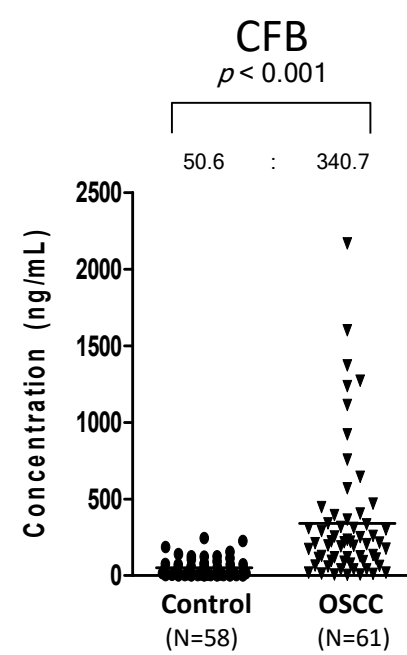

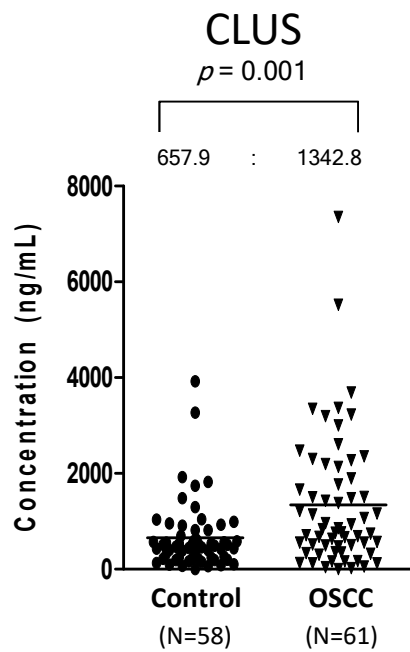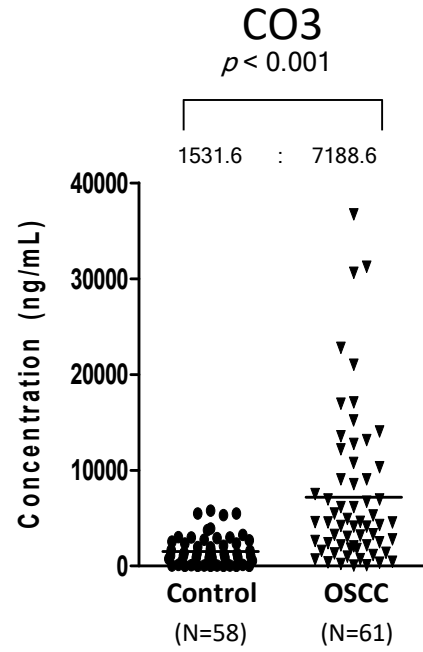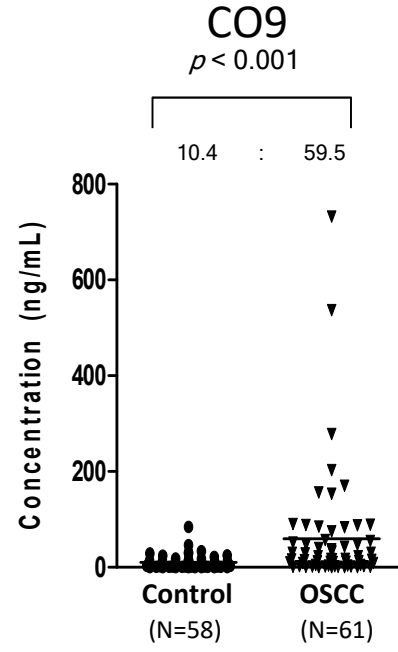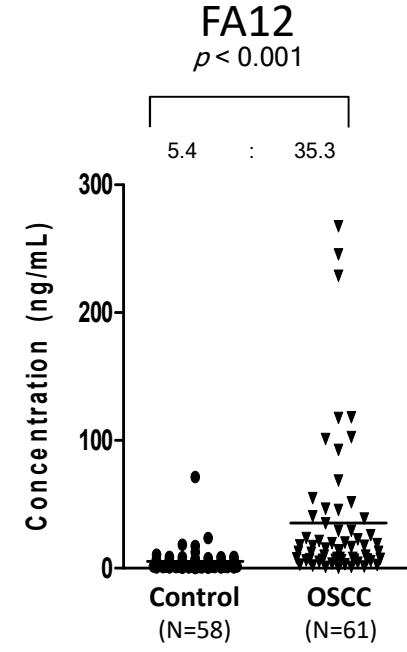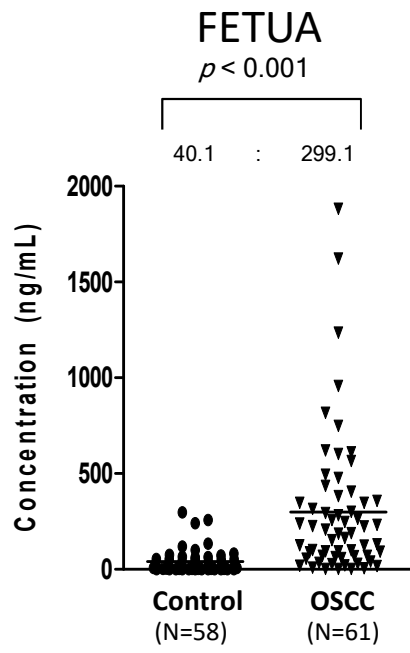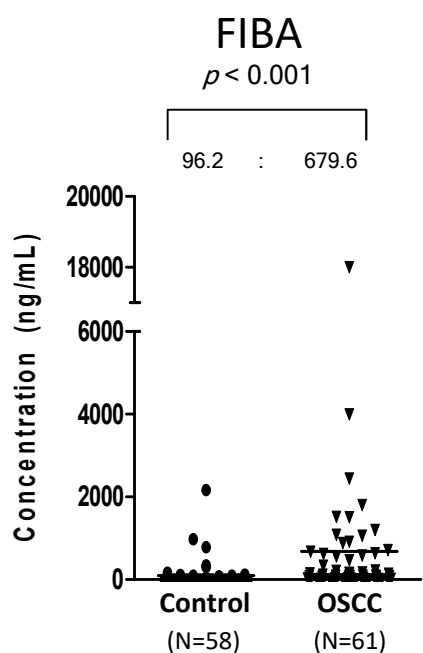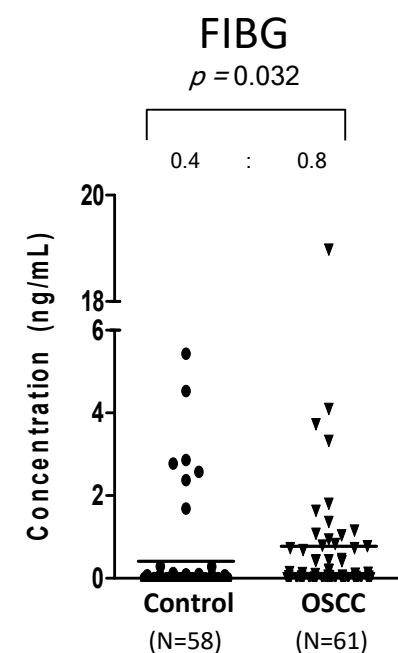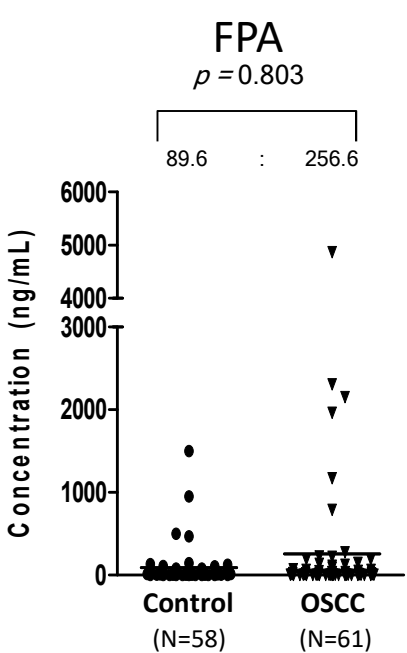



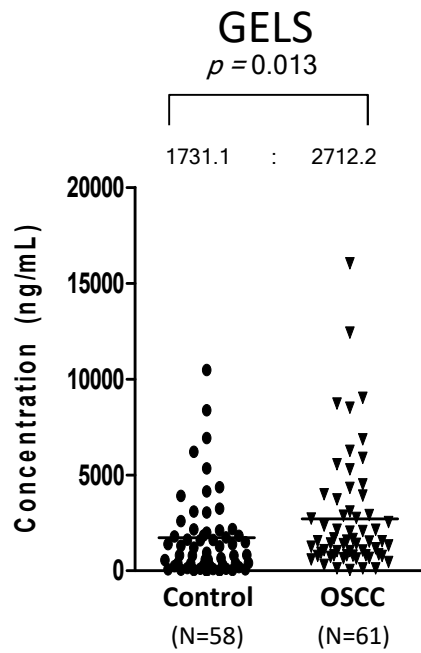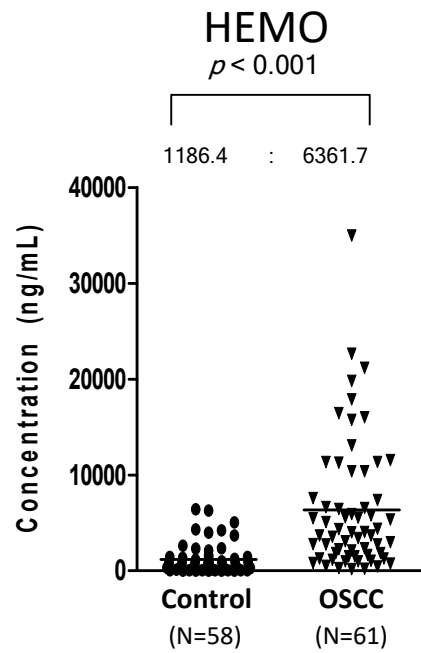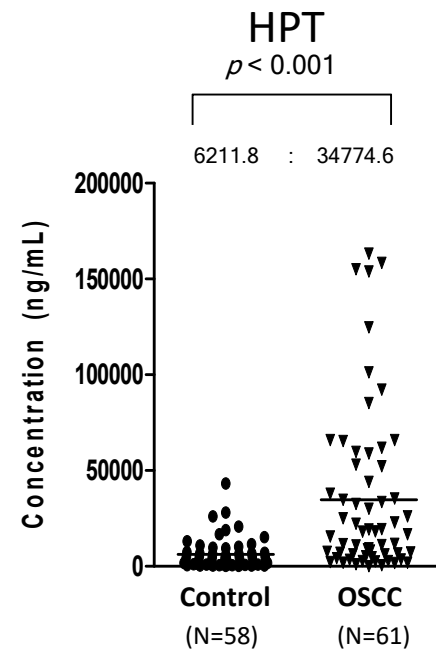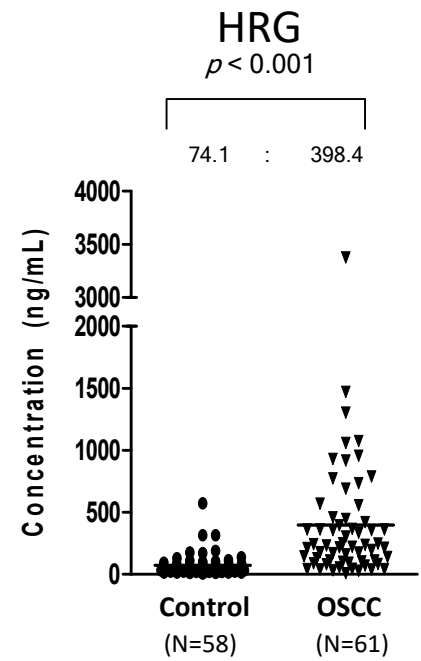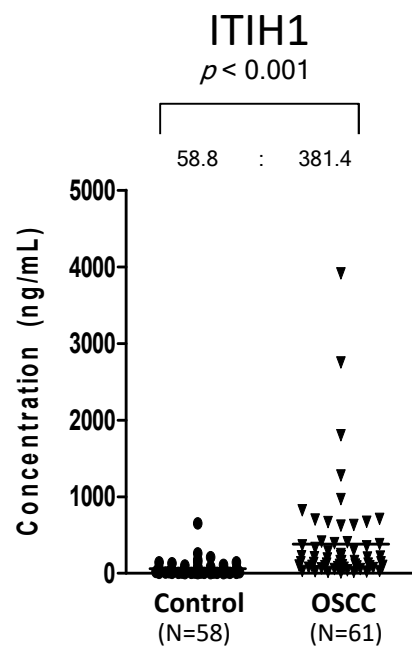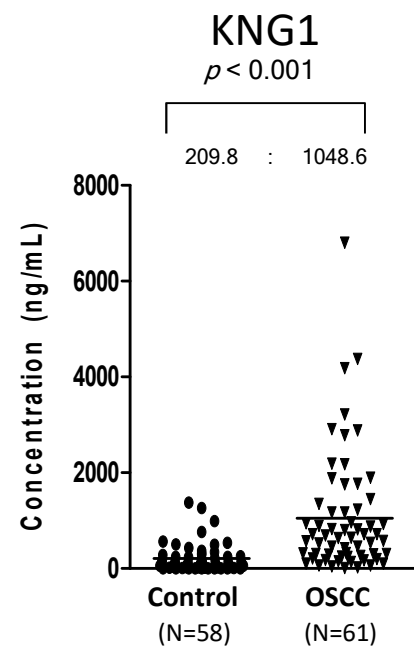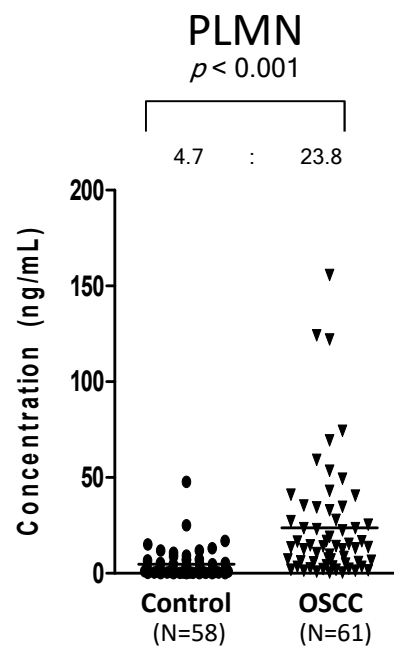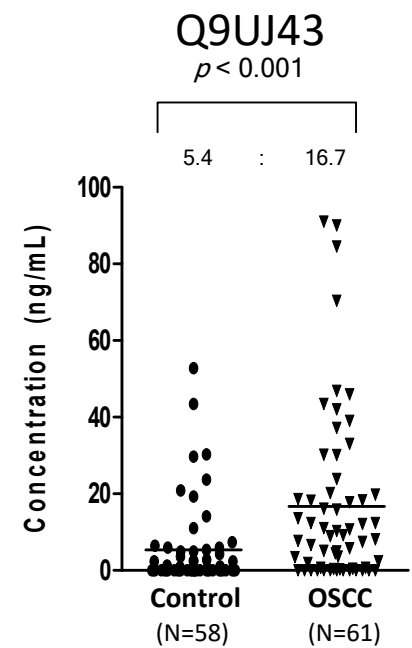

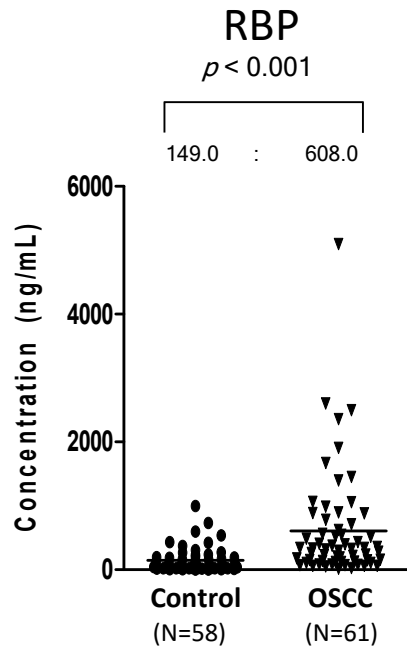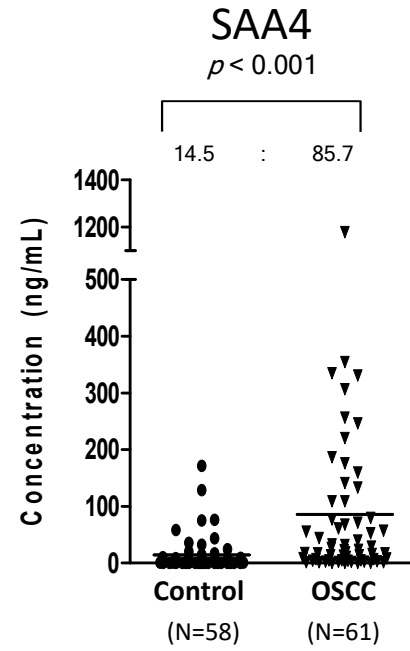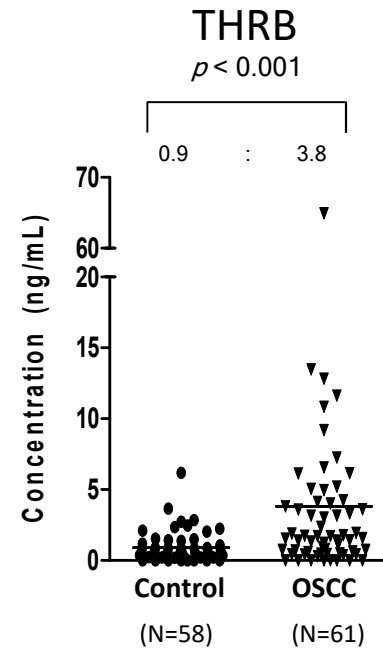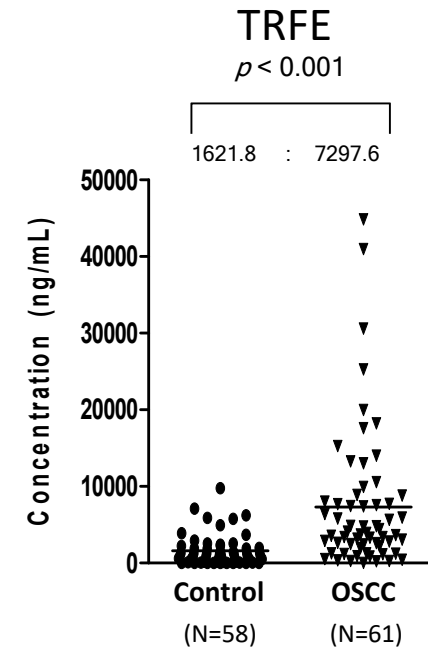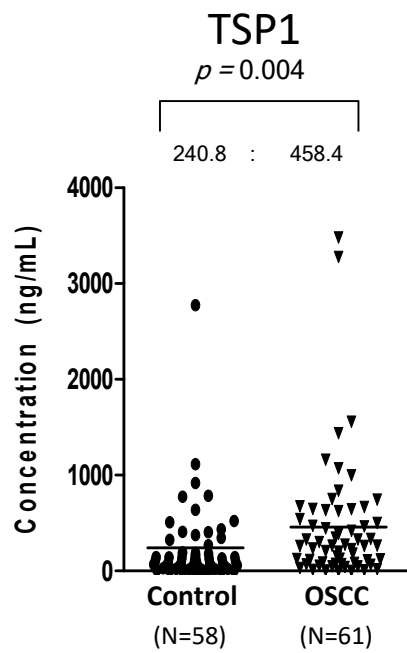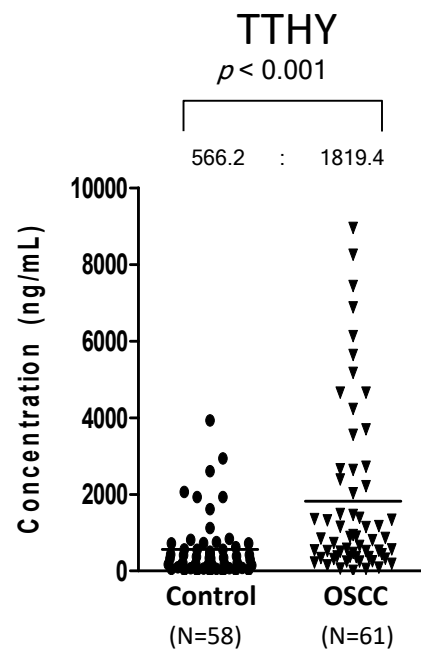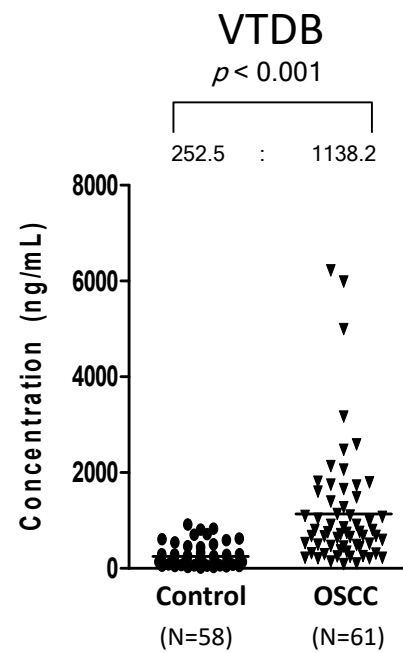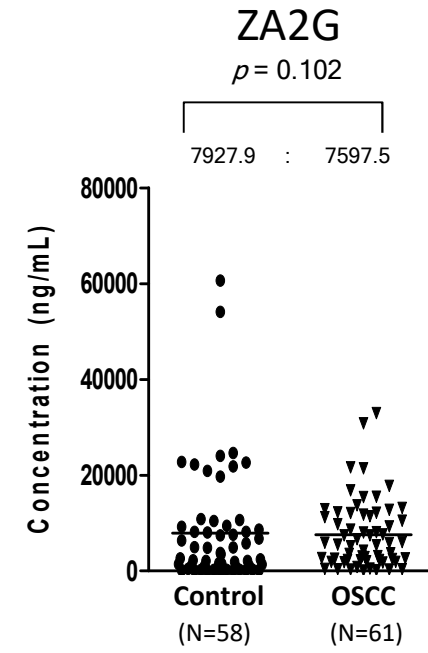

# Supplemental Figure S1E

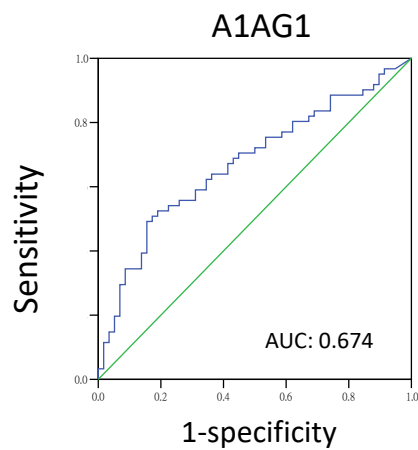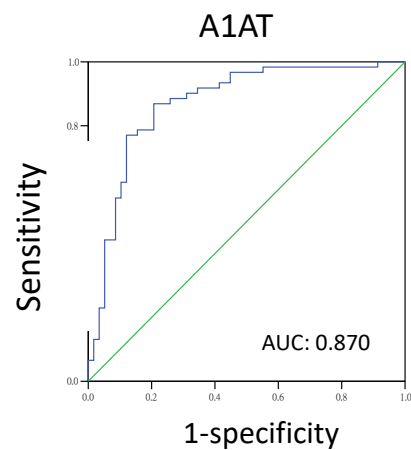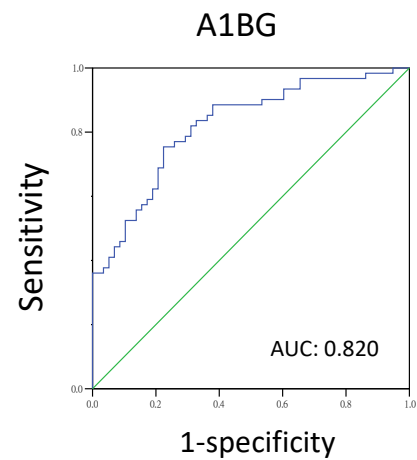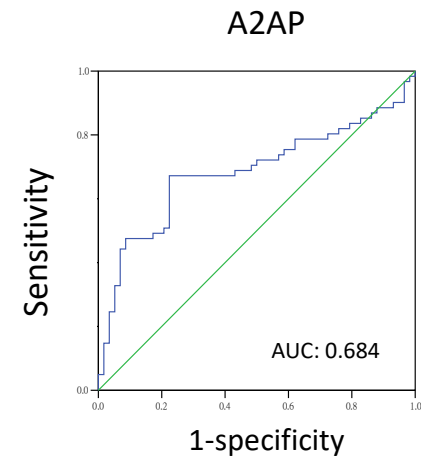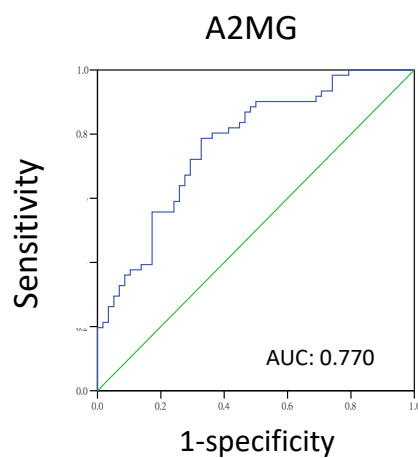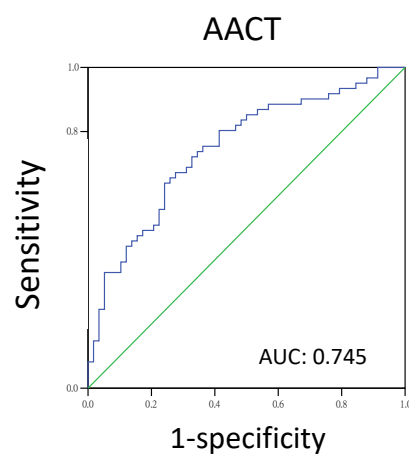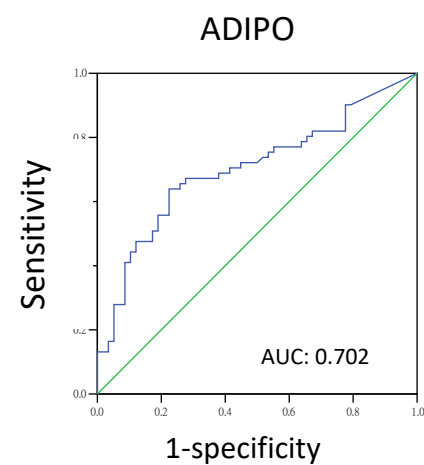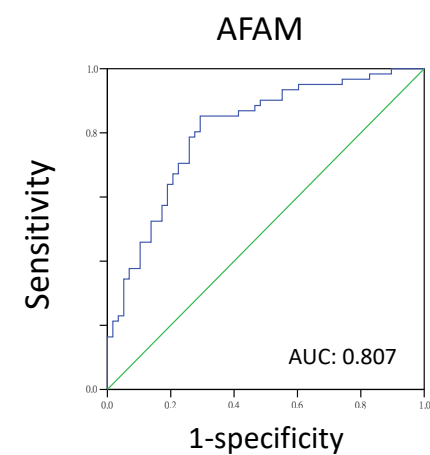

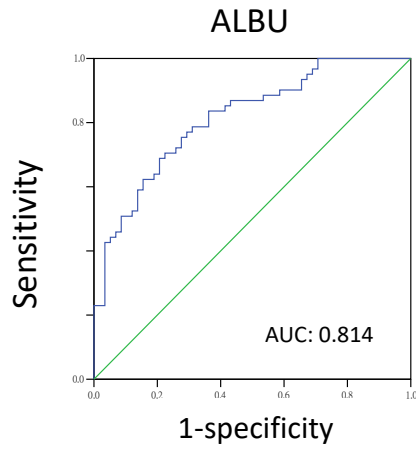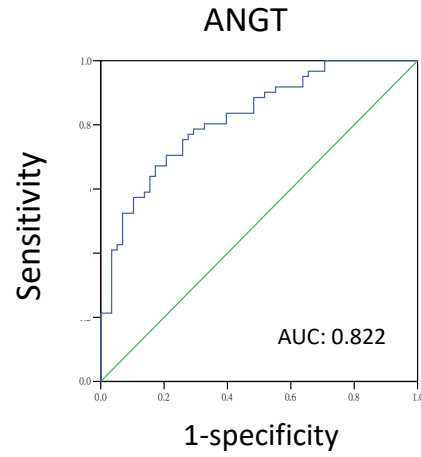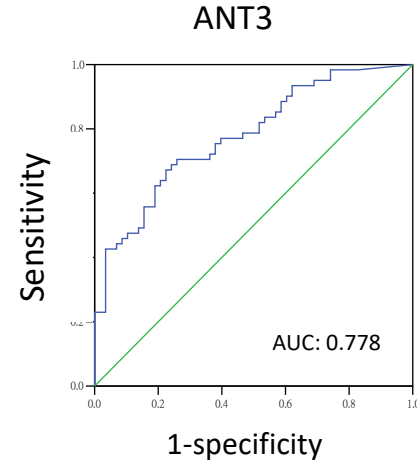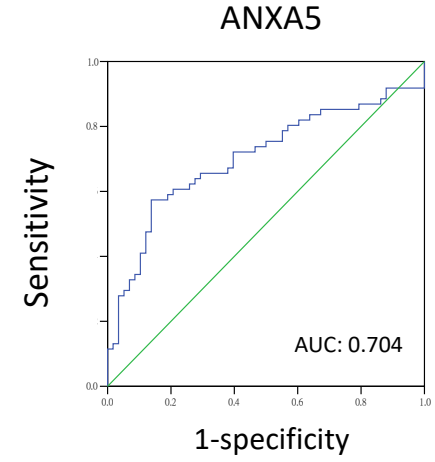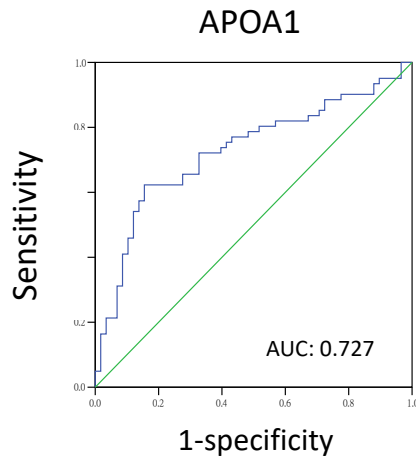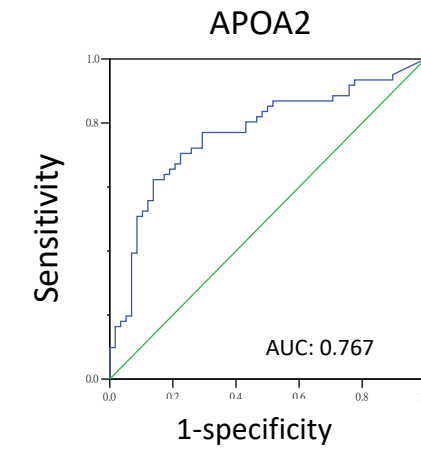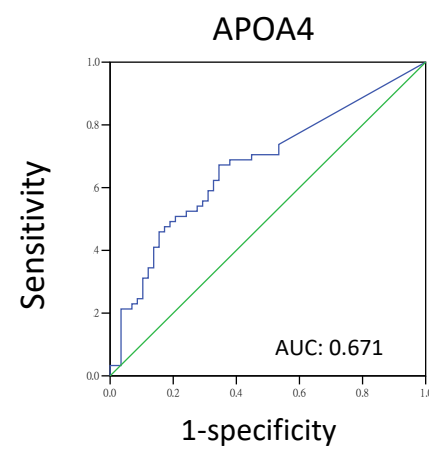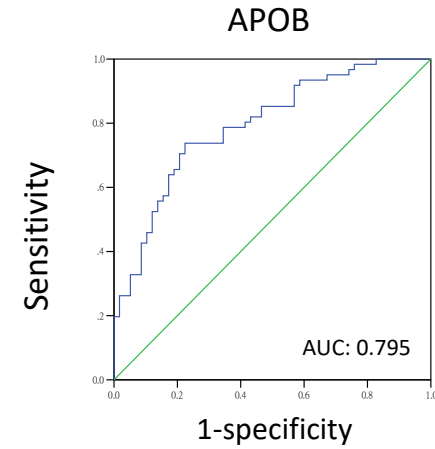

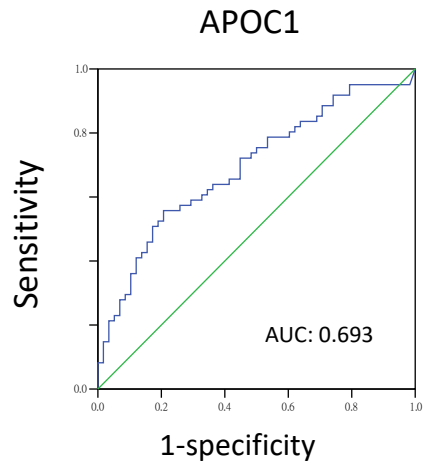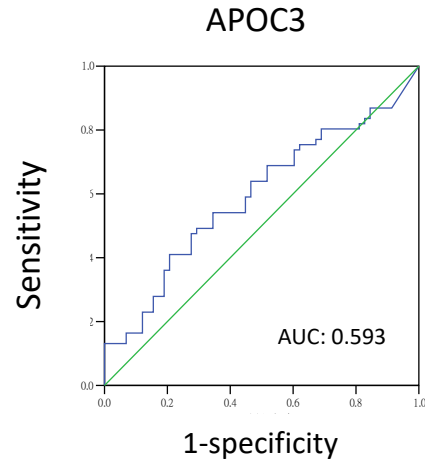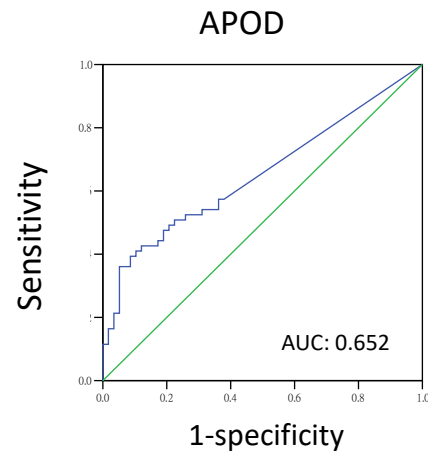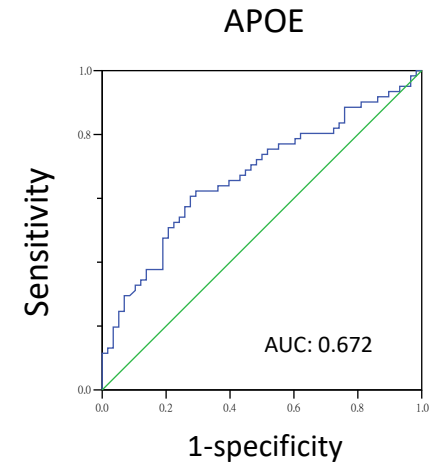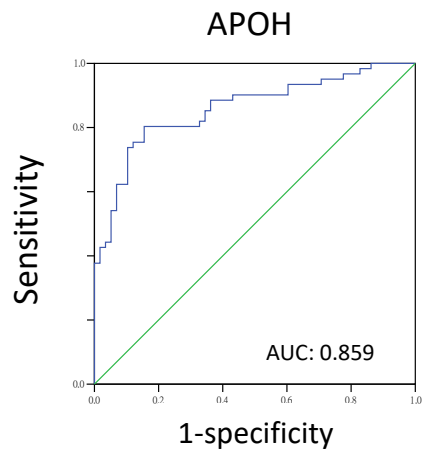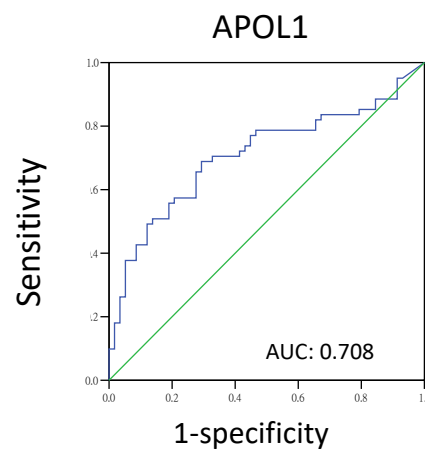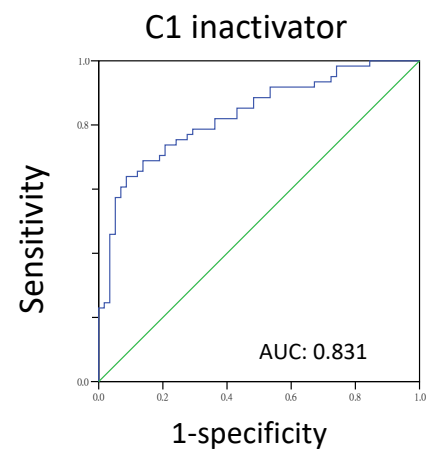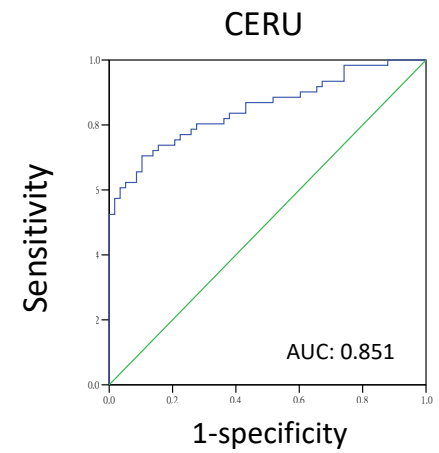

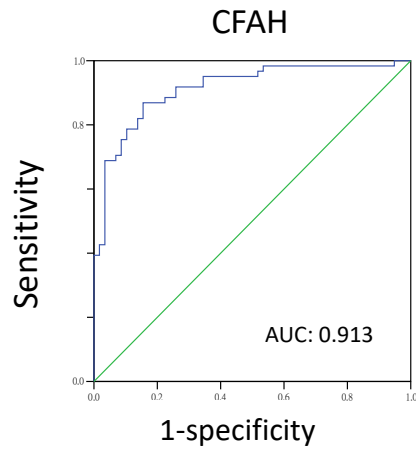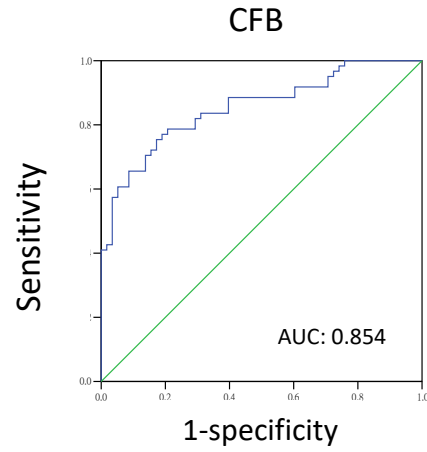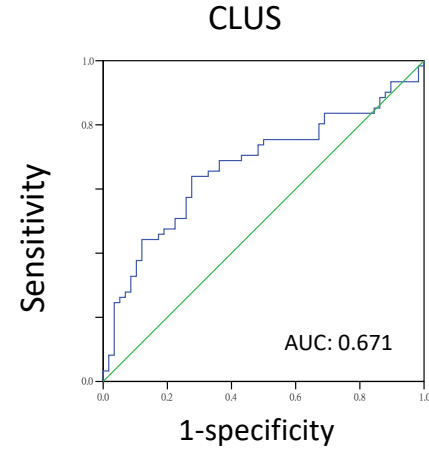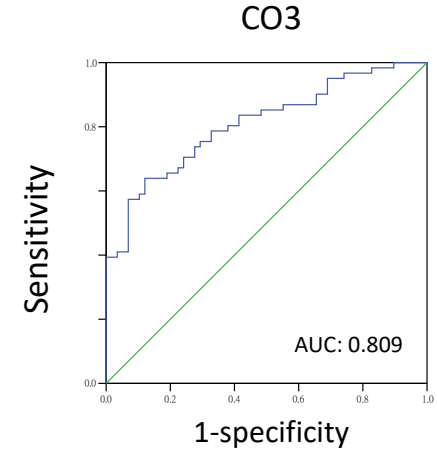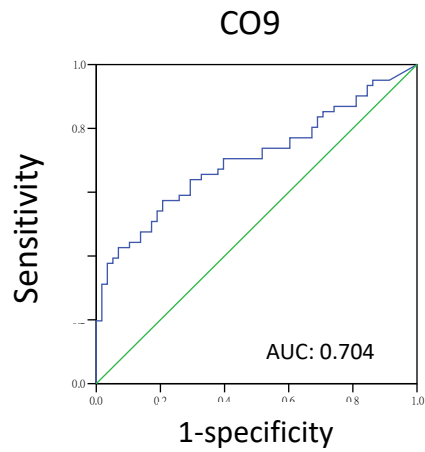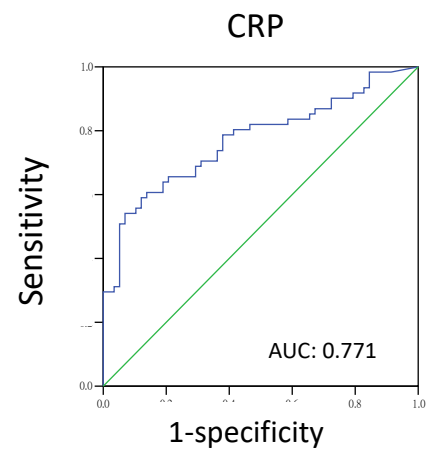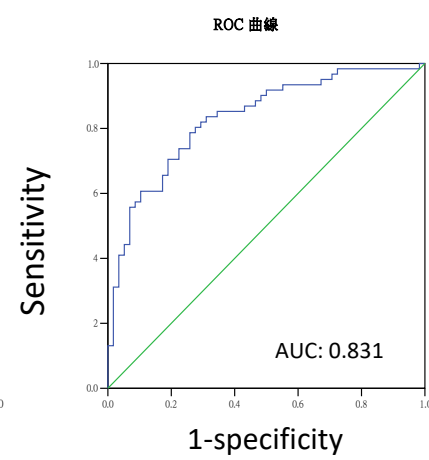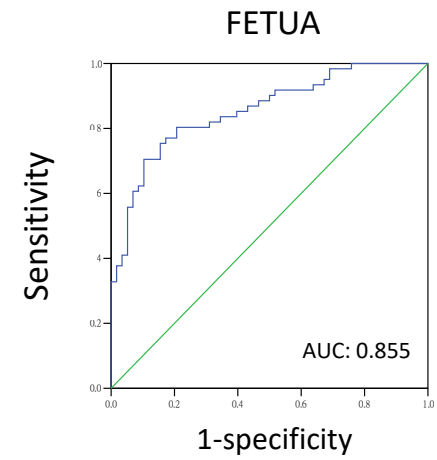

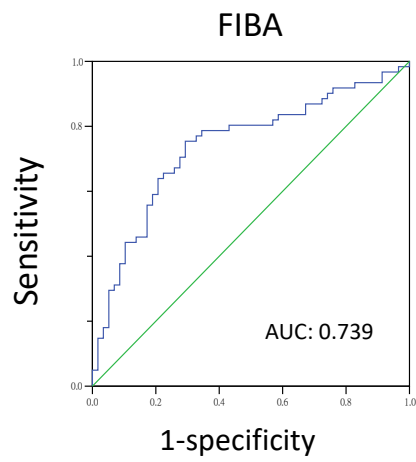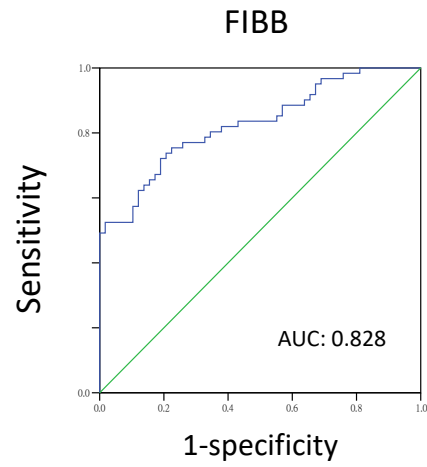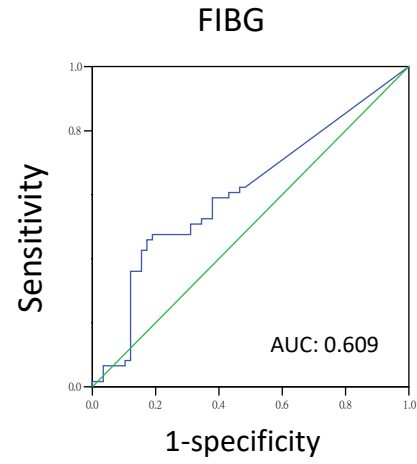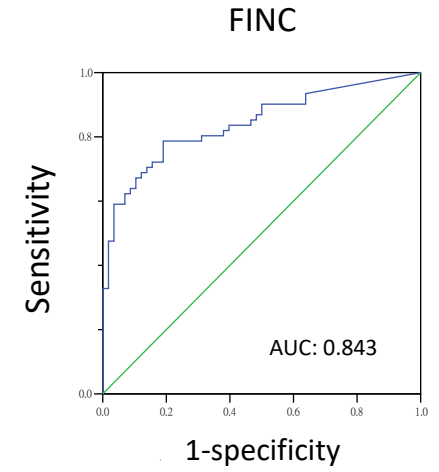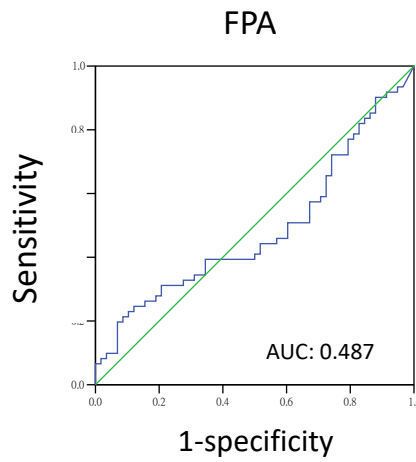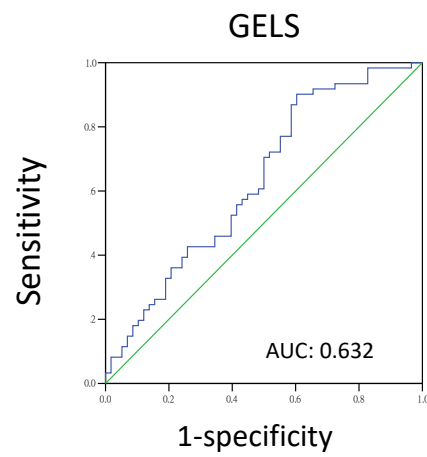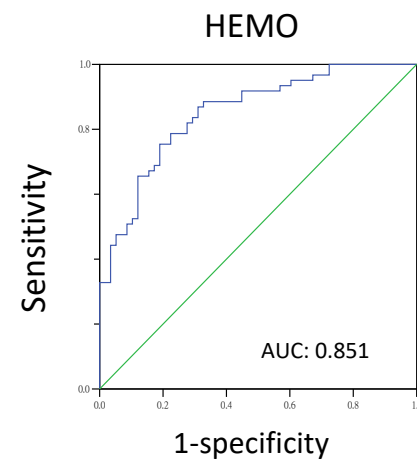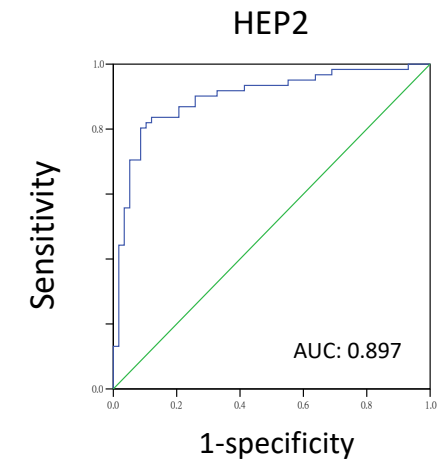

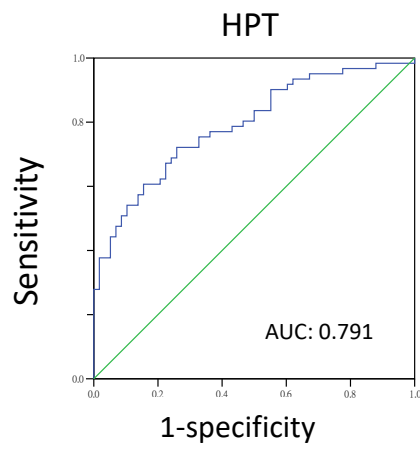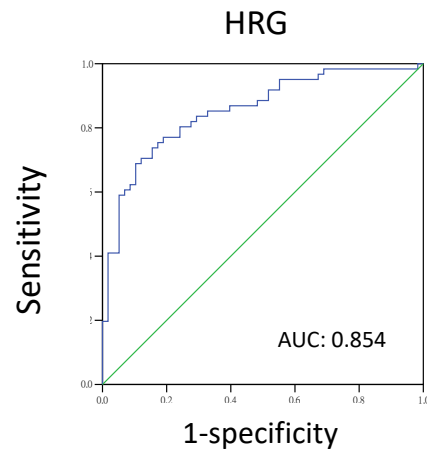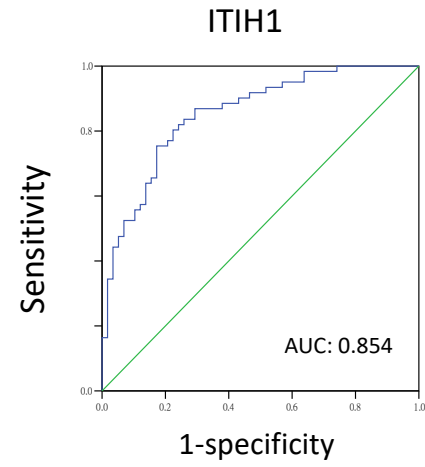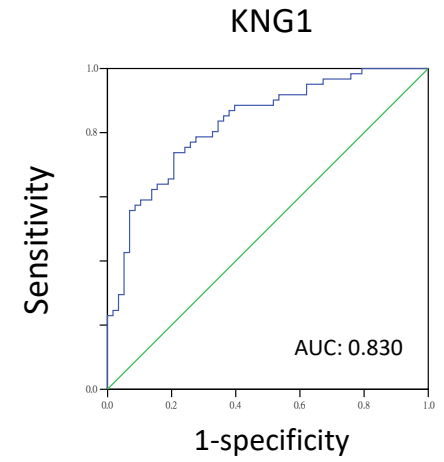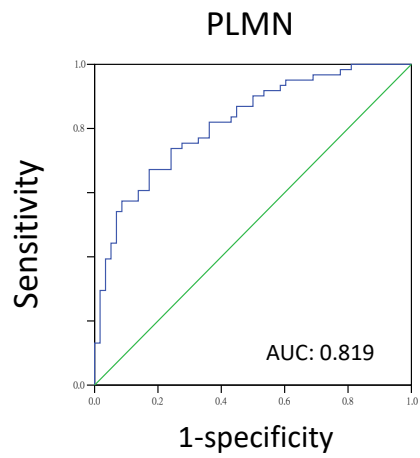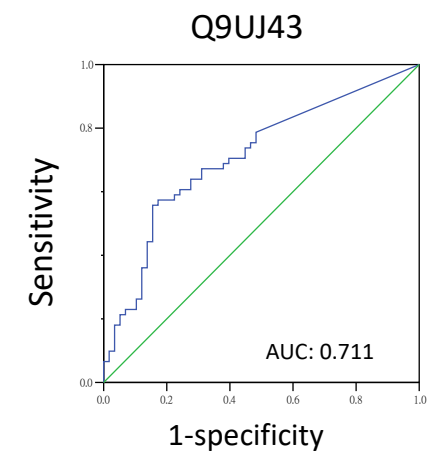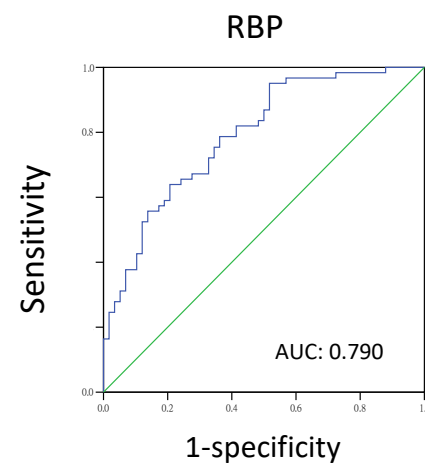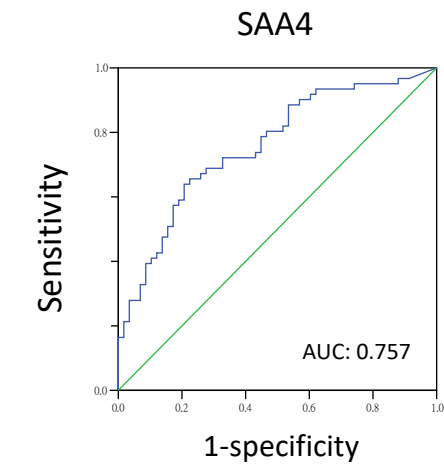



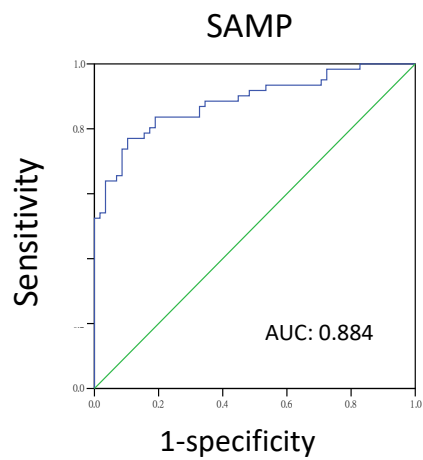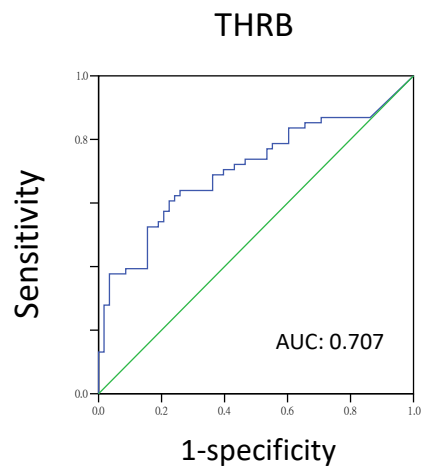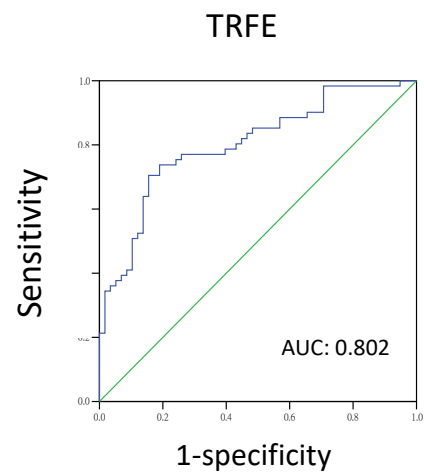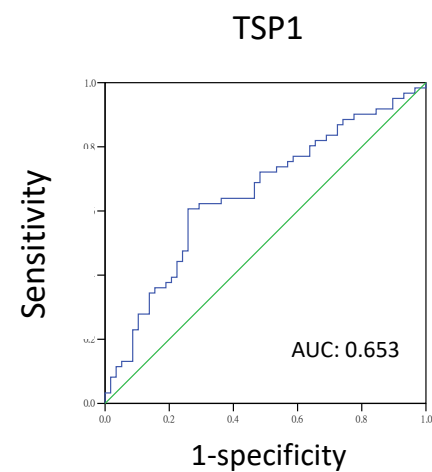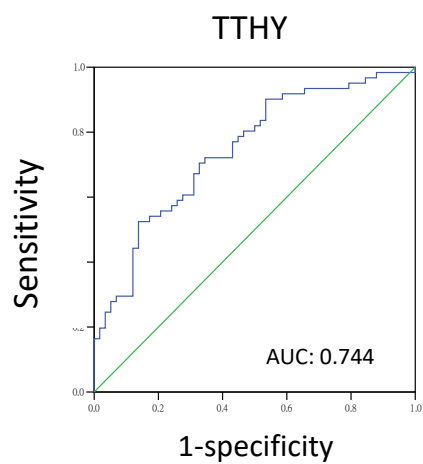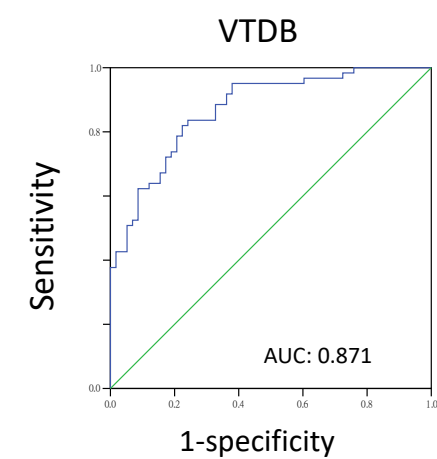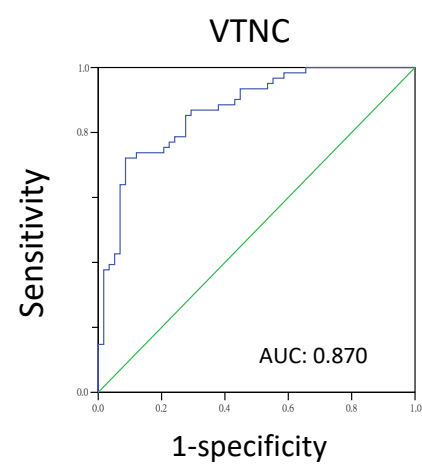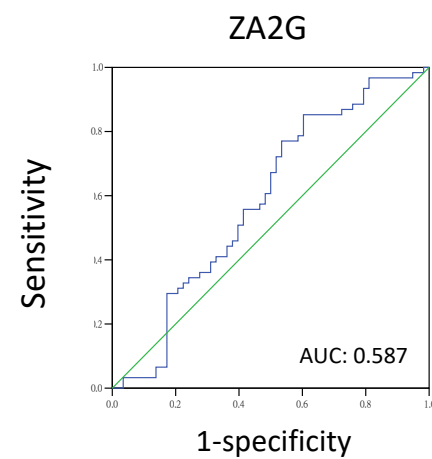

## Supplemental Figure S2

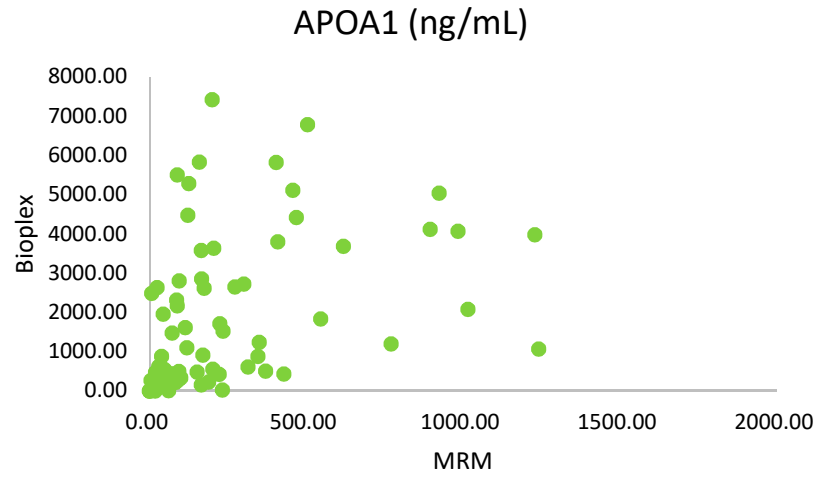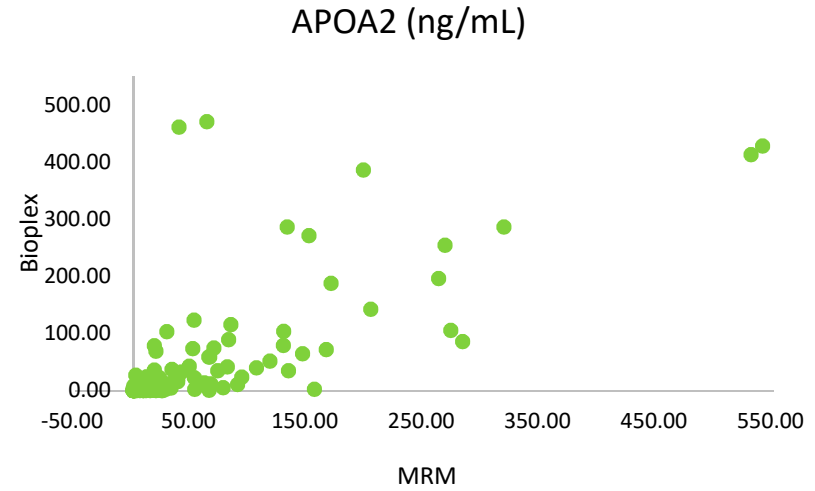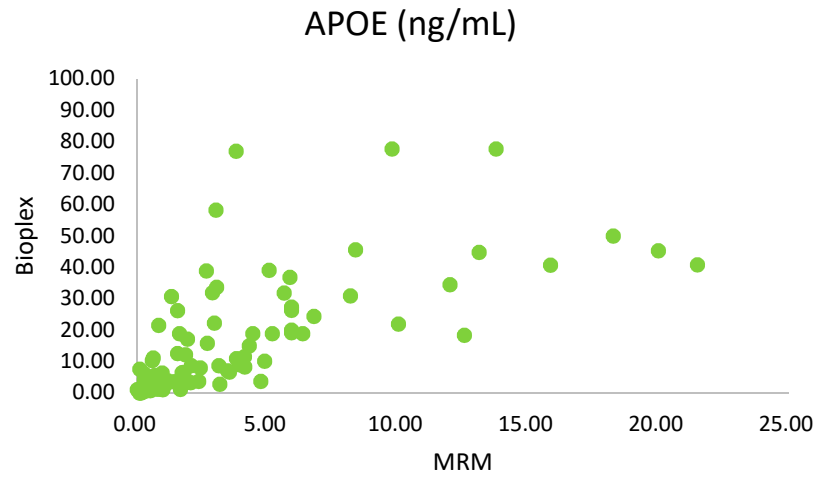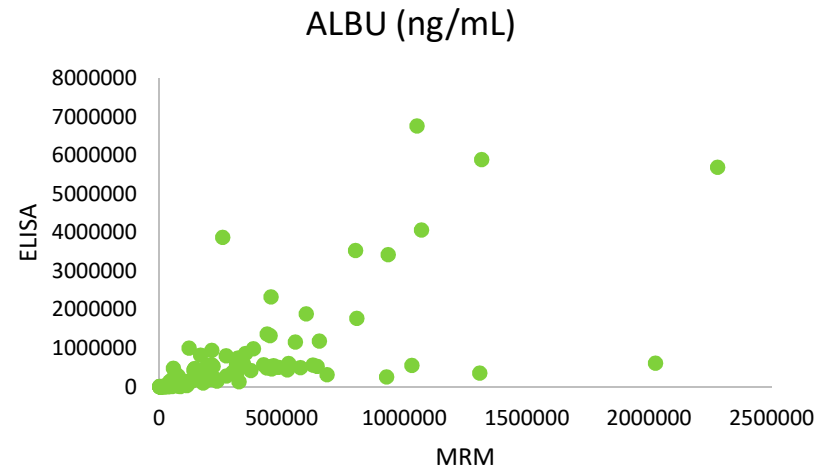

|                |                 | Spearman's correlation |                        |     |
|----------------|-----------------|------------------------|------------------------|-----|
| Protein name   | Assays          | Correlation (r)        | Significance (p-value) | n   |
| <b>APOA1</b>   | MRM vs. BioPlex | 0.792                  | < 0.001                | 117 |
| <b>APOA2</b>   | MRM vs. BioPlex | 0.779                  | < 0.001                | 117 |
| <b>APOE</b>    | MRM vs. BioPlex | 0.854                  | < 0.001                | 117 |
| <b>Albumin</b> | MRM vs. ELISA   | 0.871                  | < 0.001                | 116 |

# Supplemental Figure S3

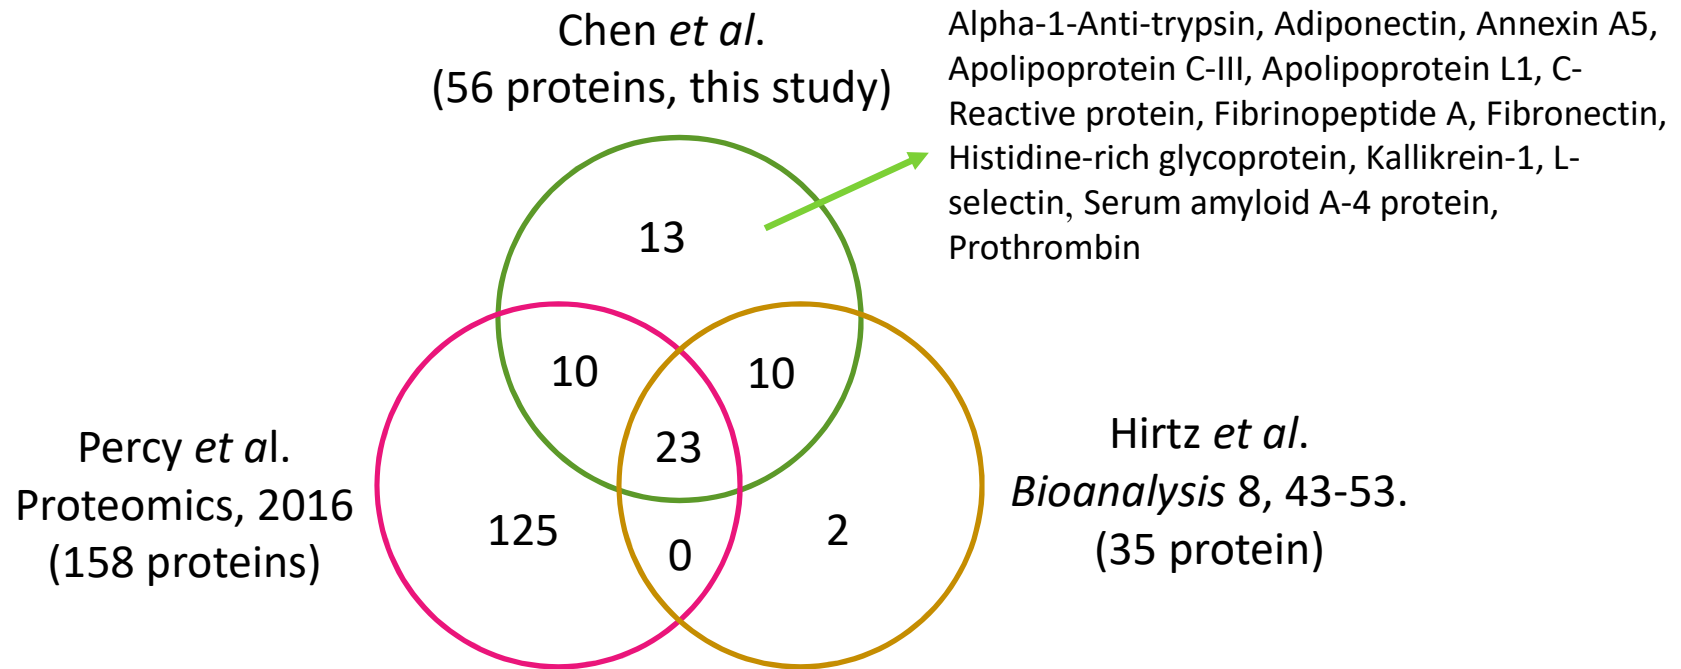

Supplement: 10.1074_M116.064758_mcp.M116.064758-1.pdf [file 10.1074_M116.064758_mcp.M116.064758-1.pdf]
