# Supplementary material
Source: PubMed Central journal article supplement (PMC5417822)
Supplement: 10.1074_M116.064758_mcp.M116.064758-2.pdf [file 10.1074_M116.064758_mcp.M116.064758-2.pdf]

**Supporting information:**

**Development of a multiplexed LC-MRM/MS method for evaluation of salivary proteins as oral cancer biomarkers**

Yi-Ting Chen<sup>1,2,3,4\*</sup>, Hsiao-Wei Chen<sup>2</sup>, Chun-Feng Wu<sup>2</sup>, Lichieh Julie Chu<sup>2,5</sup>, Wei-Fang Chiang<sup>6,7</sup>, Chih-Ching Wu<sup>2,8,9</sup>, Jau-Song Yu<sup>2,3,5</sup>, Cheng-Han Tsai<sup>3</sup>, Kung-Hao Liang<sup>5</sup>, Yu-Sun Chang<sup>2,3,9</sup>, Maureen Wu<sup>2</sup>, Wei-Ting Ou Yang<sup>2</sup>

<sup>1</sup> Department of Biomedical Sciences, College of Medicine, Chang Gung University, Taoyuan, Taiwan

<sup>2</sup> Molecular Medicine Research Center, Chang Gung University, Taoyuan, Taiwan

<sup>3</sup> Graduate Institute of Biomedical Sciences, College of Medicine, Chang Gung University, Taoyuan, Taiwan

<sup>4</sup> Department of Nephrology, Chang Gung Memorial Hospital, Linkou Medical Center, Taoyuan, Taiwan

<sup>5</sup> Liver Research Center, Chang Gung Memorial Hospital, Linkou, Taiwan

<sup>6</sup> Department of Oral & Maxillofacial Surgery, Chi-Mei Medical Center, Liouying, Taiwan

<sup>7</sup> School of Dentistry, National Yang Ming University, Taipei, Taiwan

<sup>8</sup> Department of Medical Biotechnology and Laboratory Science, College of Medicine, Chang Gung University, Taoyuan, Taiwan

<sup>9</sup> Department of Otolaryngology - Head & Neck Surgery, Chang Gung Memorial Hospital, Linkou, Taiwan

## Supplemental Figure S1A. Calibration Curves

The following shows the calibration curve for each analyte. Note that for this example data this is the externally imported calibration.

**Analyte Name:** ADIPO.IFYNQQNHYDGSTGK.3/y13(2+).M00

**Calibration Equation:**  $y = 1.04622 x + 4.22291e-4$  ( $r = 0.98883$ ) (weighting:  $1 / x$ )

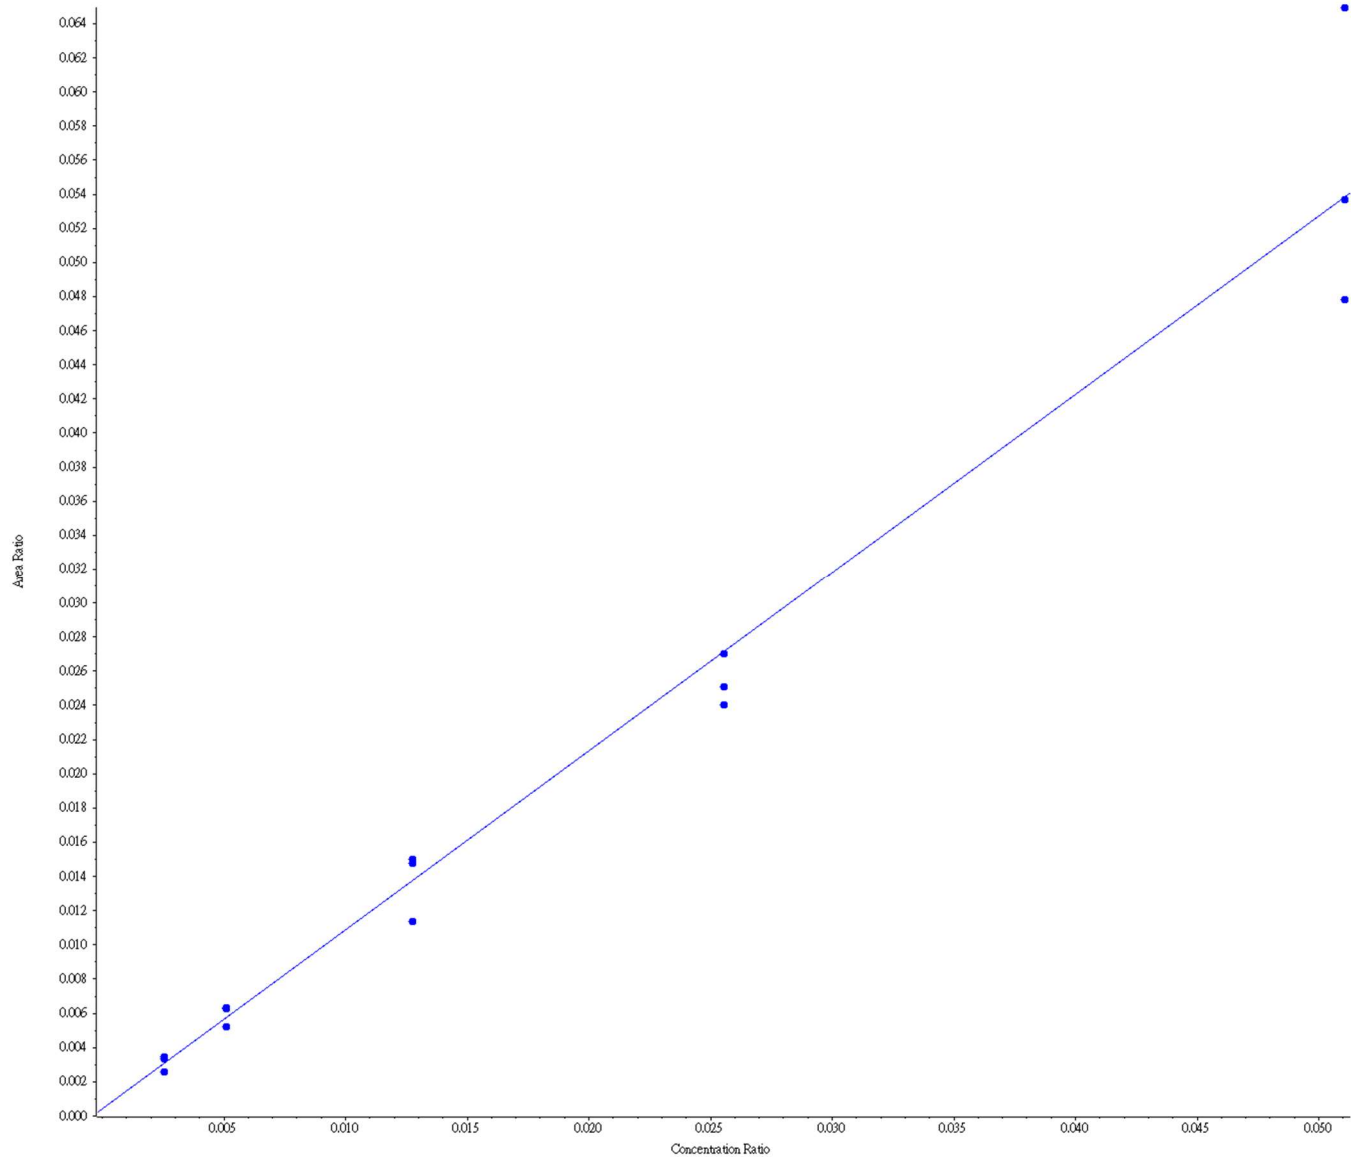

Analyte Name: AFAM.DADPDTFFAK.2/y7(2+).M00

Calibration Equation:  $y = 0.90958x + -0.00603$  ( $r = 0.99404$ ) (weighting:  $1/x$ )

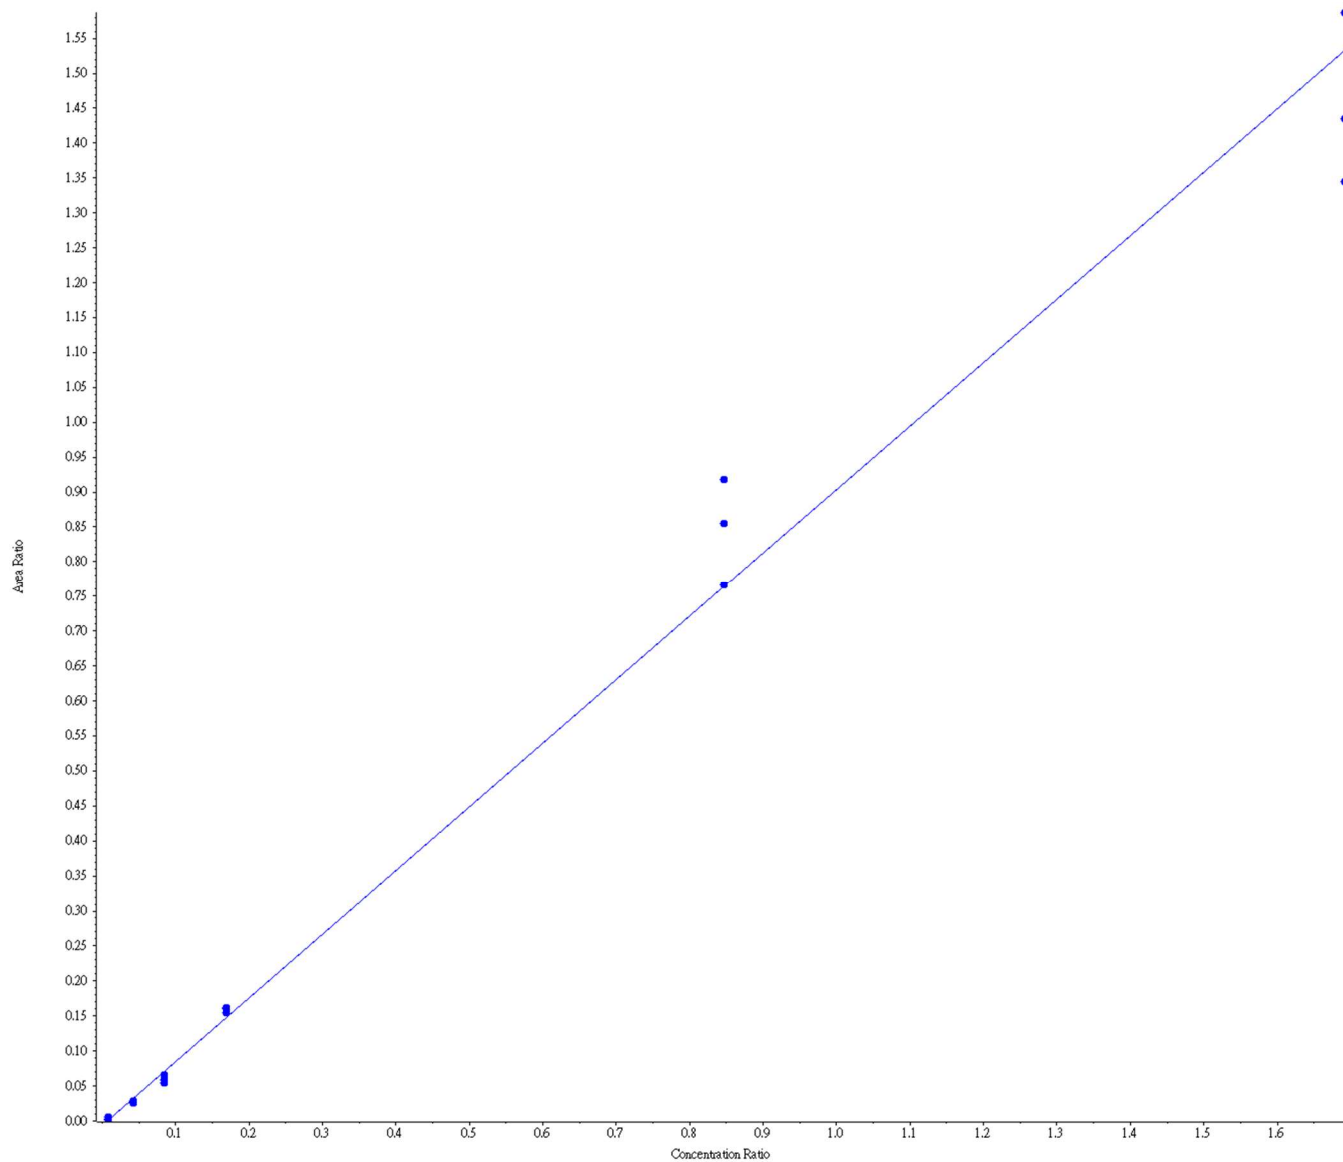

Analyte Name: A1AT.LSITGTYDLK.2/y6.M00

Calibration Equation:  $y = 1.08350 x + -0.02503$  ( $r = 0.99203$ ) (weighting:  $1 / x$ )

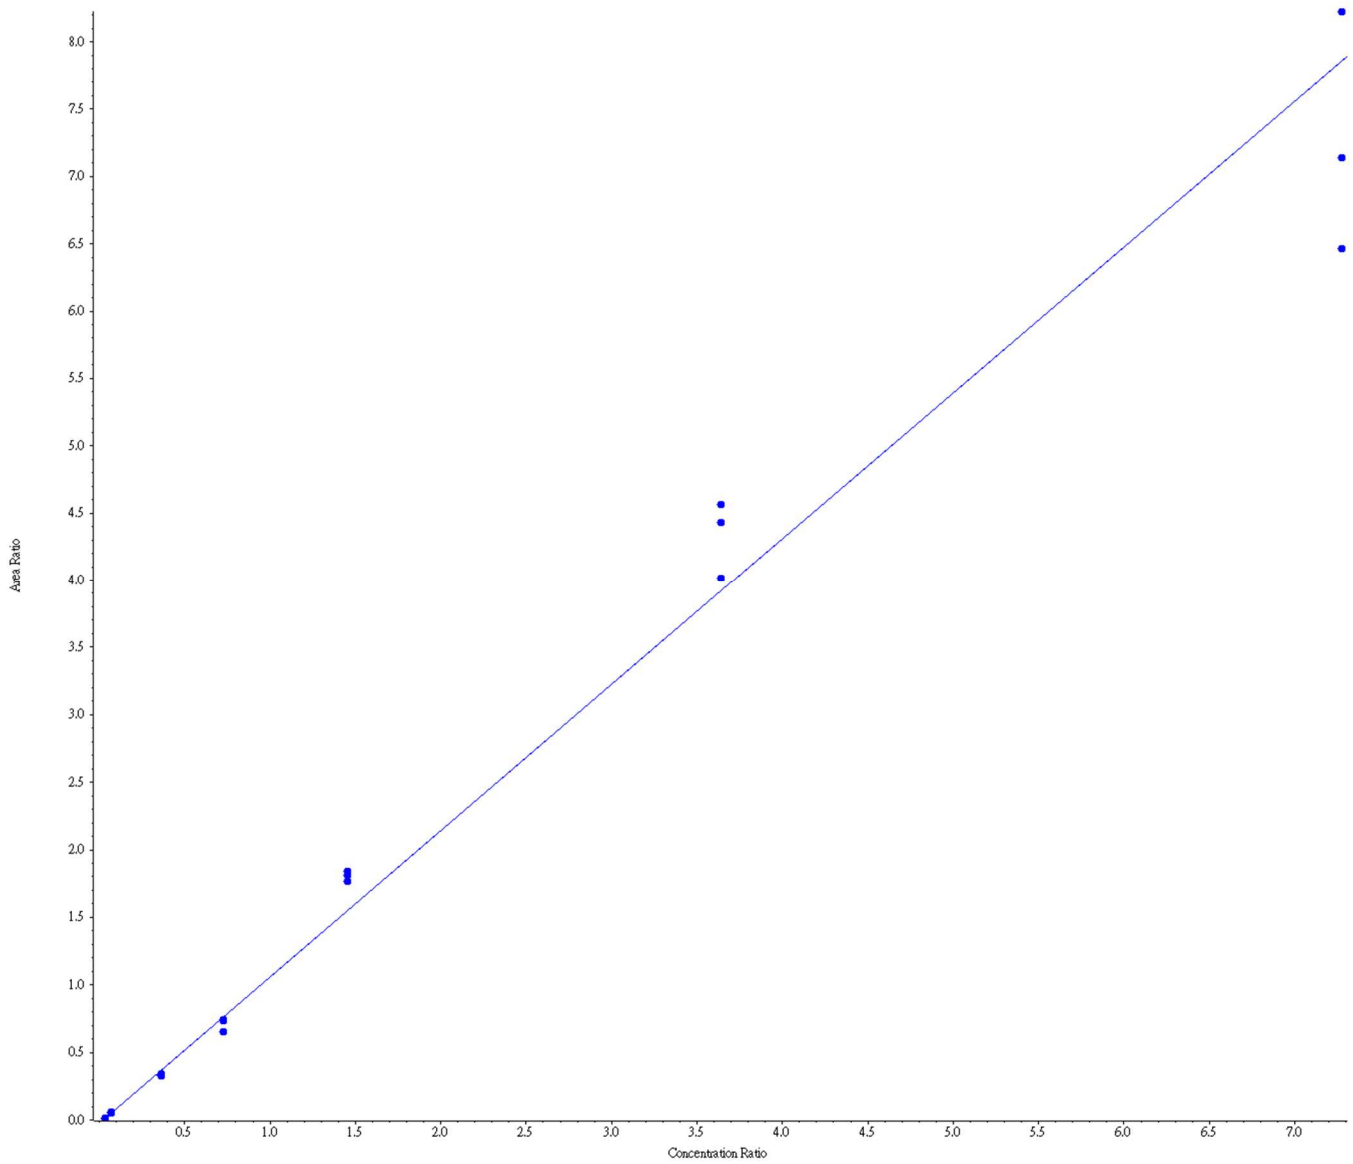

Analyte Name: FETUA.HTLNQIDEVK.3/y4.M00

Calibration Equation:  $y = 1.01389x + 0.00588$  ( $r = 0.99906$ ) (weighting:  $1/x$ )

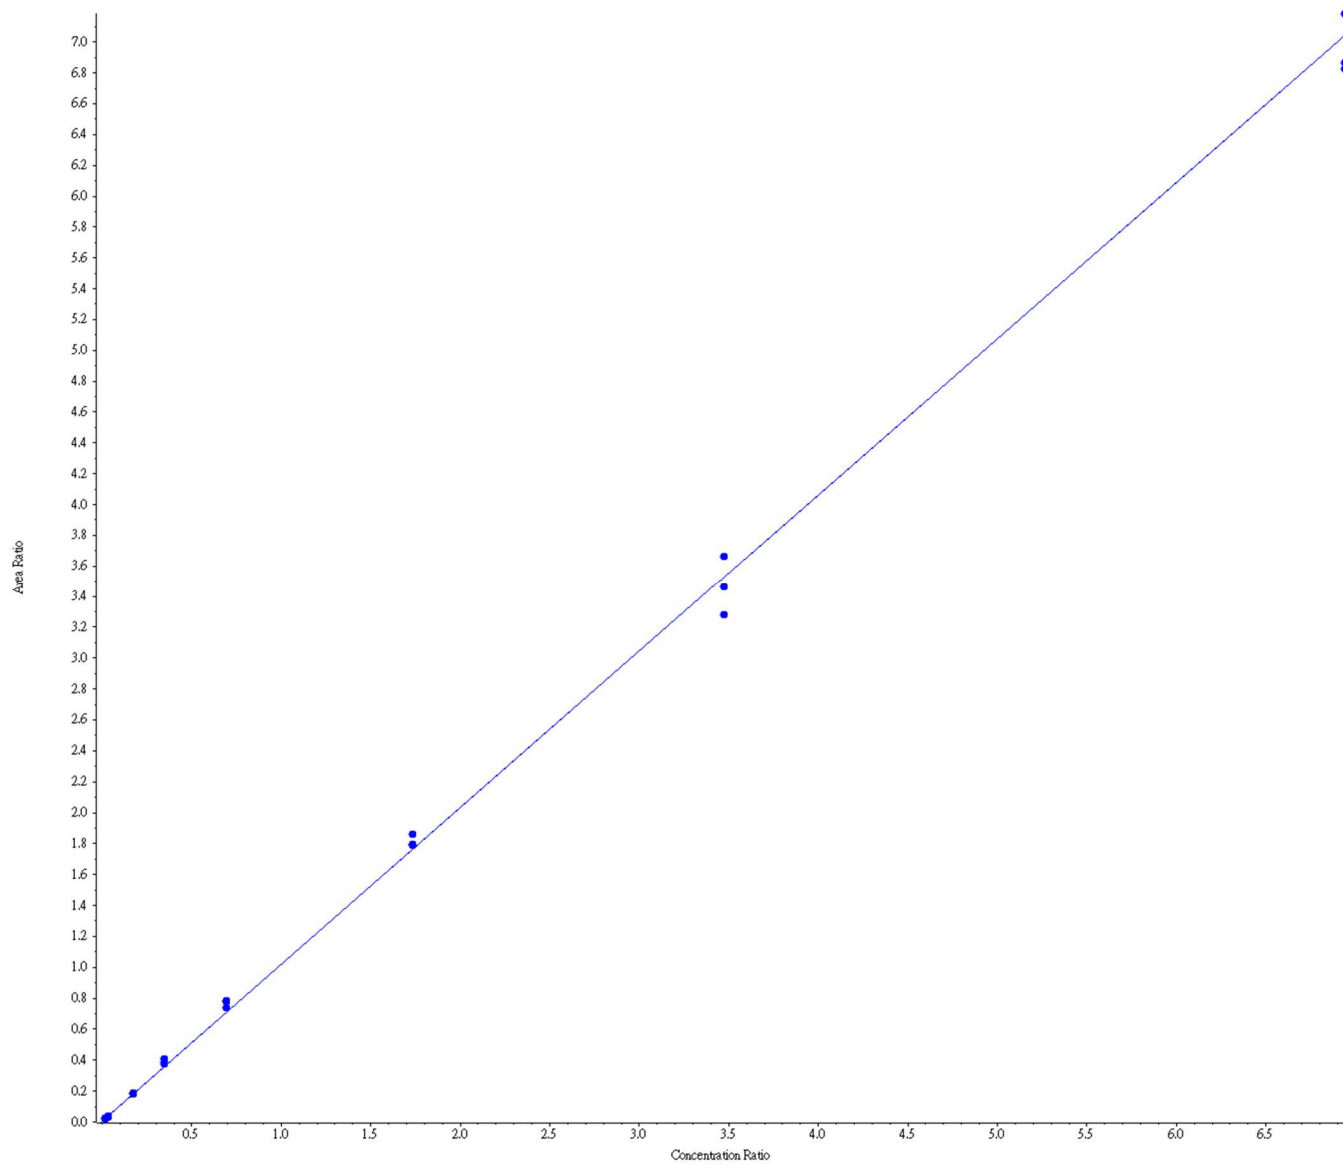

Analyte Name: ANGT.ALQDQLVLVAAK.2/y10(2+).M00

Calibration Equation:  $y = 0.99112 x + -0.00102$  ( $r = 0.99832$ ) (weighting:  $1 / x$ )

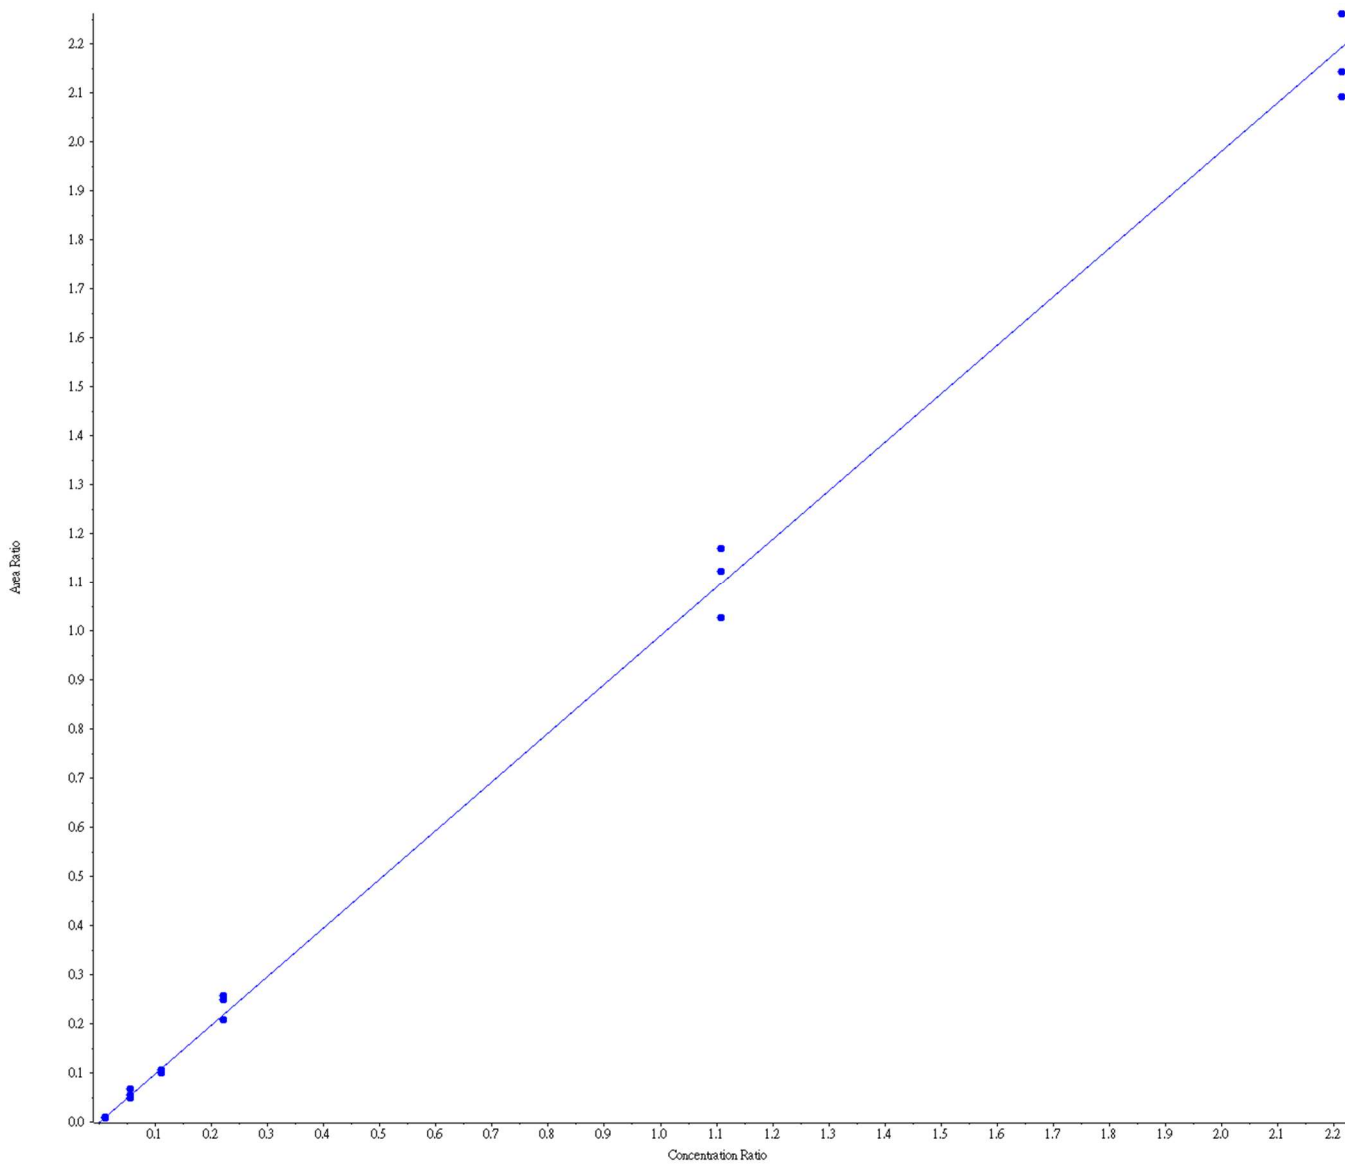

Analyte Name: ANXA5.GTVTDFPGFDER.2/y6.M00

Calibration Equation:  $y = 0.99055 x + -0.00136$  ( $r = 0.99120$ ) (weighting:  $1 / x$ )

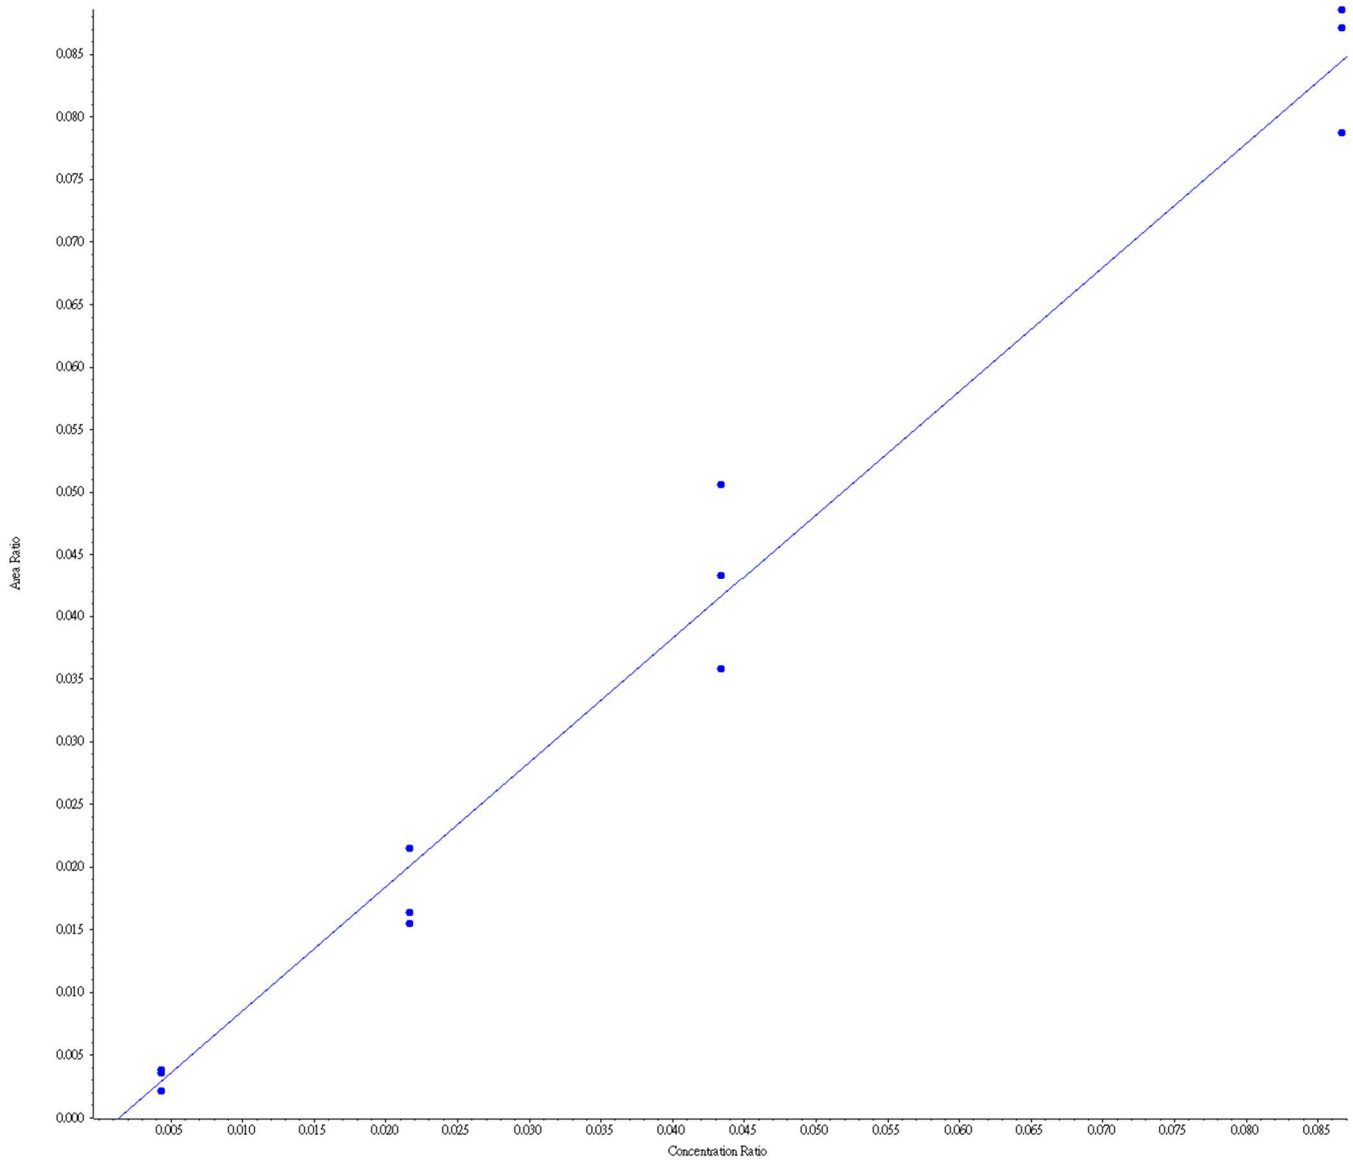

Analyte Name: APOA1.ATEHLSTLSEK.3/y9(2+).M00

Calibration Equation:  $y = 0.98413x + 1.17532e-4$  ( $r = 0.99948$ ) (weighting:  $1/x$ )

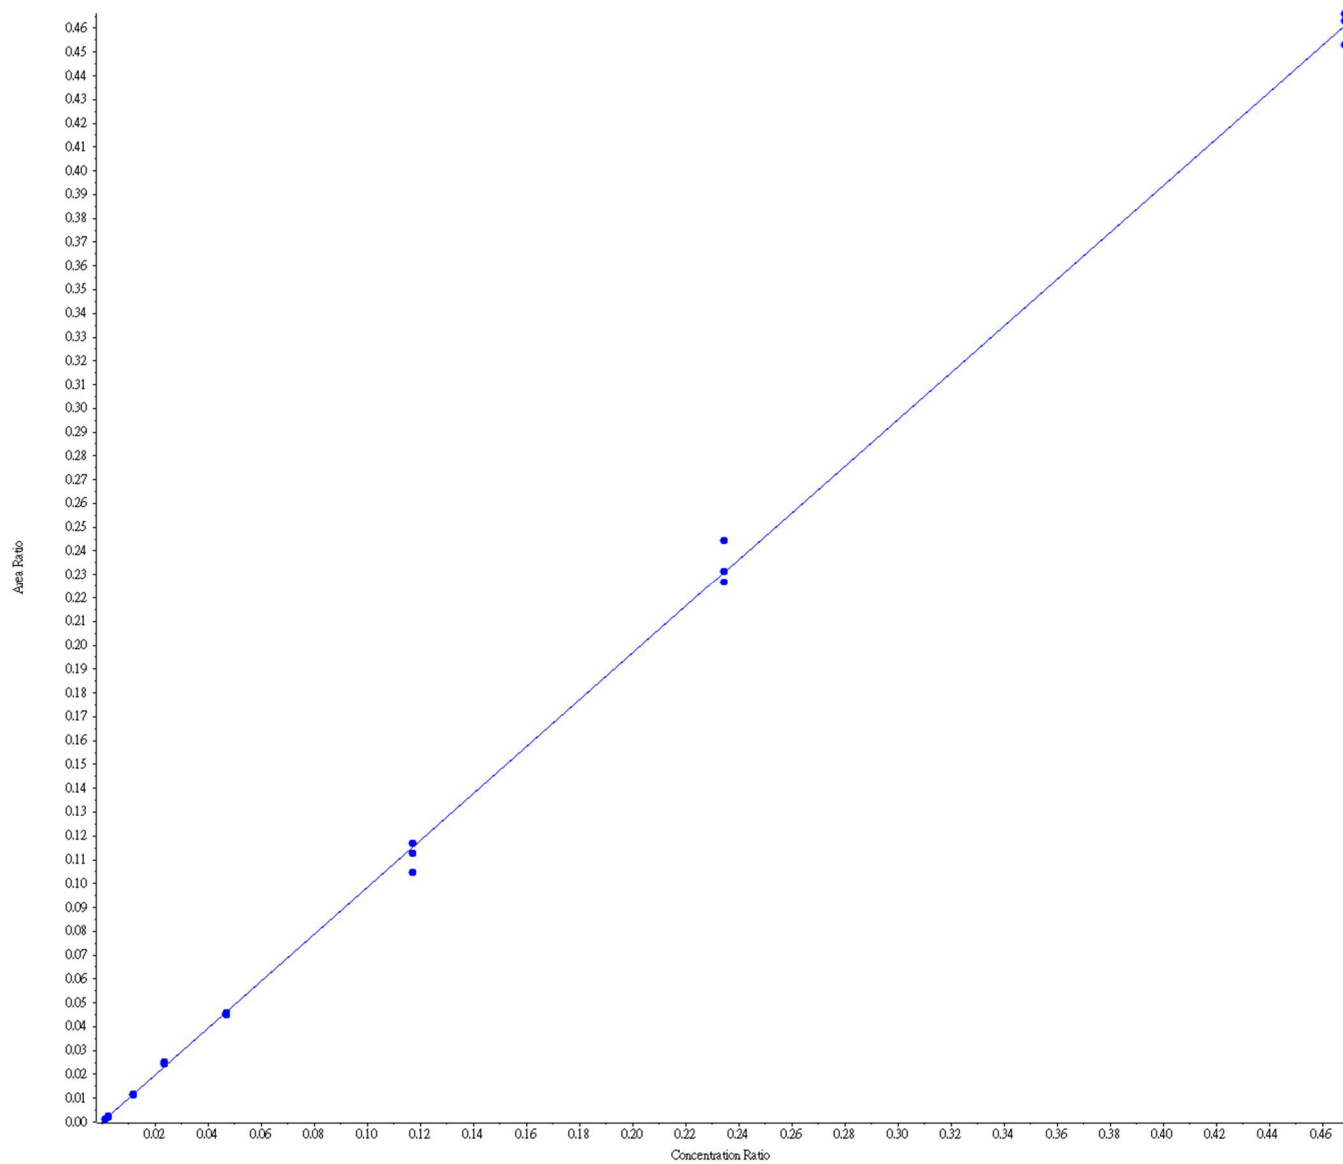



Analyte Name: APOA2.SPELQAEAK.2/y8(2+).M00

Calibration Equation:  $y = 1.04409x + 0.00822$  ( $r = 0.99529$ ) (weighting:  $1/x$ )

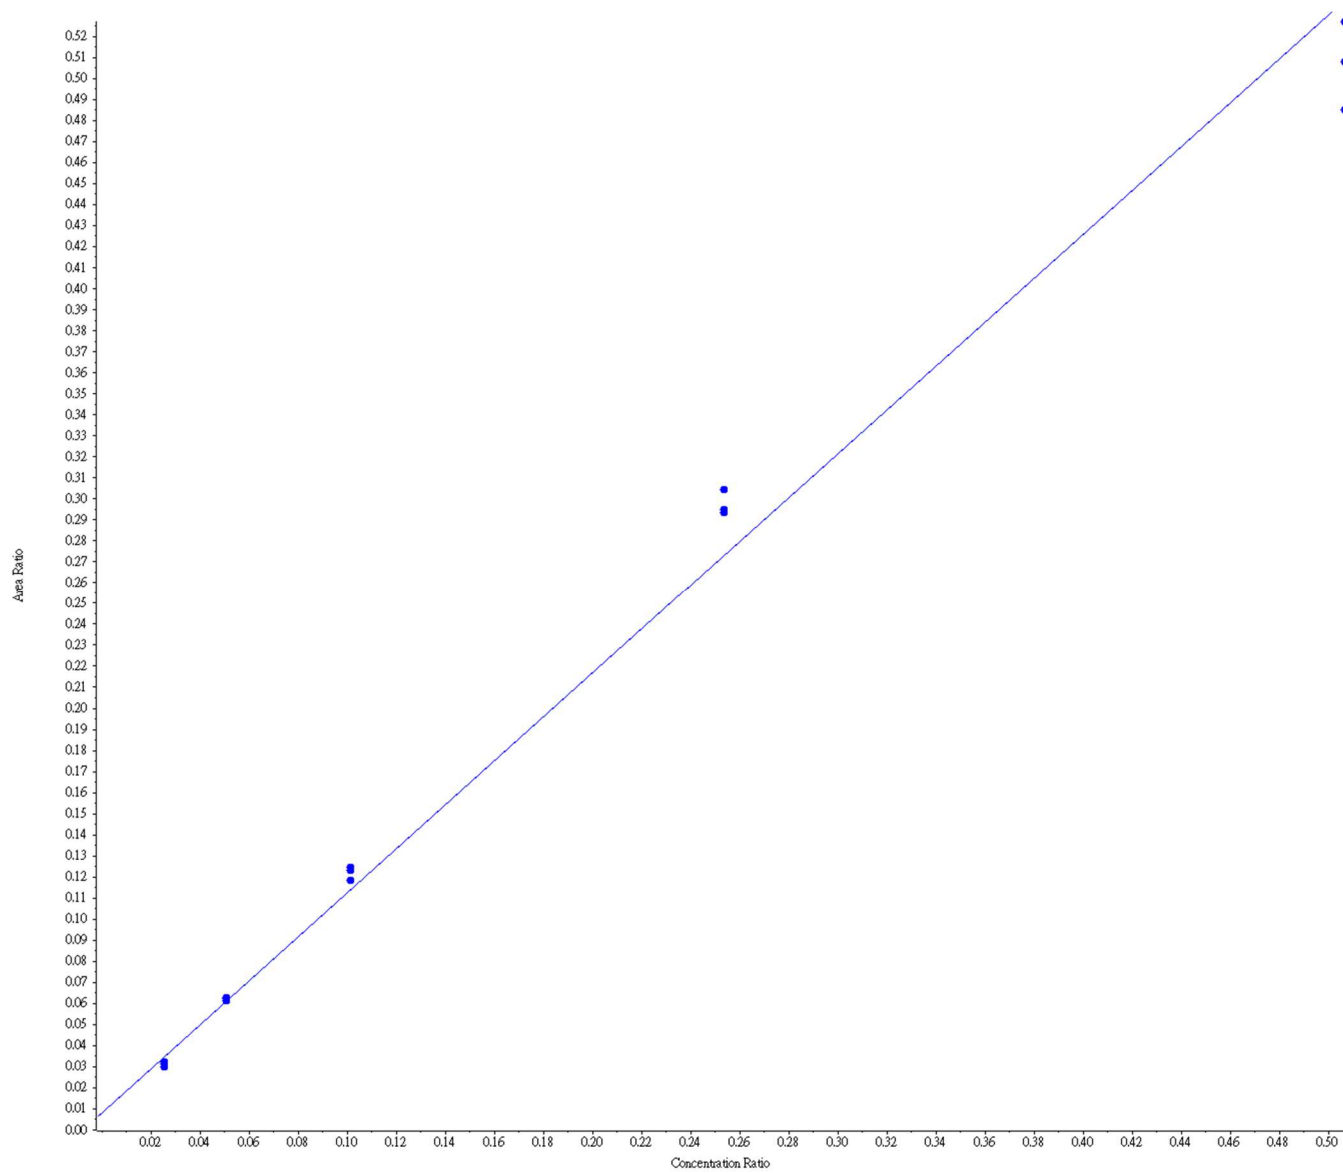

Analyte Name: APOA4.SLAPYAQDTQEK.2/y9(2+).M00

Calibration Equation:  $y = 0.99889x + 0.00457$  ( $r = 0.99132$ ) (weighting:  $1/x$ )

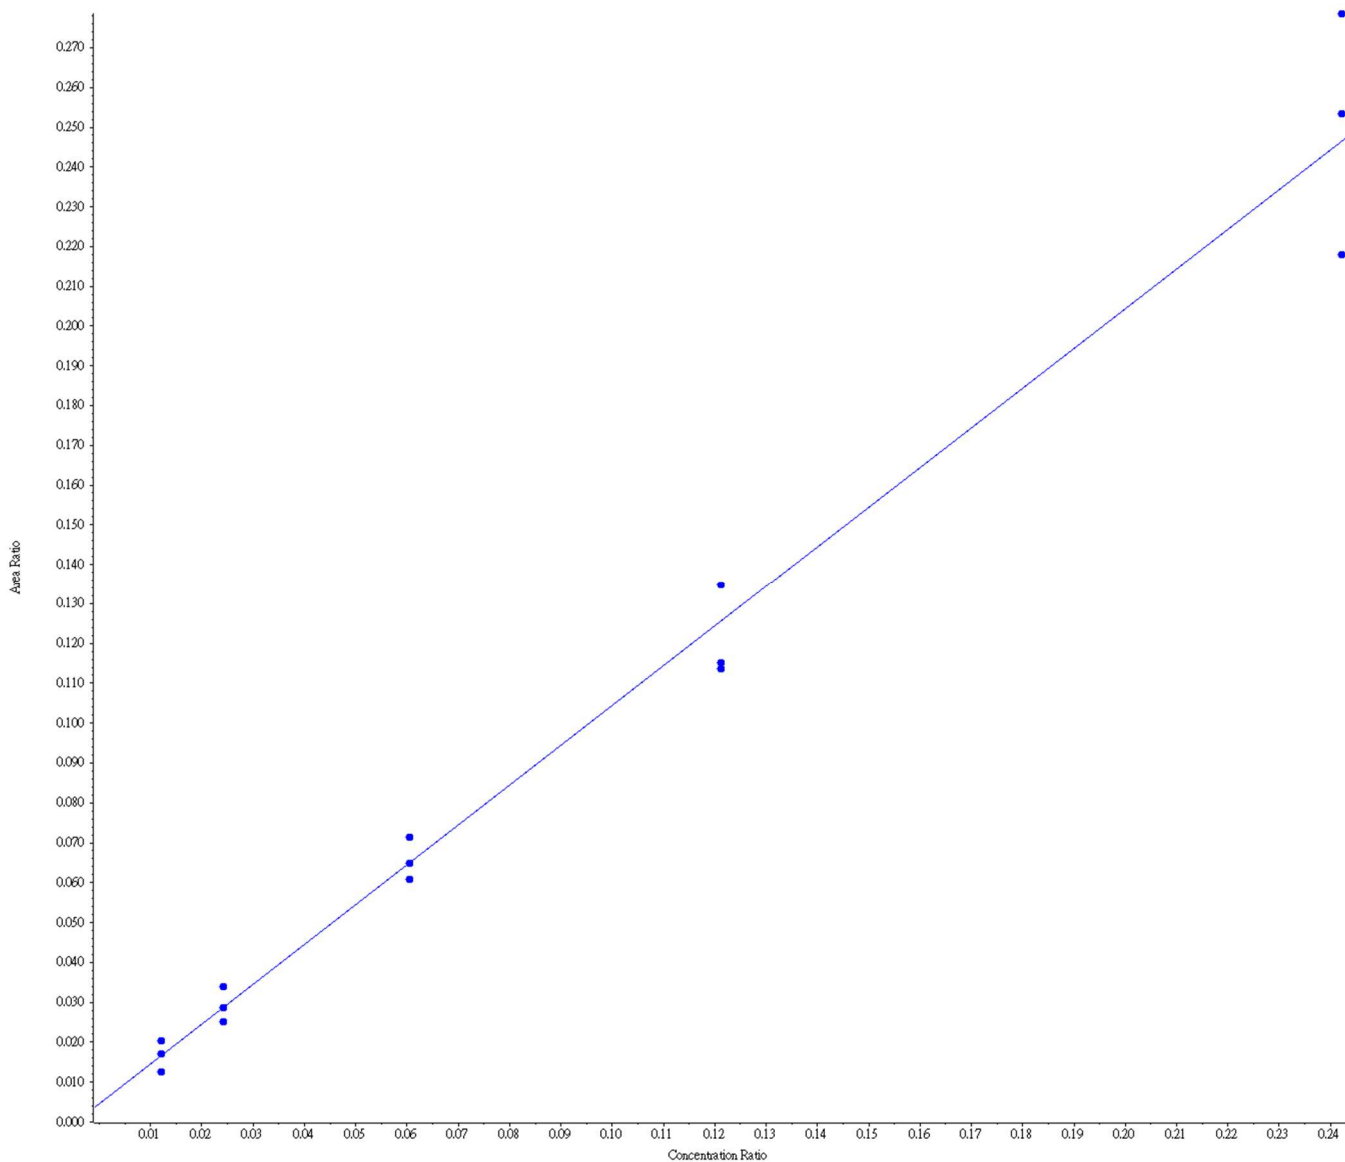

Analyte Name: APOL1.VTEPISAESGEQVER.2/y12(2+).M00

Calibration Equation:  $y = 0.96241 x + -0.00935$  ( $r = 0.97204$ ) (weighting:  $1 / x$ )

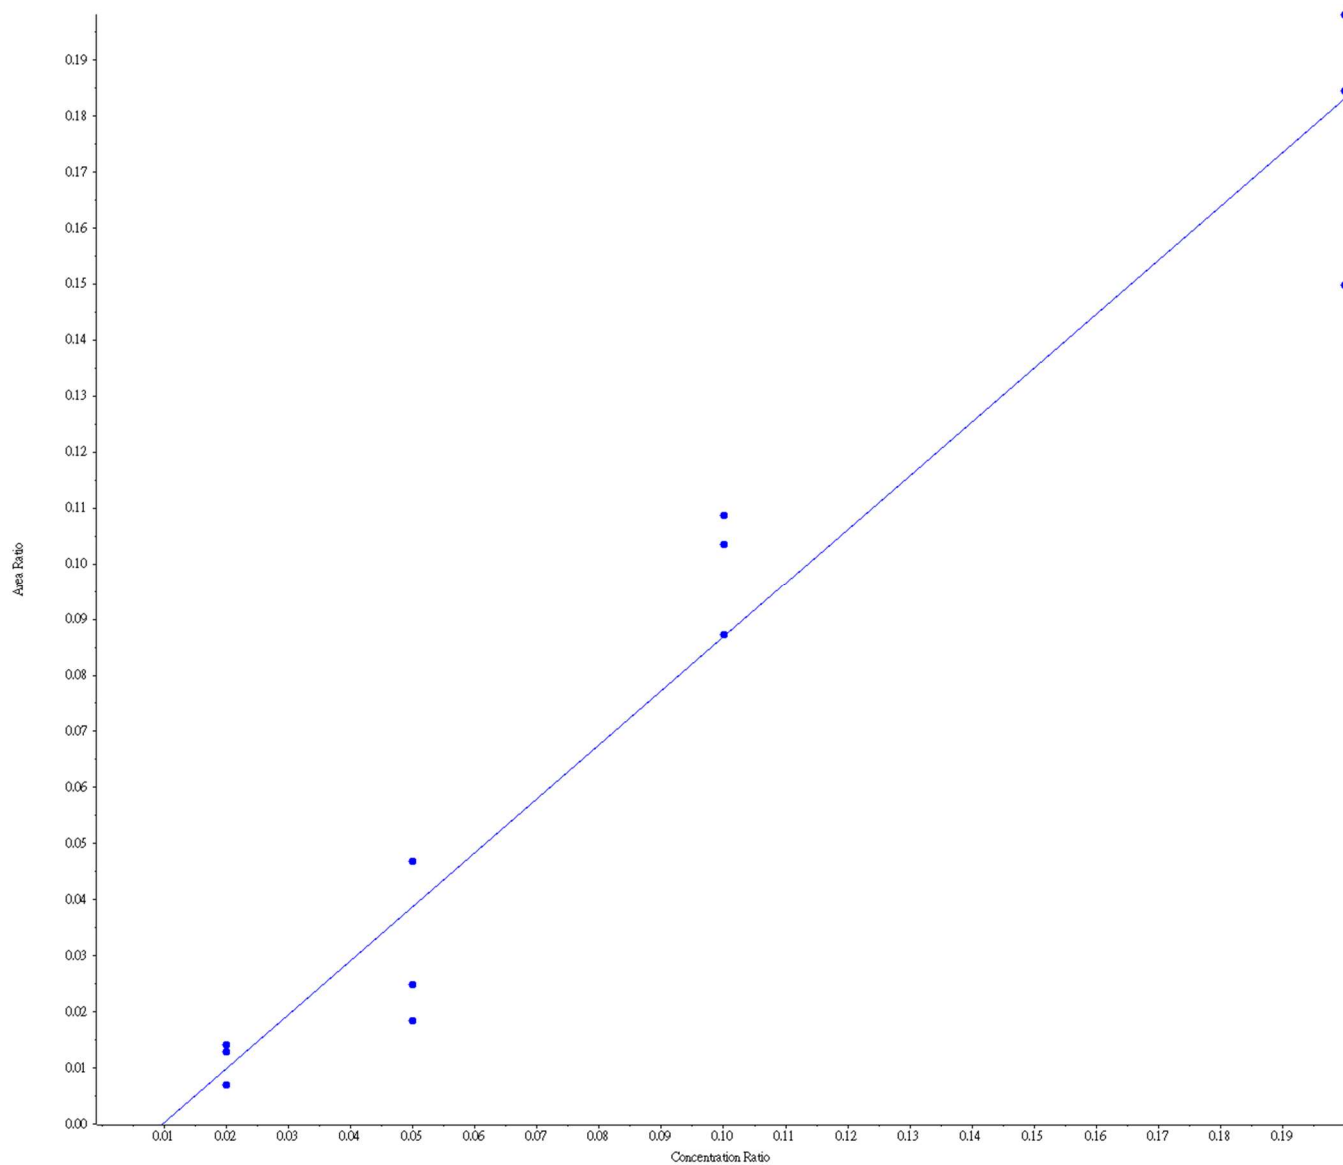

Analyte Name: APOH.ATVVYQGER.2/y6.M00

Calibration Equation:  $y = 1.02064 x + 0.00157$  ( $r = 0.99957$ ) (weighting:  $1 / x$ )

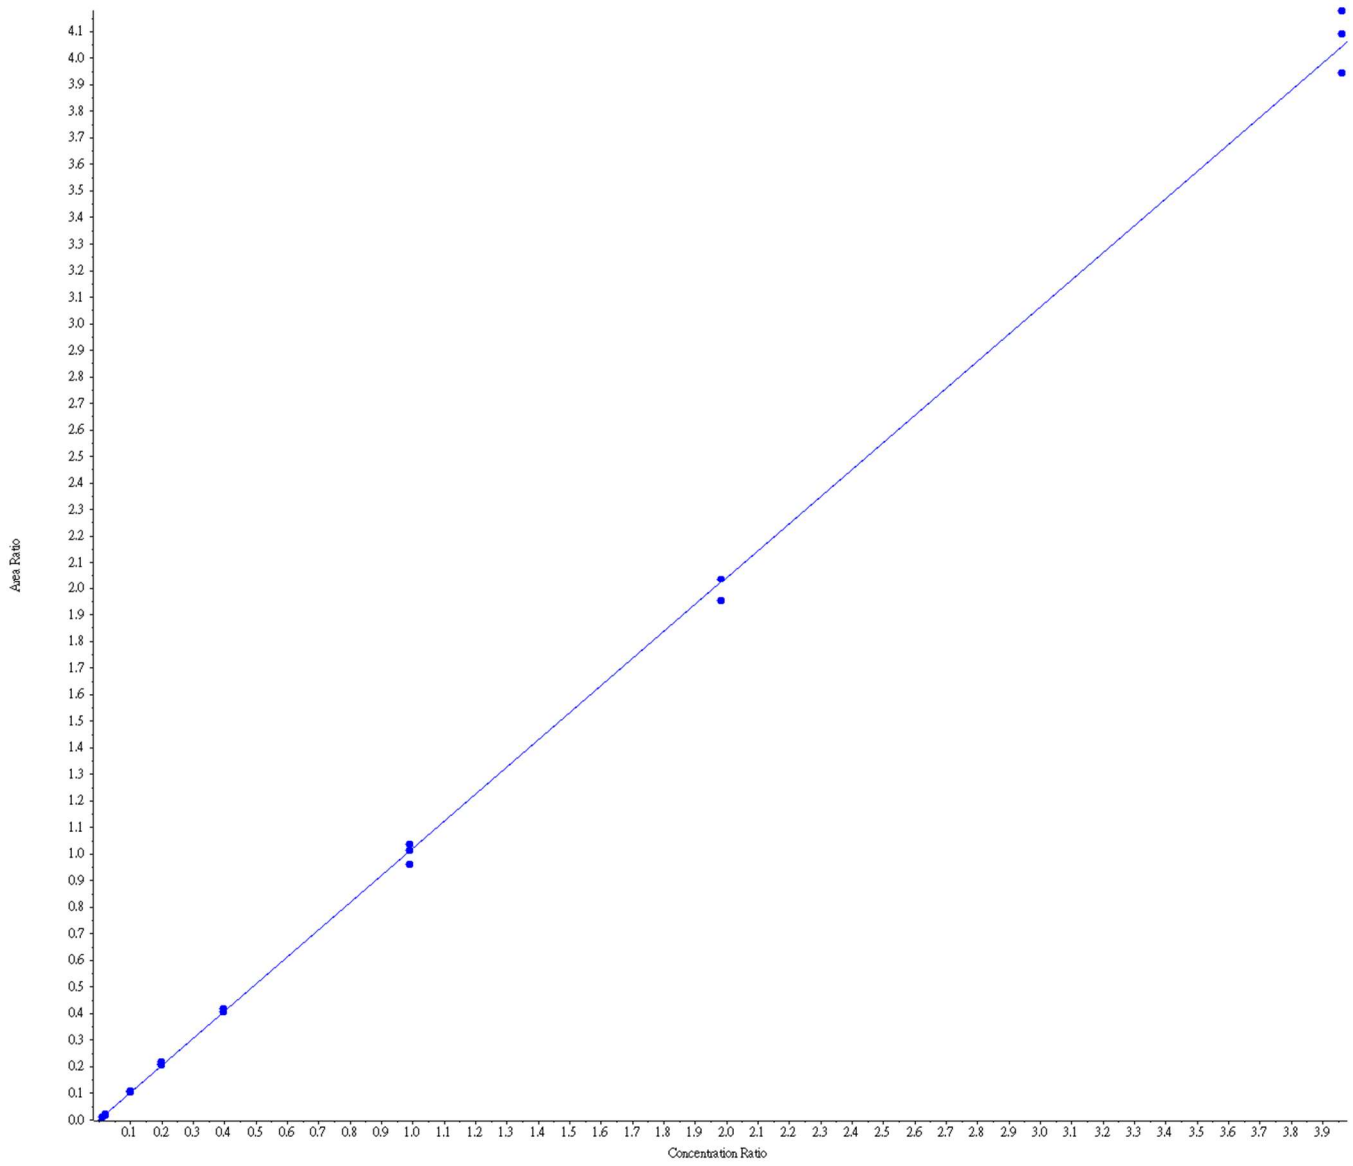

Analyte Name: CO9.TEHYEEQJFAFK.3/b5.M00

Calibration Equation:  $y = 0.95696 x + 0.00105$  ( $r = 0.98030$ ) (weighting:  $1 / x$ )

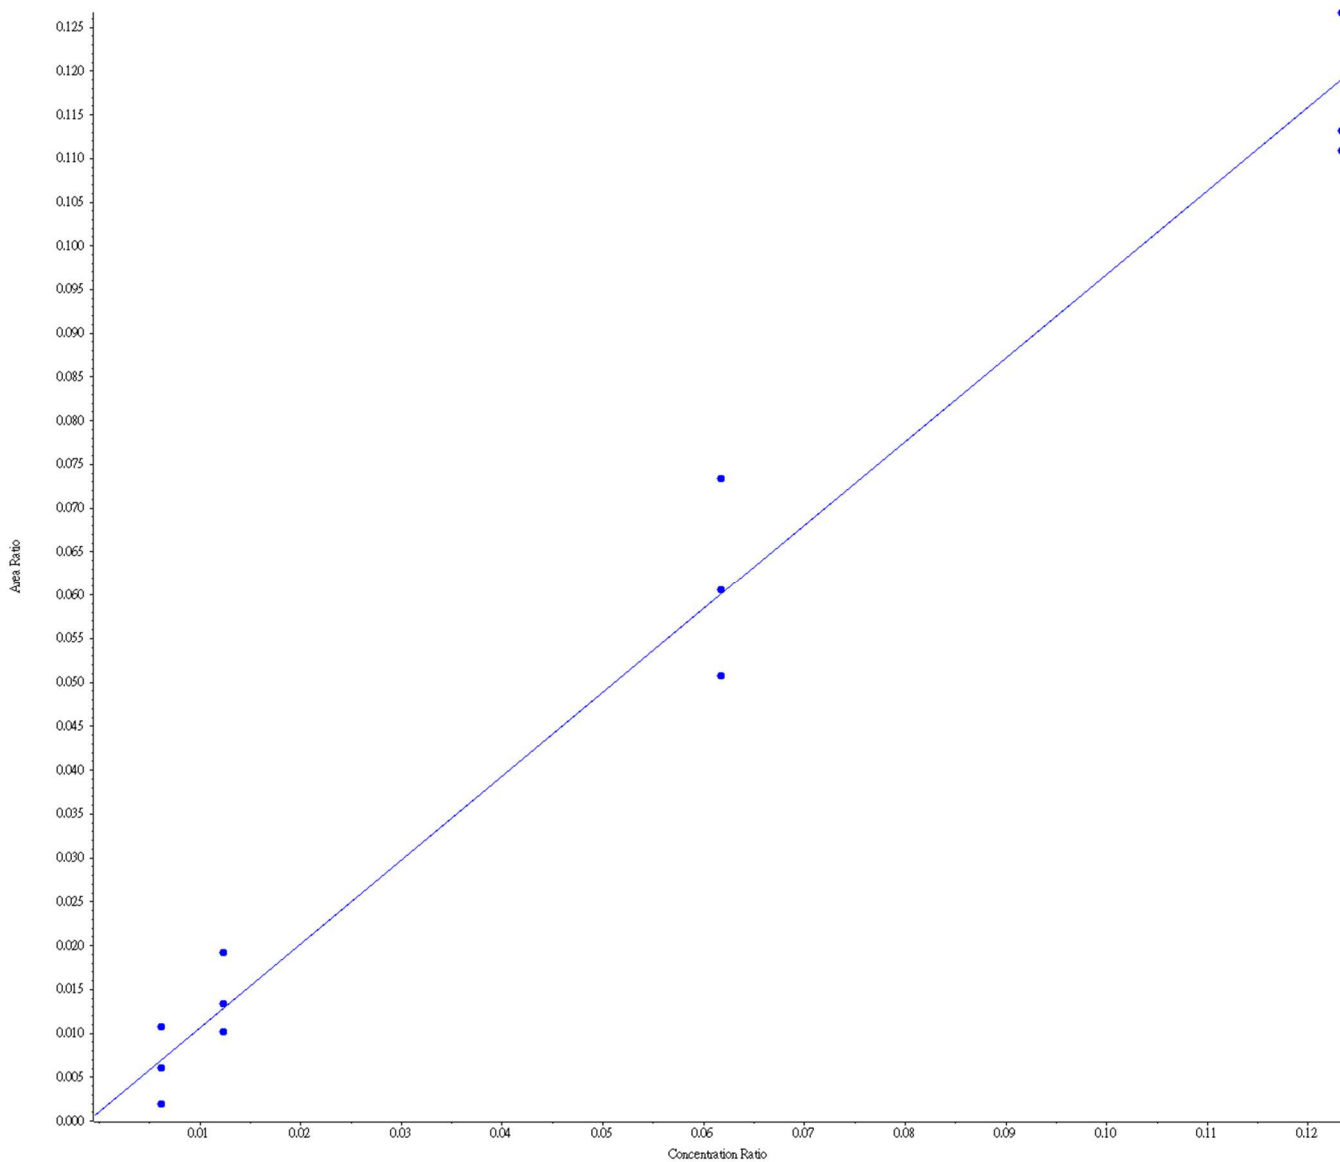

Analyte Name: FIBB.QGFGNVATNTDGK.2/y7.M00

Calibration Equation:  $y = 1.02320 x + 7.59790e-5$  ( $r = 0.99848$ ) (weighting:  $1 / x$ )

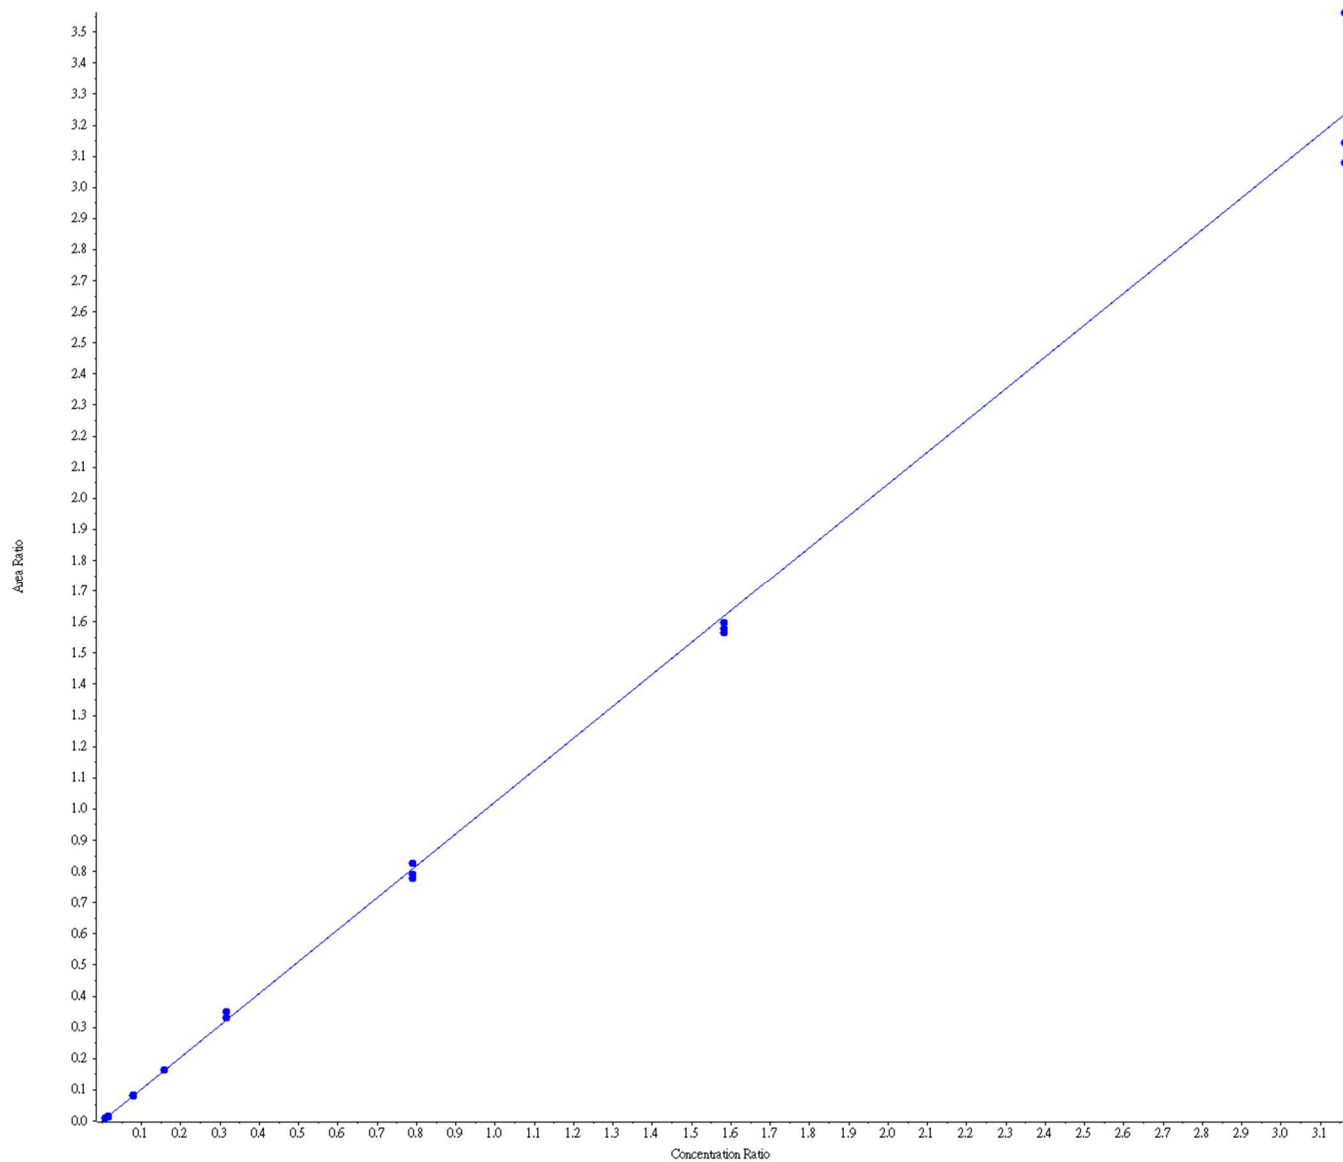

Analyte Name: ITIH1.AAISGENAGLVR.2/y9.M00

Calibration Equation:  $y = 1.01891x + -0.00102$  ( $r = 0.99781$ ) (weighting:  $1/x$ )

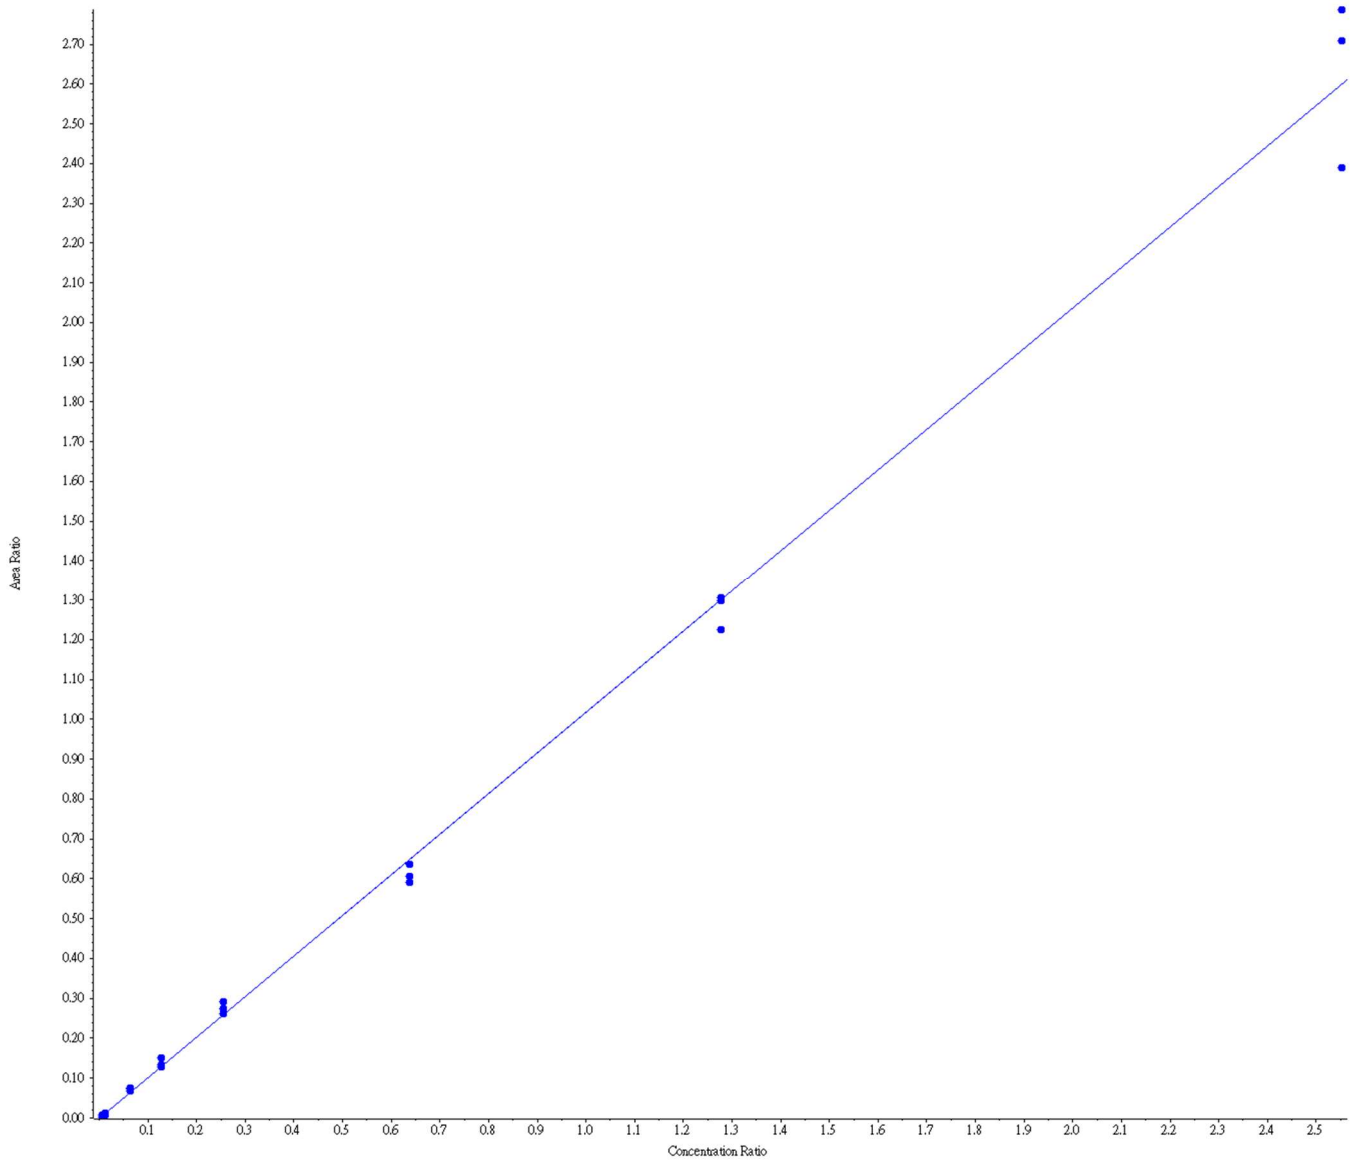

Analyte Name: PLMN.LFLEPTR.2/y5.M00

Calibration Equation:  $y = 0.99955x + 4.11239e-5$  ( $r = 0.99900$ ) (weighting:  $1/x$ )

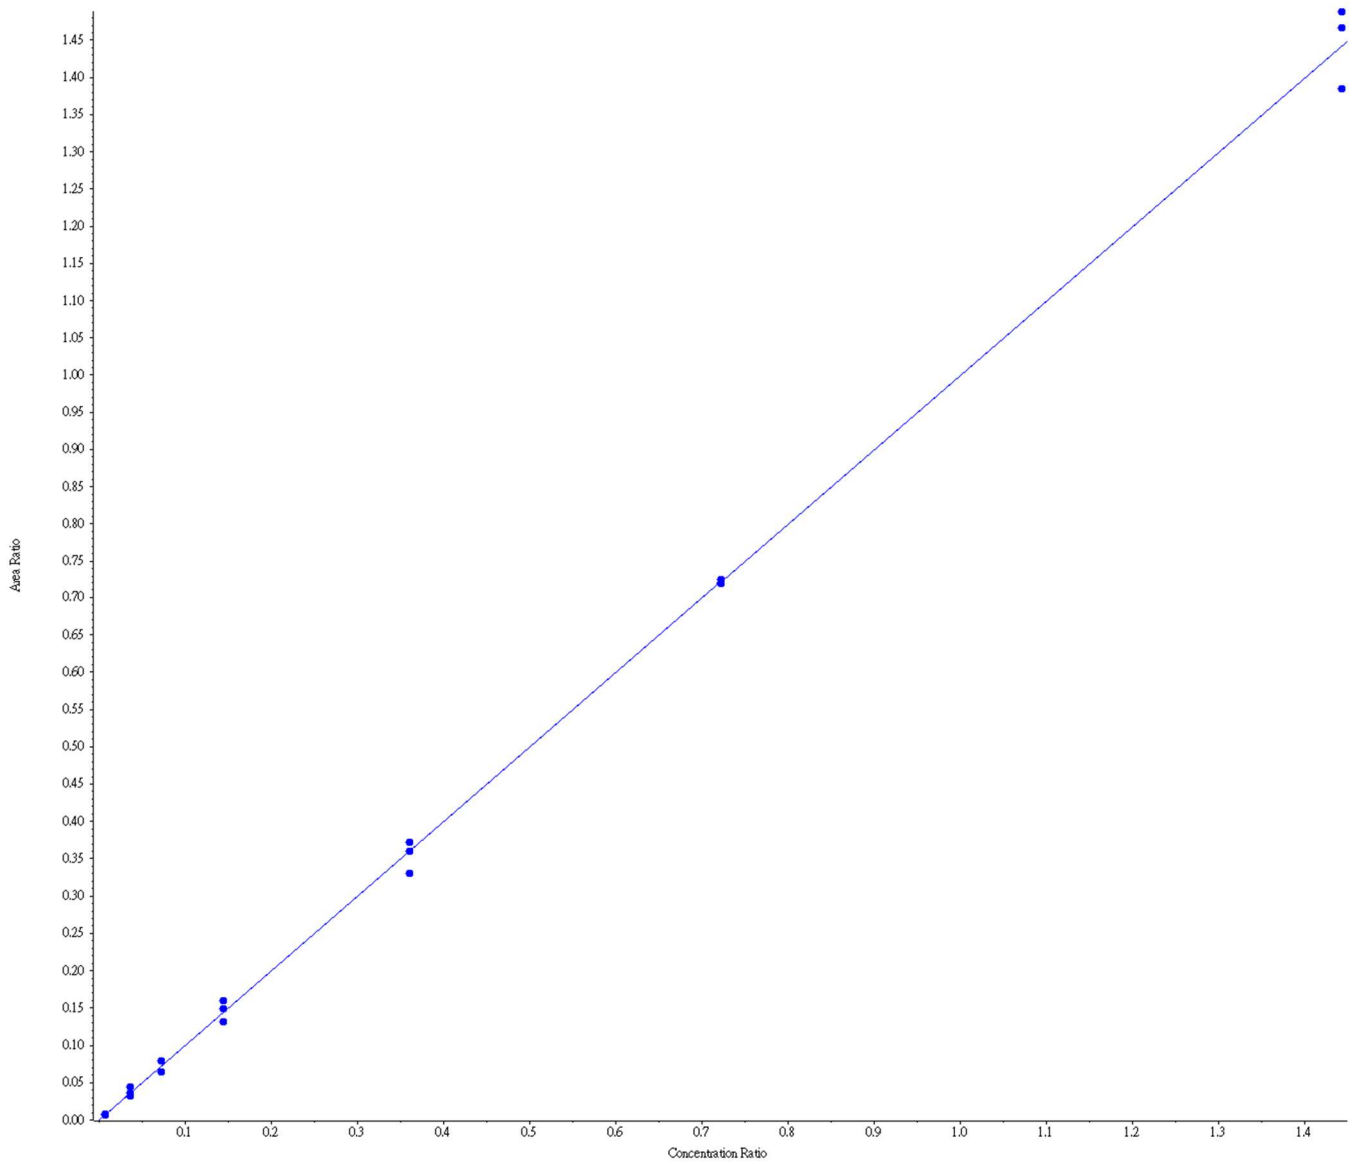



Analyte Name: THRB.ETAASLLQAGYK.2/y8.M00

Calibration Equation:  $y = 1.19617x + -0.00189$  ( $r = 0.91662$ ) (weighting:  $1/x$ )

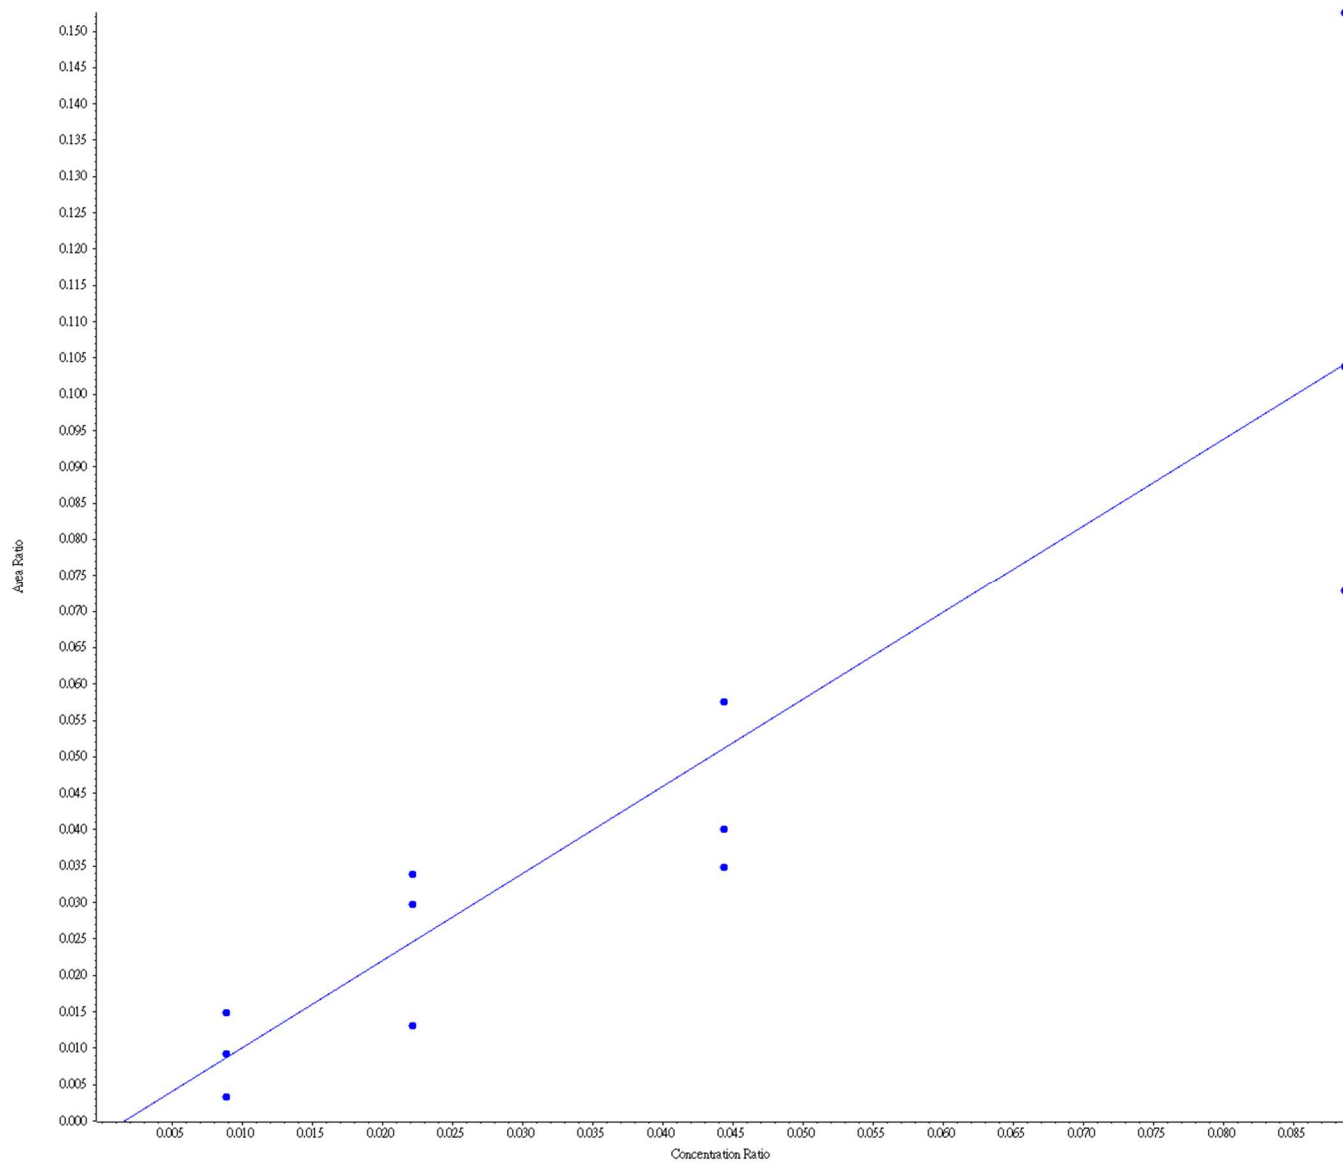

Analyte Name: SAA4.GPGGVWAAK.2/y8(2+).M00

Calibration Equation:  $y = 1.05874 x + 0.00846$  ( $r = 0.99524$ ) (weighting:  $1 / x$ )

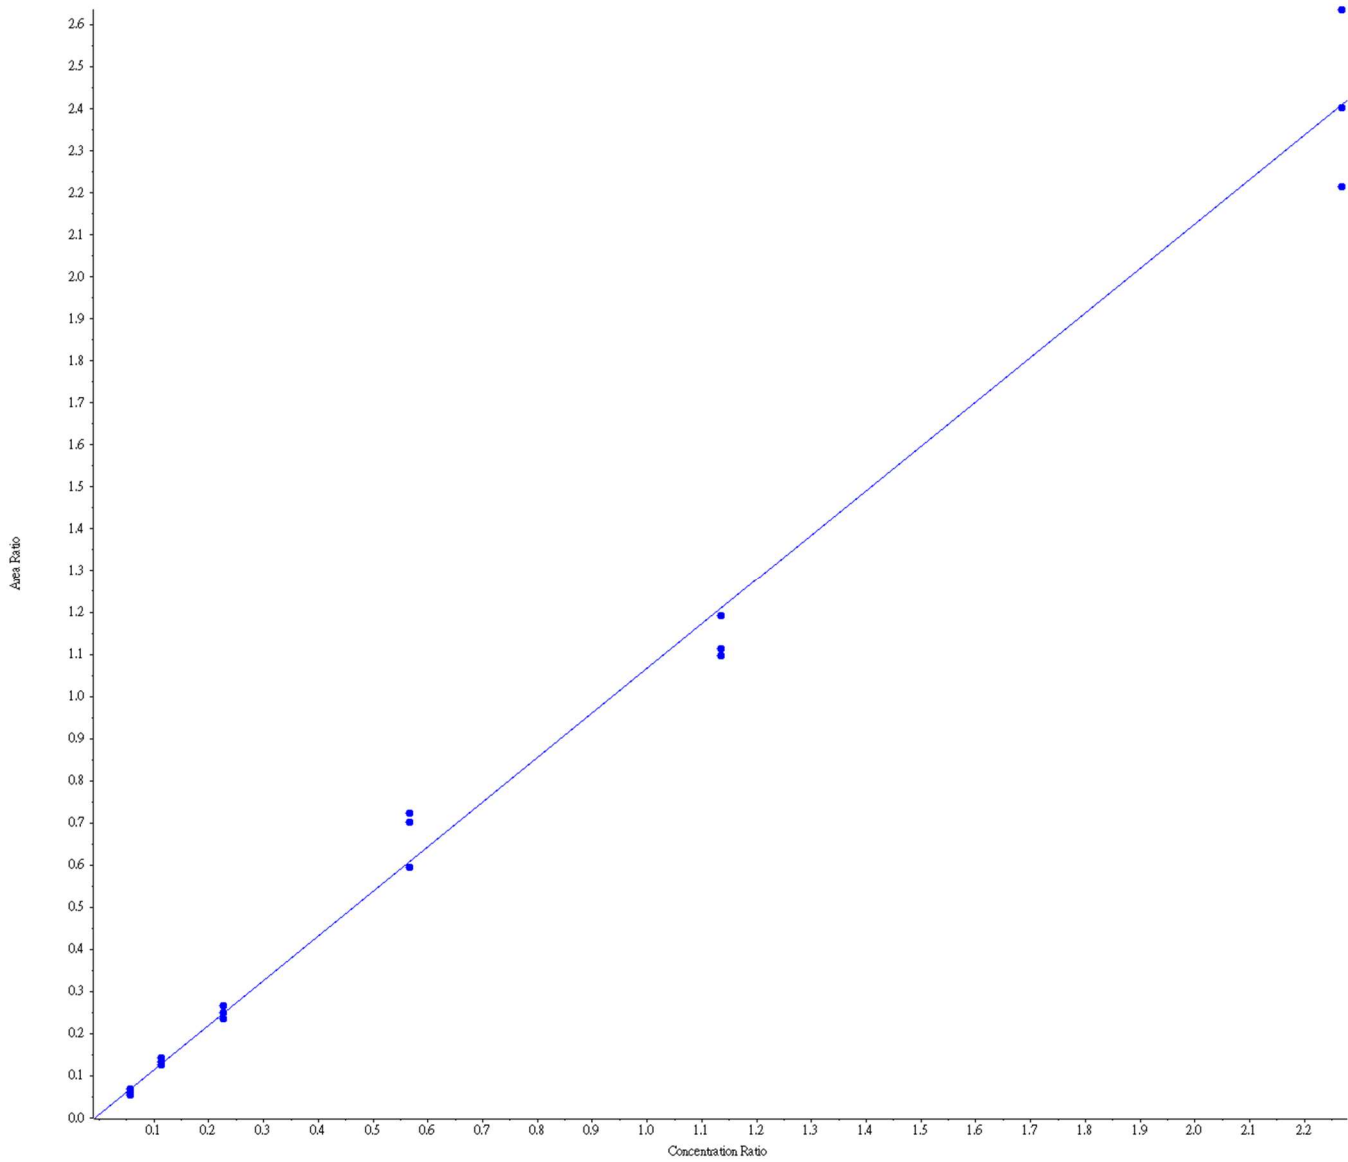

Analyte Name: TSP1.FVFGTTPEDILR.2/y6.M00

Calibration Equation:  $y = 1.04416x + -0.00372$  ( $r = 0.99609$ ) (weighting:  $1/x$ )

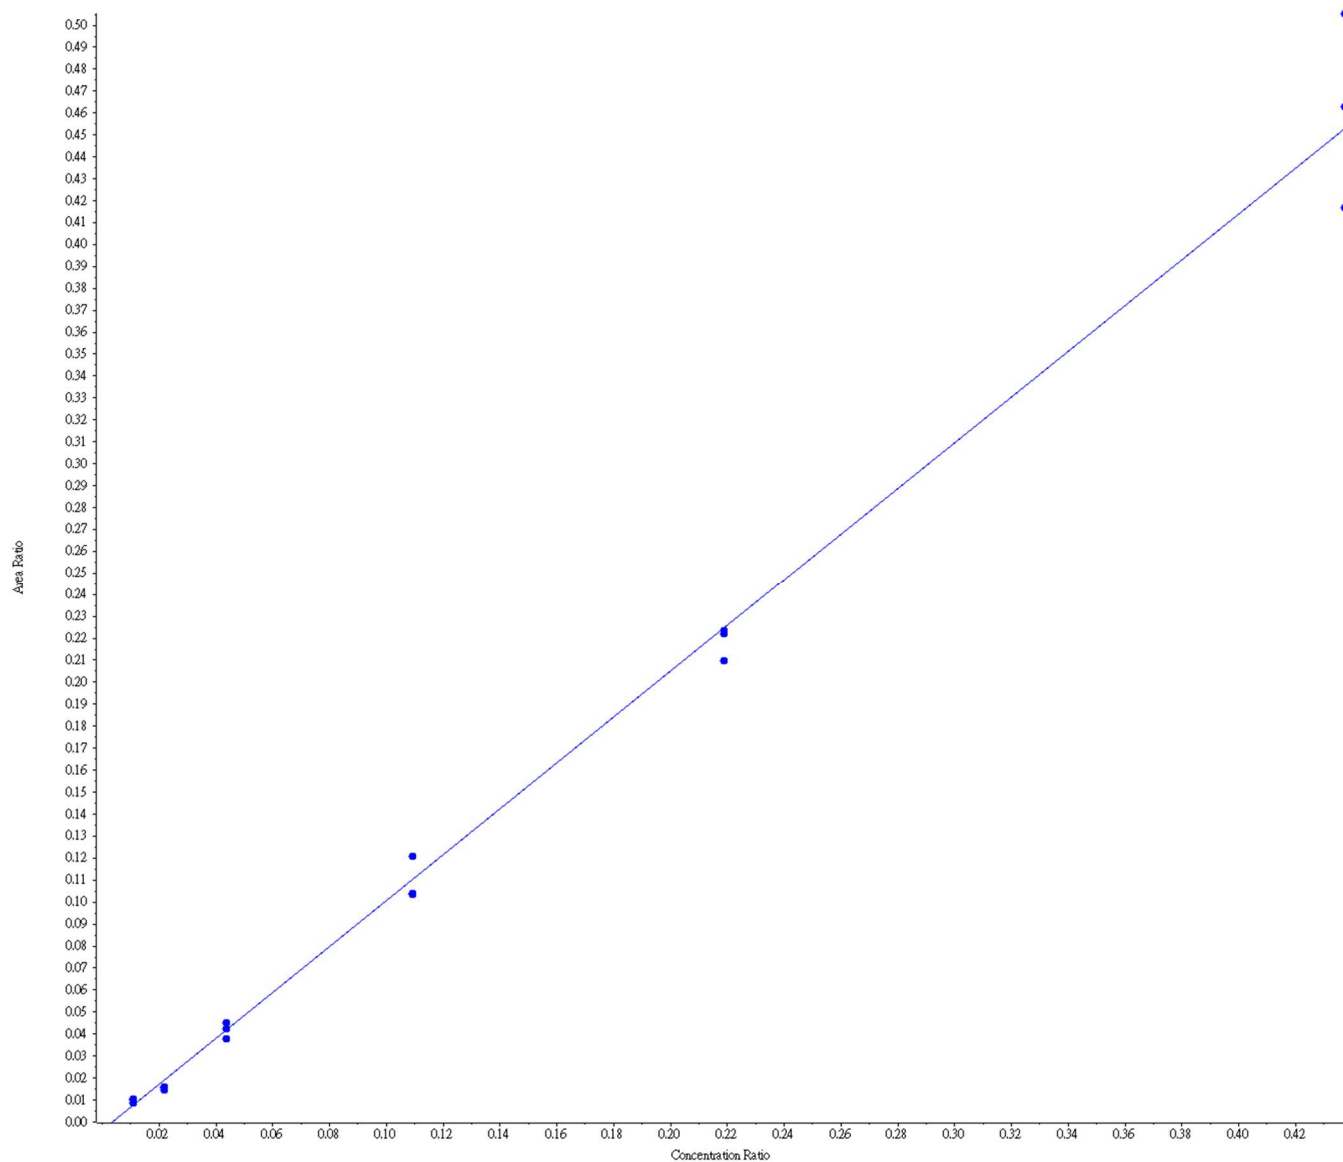

Analyte Name: TRFE.EGYGYTGAFR.2/y7.M00

Calibration Equation:  $y = 1.00030 x + 0.00117$  ( $r = 0.99900$ ) (weighting:  $1 / x$ )

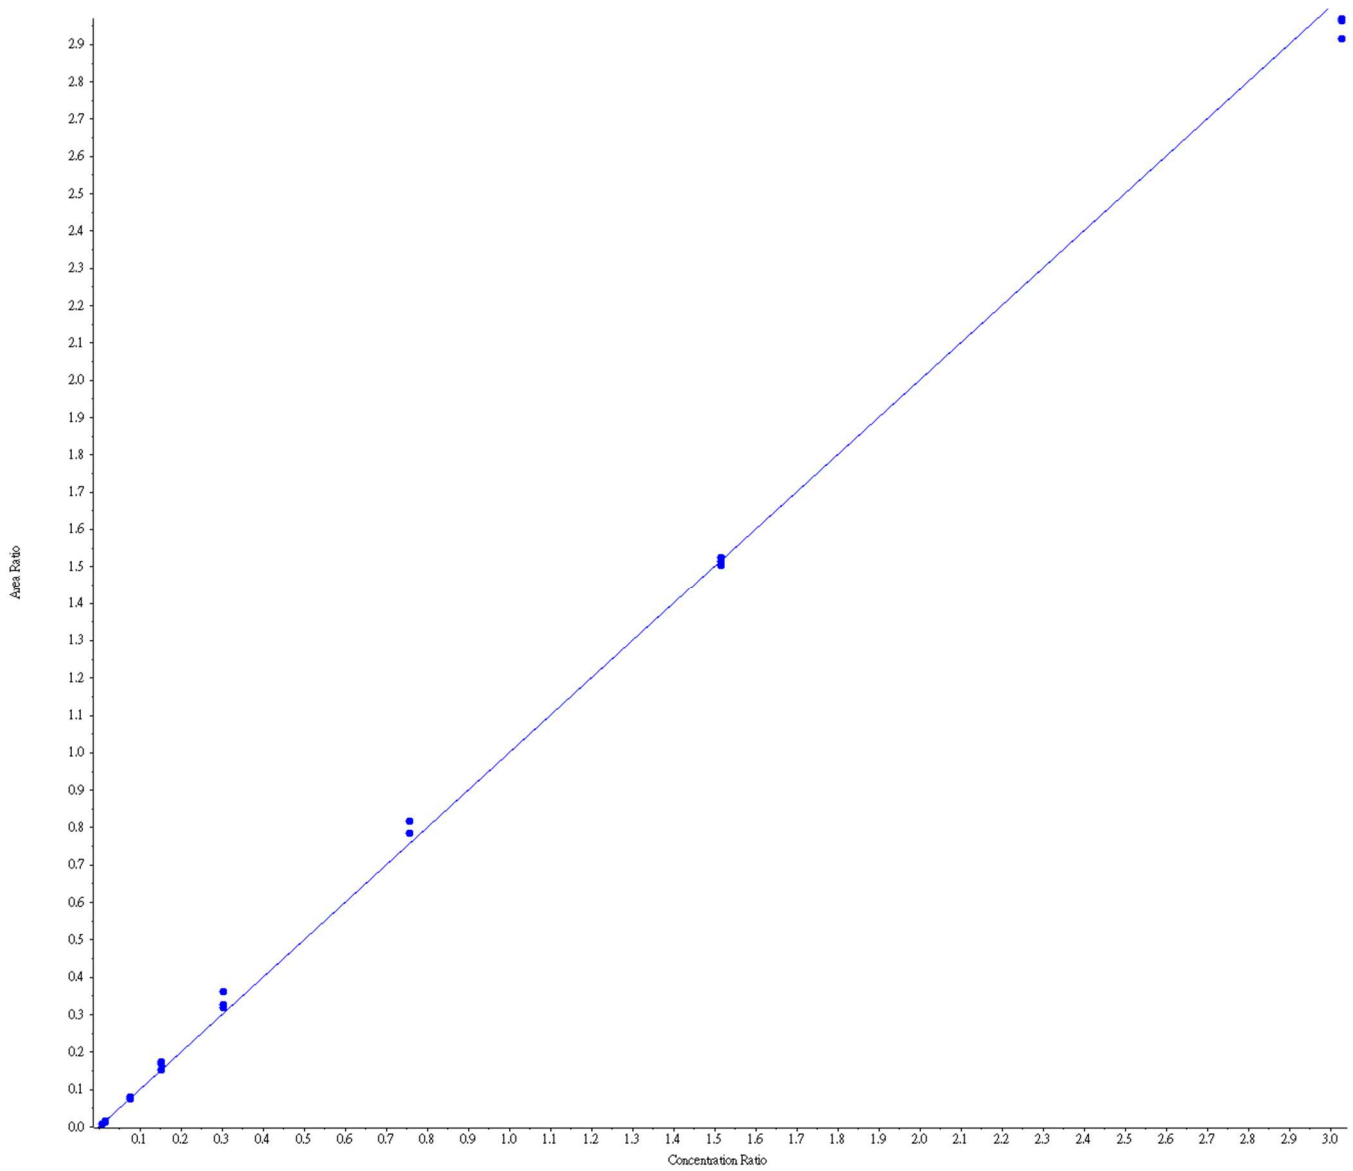

Analyte Name: A1AG1.NWGLSVYADKPETTK.3/y13(2+).M00

Calibration Equation:  $y = 0.98917 x + -0.02385$  ( $r = 0.99924$ ) (weighting:  $1 / x$ )

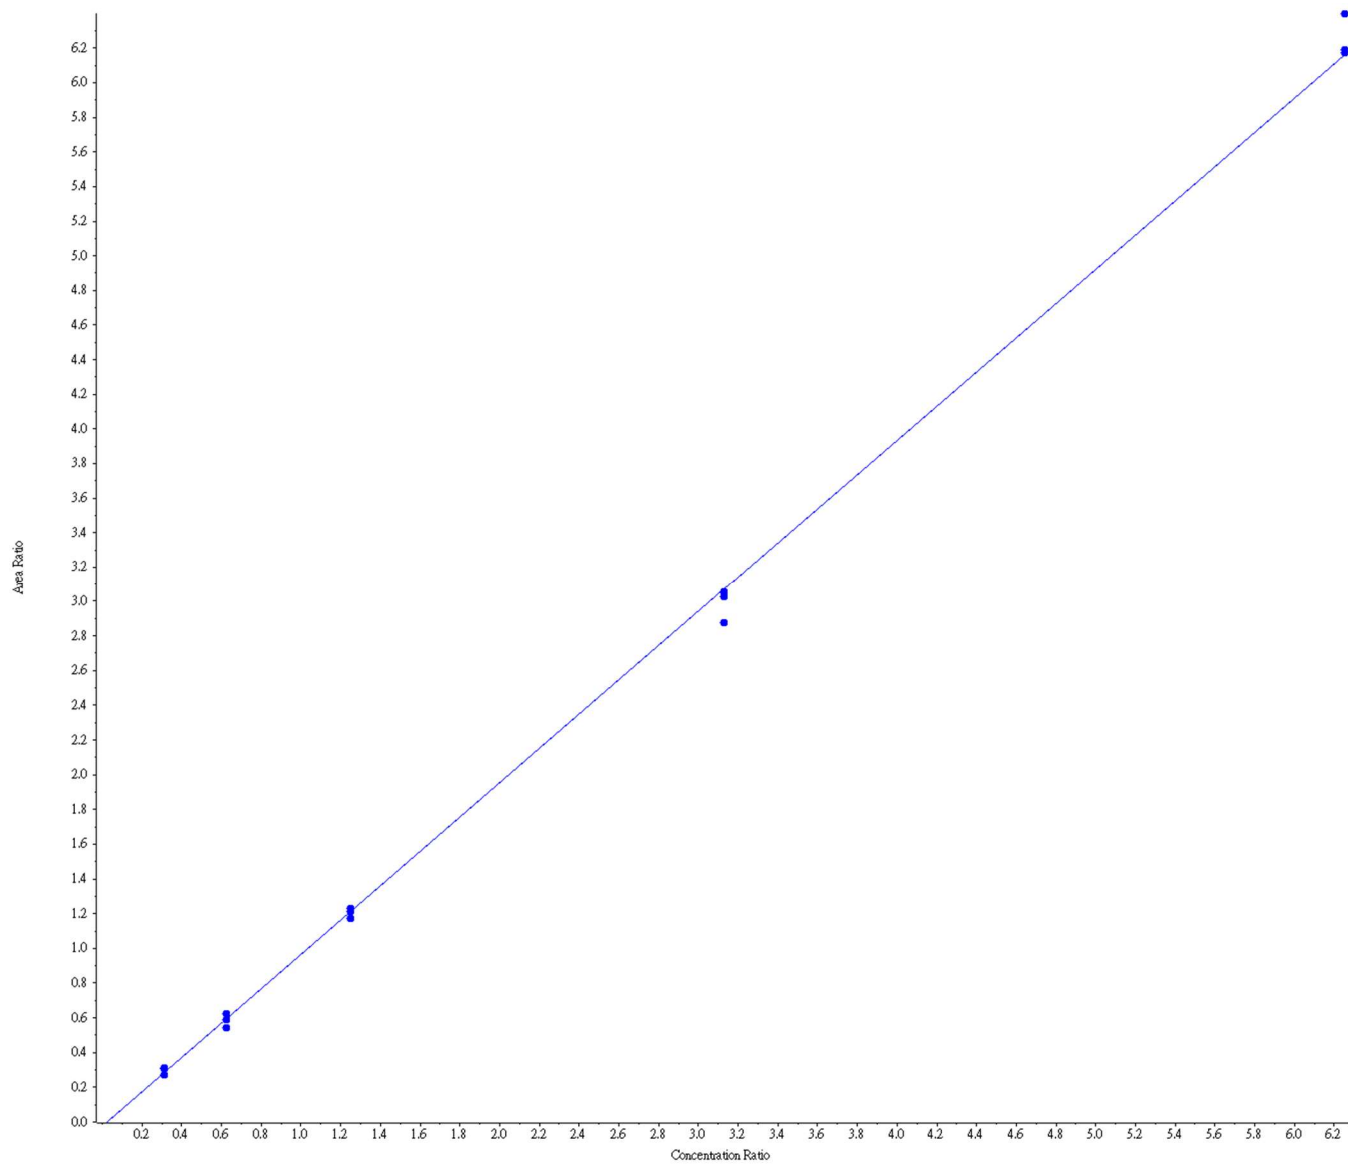

Analyte Name: A2MG.TEHPFTVEEFVLPK.3/y6.M00

Calibration Equation:  $y = 0.99264 x + -0.00285$  ( $r = 0.99945$ ) (weighting:  $1 / x$ )

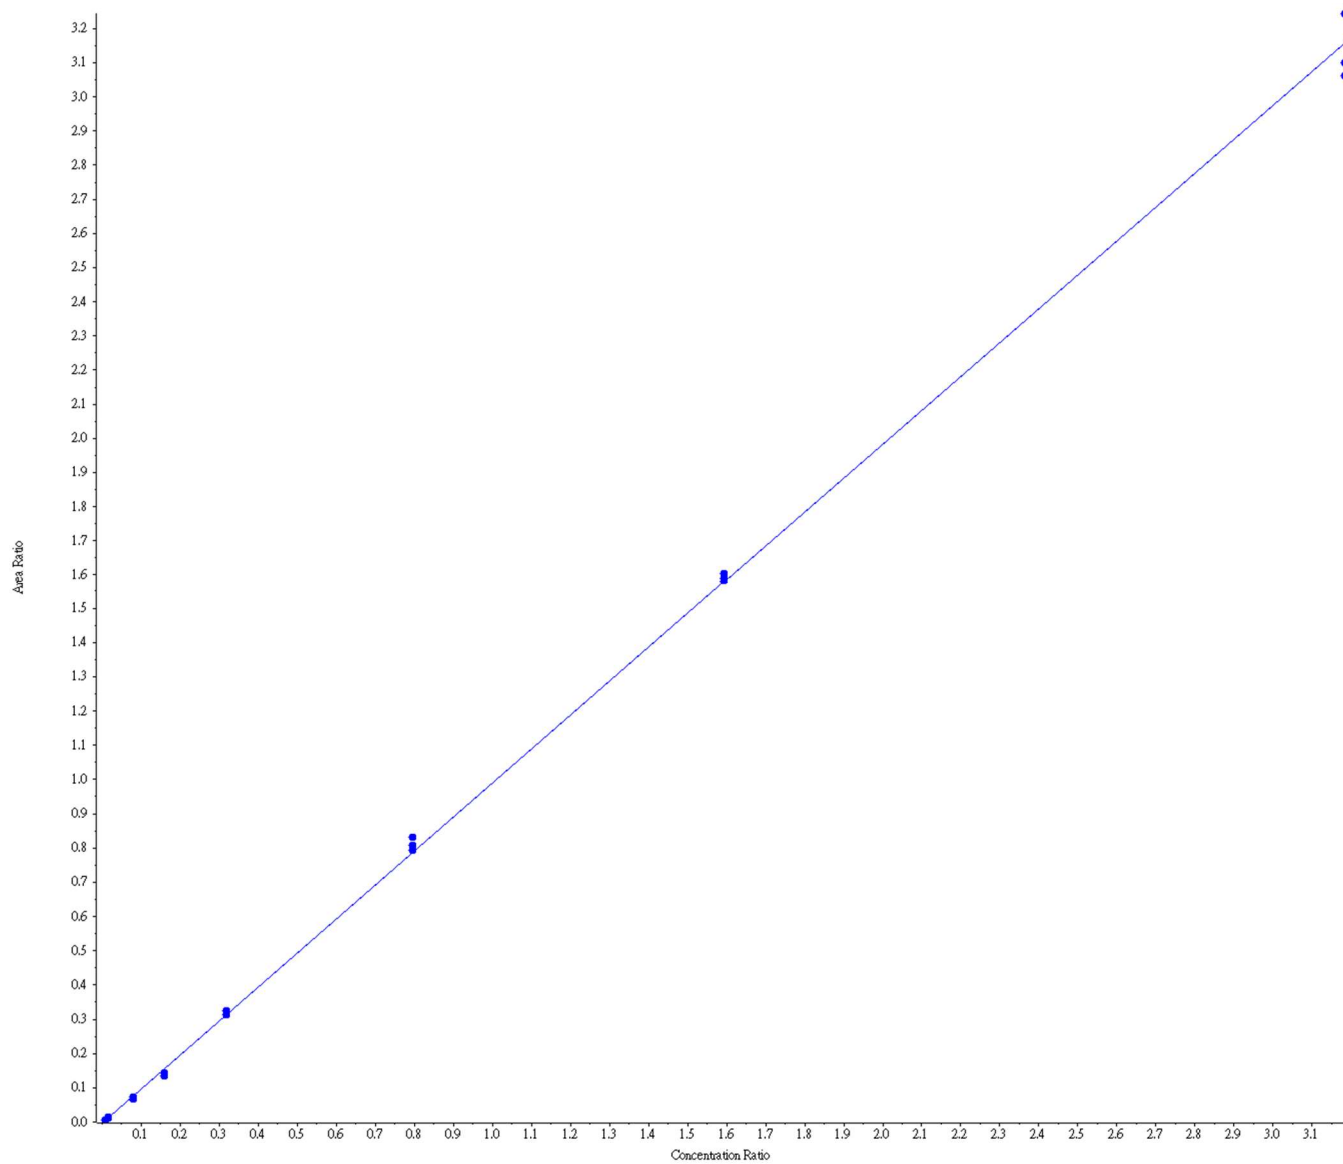

Analyte Name: ANT3.DDLVSDAFHK.2/y6.M00

Calibration Equation:  $y = 1.00689x + 0.00240$  ( $r = 0.99613$ ) (weighting:  $1/x$ )

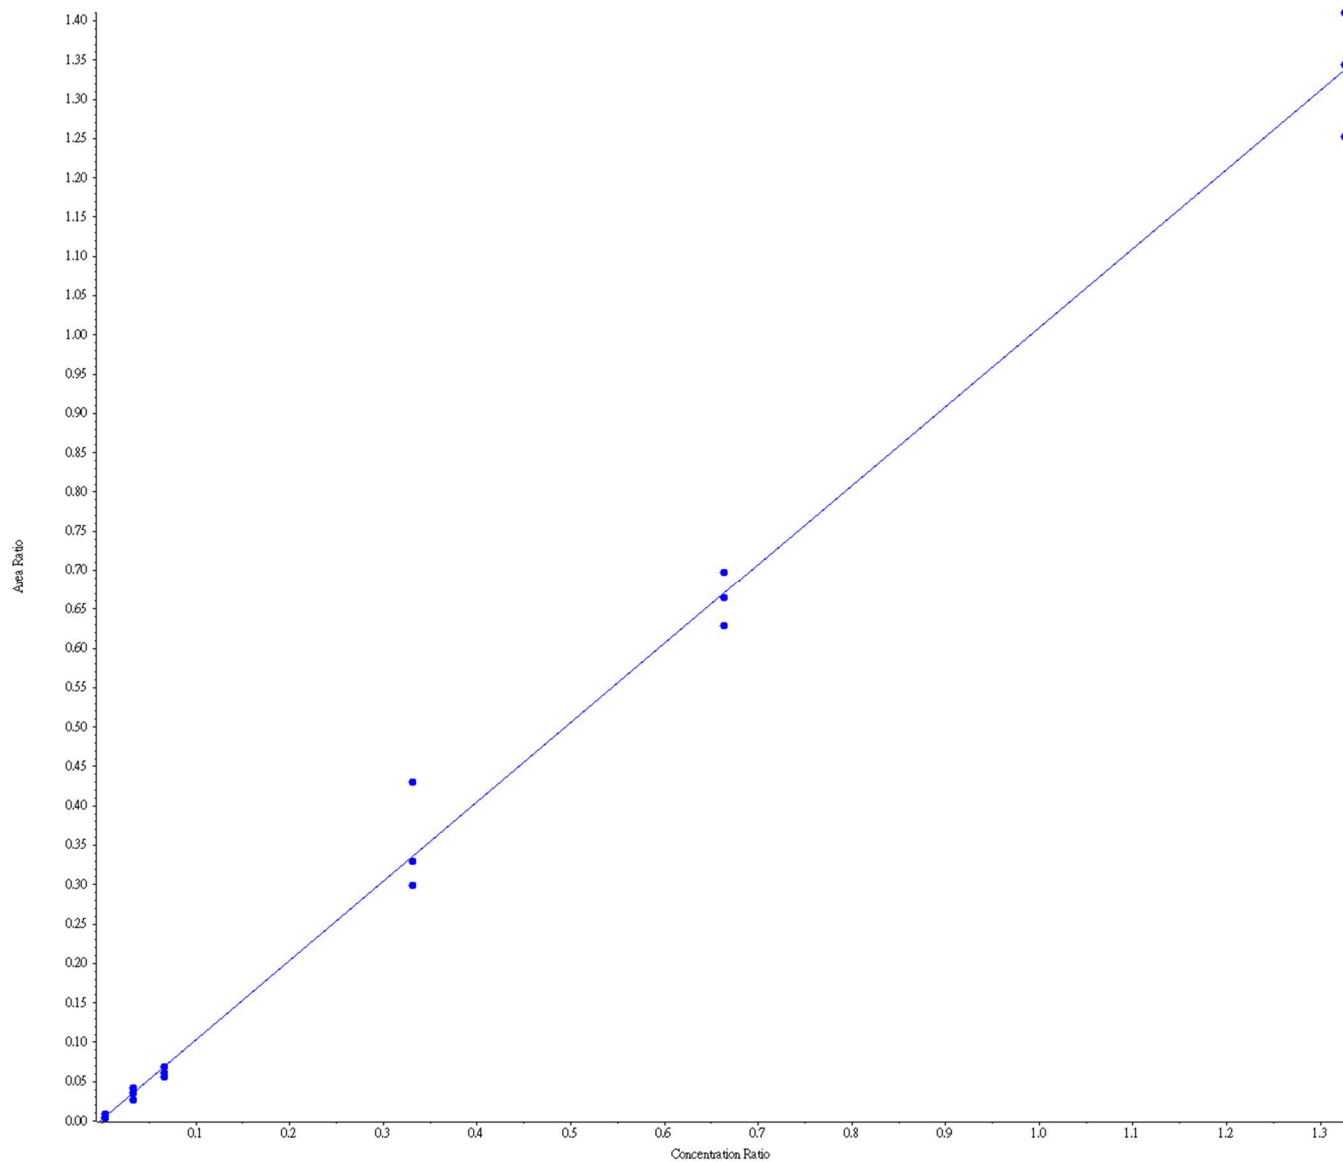

Analyte Name: APOB.FPEVDVLTk.2/y8(2+).M00

Calibration Equation:  $y = 1.20324 x + -1.46867e-4$  (r = 0.98558) (weighting: 1 / x)

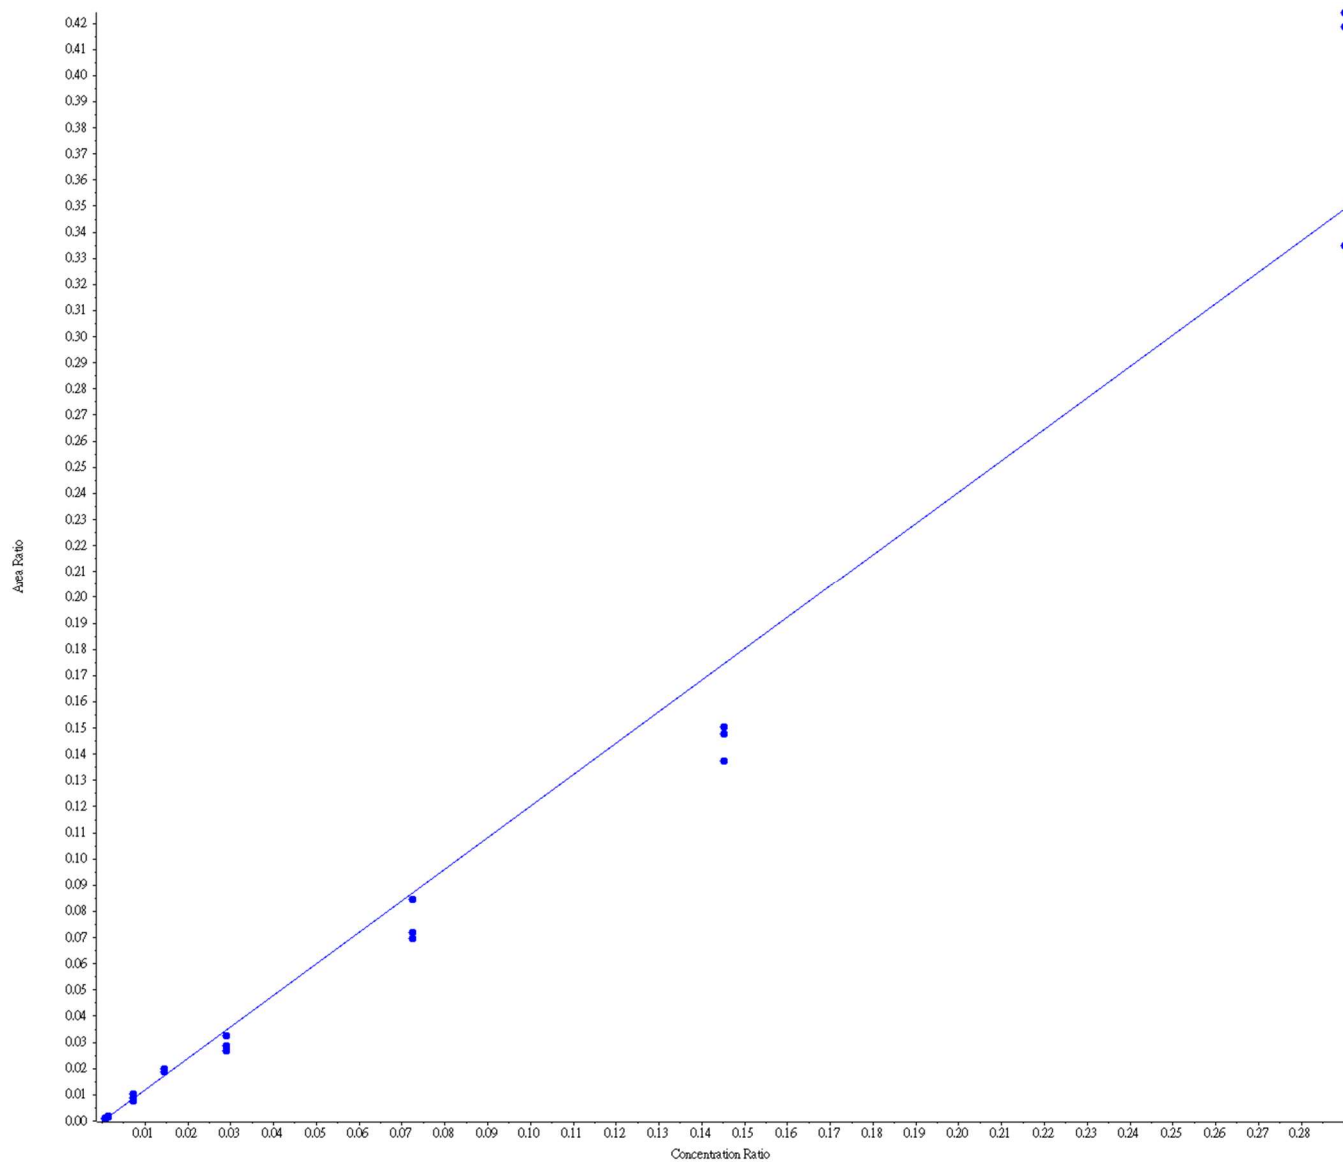



Analyte Name: CERU.EYTDASFTNR.2/y4.M00

Calibration Equation:  $y = 0.99644 x + -0.00190$  ( $r = 0.99721$ ) (weighting:  $1 / x$ )

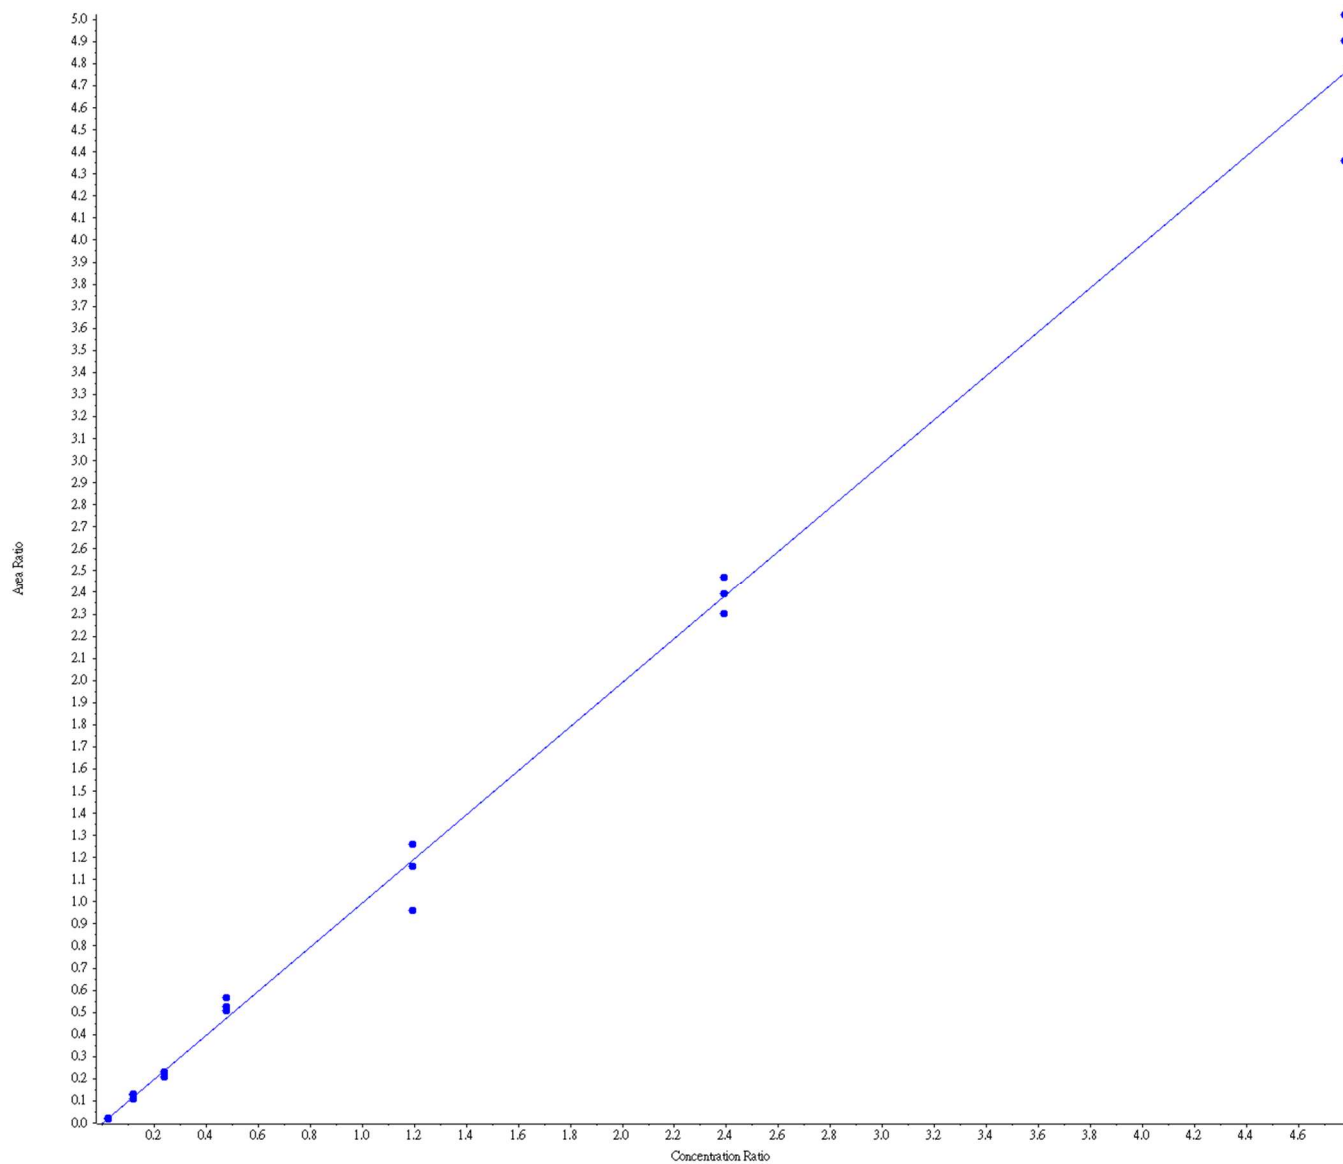

Analyte Name: FIBA.GSESGIFTNTK.2/y5.M00

Calibration Equation:  $y = 0.97316x + -4.80402e-4$  ( $r = 0.99853$ ) (weighting:  $1/x$ )

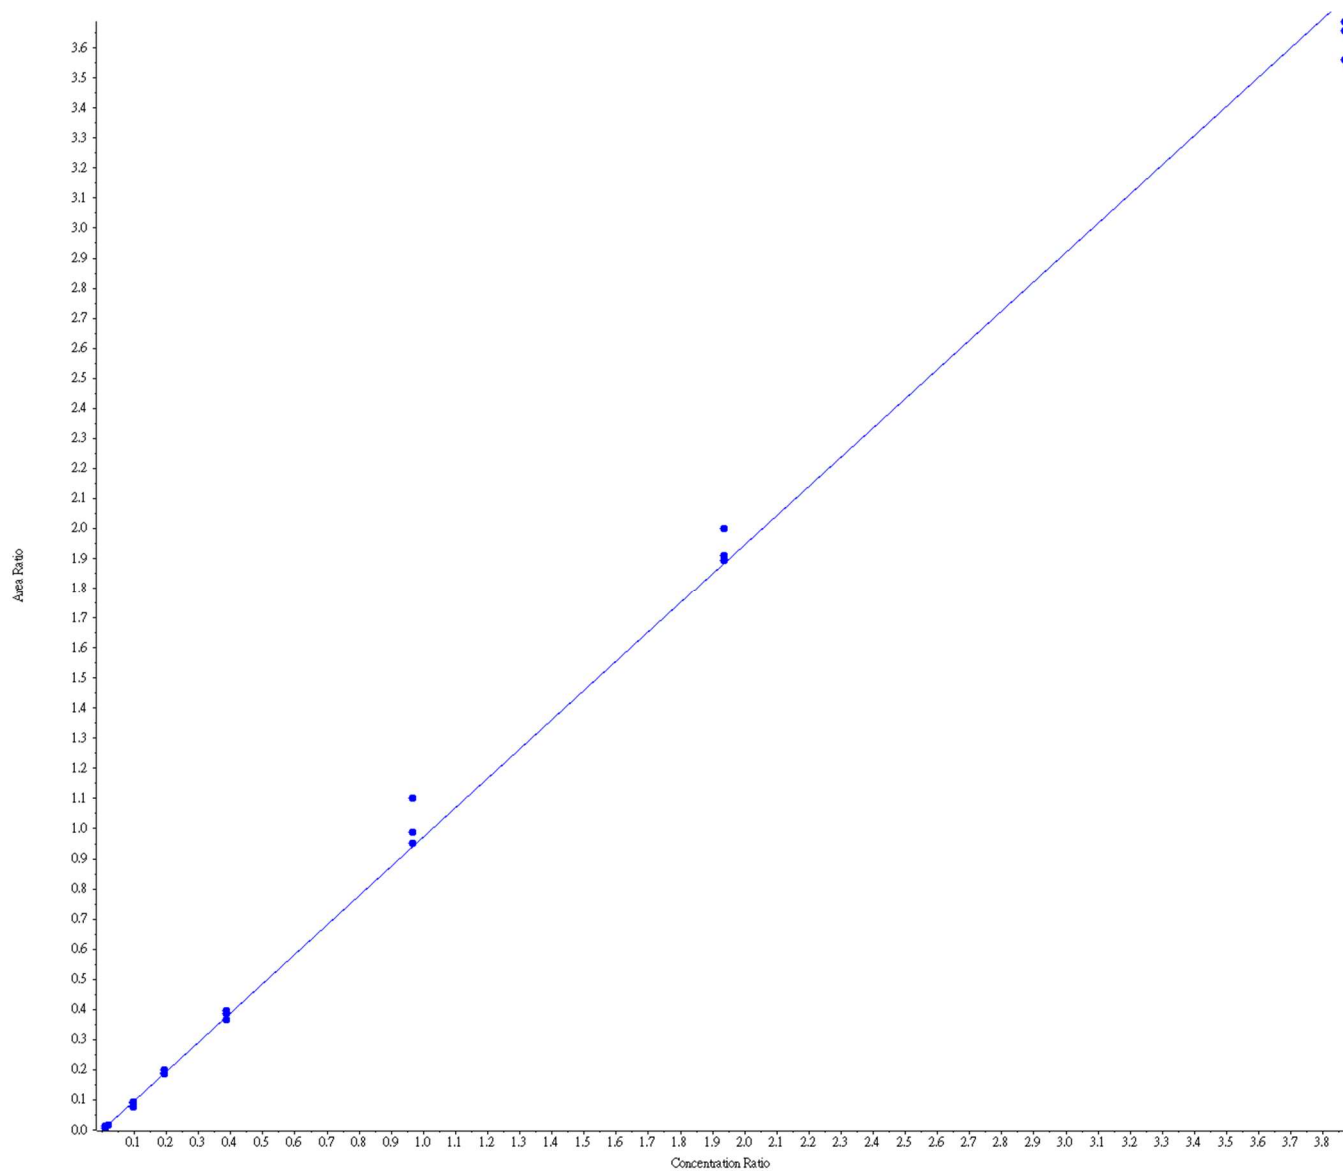

Analyte Name: FIBG.DTVQIHDITGK.3/y9(2+).M00

Calibration Equation:  $y = 1.07379x + 0.00320$  ( $r = 0.99827$ ) (weighting:  $1/x$ )

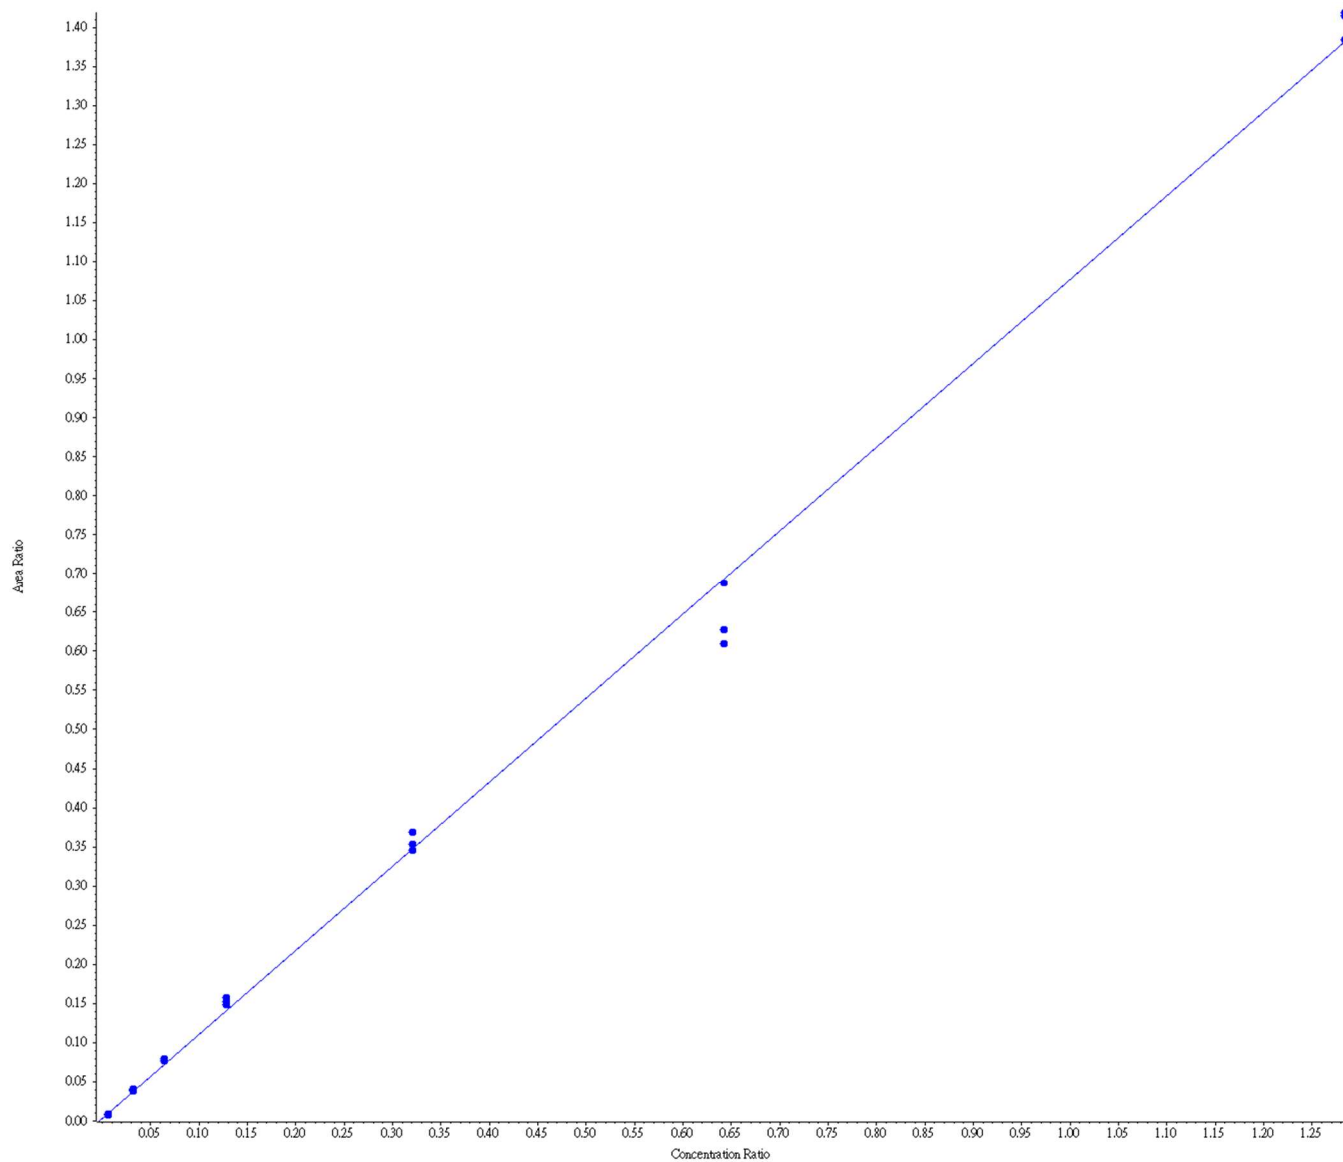

Analyte Name: HEP2.TLEAQLTPR.2/y7.M00

Calibration Equation:  $y = 0.98267 x + 0.00393$  ( $r = 0.99640$ ) (weighting:  $1 / x$ )

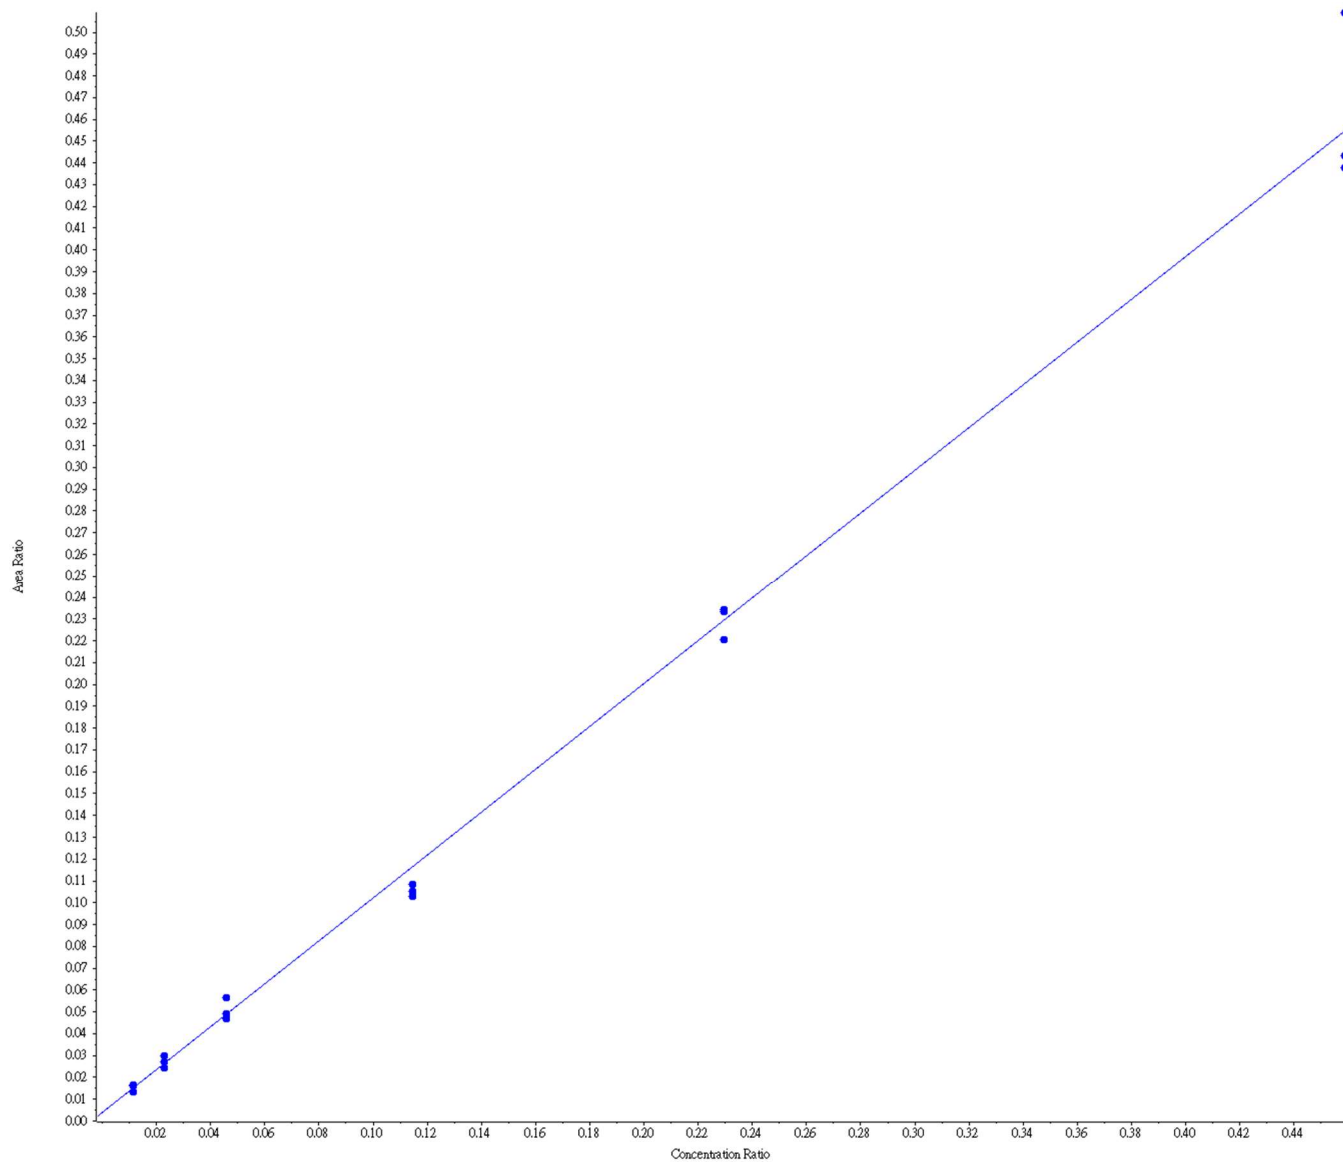

Analyte Name: TTHY.AADDTWEPFASGK.2/y8.M00

Calibration Equation:  $y = 1.00698x - 0.00256$  ( $r = 0.99748$ ) (weighting:  $1/x$ )

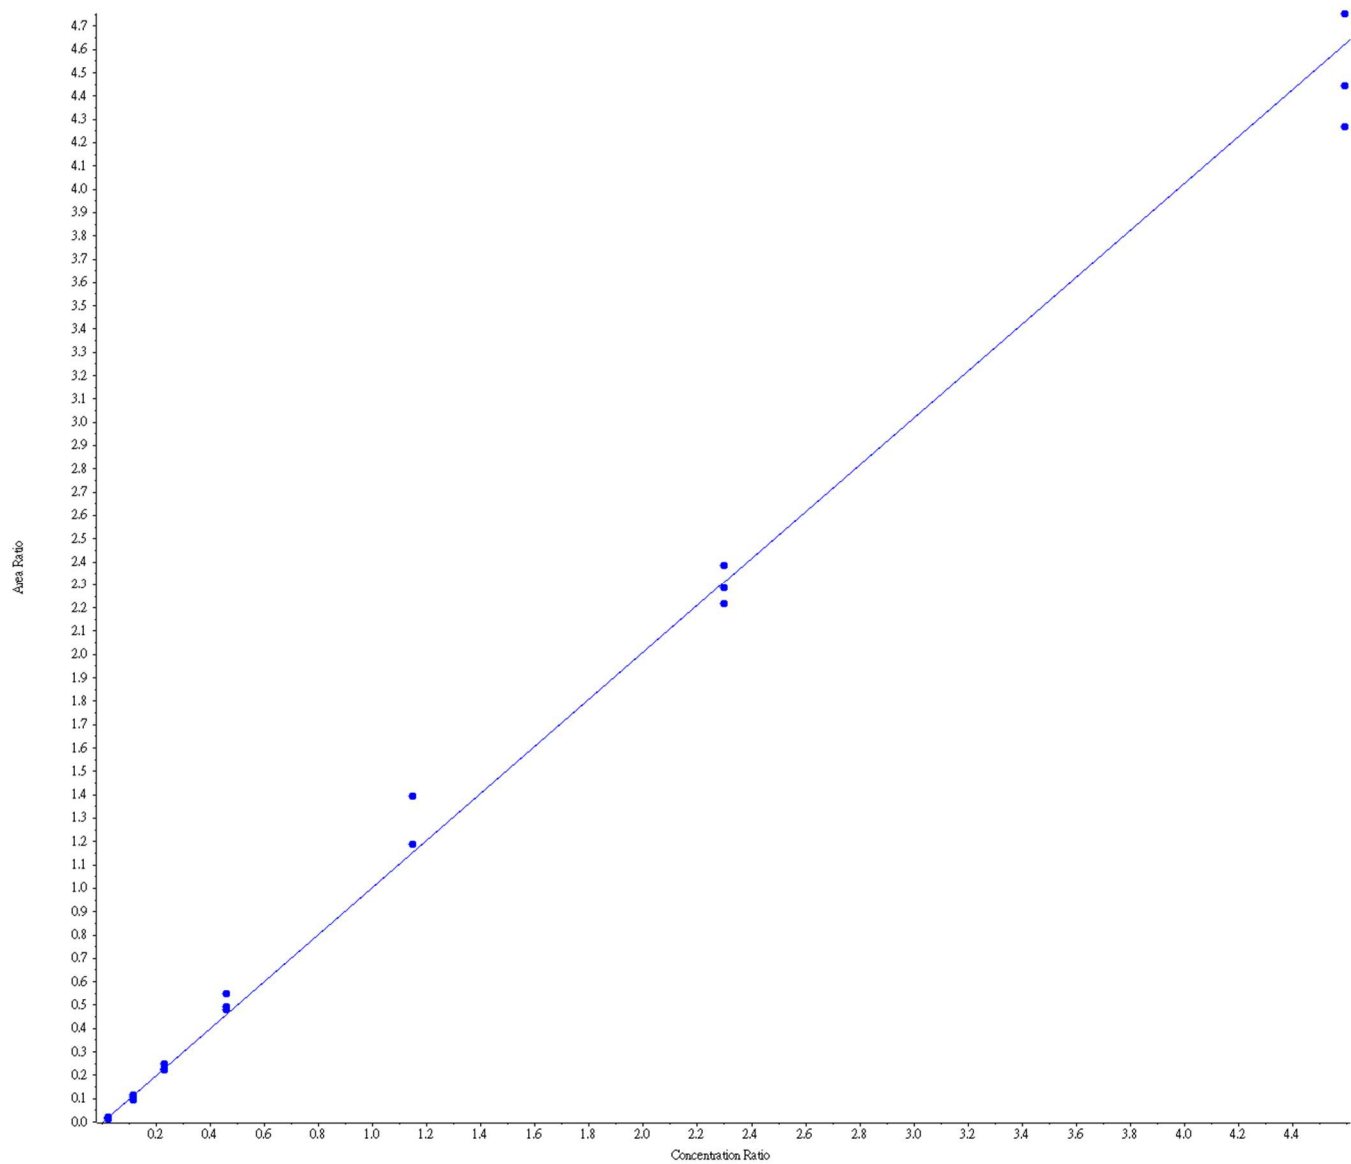

Analyte Name: VTDB.THLPEVFLSK.2/y8.M00

Calibration Equation:  $y = 0.99901x - 9.81721e-4$  ( $r = 0.99881$ ) (weighting:  $1/x$ )

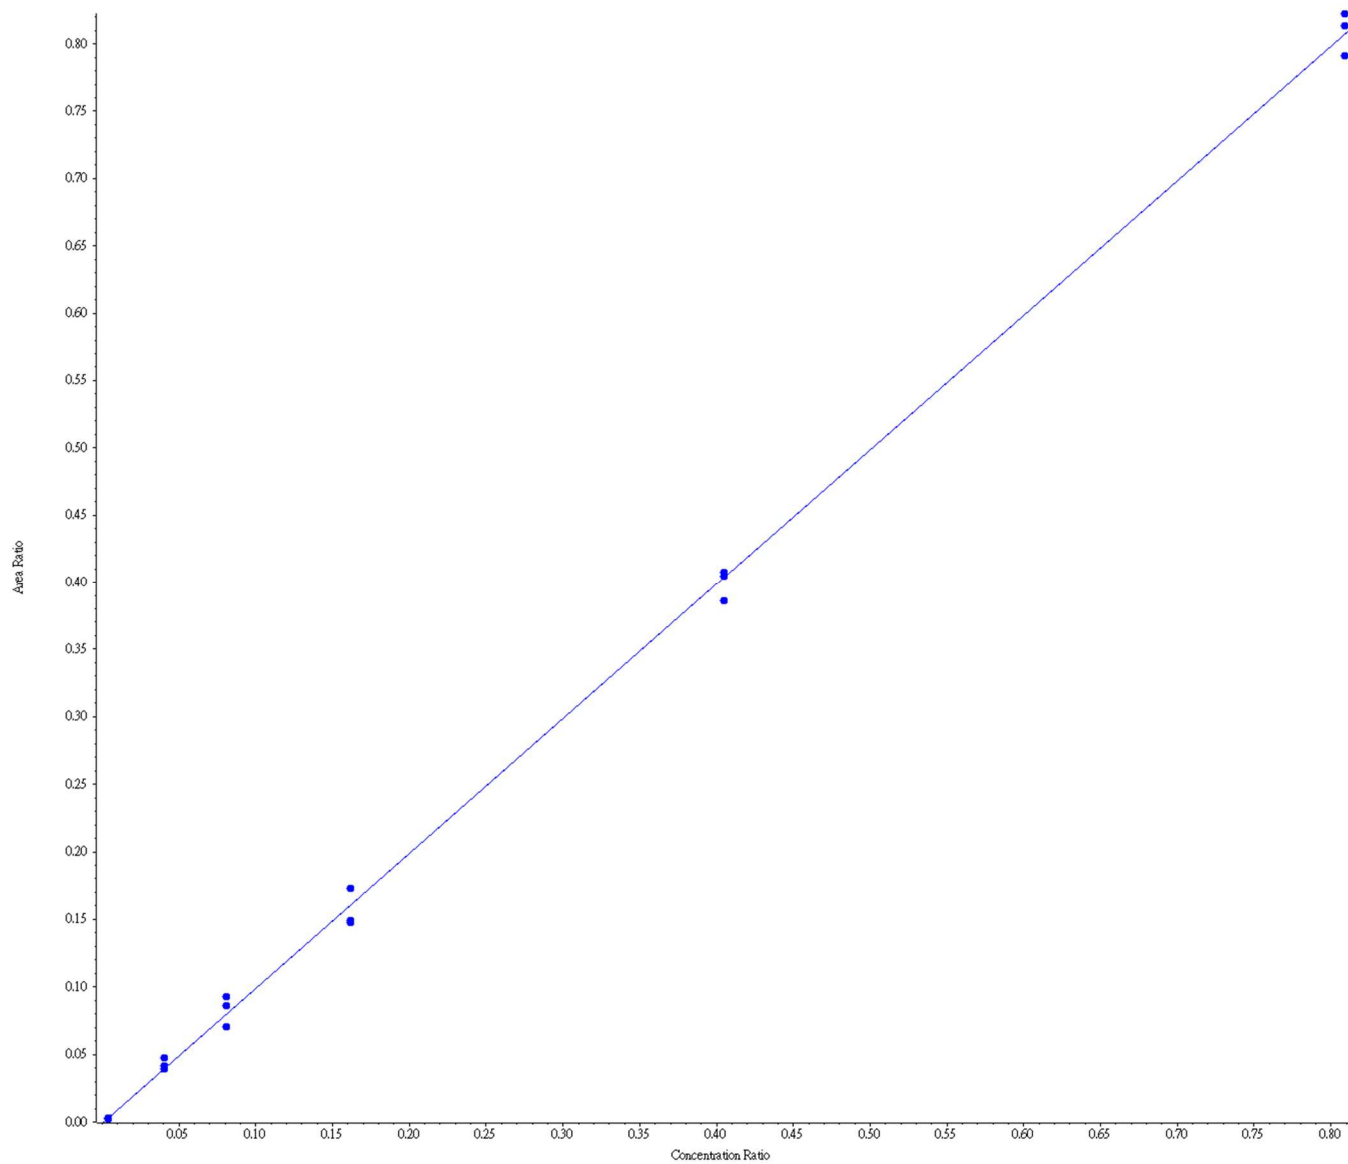

Analyte Name: ALBU.LVNEVTEFAK.2/y5.M00

Calibration Equation:  $y = 1.00903 x + 0.00786$  ( $r = 0.99967$ ) (weighting:  $1 / x$ )

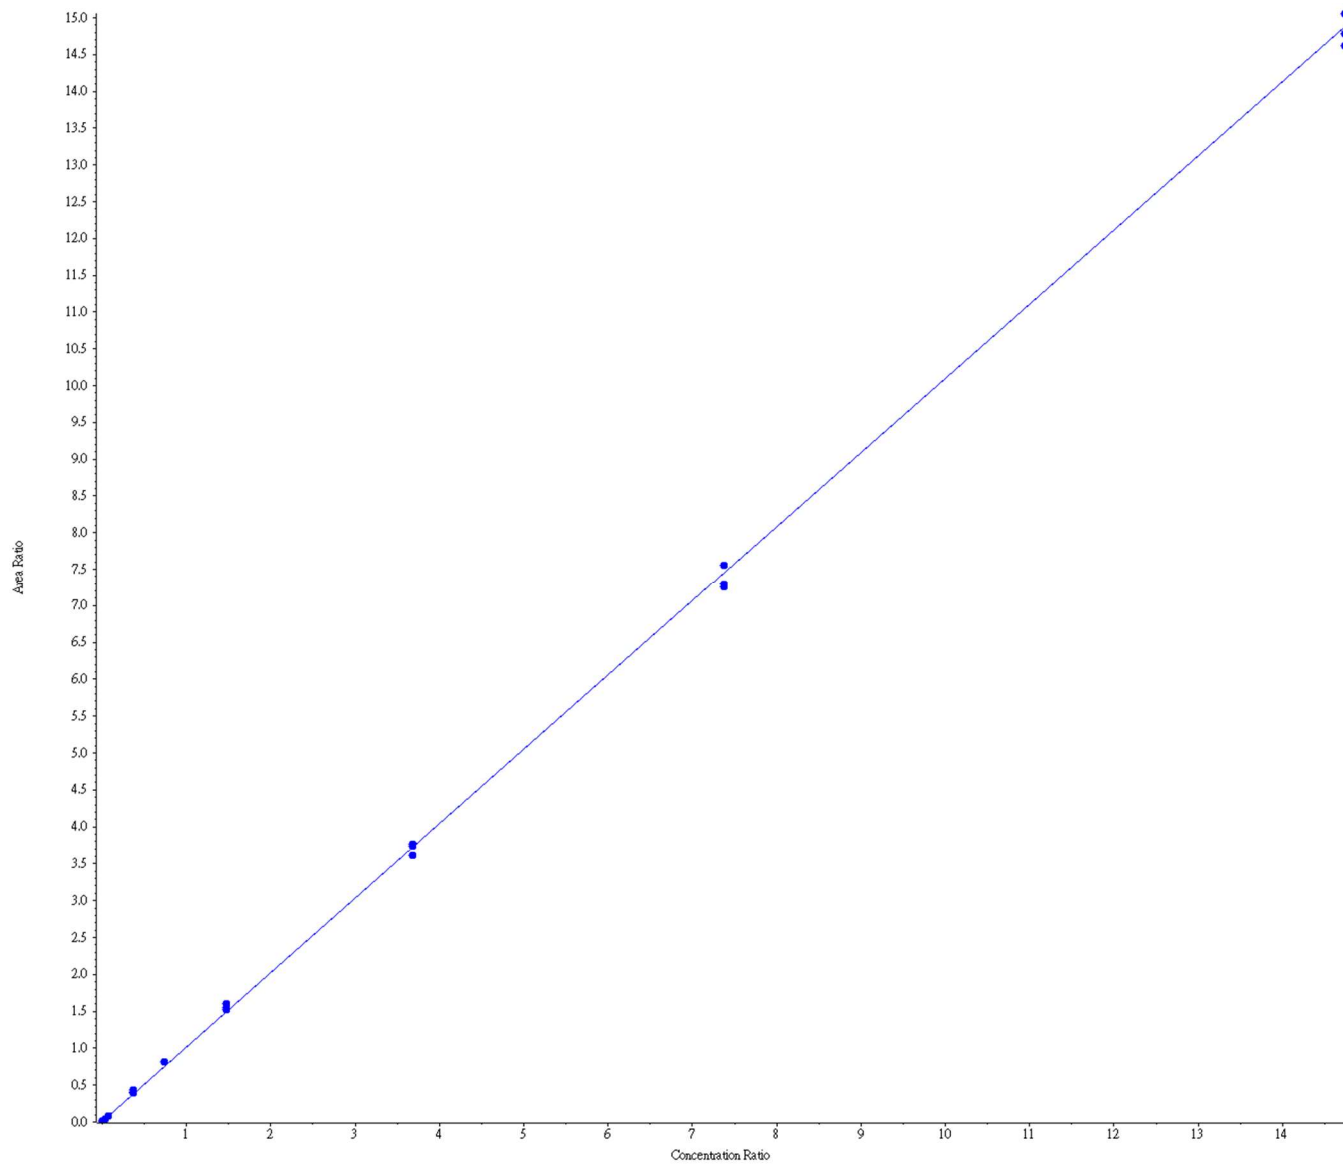

Analyte Name: AACT.EIGELYLPK.2/y5.M00

Calibration Equation:  $y = 1.03910 x + -0.00151$  ( $r = 0.99752$ ) (weighting: 1 / x)

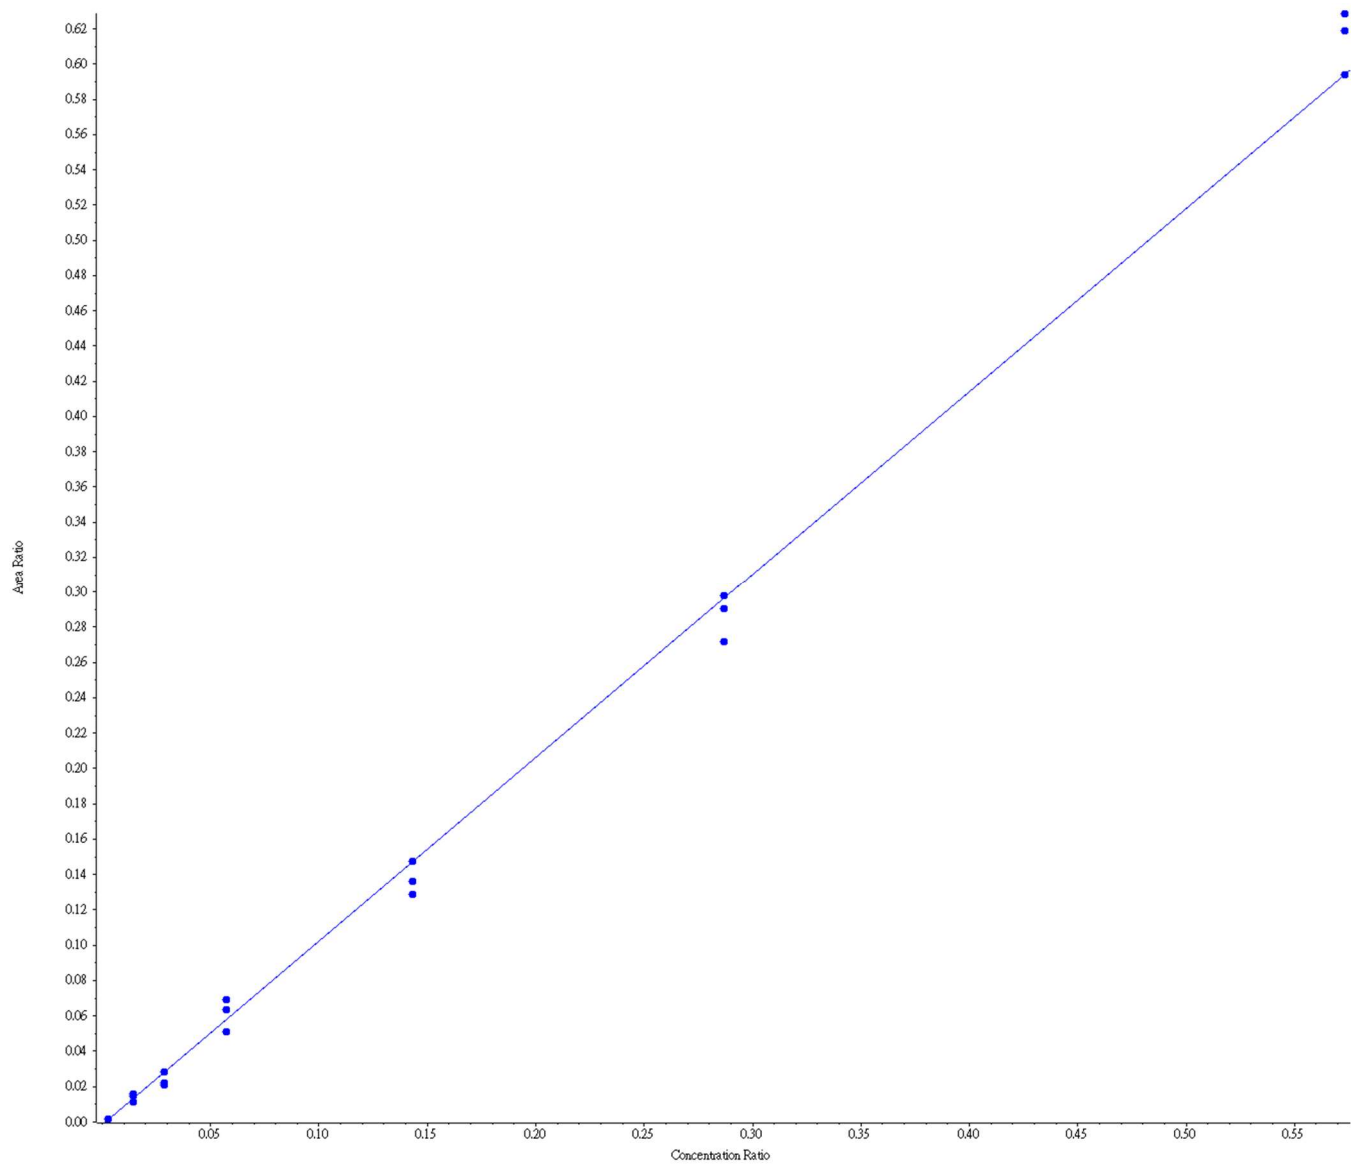



Analyte Name: A1BG.LETPDFQLFK.2/y7.M00

Calibration Equation:  $y = 0.99343 x + -0.00367$  ( $r = 0.99854$ ) (weighting:  $1 / x$ )

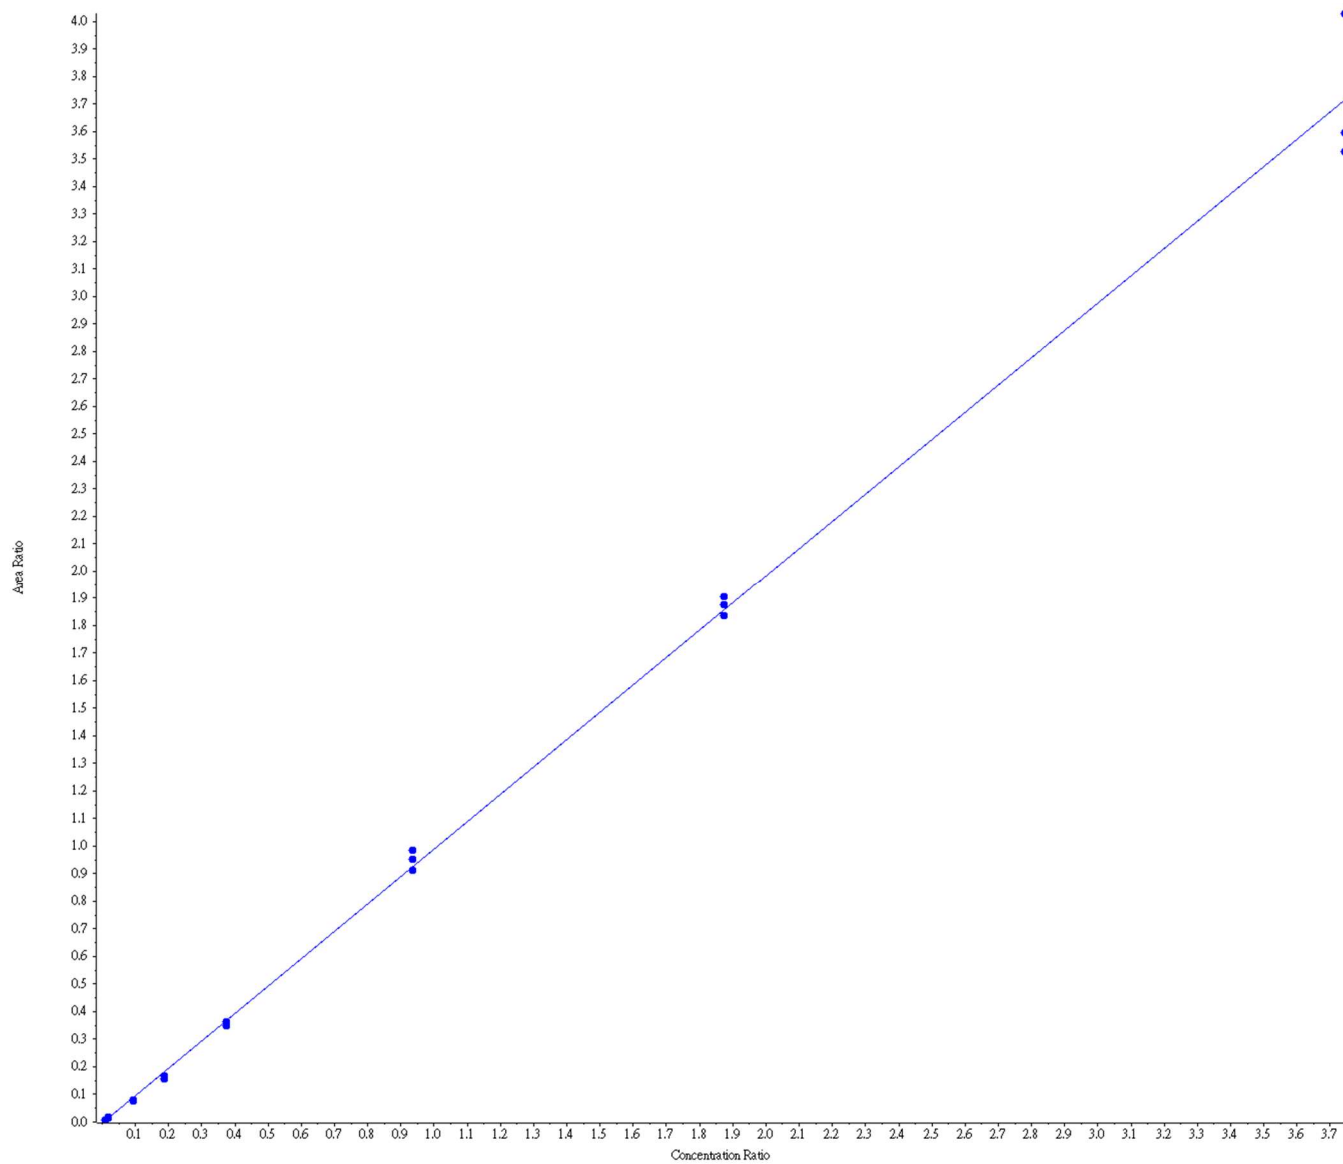

Analyte Name: APOC1.TPDVSSALDK.2/y6.M00

Calibration Equation:  $y = 1.00584 x + 2.10769e-4$  ( $r = 0.99723$ ) (weighting: 1 / x)

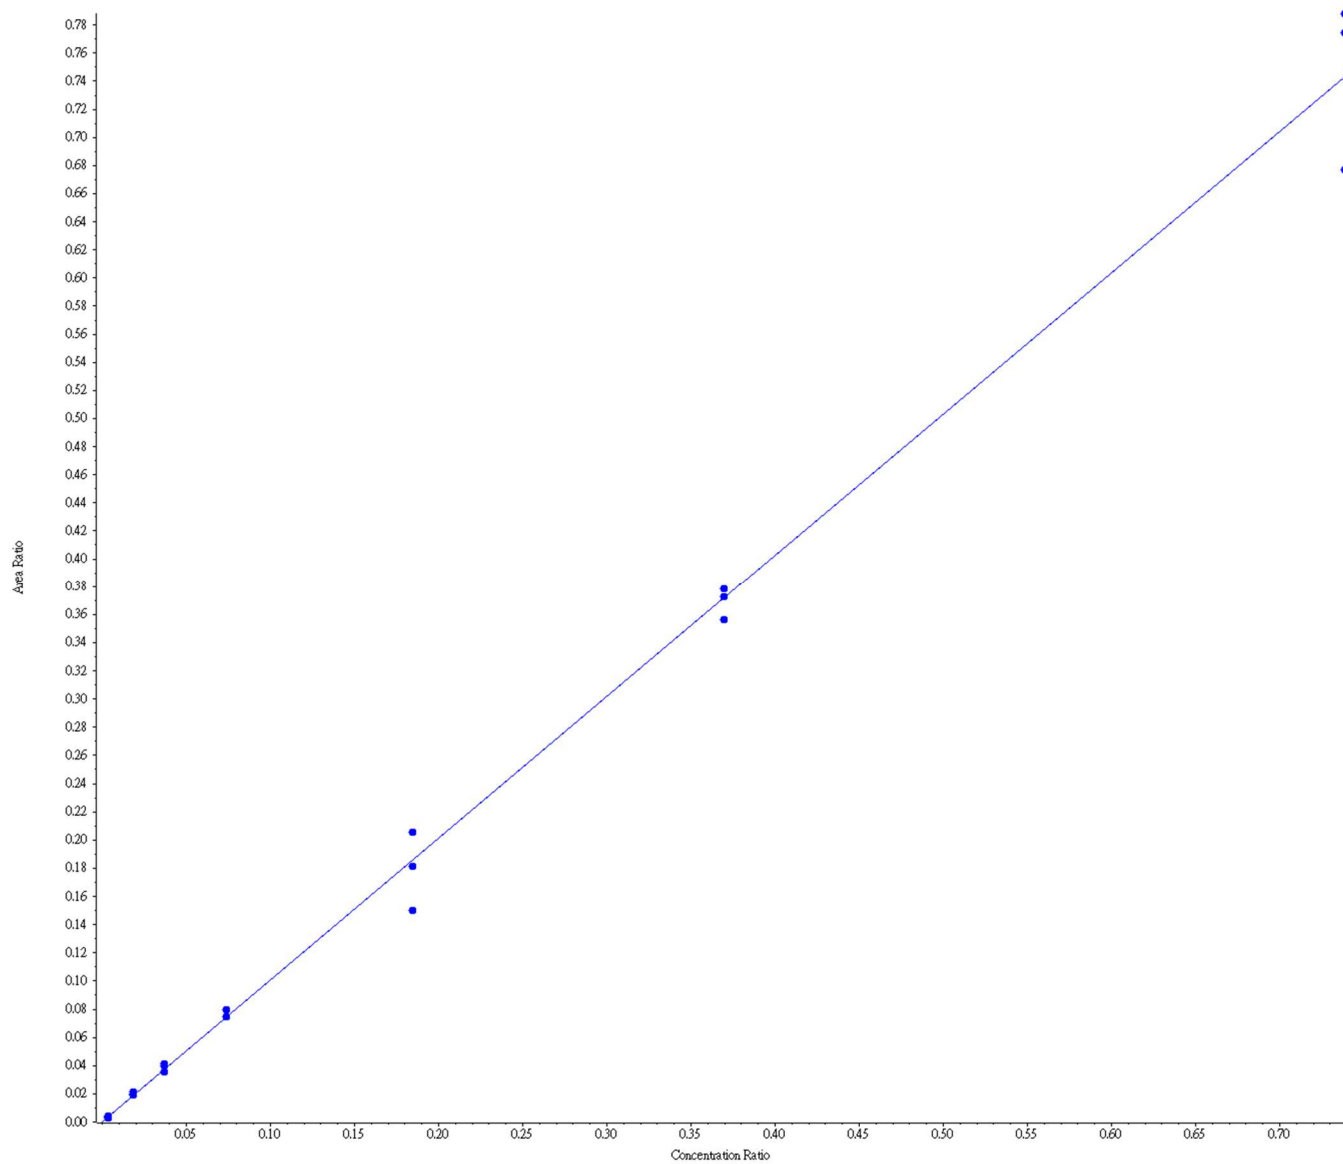

Analyte Name: APOC3.GWVTDGFSSLK.2/y8.M00

Calibration Equation:  $y = 0.99715 x + -2.08728e-4$  ( $r = 0.99858$ ) (weighting: 1 / x)

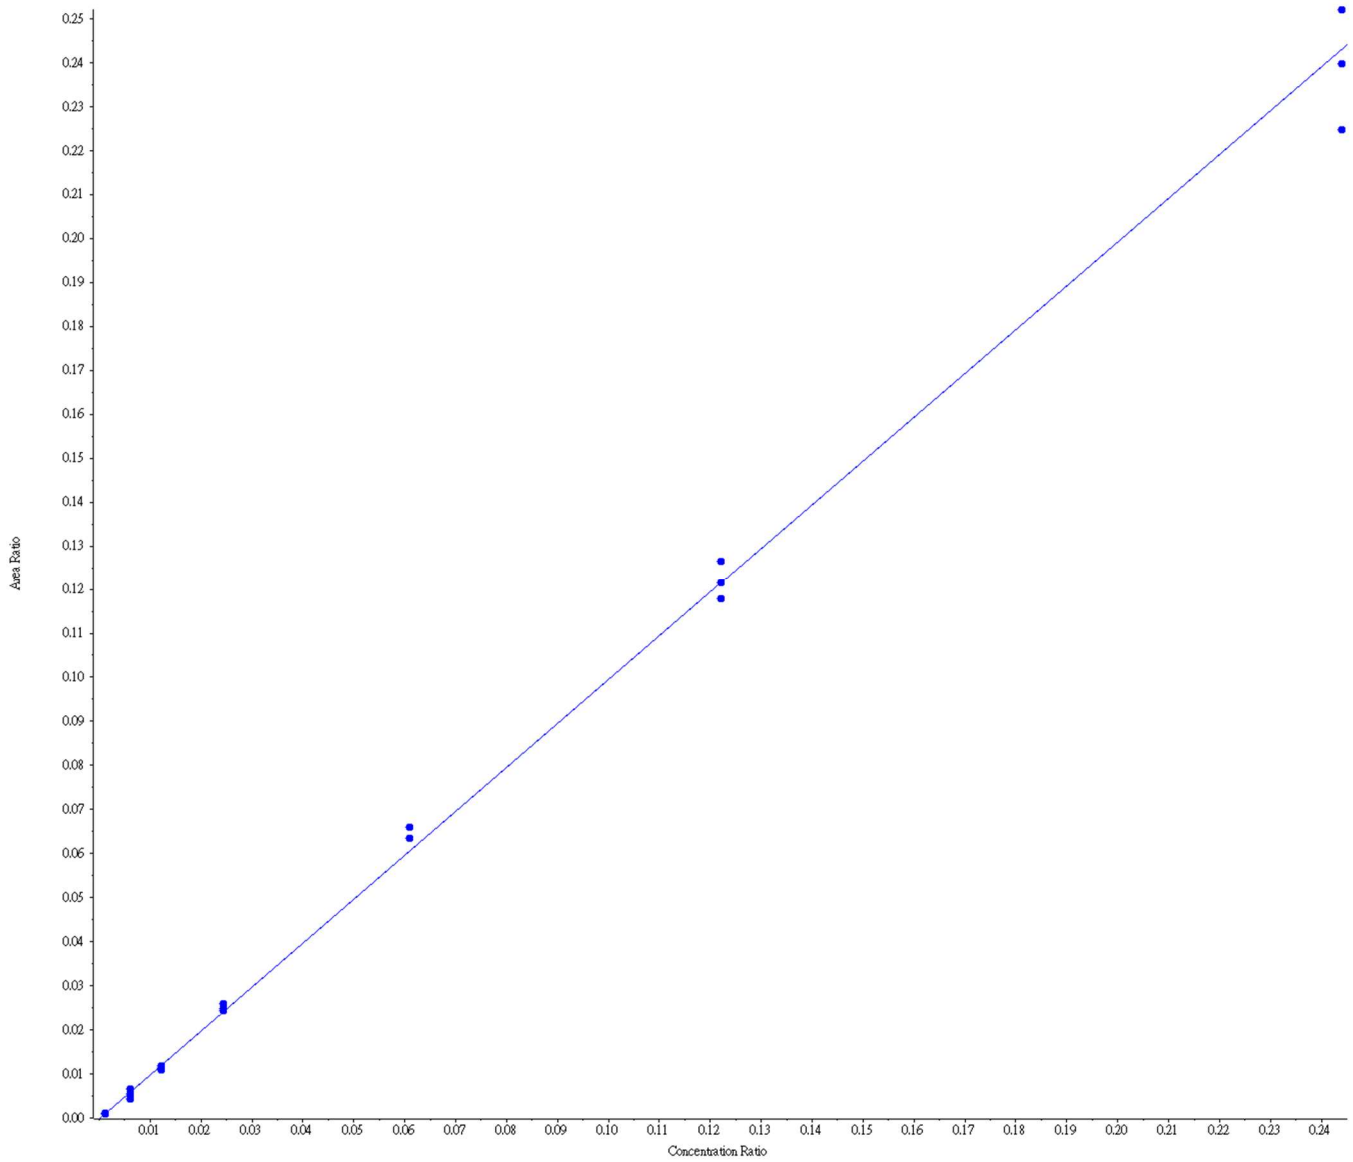

Analyte Name: APOD.IPTTFENGR.2/y8(2+).M00

Calibration Equation:  $y = 1.13007 x + 0.07386$  ( $r = 0.97283$ ) (weighting:  $1 / x$ )

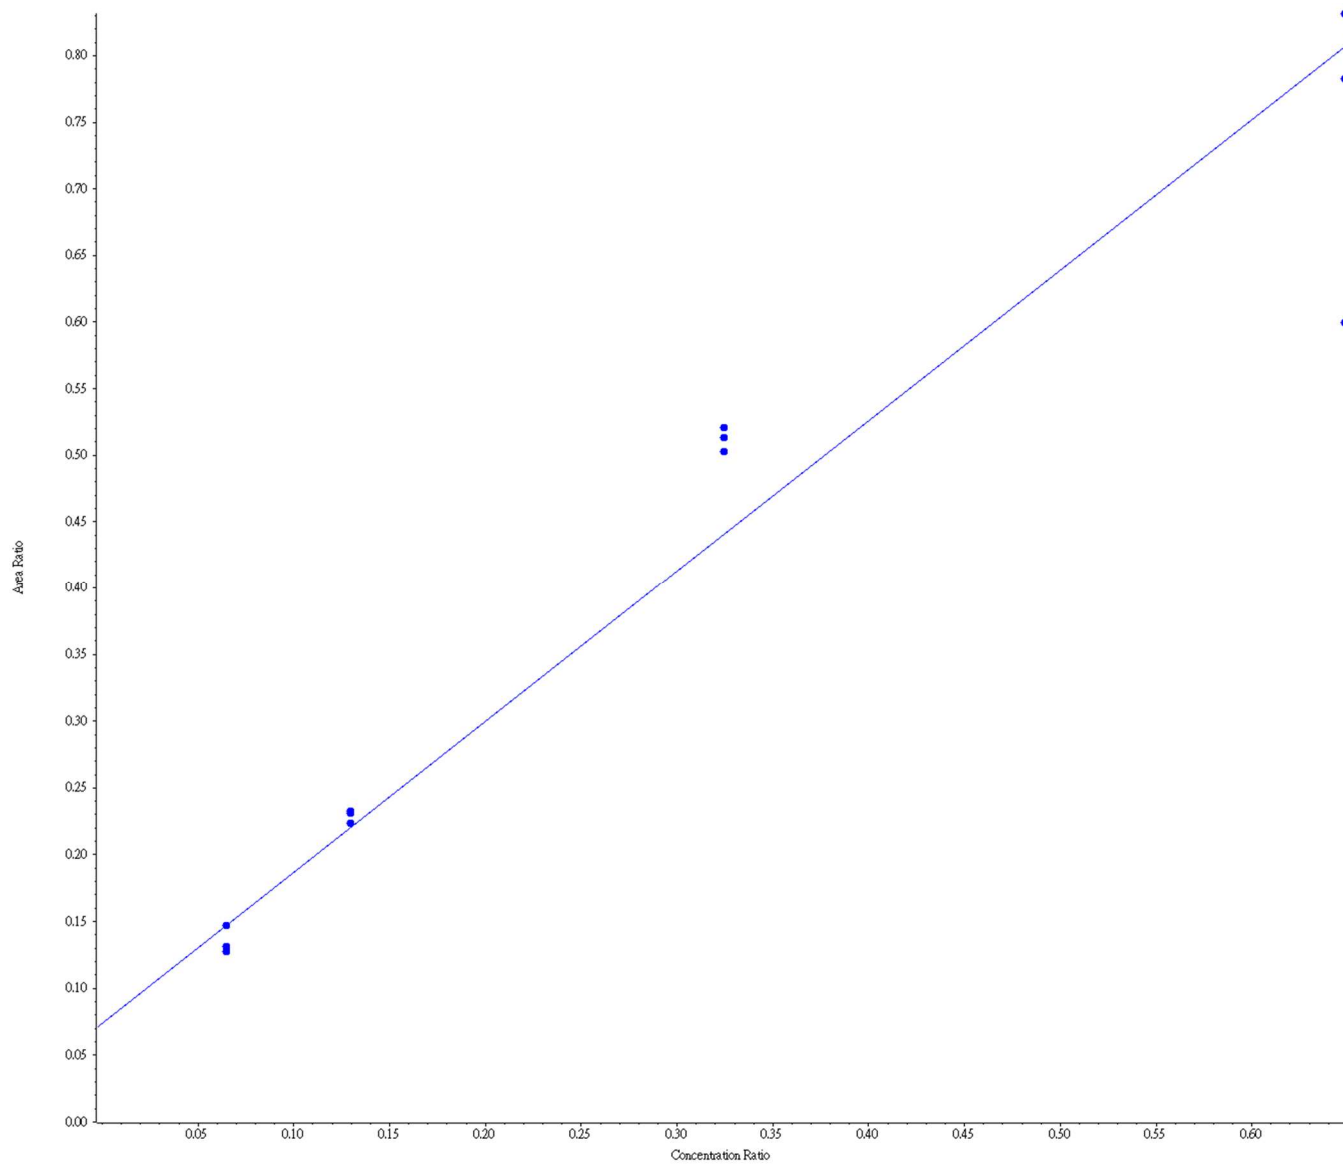

Analyte Name: APOE.LGPLVEQGR.2/y7(2+).M00

Calibration Equation:  $y = 1.05356 x + -0.00253$  ( $r = 0.99707$ ) (weighting: 1 / x)

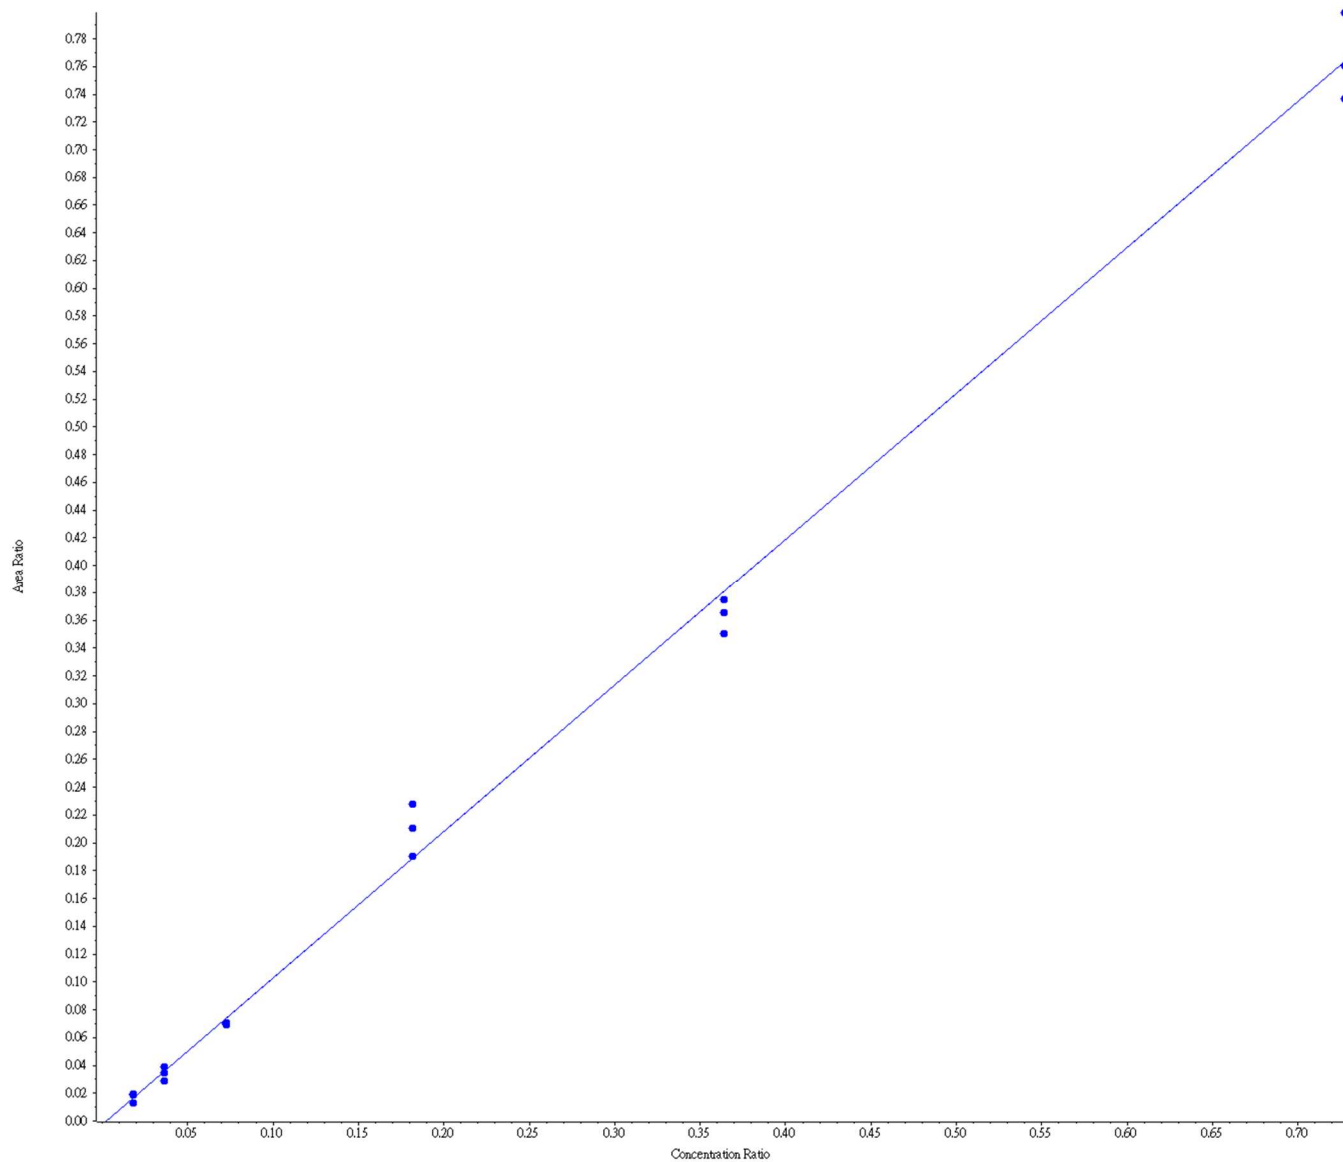

Analyte Name: CLUS.ELDESLQVAER.2/y3.M00

Calibration Equation:  $y = 1.03409 x + -0.00630$  ( $r = 0.99897$ ) (weighting:  $1 / x$ )

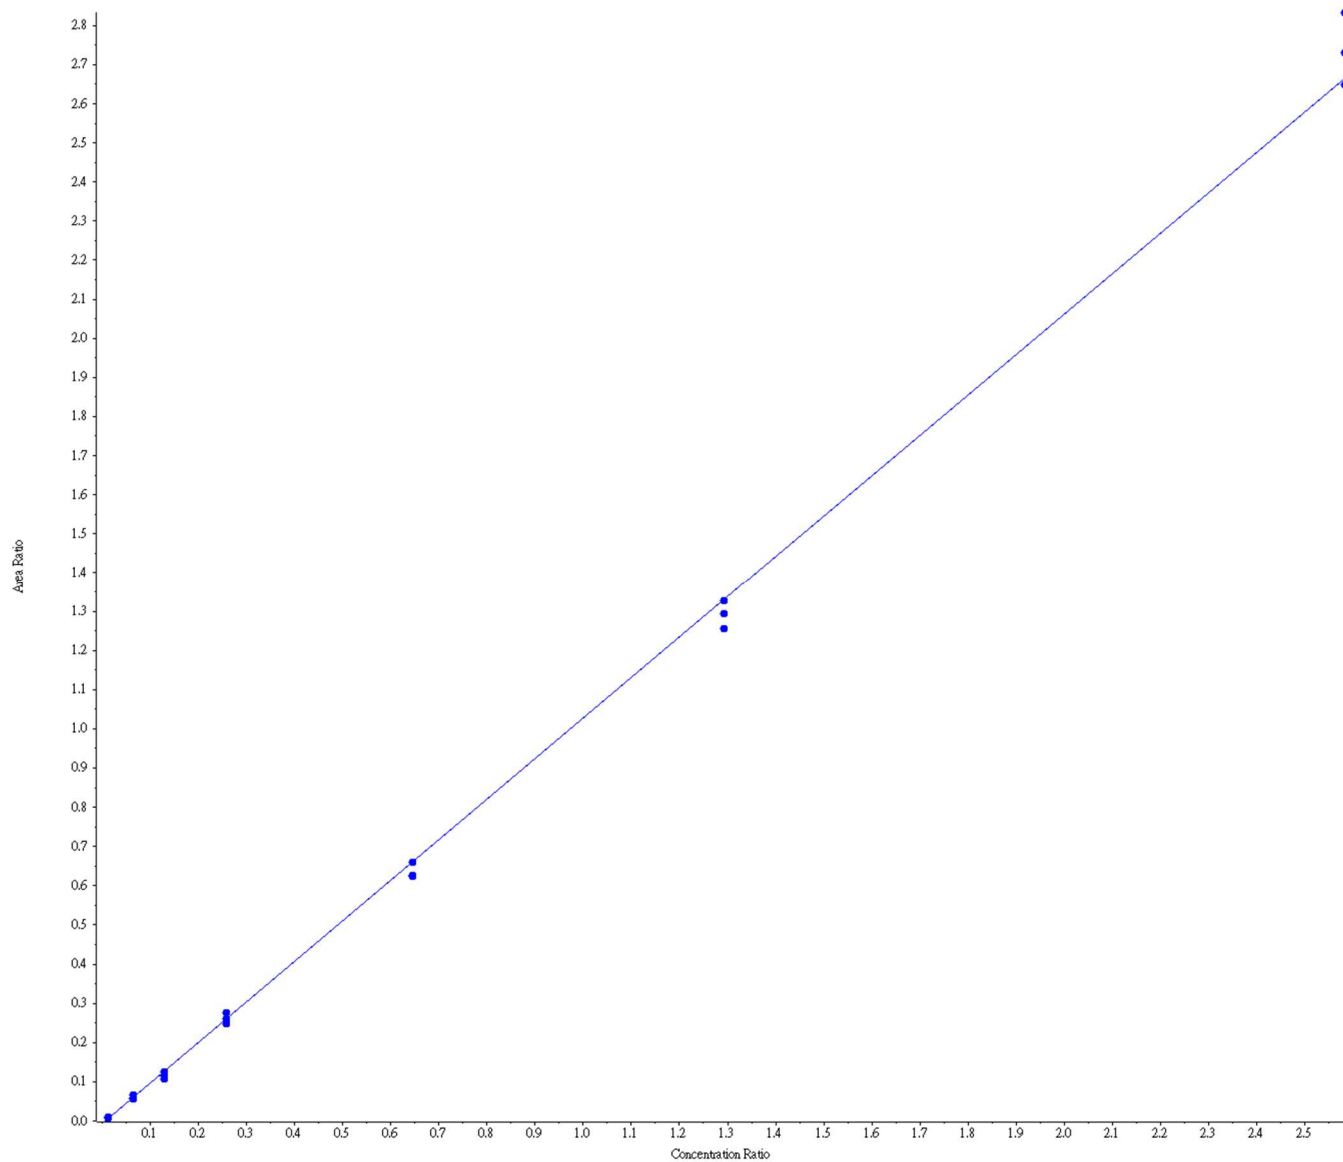

Analyte Name: C1 inactivator.LLDSLPSDTR.2/y5.M00

Calibration Equation:  $y = 1.00670 x + -3.85779e-4$  ( $r = 0.99960$ ) (weighting: 1 / x)

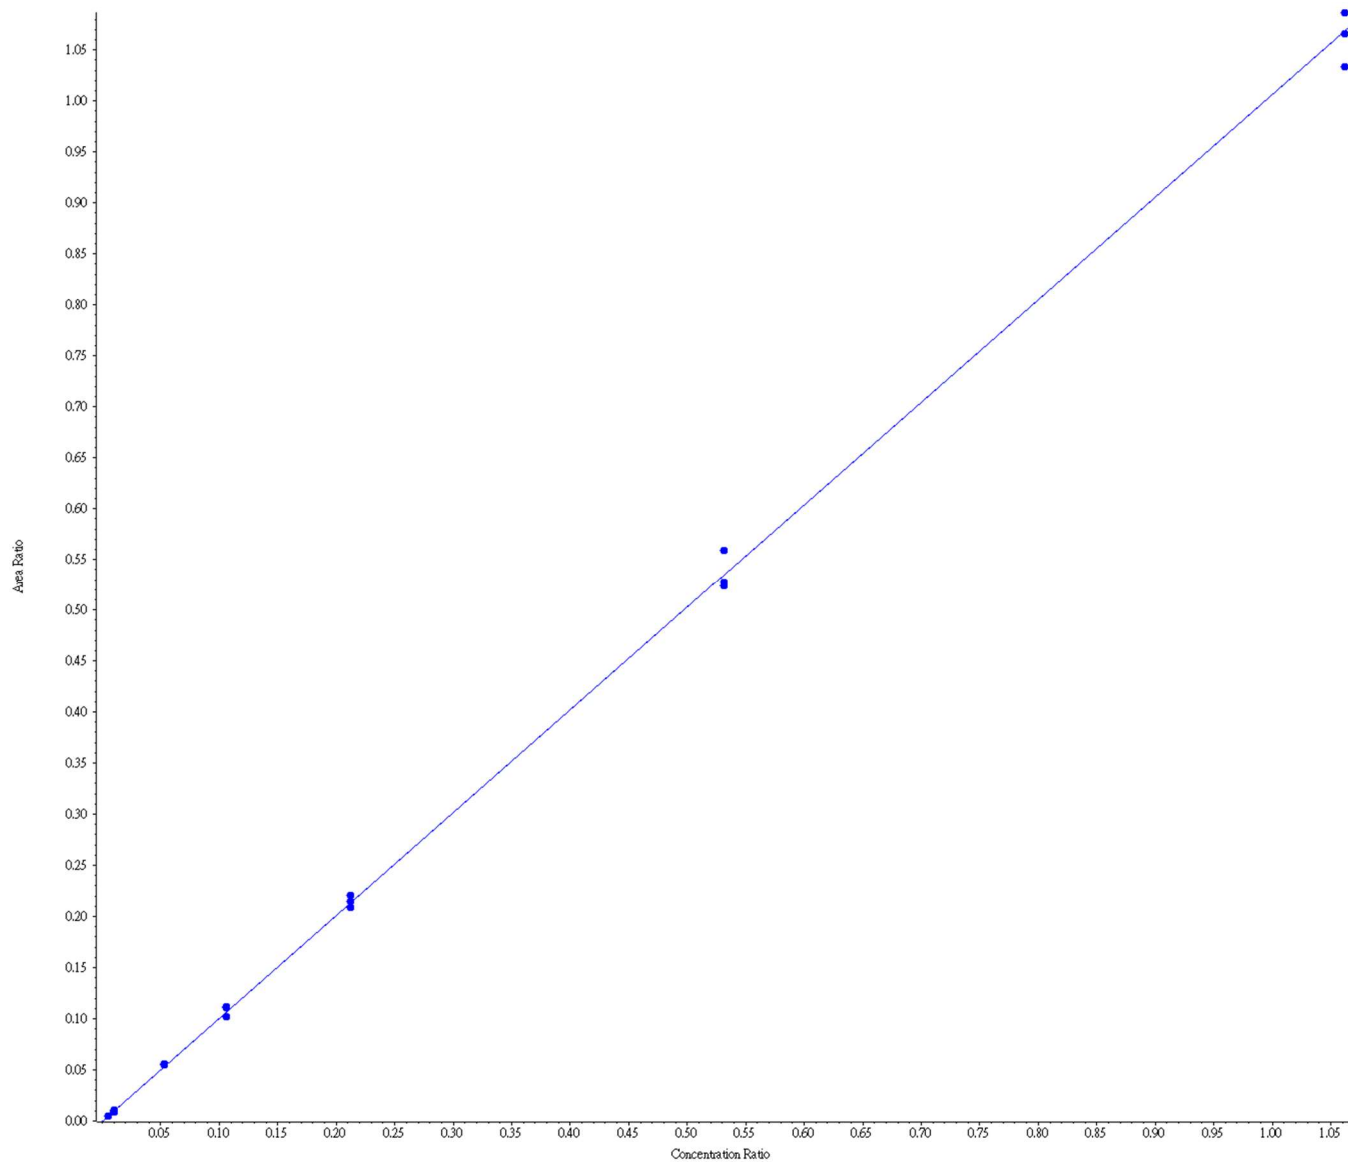

Analyte Name: CFB.EELLPAQDIK.2/y6.M00

Calibration Equation:  $y = 1.02584 x + 0.00595$  ( $r = 0.99857$ ) (weighting:  $1 / x$ )

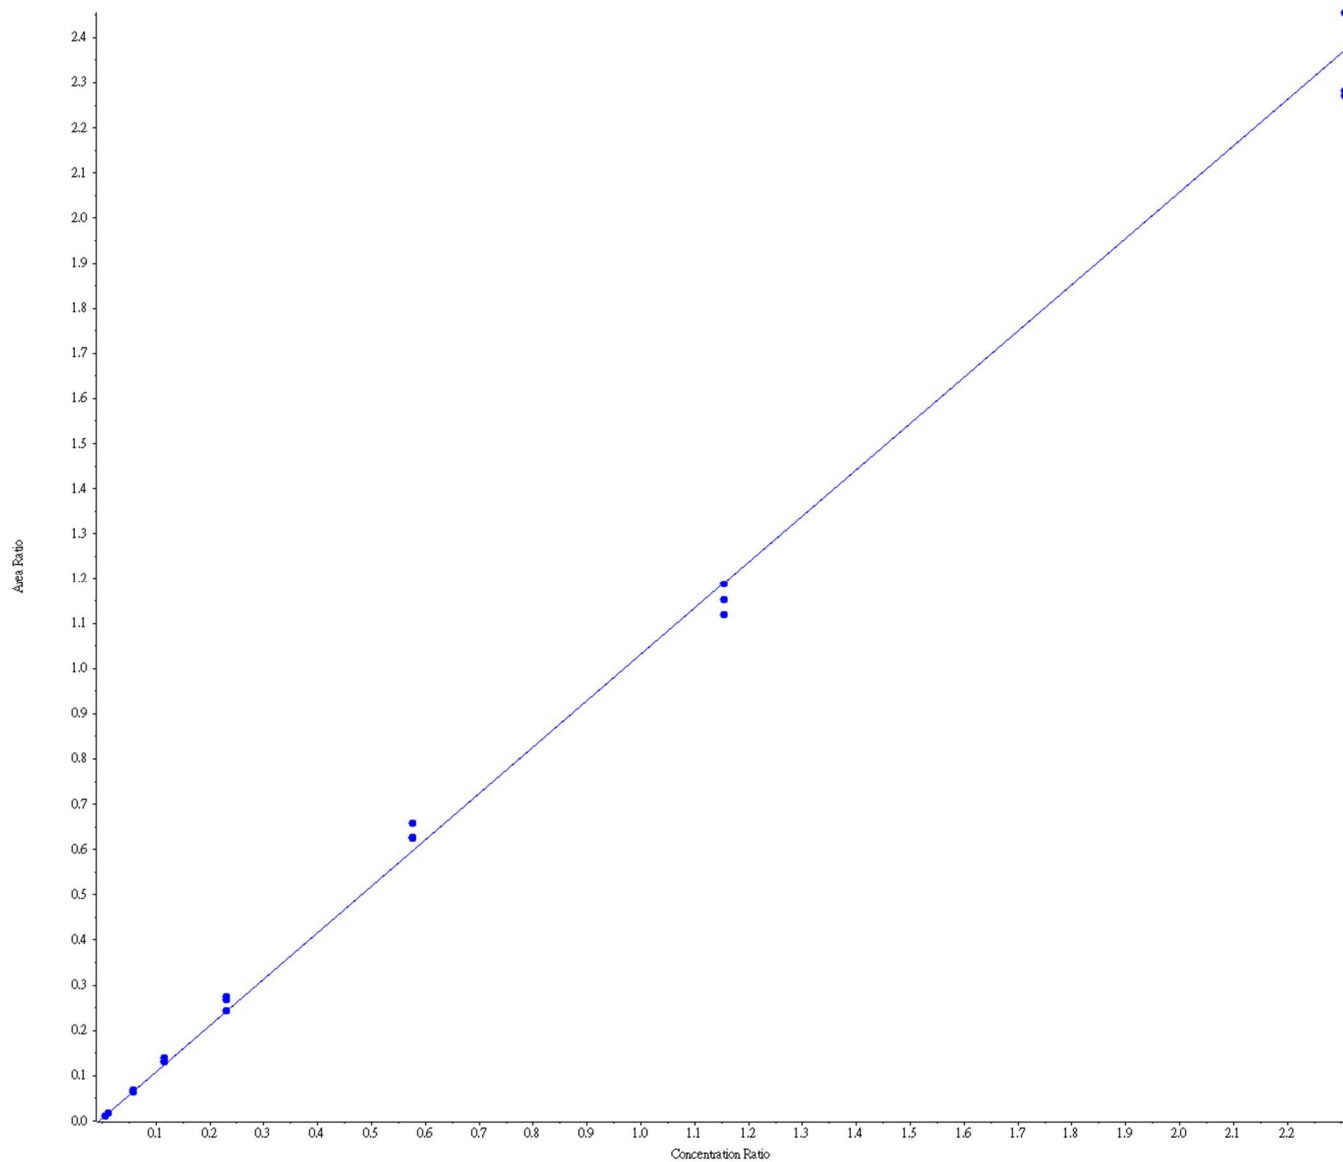



Analyte Name: CFAH.SPDVINGSPISQK.2/y8.M00

Calibration Equation:  $y = 1.01129x + 5.77002e-5$  ( $r = 0.99772$ ) (weighting:  $1/x$ )

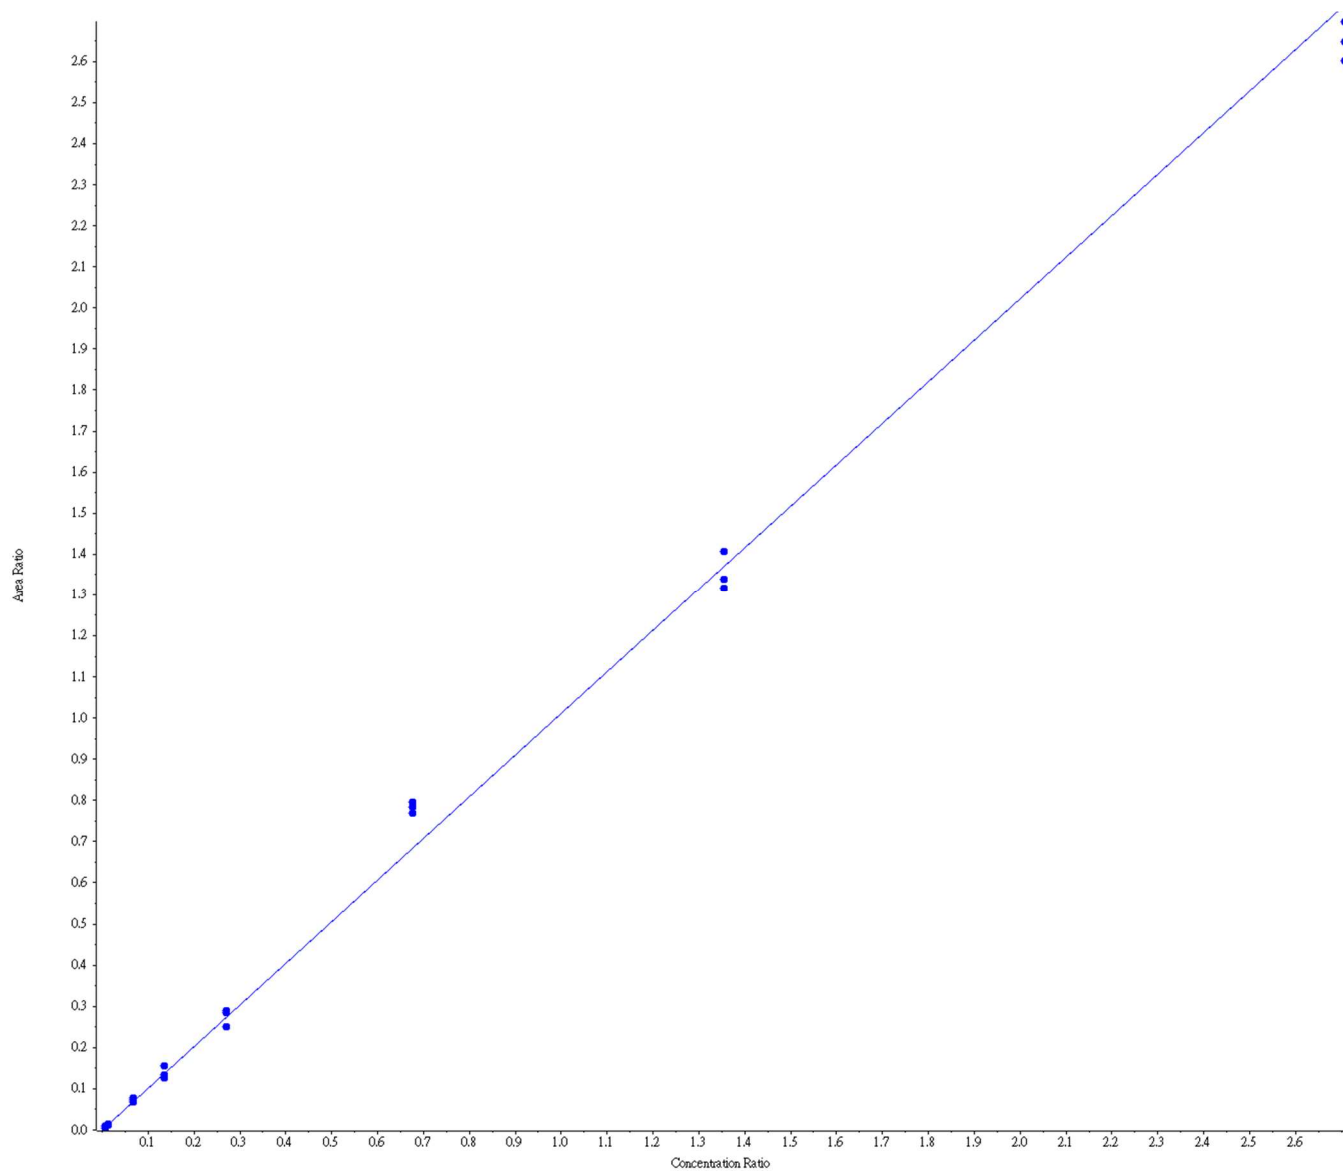

Analyte Name: CRP.ESDTSYVSLK.2/y3.M00

Calibration Equation:  $y = 0.99844 x + 0.00160$  ( $r = 0.99374$ ) (weighting:  $1 / x$ )

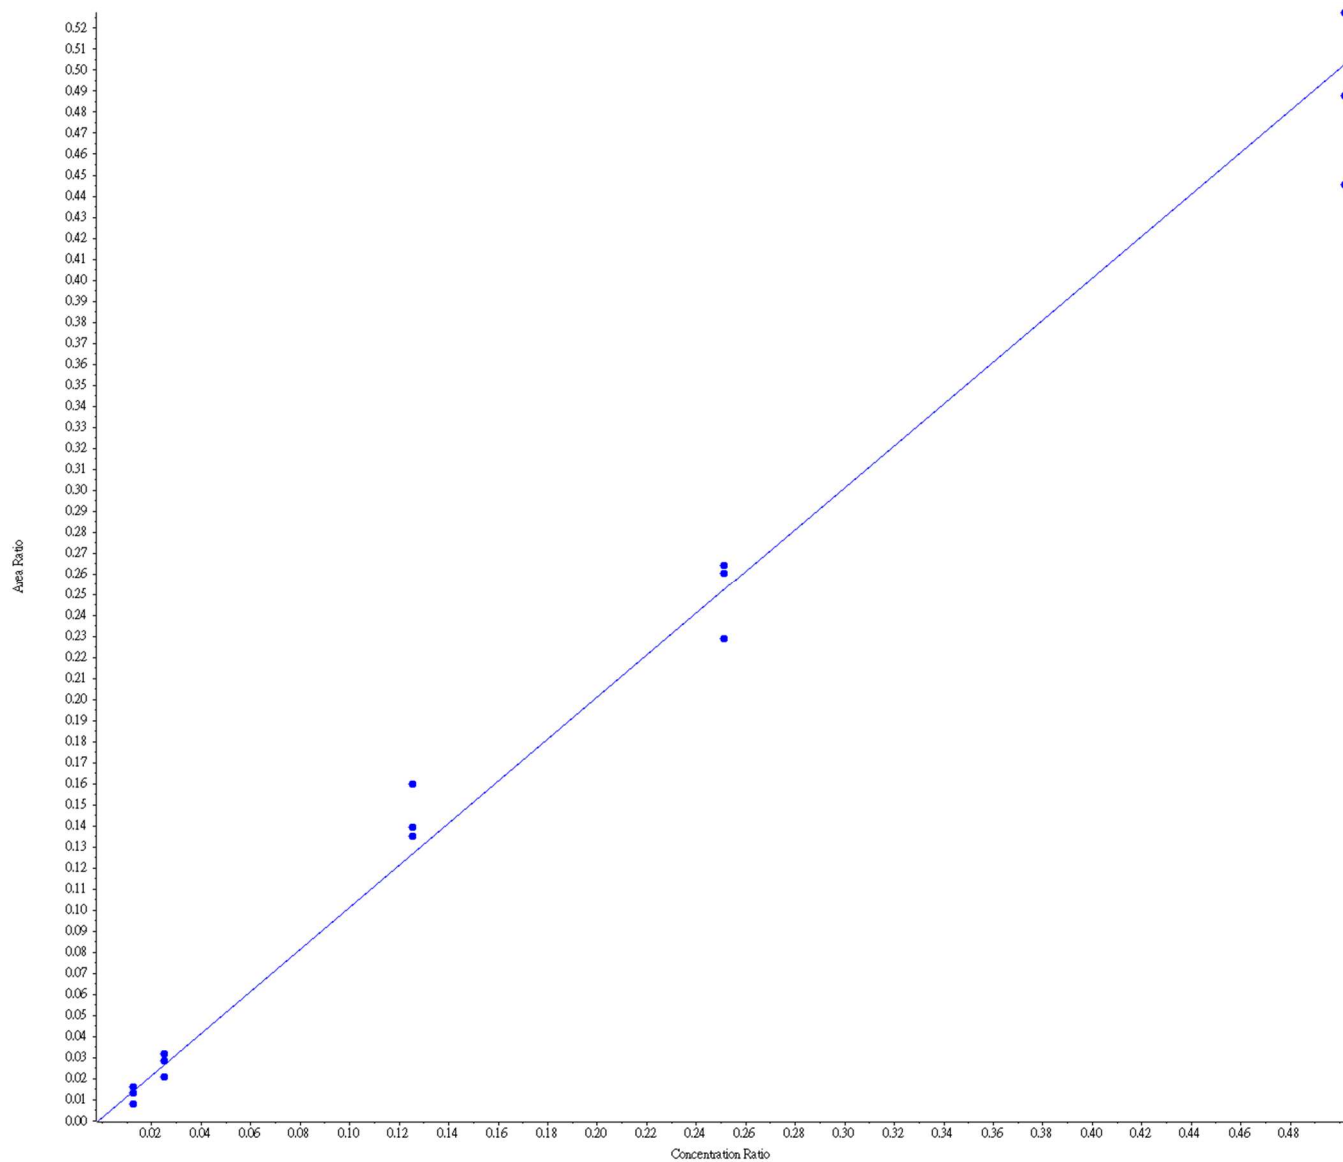

Analyte Name: A2AP.LGNQEPGGQTALK.2/y8.M00

Calibration Equation:  $y = 0.93131x + -6.75118e-4$  ( $r = 0.99619$ ) (weighting:  $1/x$ )

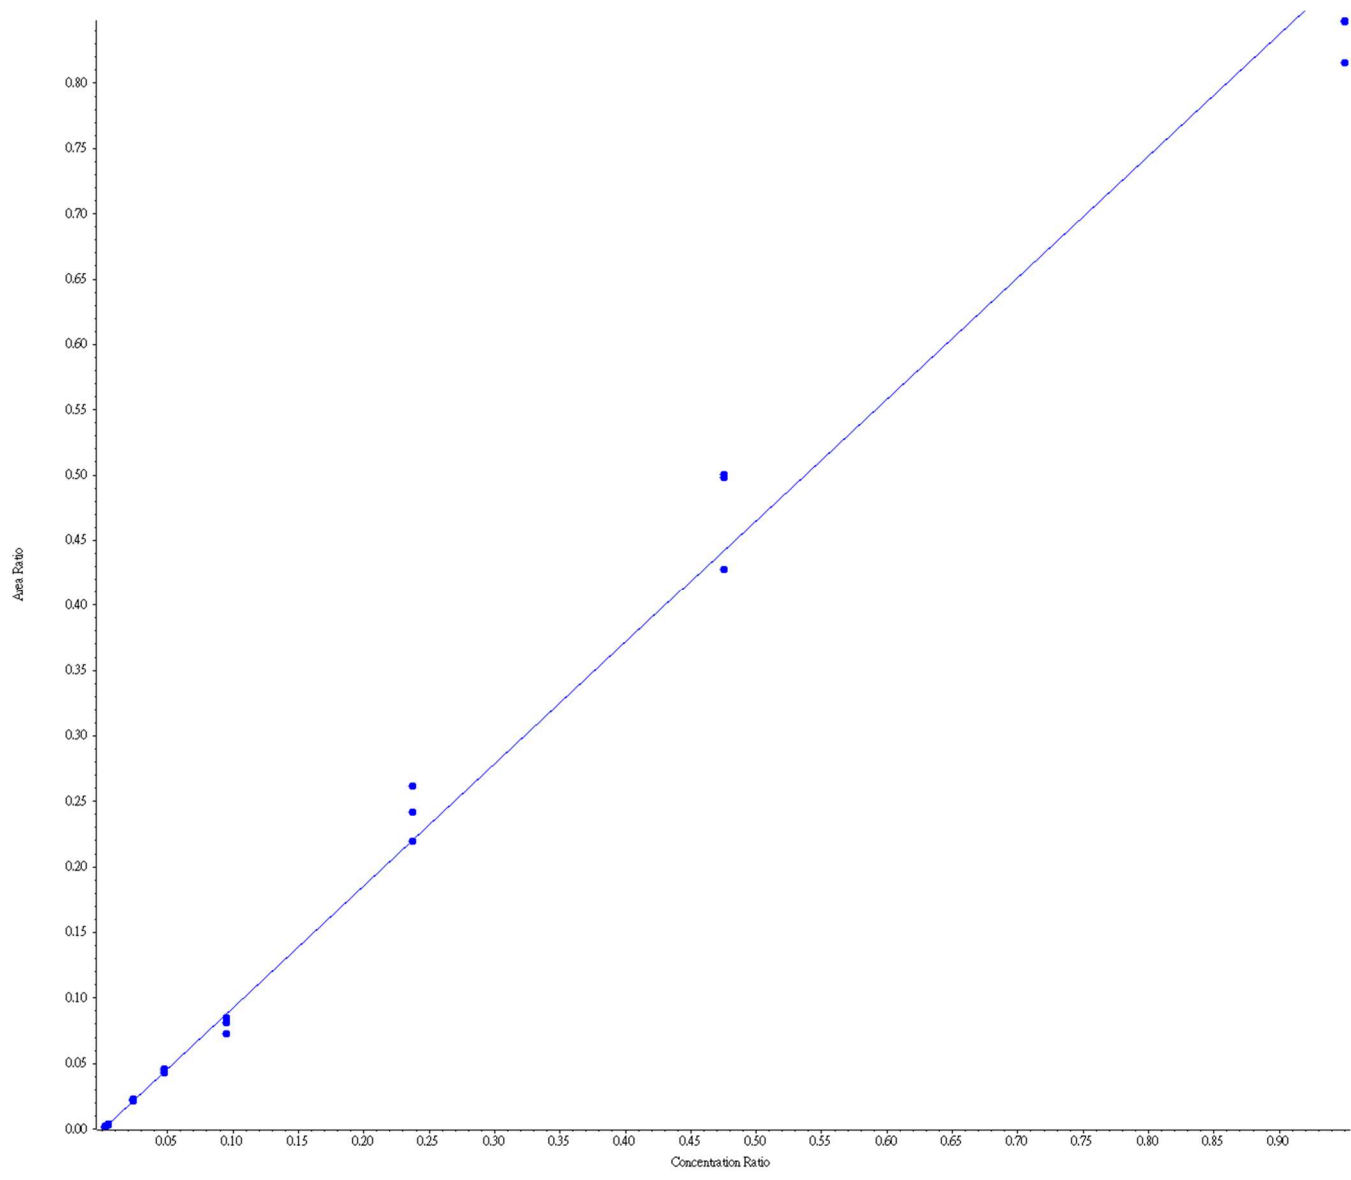

Analyte Name: GELS.TGAQELLR.2/y5.M00

Calibration Equation:  $y = 1.04104 x + 9.59314e-4$  ( $r = 0.99834$ ) (weighting:  $1 / x$ )

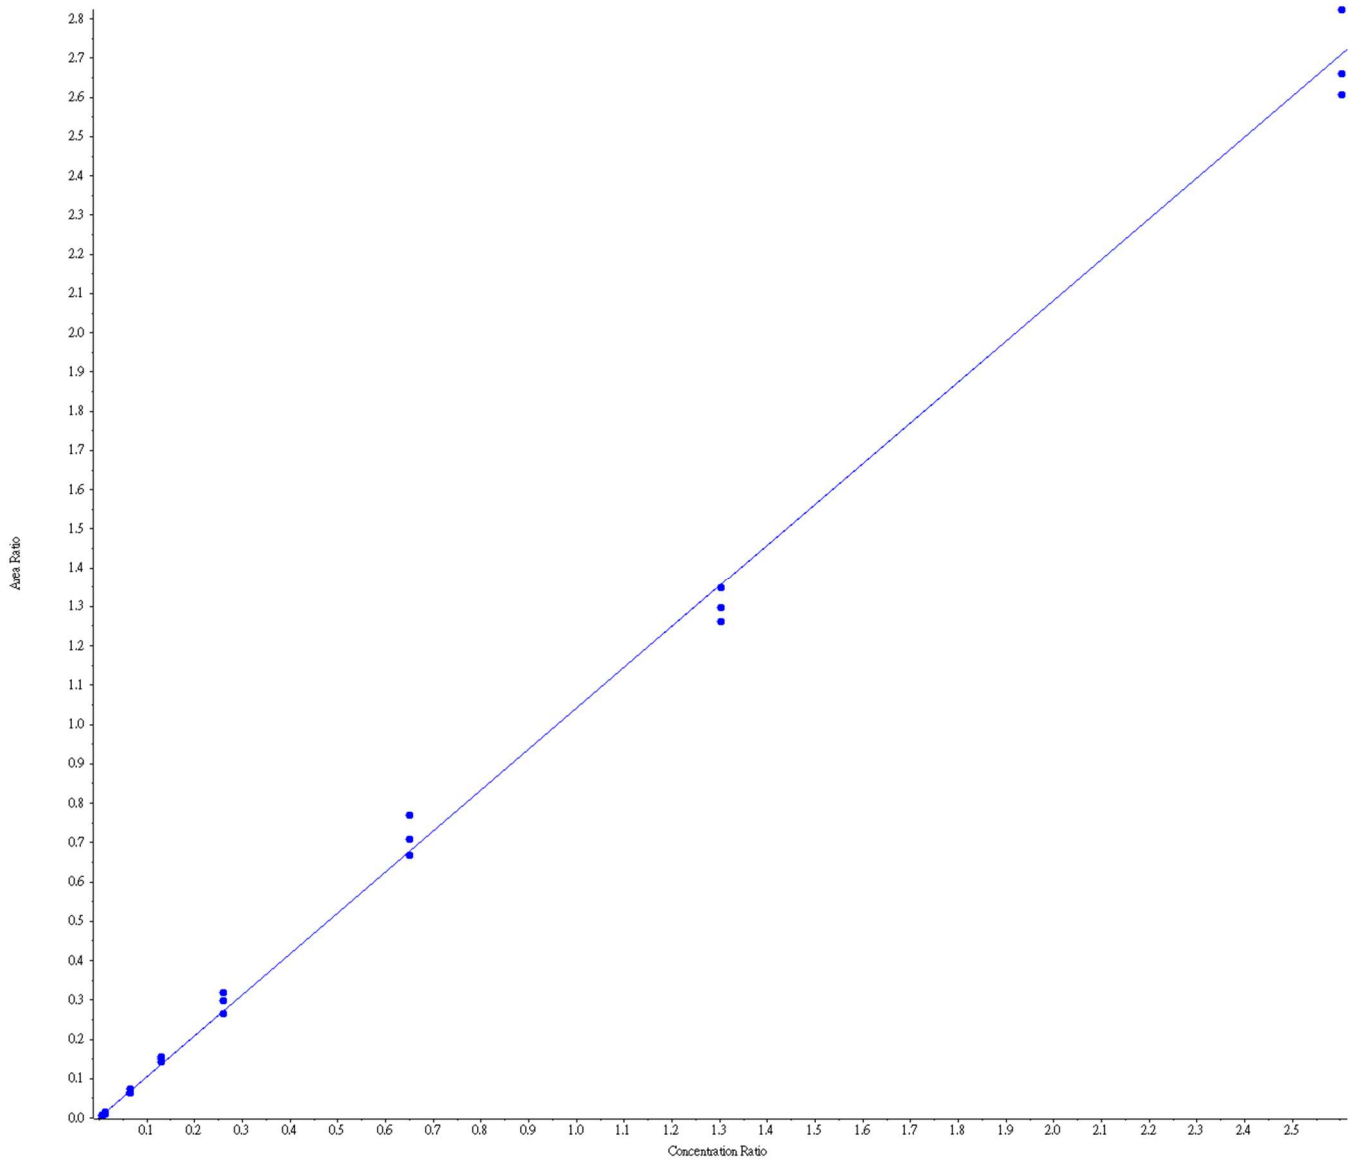

Analyte Name: KNG1.TVGSDFYFSFK.2/y9.M00

Calibration Equation:  $y = 1.00182 x + -0.00216$  ( $r = 0.99914$ ) (weighting:  $1 / x$ )

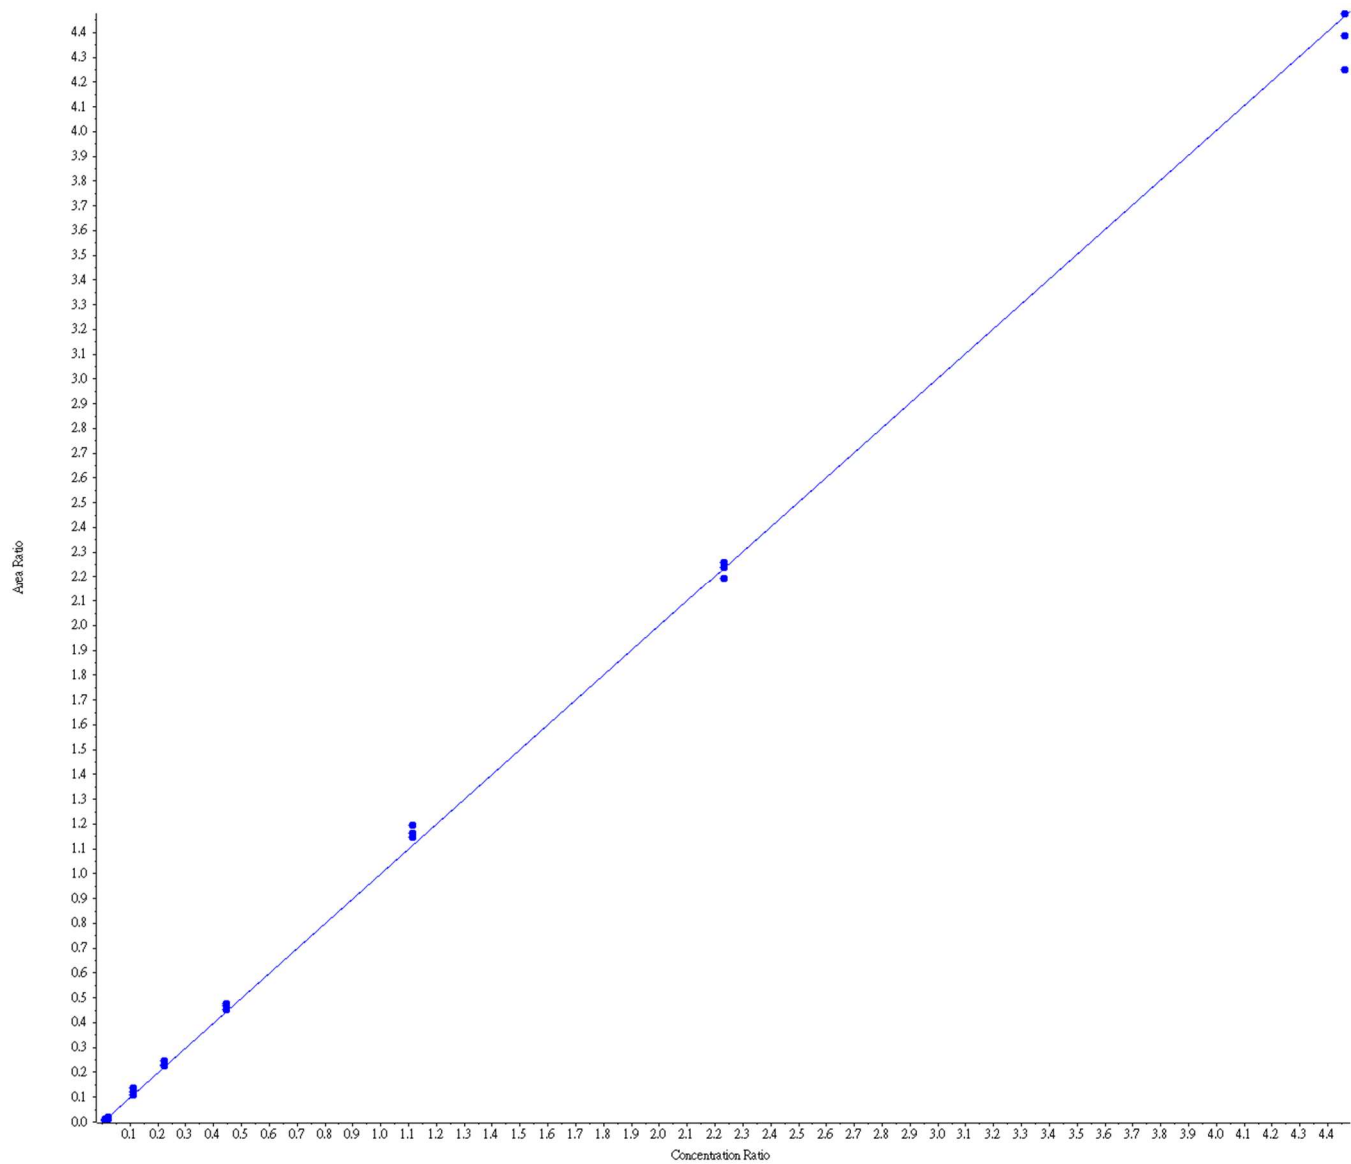

Analyte Name: RBP.YWGVASFLQK.2/y8.M00

Calibration Equation:  $y = 1.01000 x + -0.01037$  ( $r = 0.99820$ ) (weighting:  $1 / x$ )

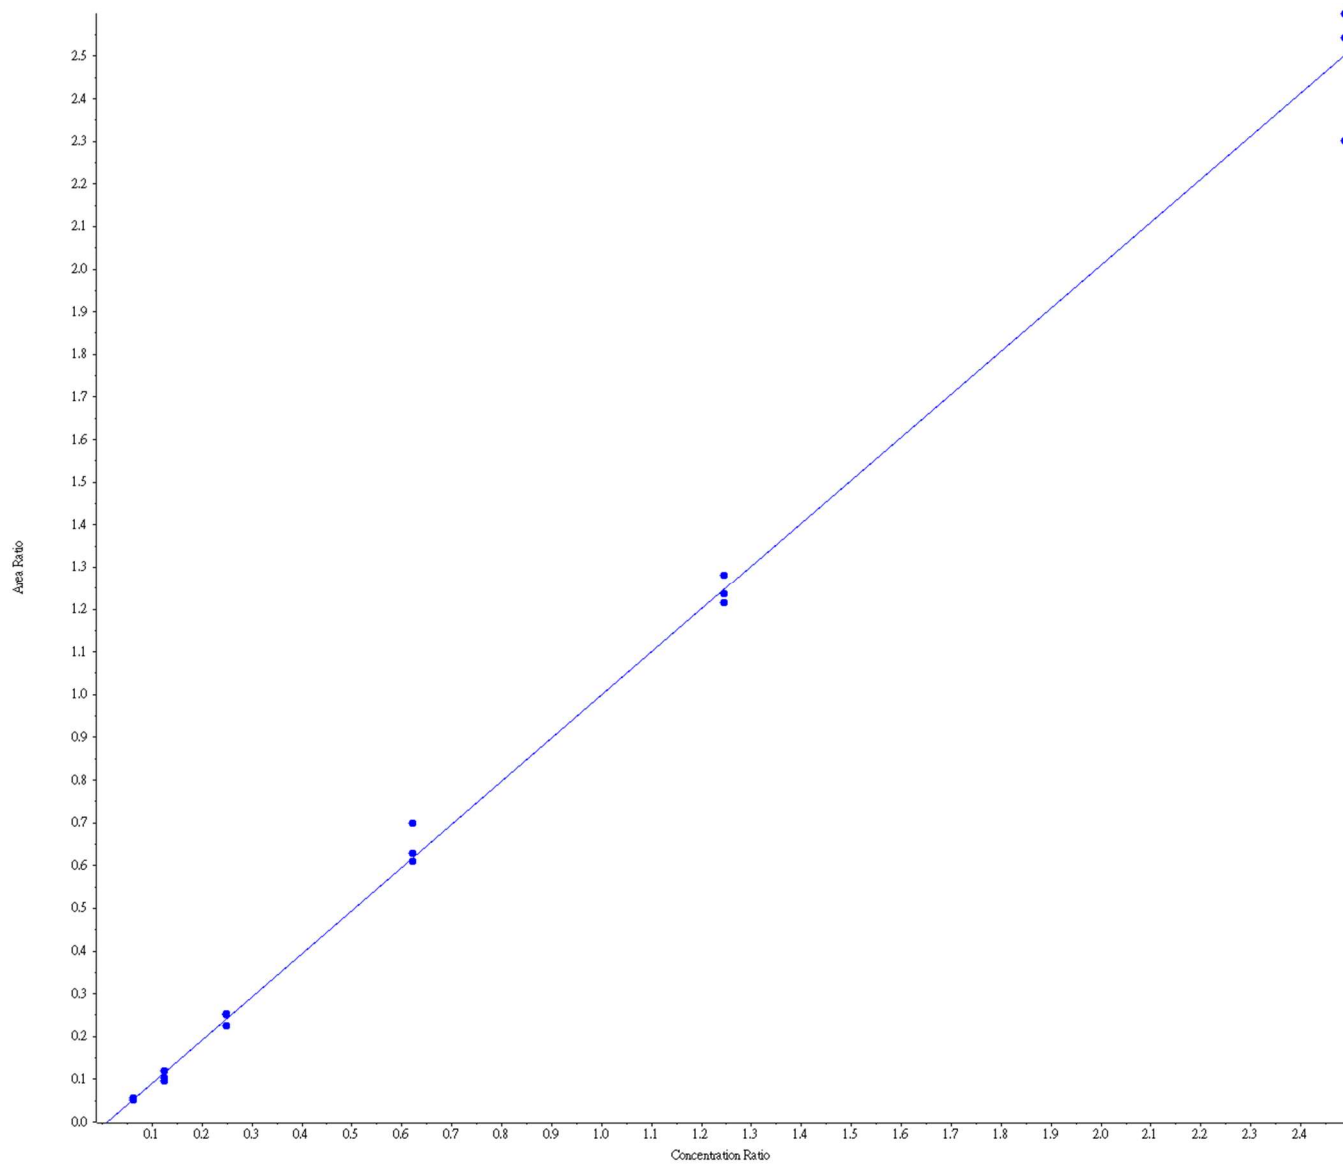

Analyte Name: SAMP.VGEYSLYIGR.2/y4.M00

Calibration Equation:  $y = 0.95859 x + -9.80920e-4$  ( $r = 0.99010$ ) (weighting:  $1 / x$ )

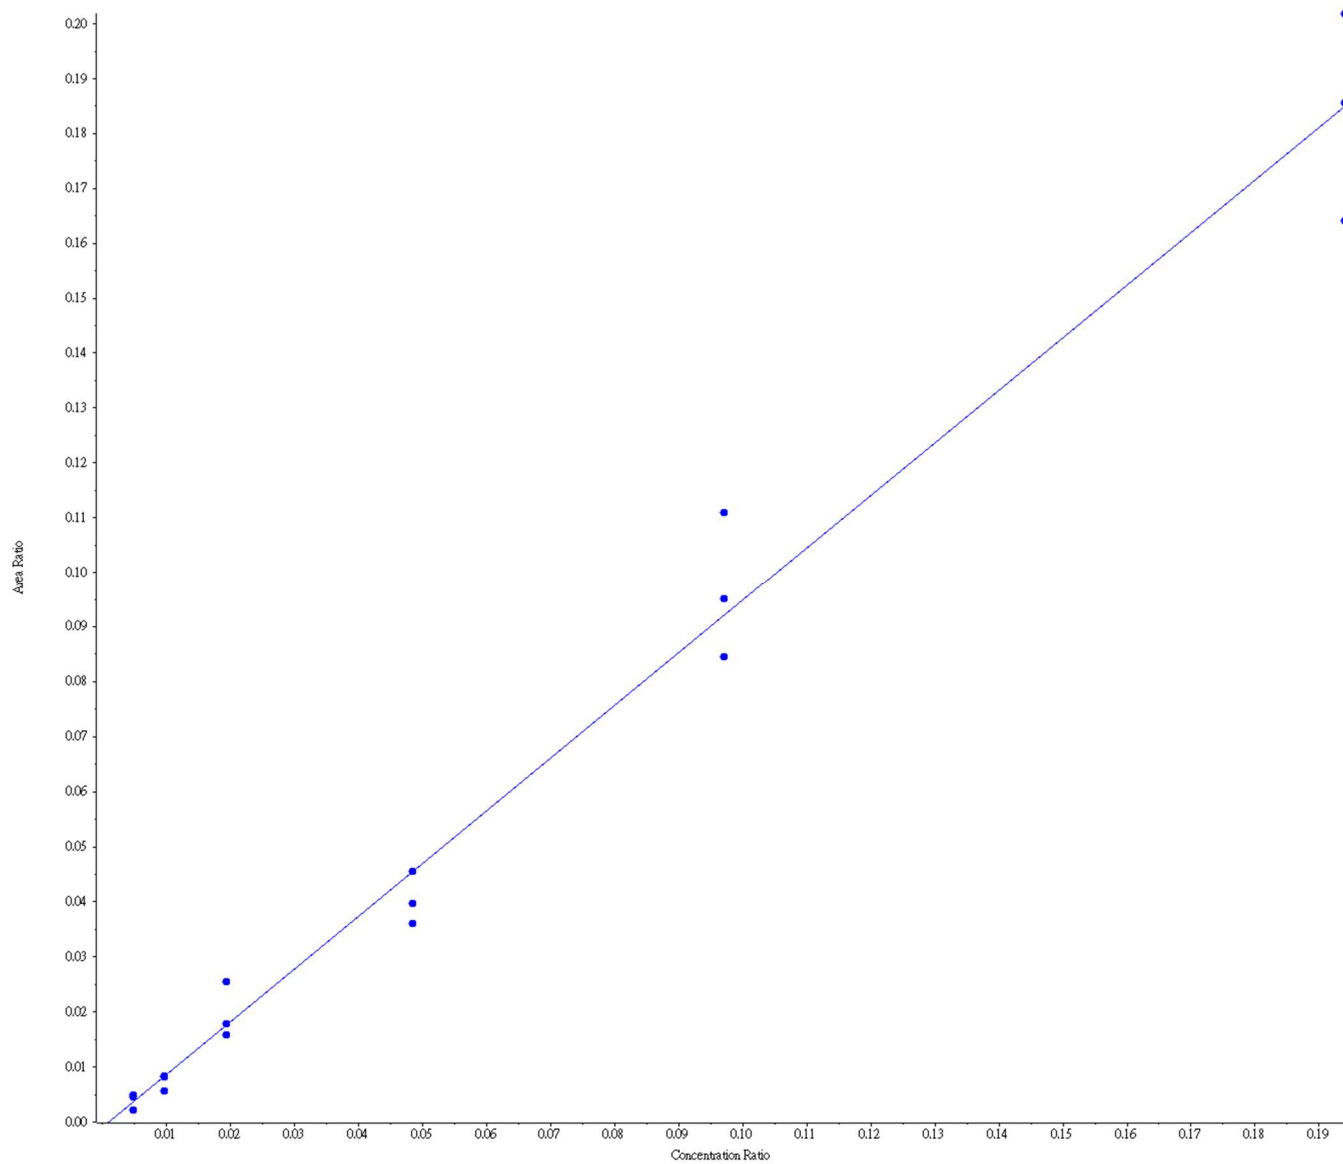

Analyte Name: ZA2G.EIPAWVPFDPAQITK.2/y10.M00

Calibration Equation:  $y = 1.17735 x + -0.05614$  ( $r = 0.98824$ ) (weighting:  $1 / x$ )

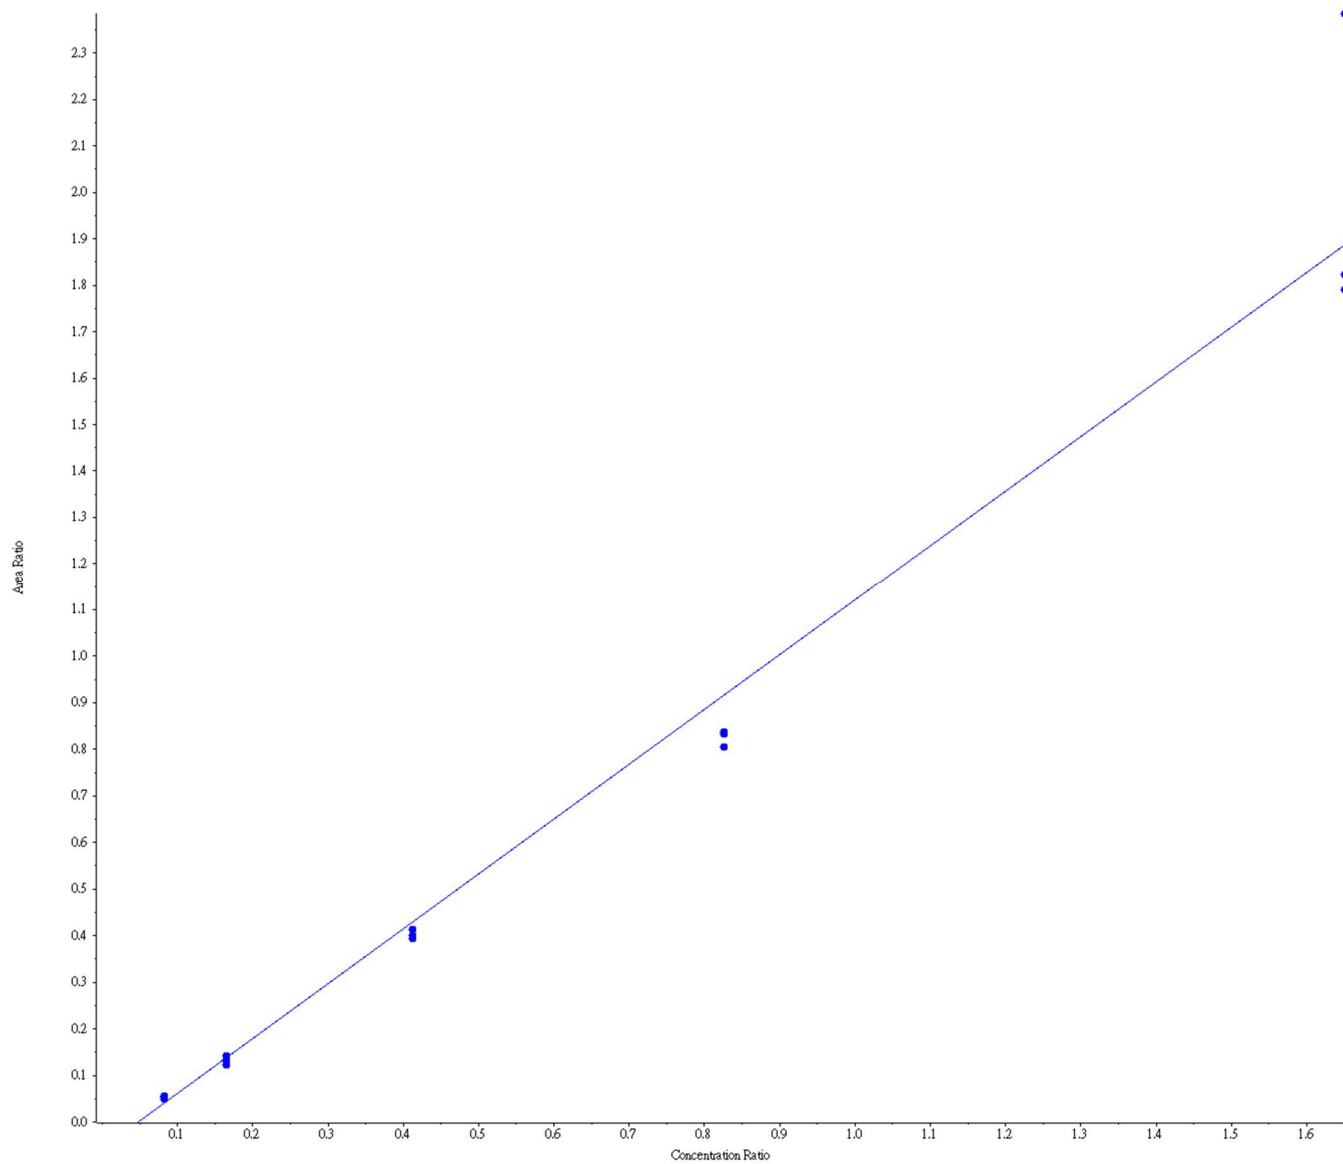



Analyte Name: FA12.VVGLVALR.2/y7.M00

Calibration Equation:  $y = 0.81853 x + 0.00508$  ( $r = 0.98795$ ) (weighting:  $1 / x$ )

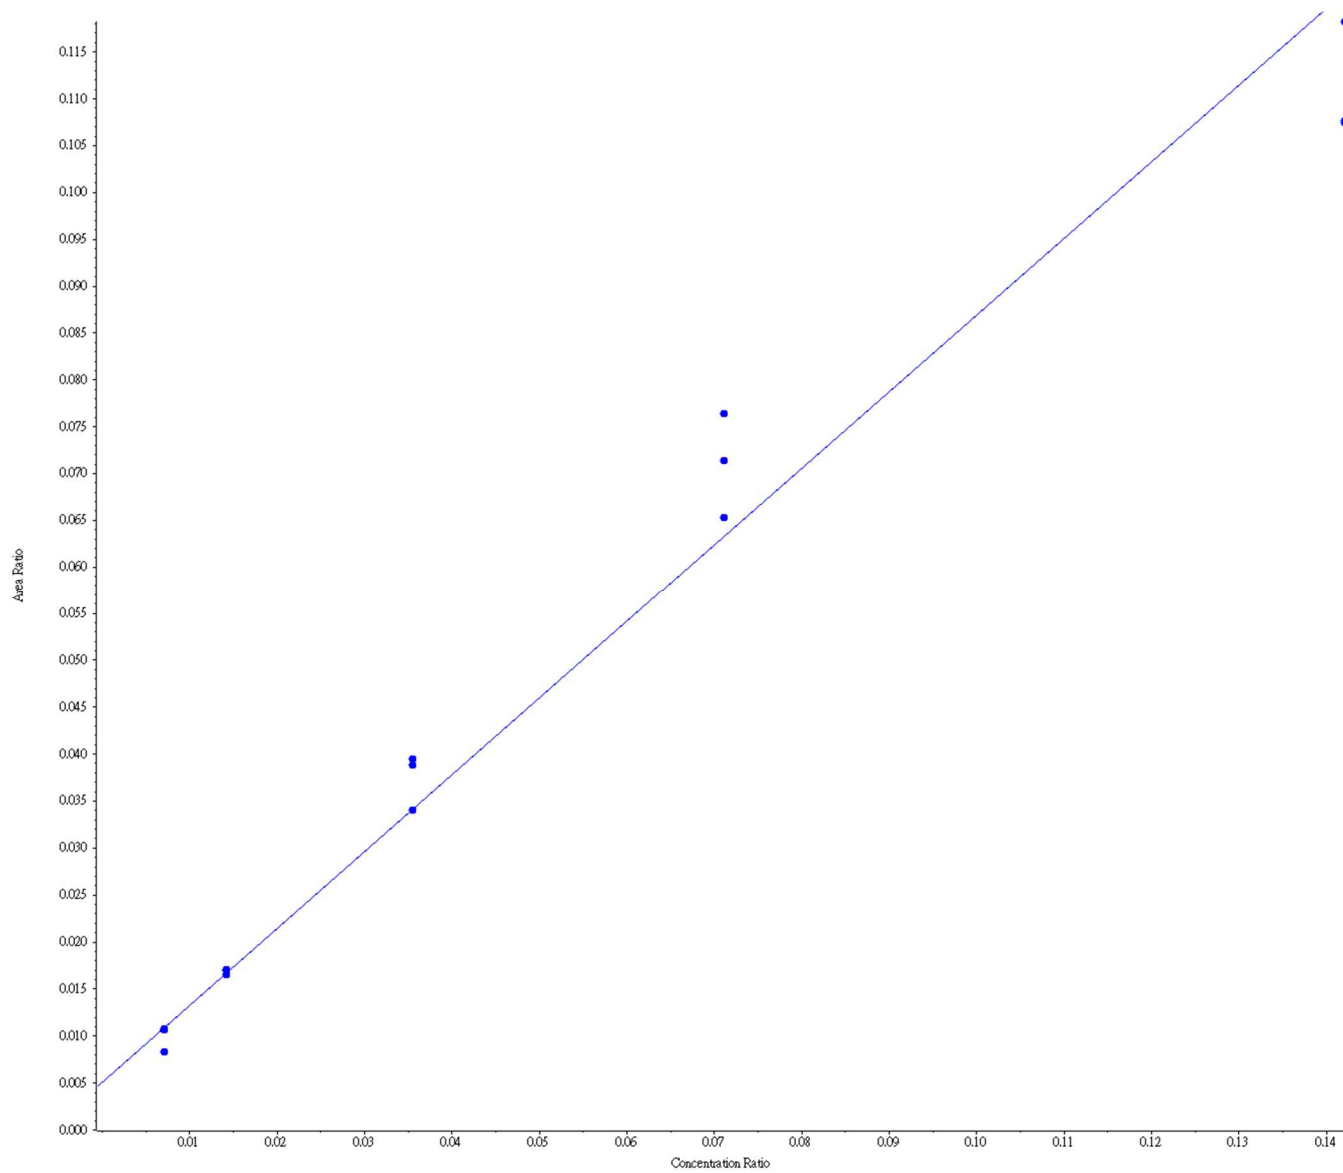

Analyte Name: CO3.TGLQEVEVK.2/y6.M00

Calibration Equation:  $y = 1.00505 x + -4.91033e-4$  (r = 0.99951) (weighting: 1 / x)

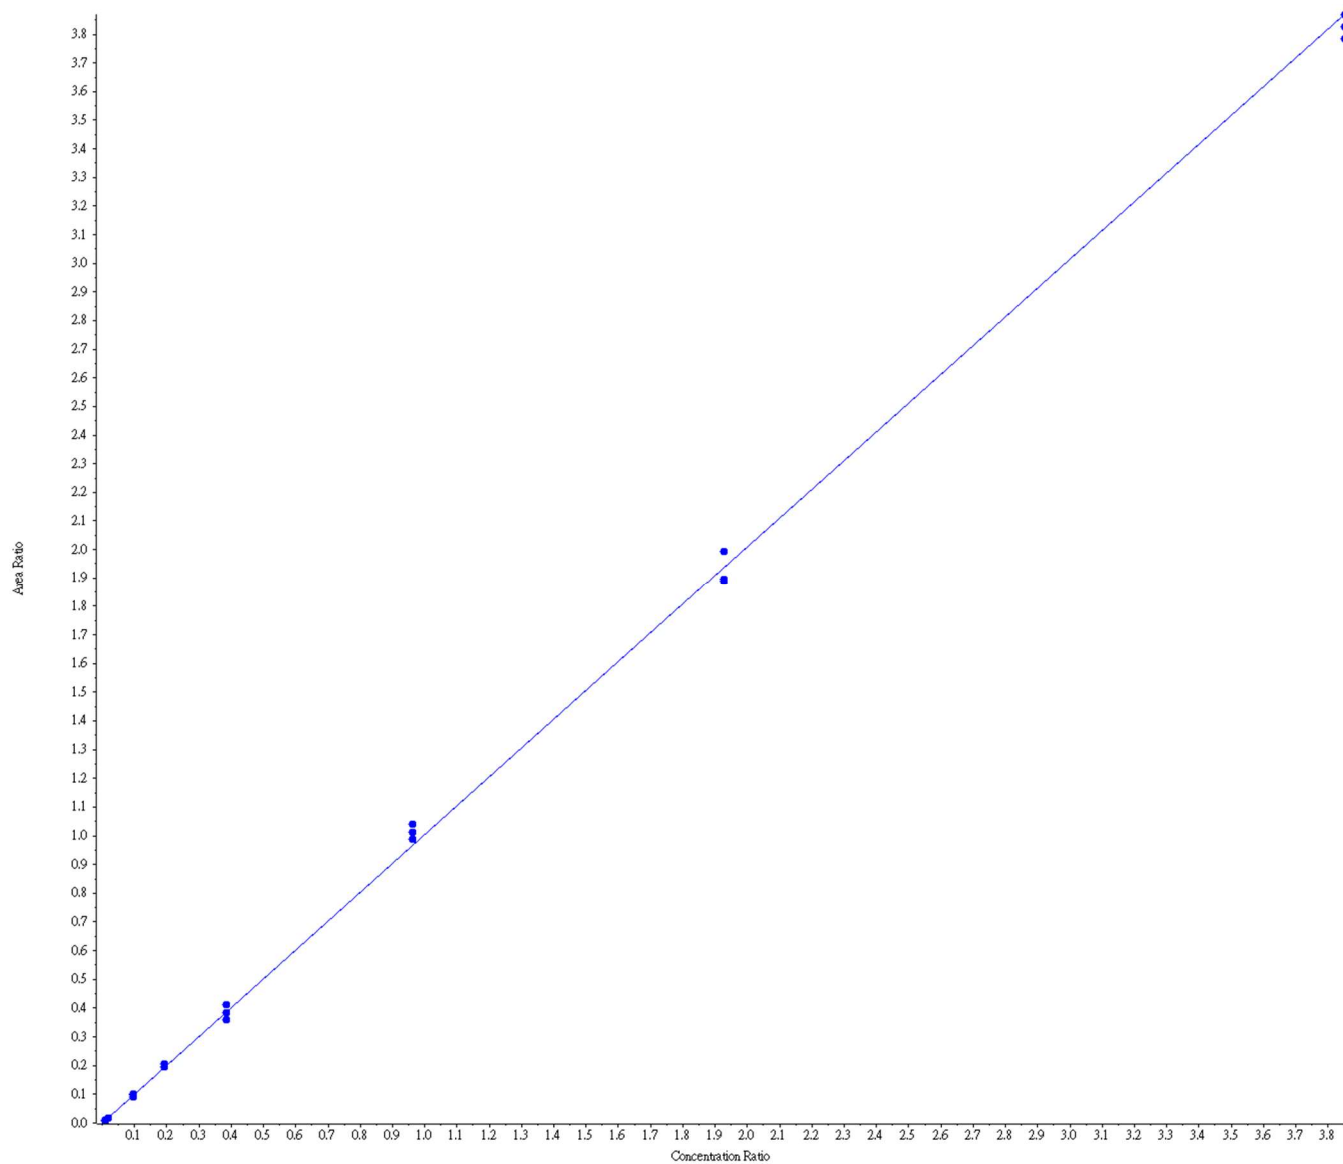

Analyte Name: **FINC.VPGTSTSATLTGLTR.2/y14(2+).M00**

Calibration Equation:  $y = 1.04893 x + -0.00250$  ( $r = 0.99870$ ) (weighting:  $1 / x$ )

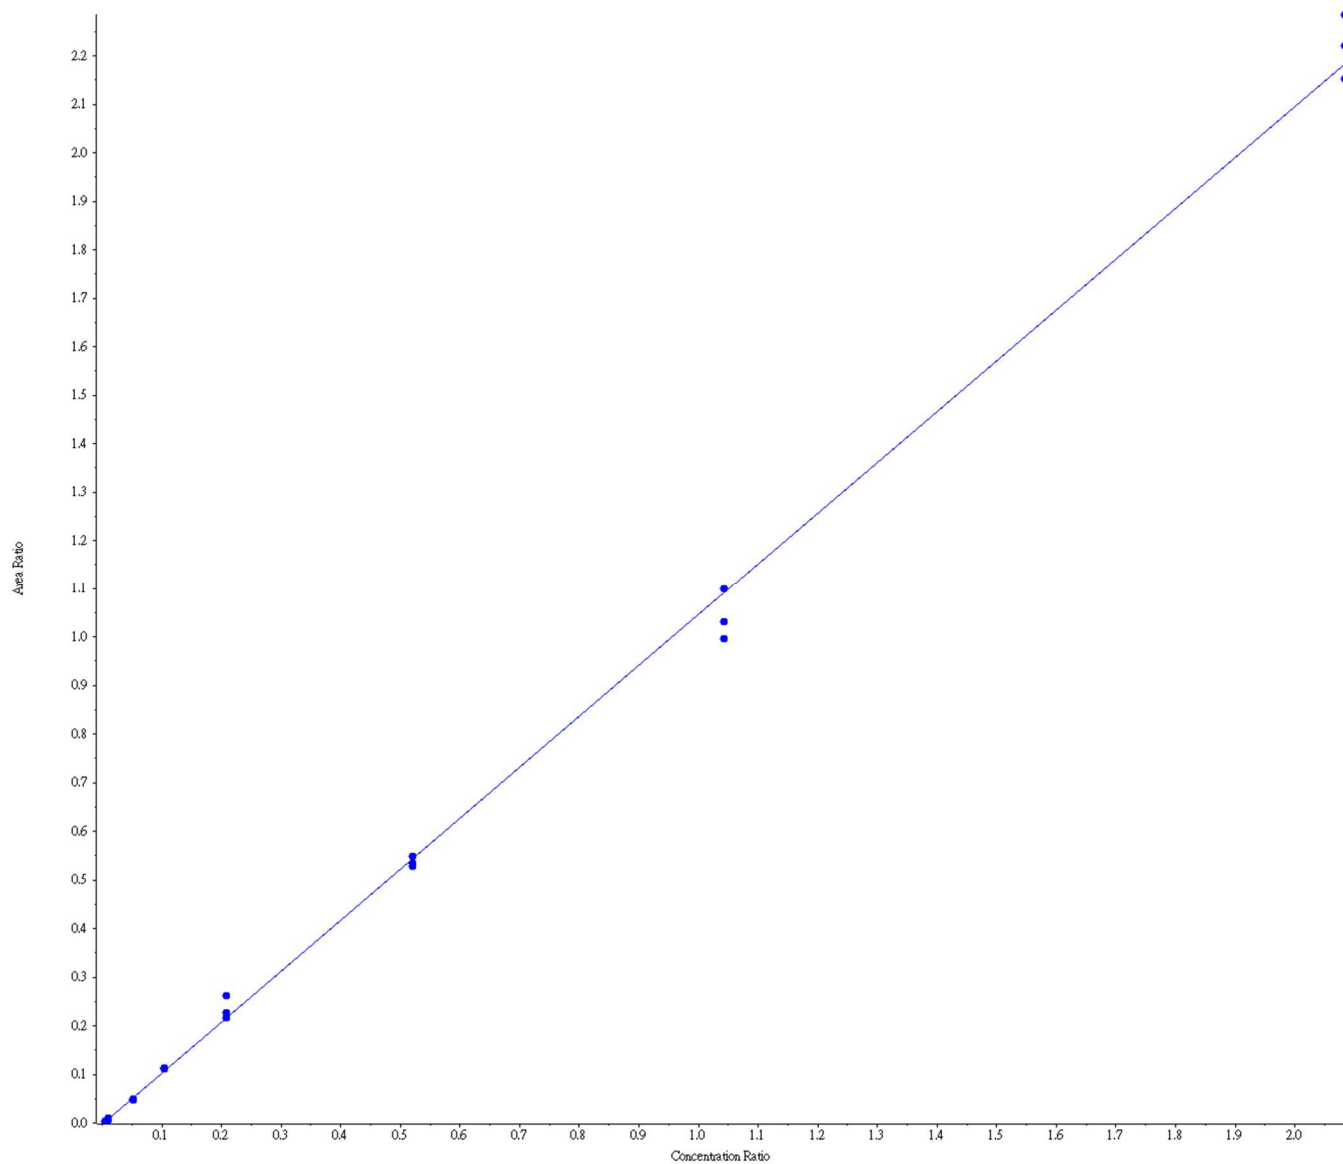

Analyte Name: HPT.VGYVSGWGR.2/y5.M00

Calibration Equation:  $y = 1.08141 x + -0.00123$  ( $r = 0.99570$ ) (weighting:  $1 / x$ )

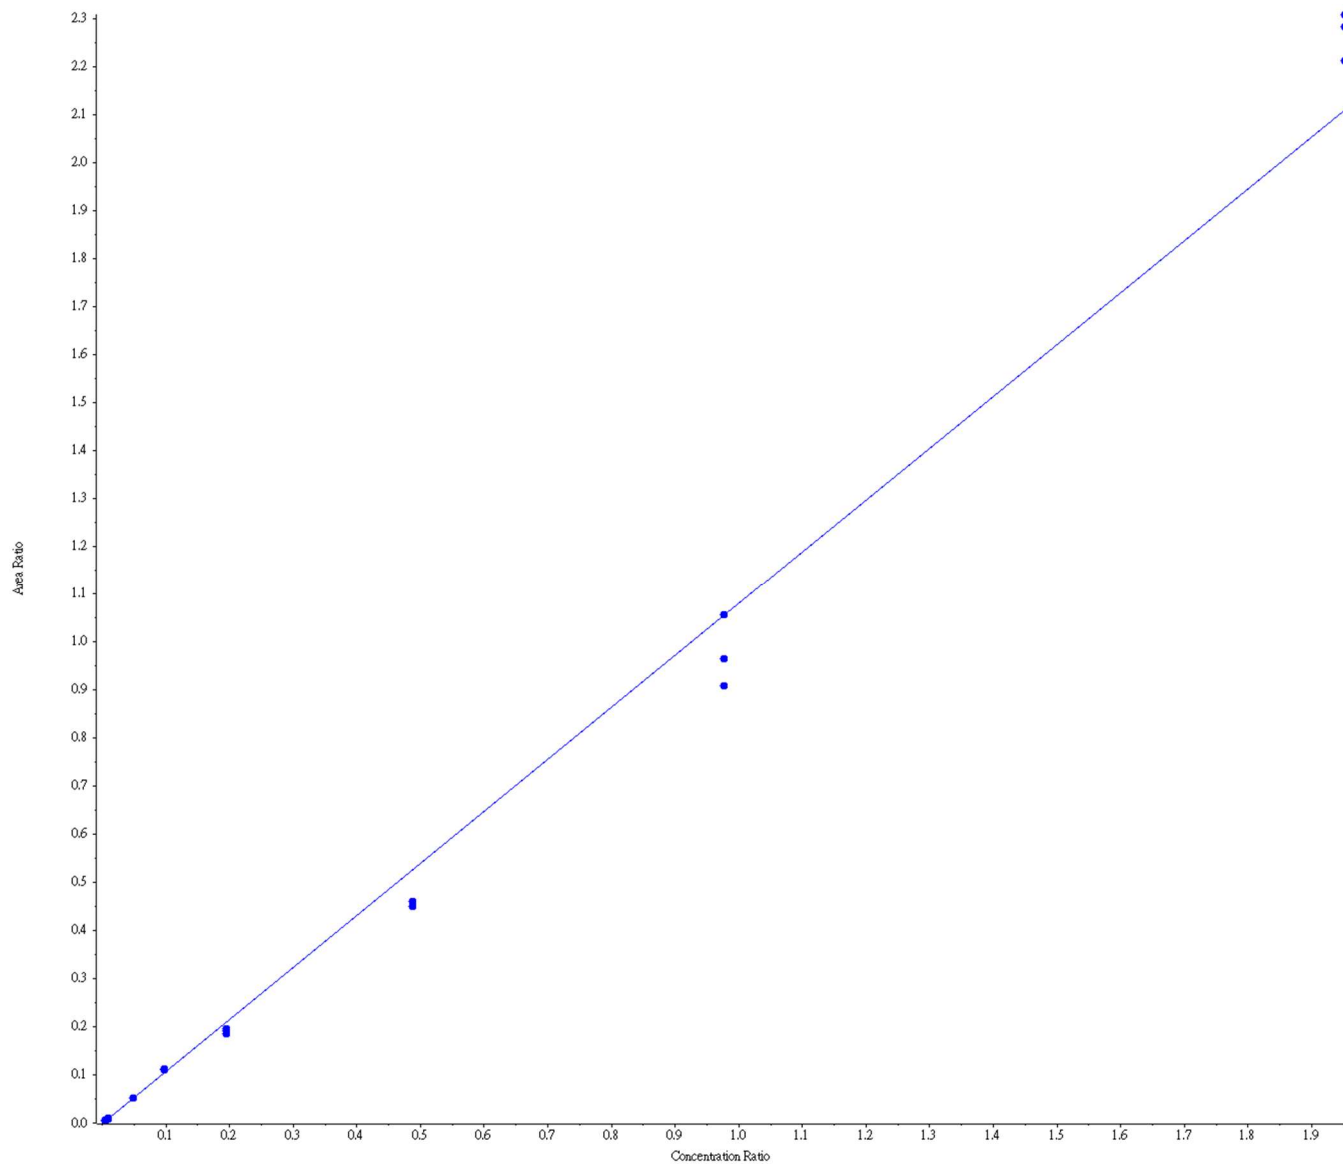

Analyte Name: HEMO.NFPSPVDAEFR.2/y9(2+).M00

Calibration Equation:  $y = 0.98605 x + 2.47303e-4$  ( $r = 0.99968$ ) (weighting: 1 / x)

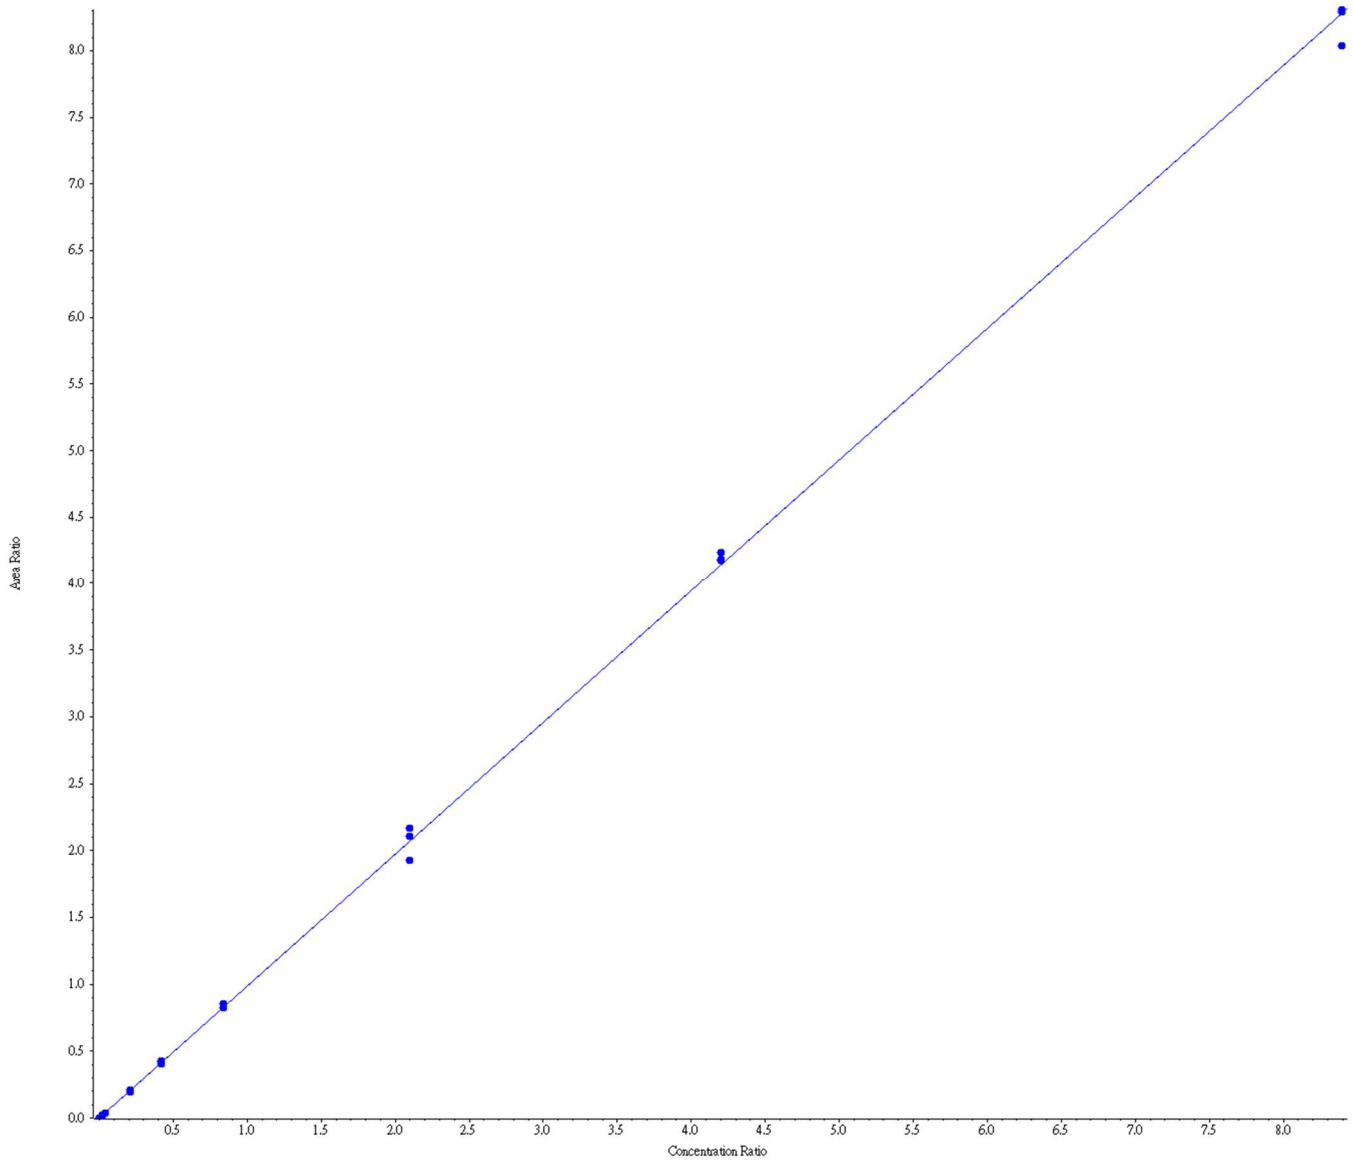

Analyte Name: HRG.DGYLFQLLR.2/y5.M00

Calibration Equation:  $y = 1.03138x + 4.24995e-4$  ( $r = 0.99803$ ) (weighting:  $1/x$ )

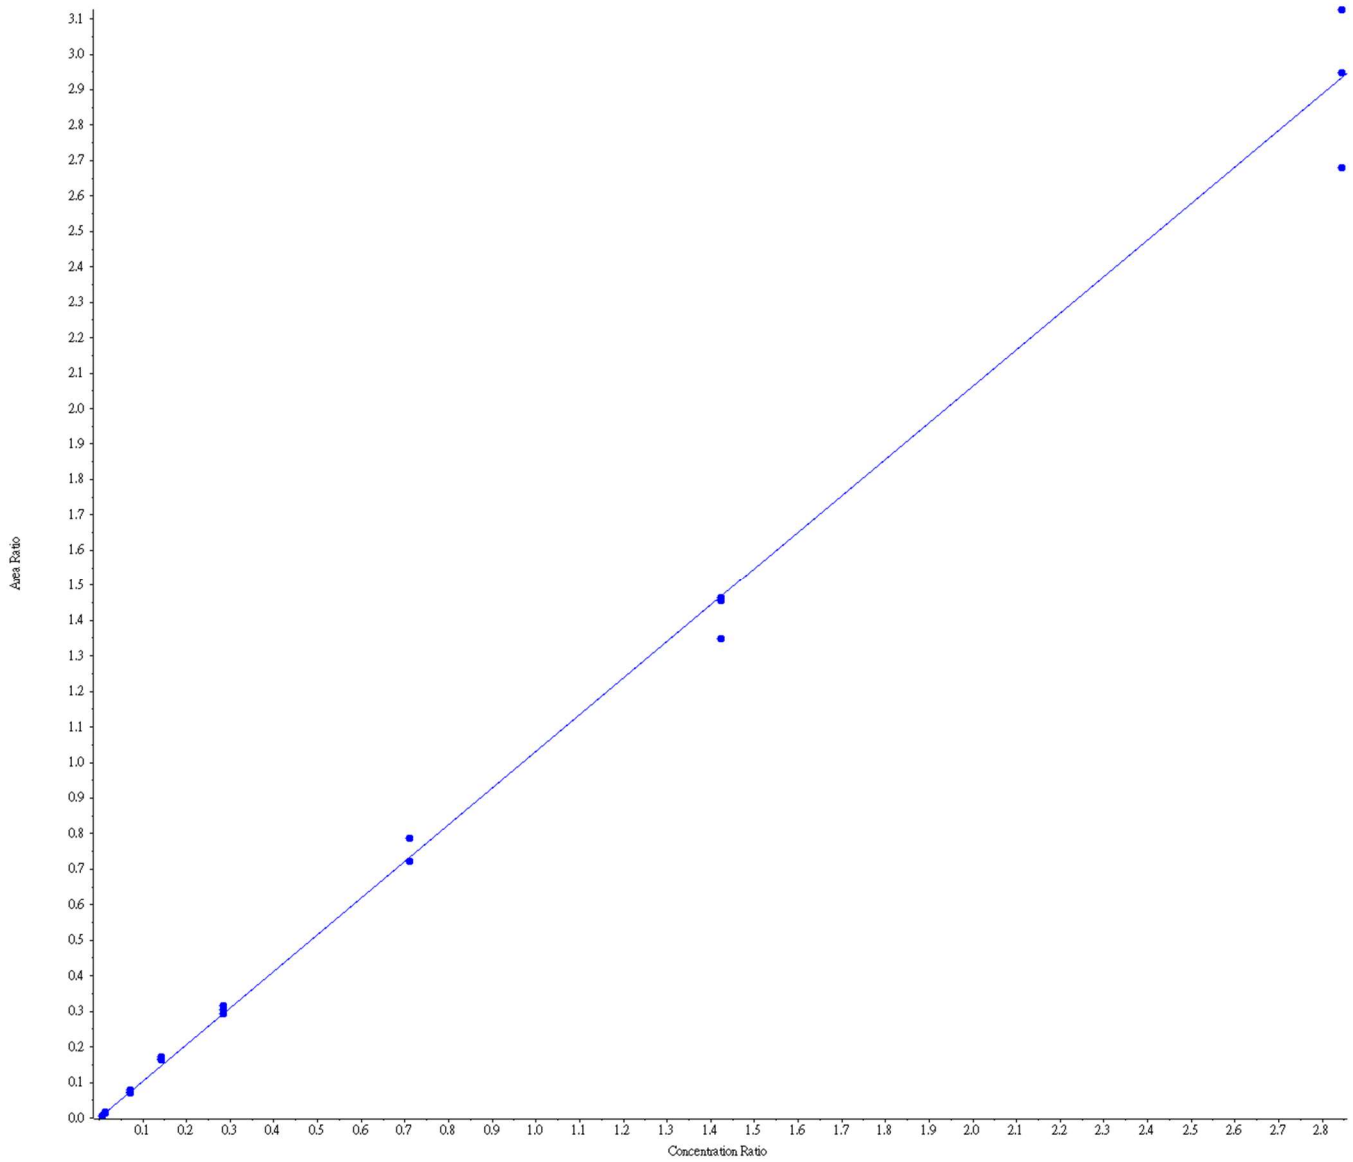

Analyte Name: Q9UJ43.AEIEYLEK.2/y6.M00

Calibration Equation:  $y = 0.95713x + -0.00503$  ( $r = 0.98935$ ) (weighting:  $1/x$ )

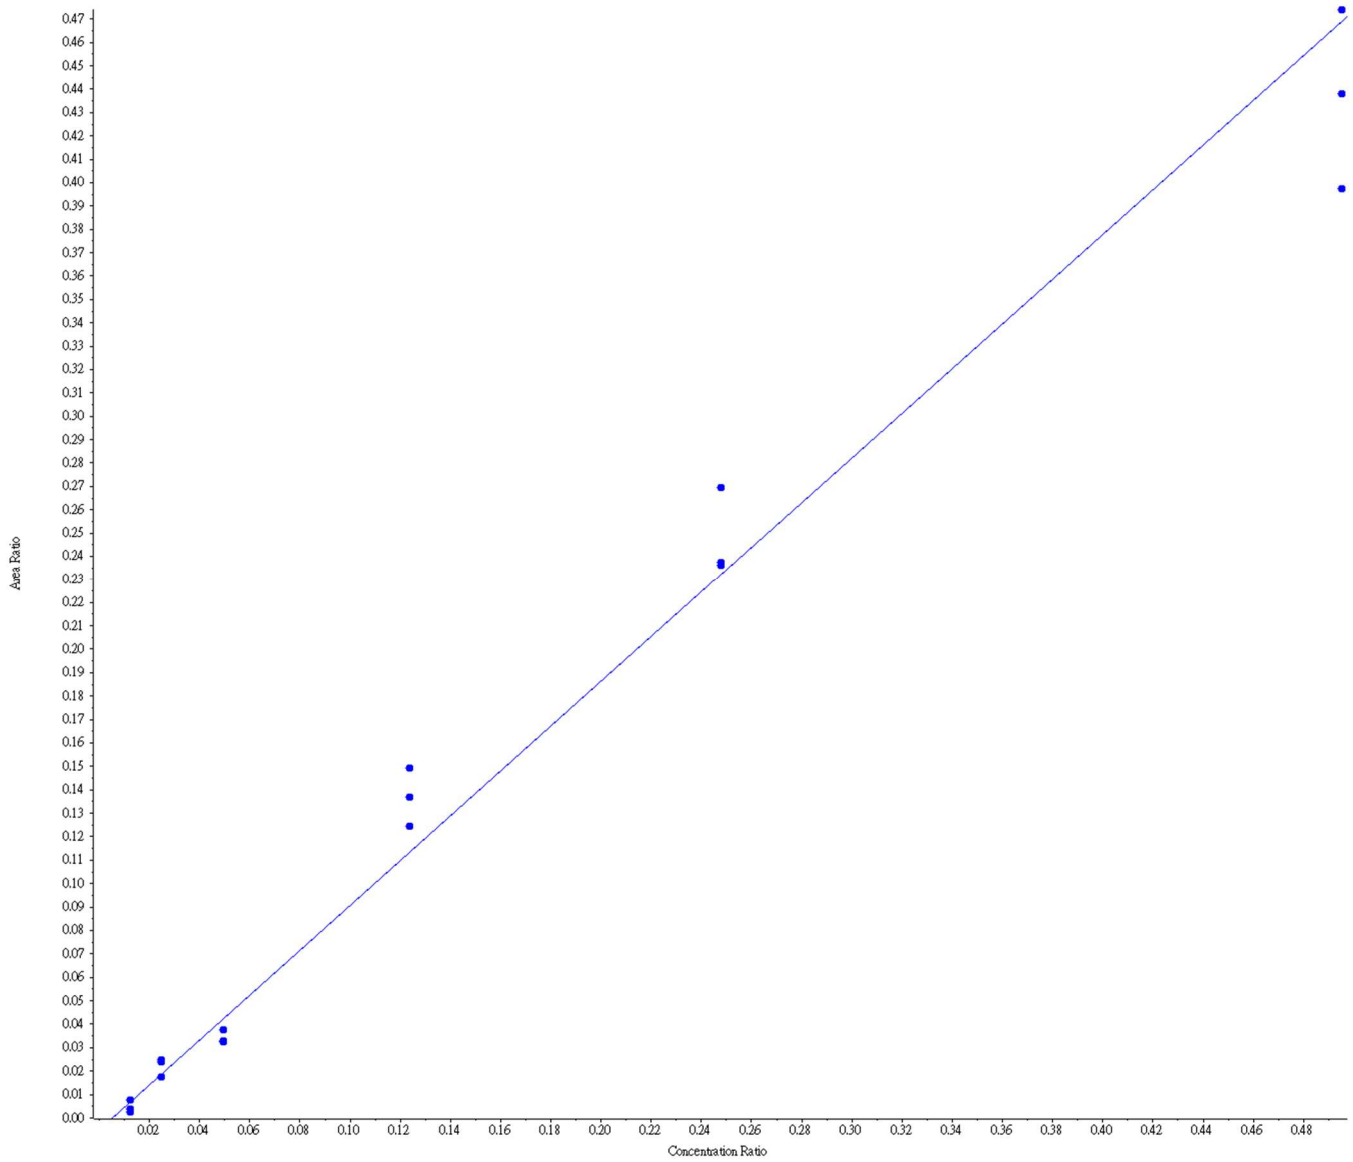

Analyte Name: VTNC.FEDGVLPDYPR.2/y7.M00

Calibration Equation:  $y = 0.99153x + -0.00406$  ( $r = 0.99707$ ) (weighting:  $1/x$ )

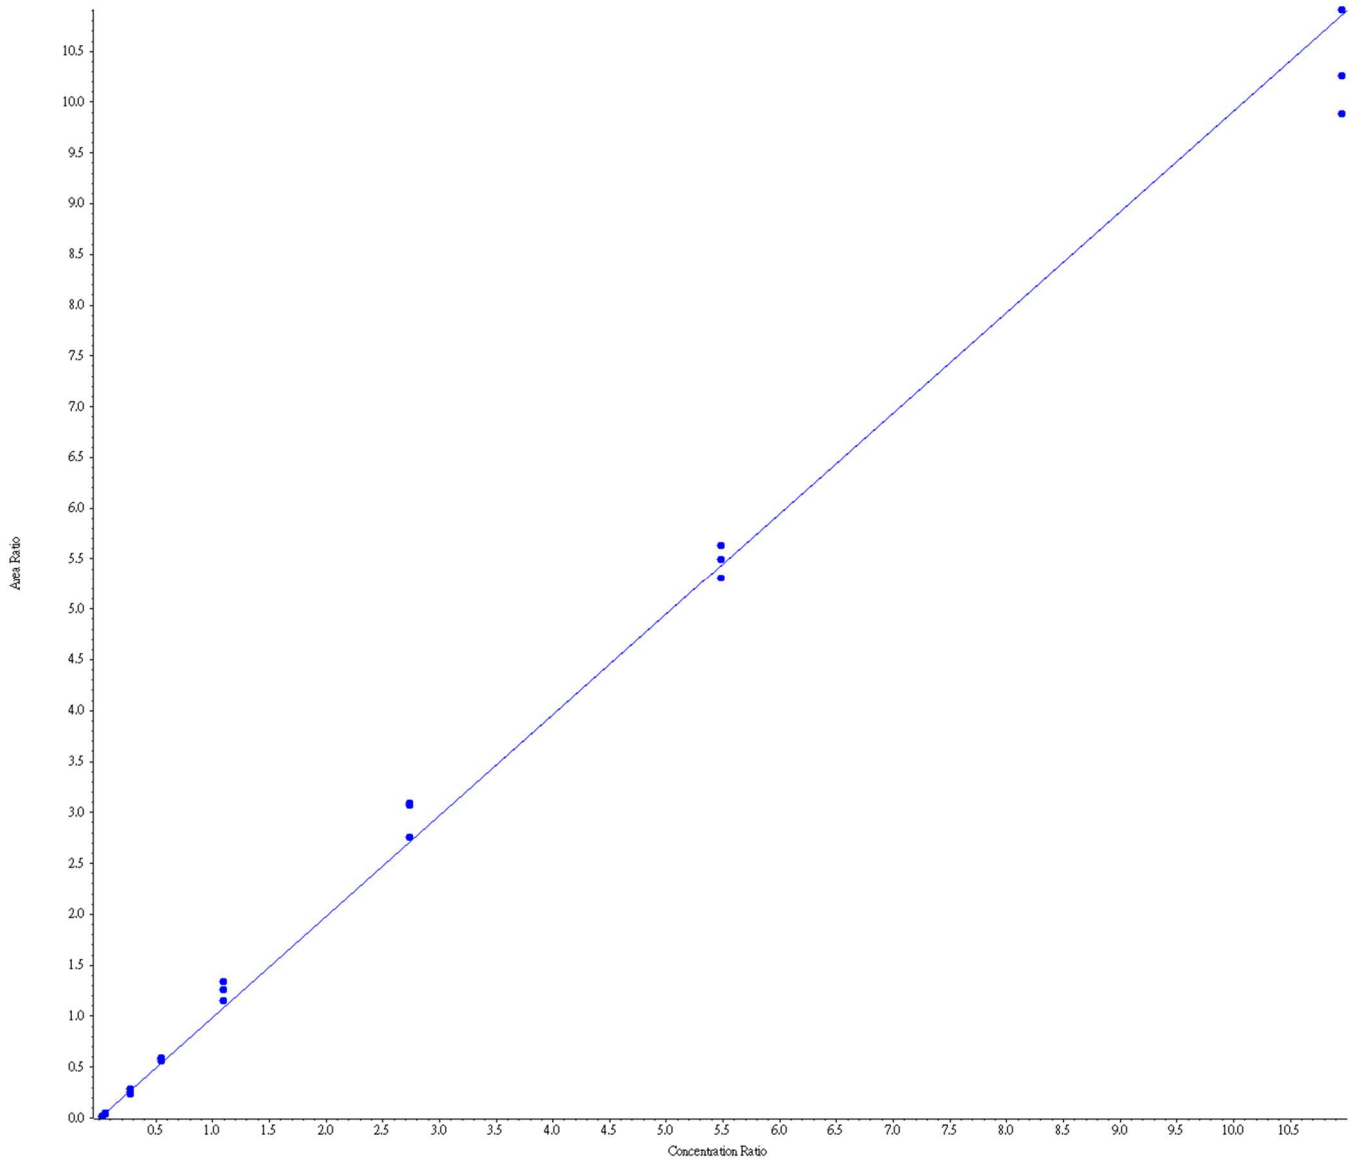



Analyte Name: FPA.ADSGEGDFLAEGGGVR.2/y7.M00

Calibration Equation:  $y = 0.98725 x + -0.00792$  ( $r = 0.99030$ ) (weighting:  $1 / x$ )

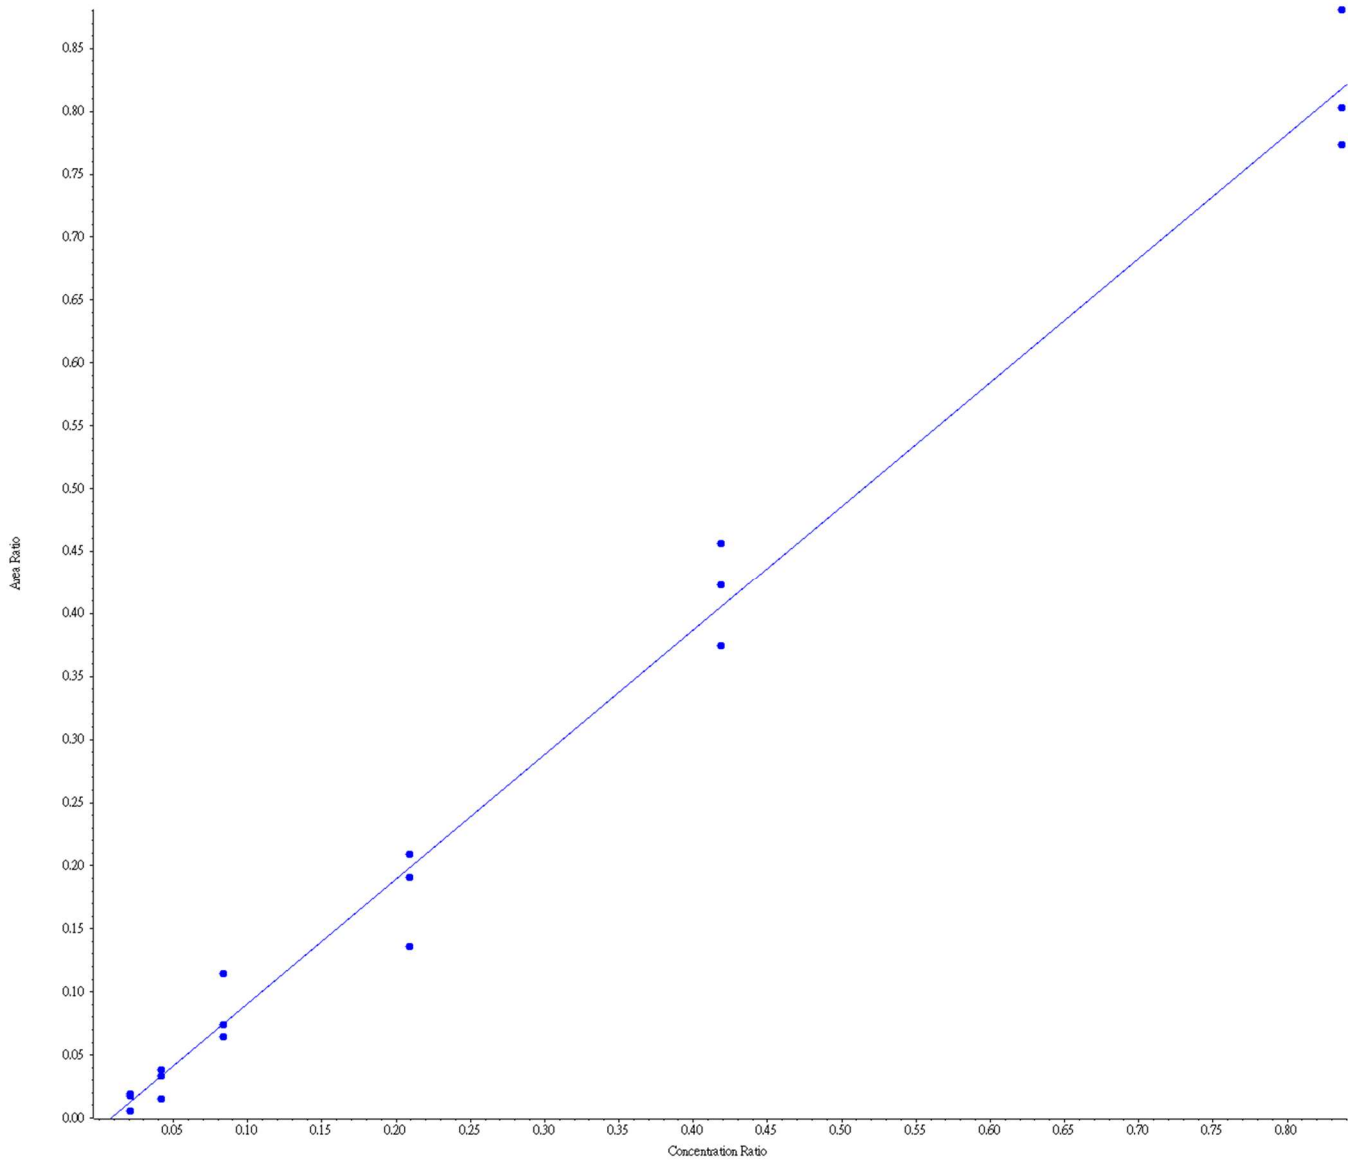

**Supplemental Figure S1B.** The LLOD and quantifiable concentration points in the standard curves of the 56 targeted endogenous peptide/proteins.

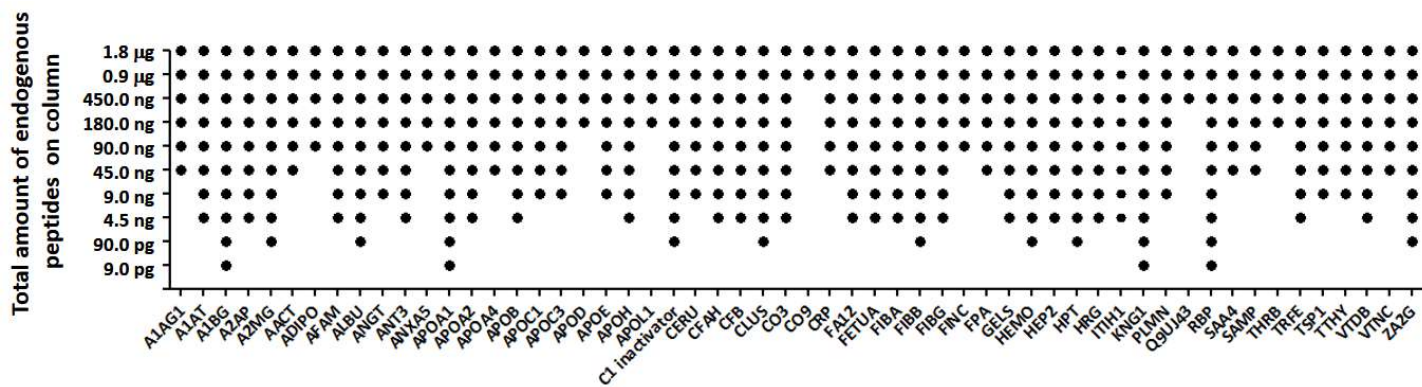

**Supplemental Figure S1C** Concentration distributions of the 56 proteins in the two clinical states (control and oral cancer), expressed as fmol/ $\mu$ g.

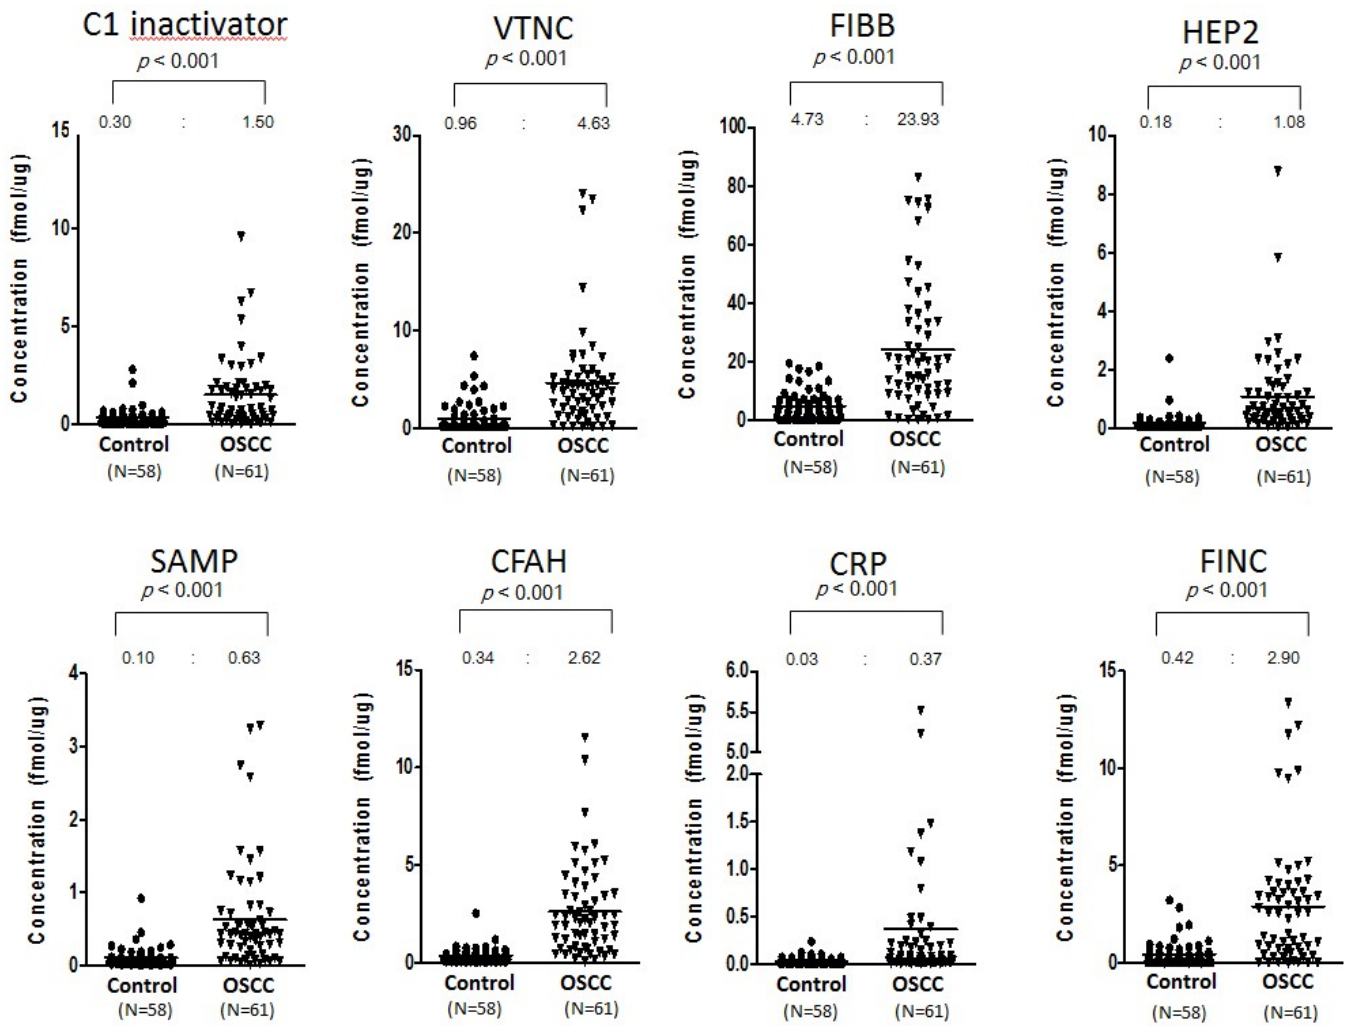

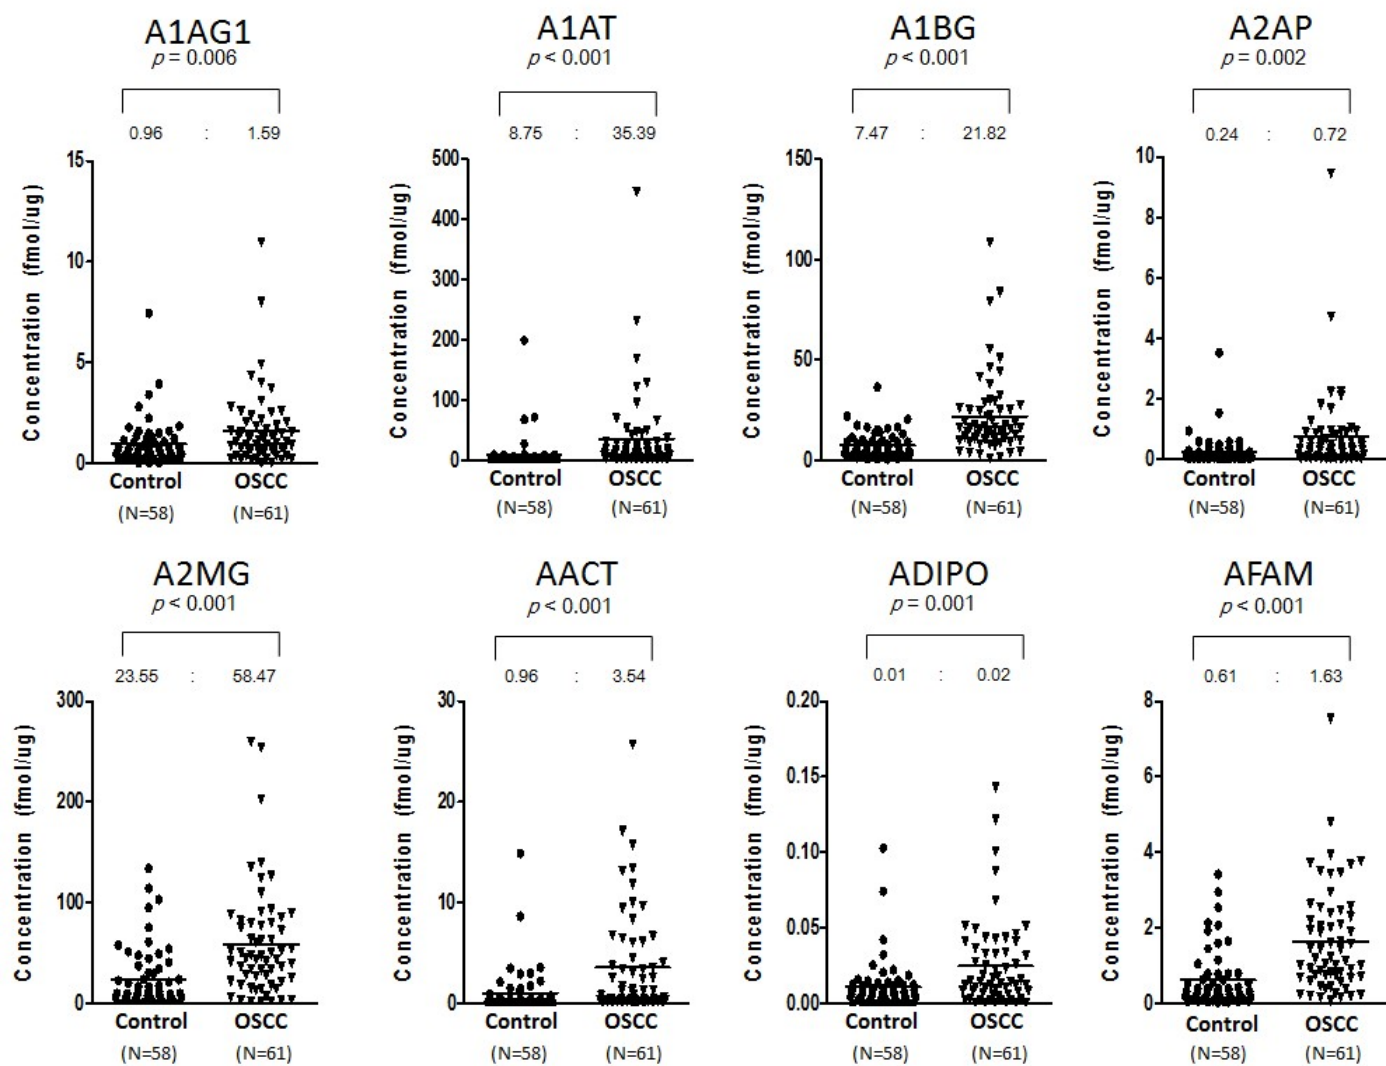

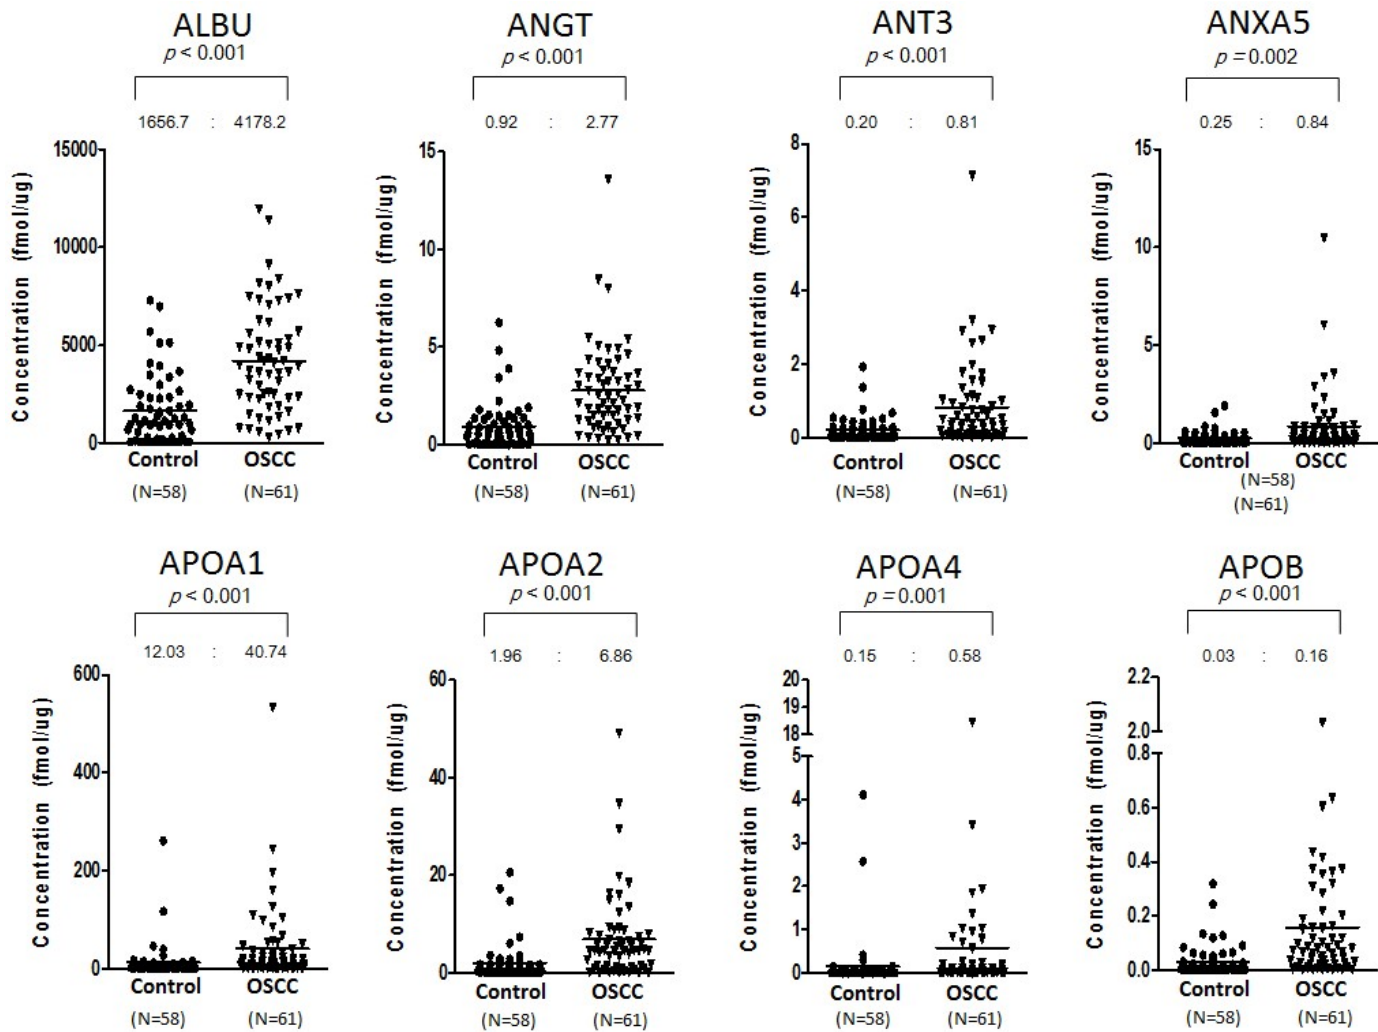

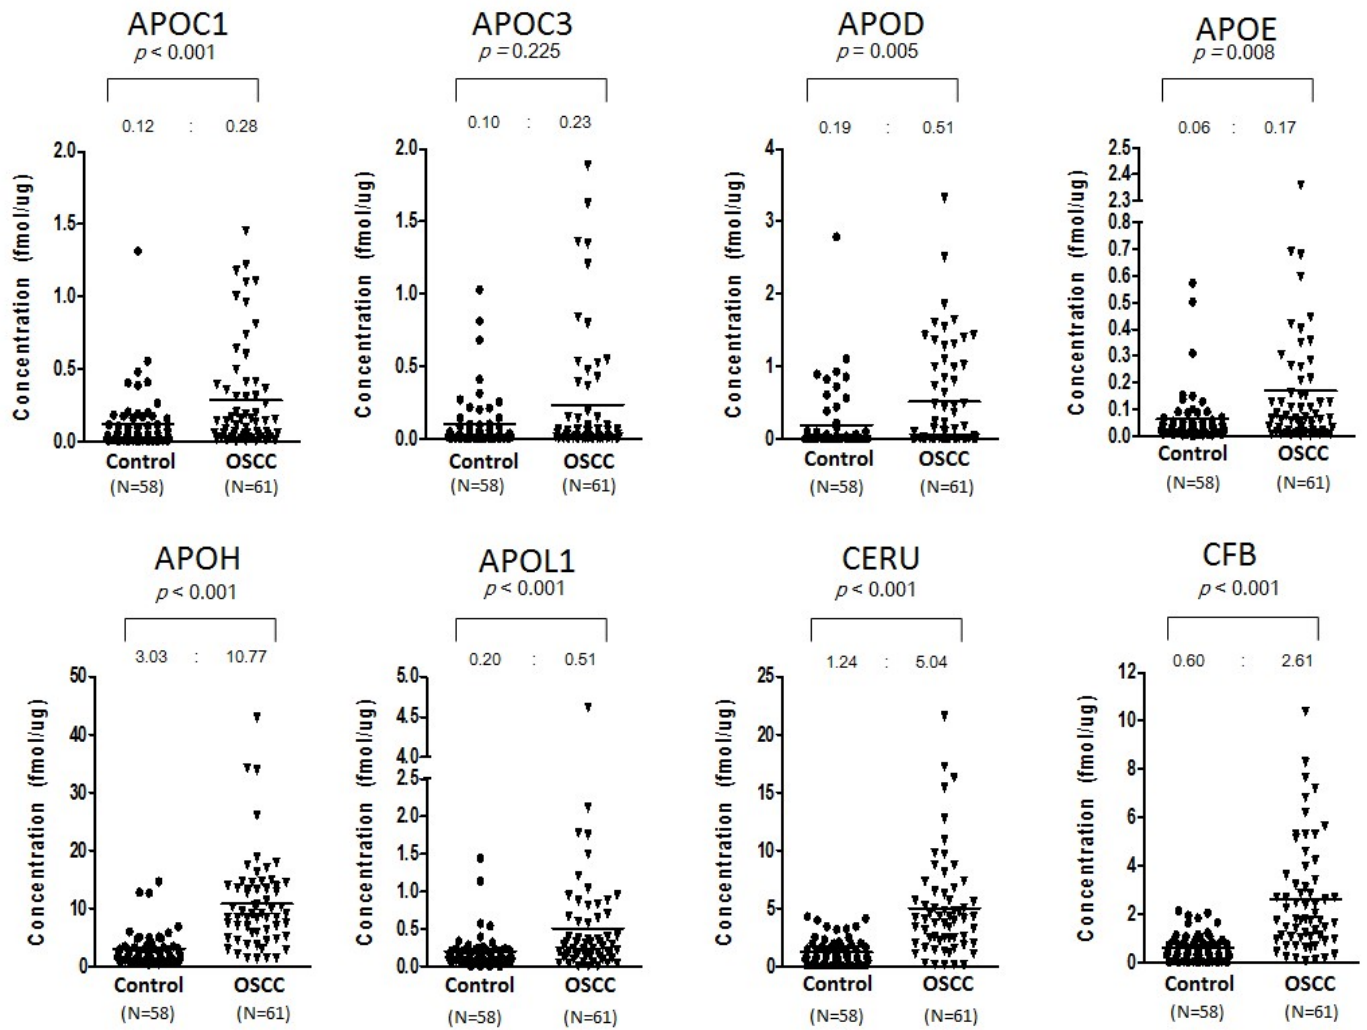

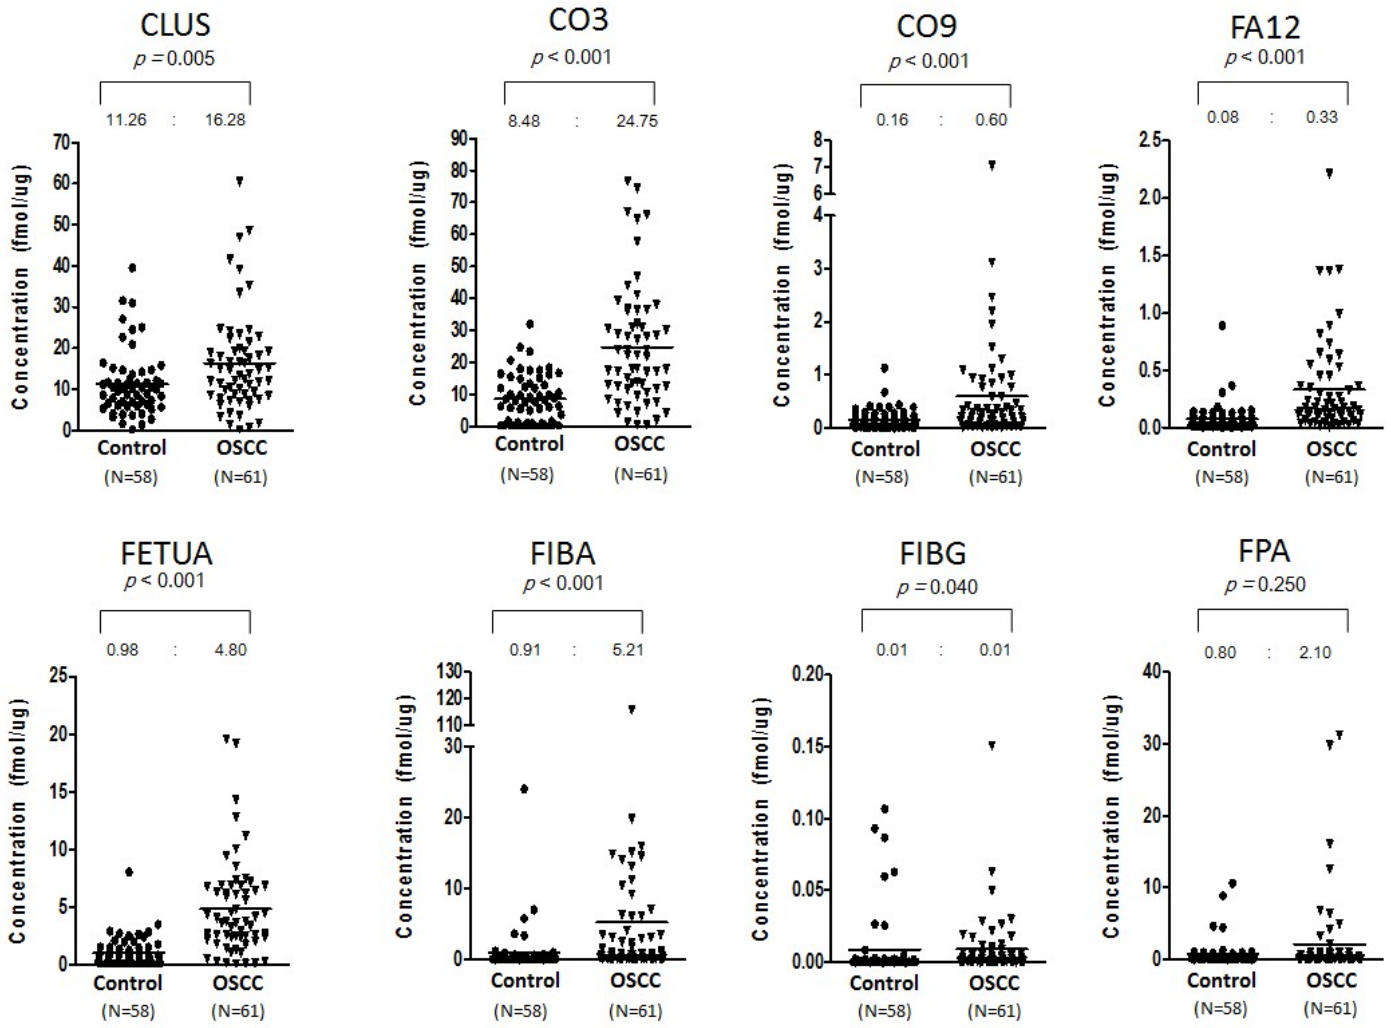

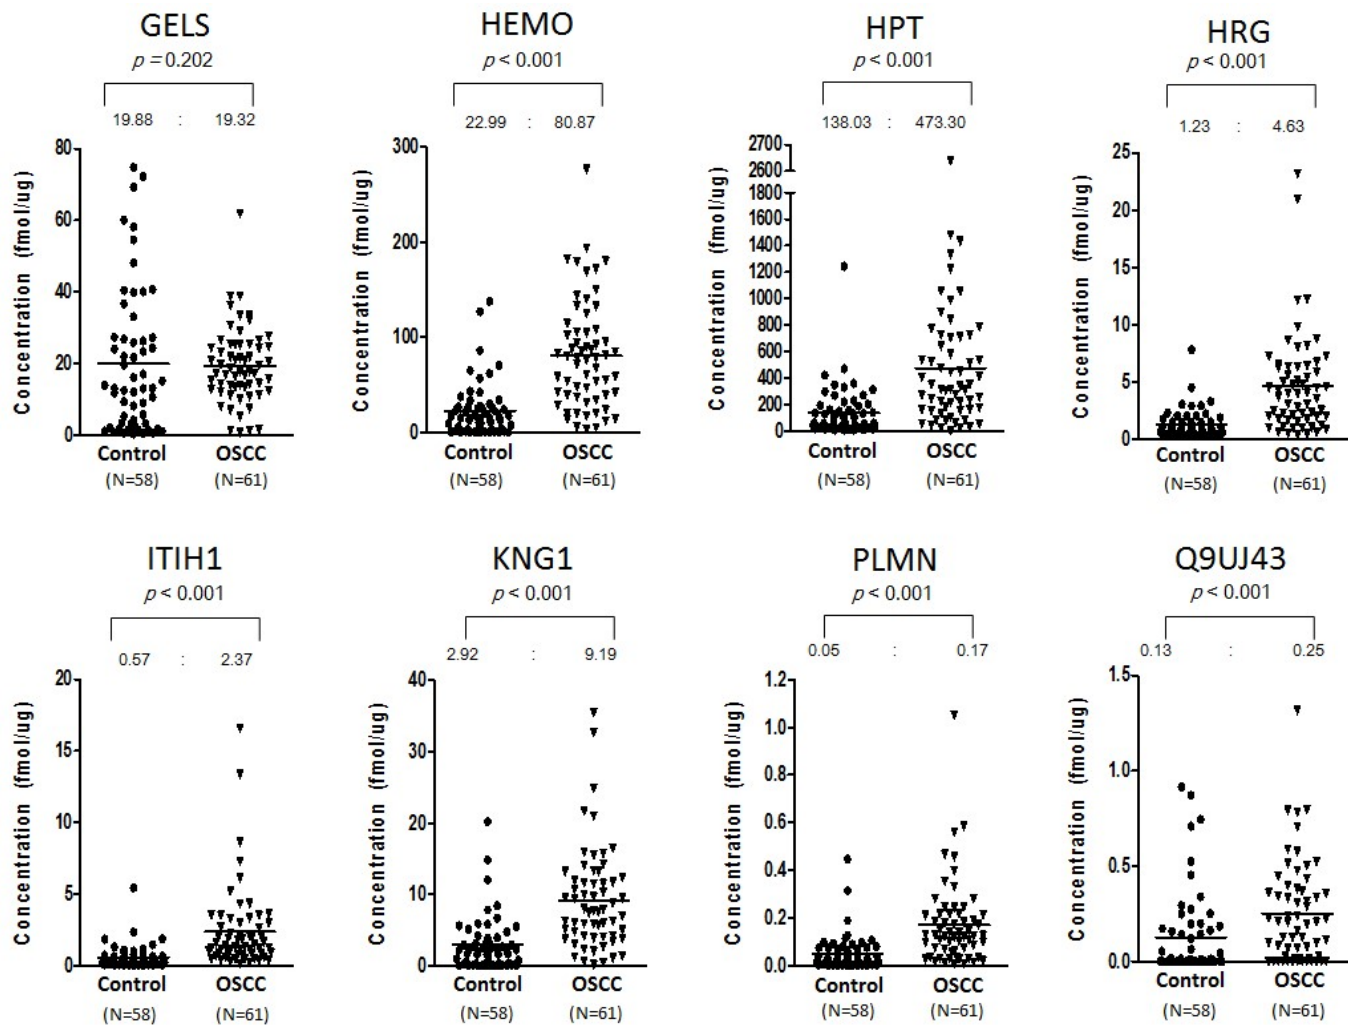



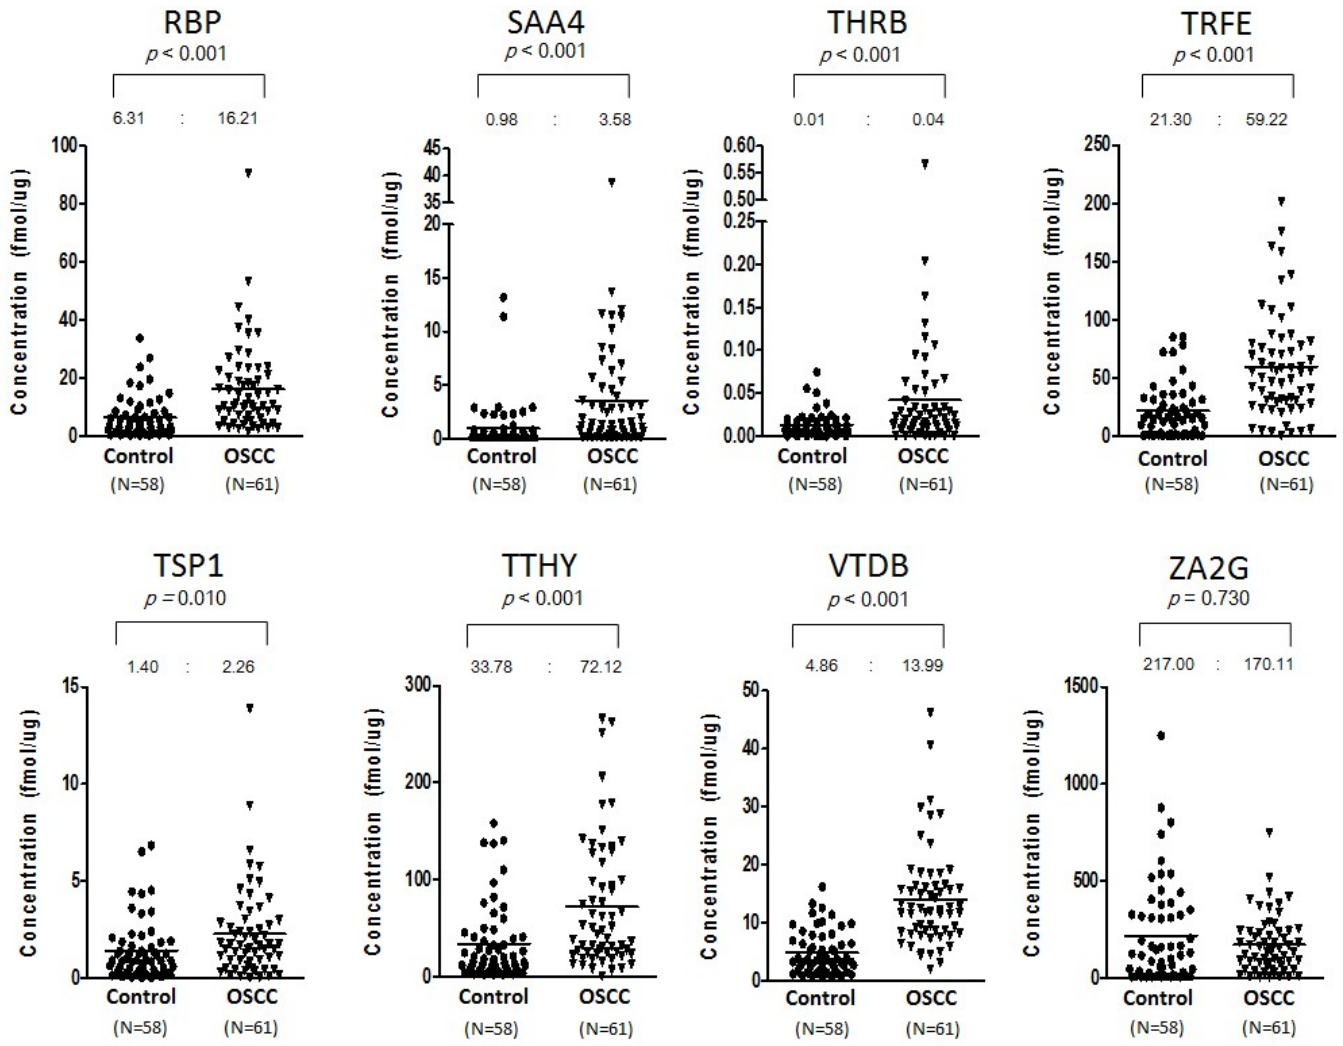

**Supplemental Figure S1D** Concentration distributions of the 56 proteins in the two clinical states (control and oral cancer), expressed as ng/mL.

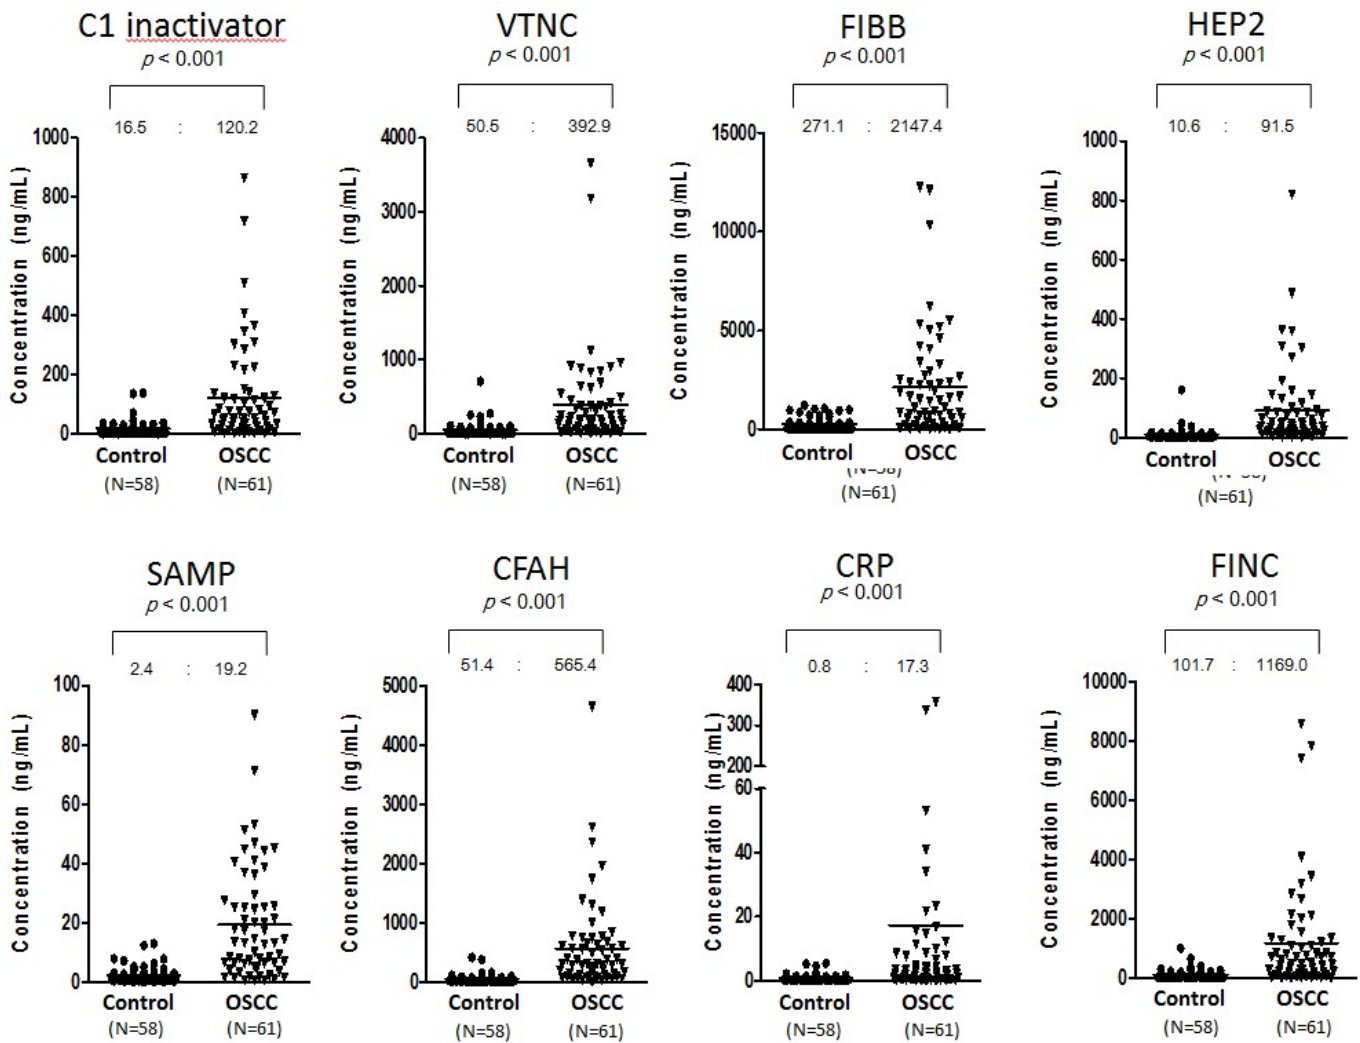

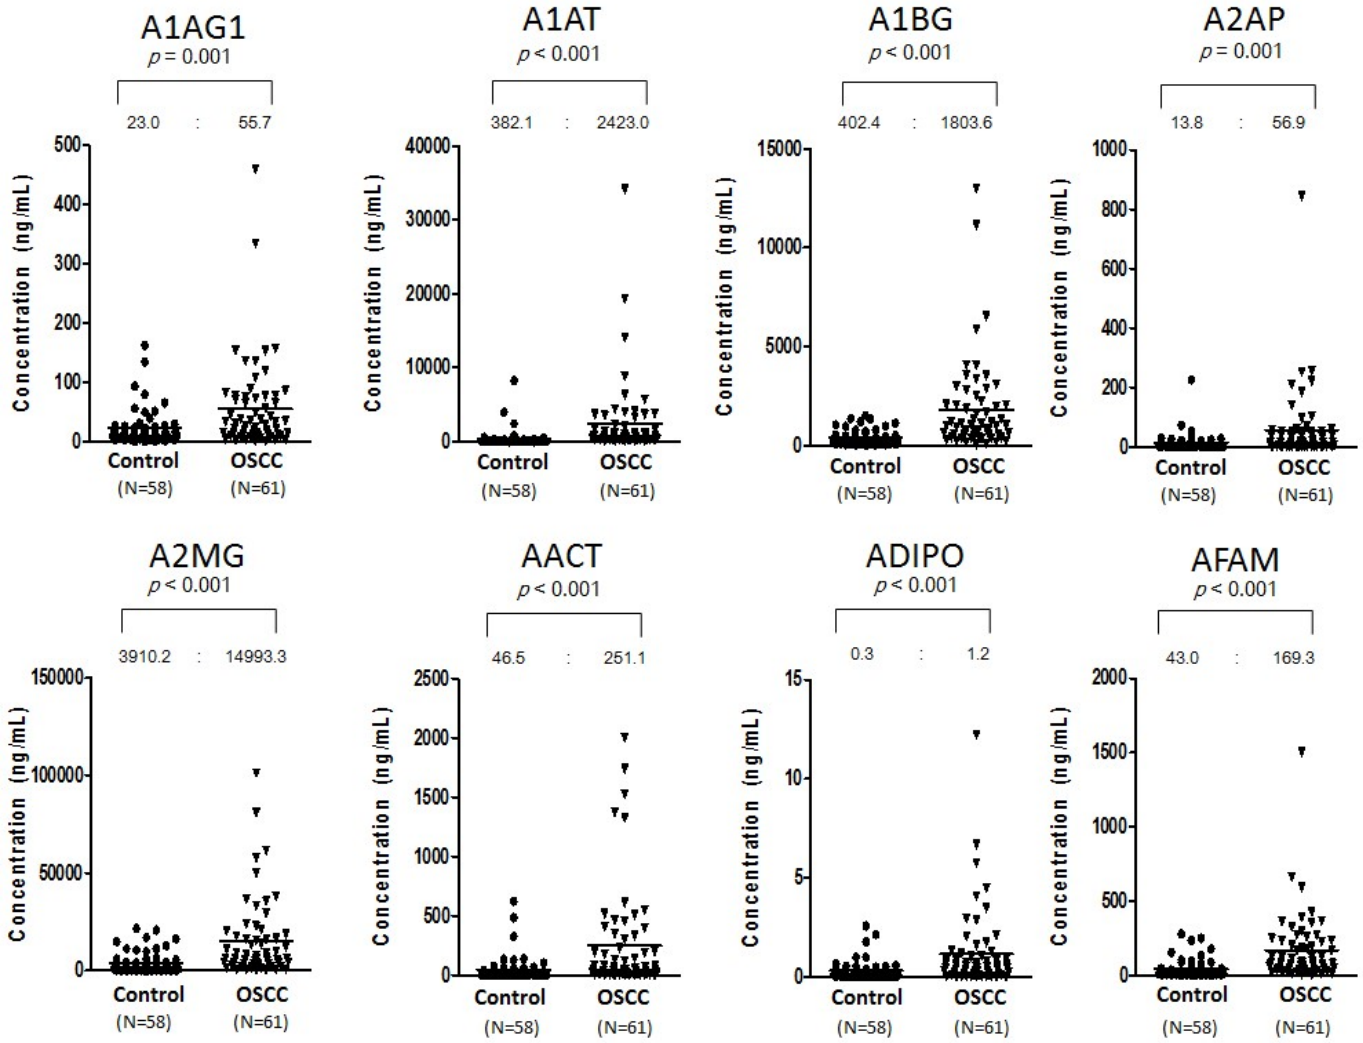

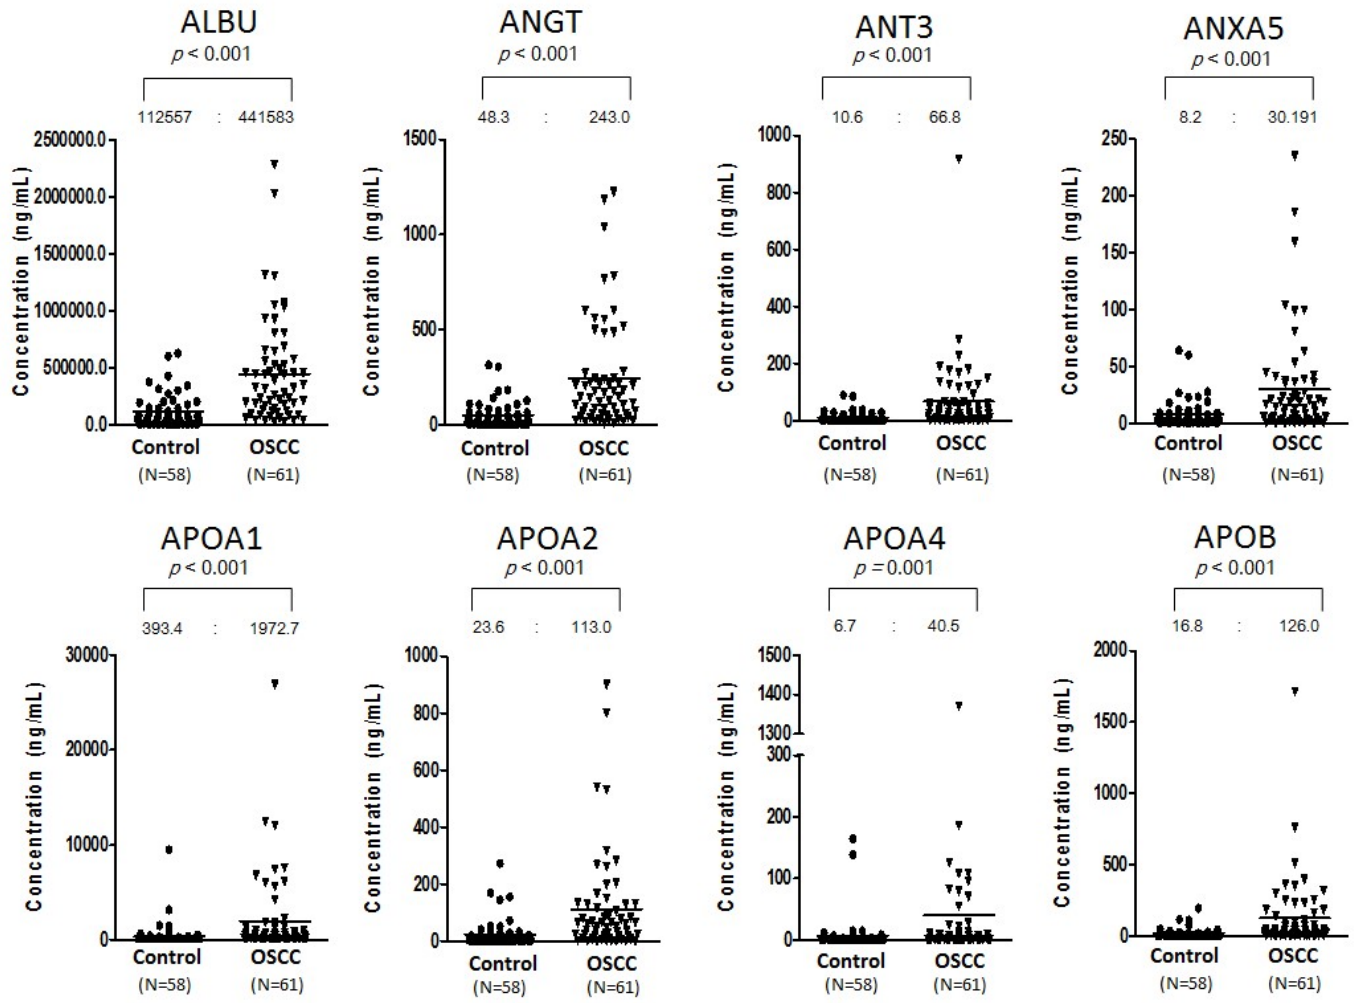

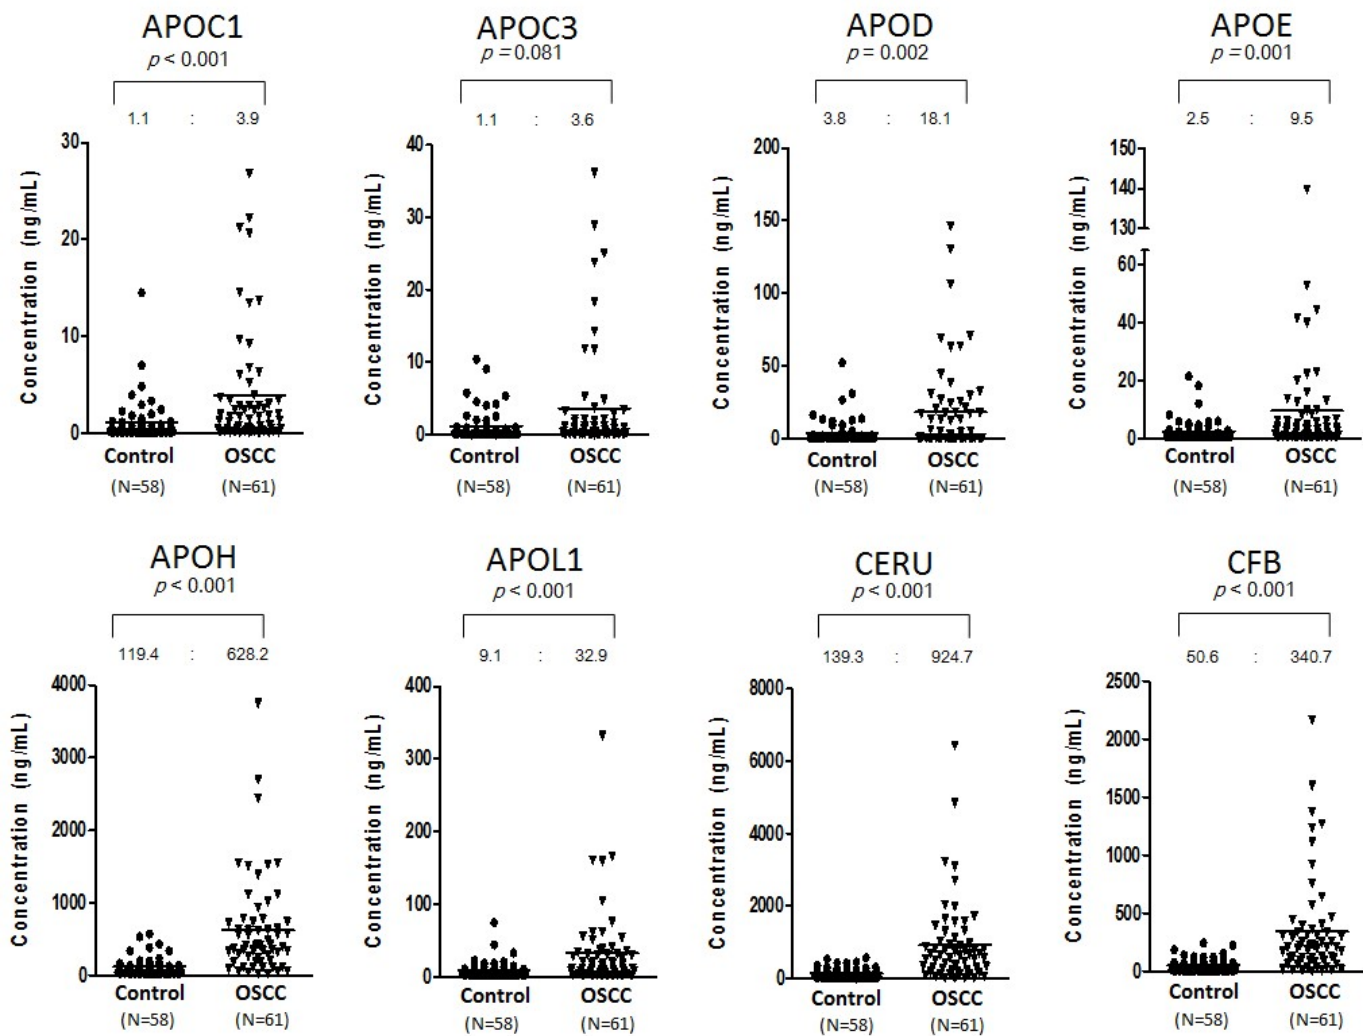

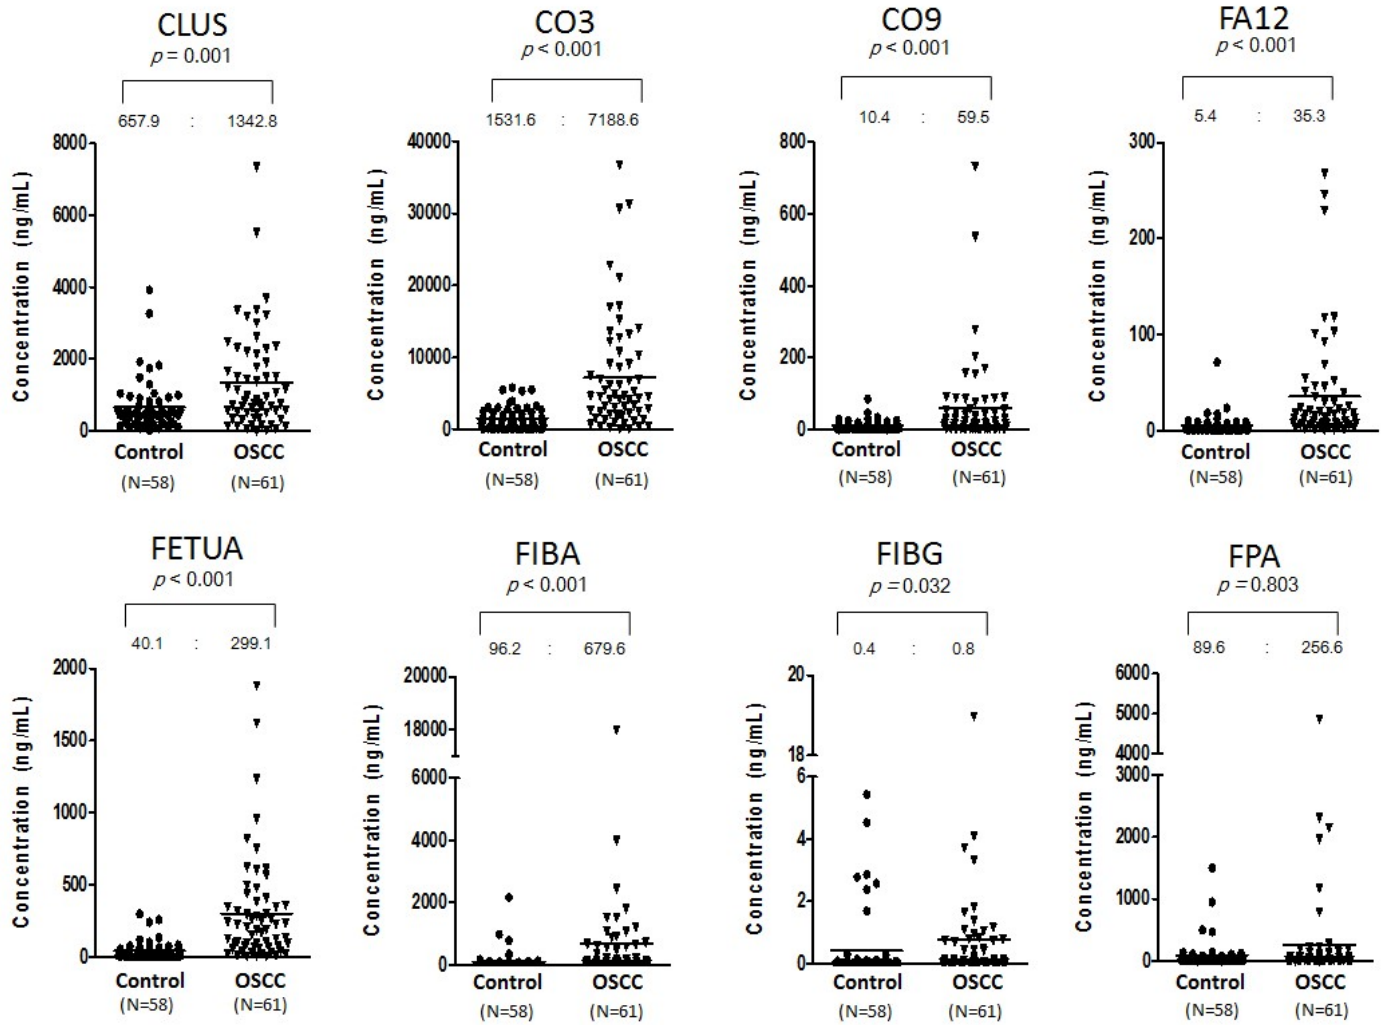

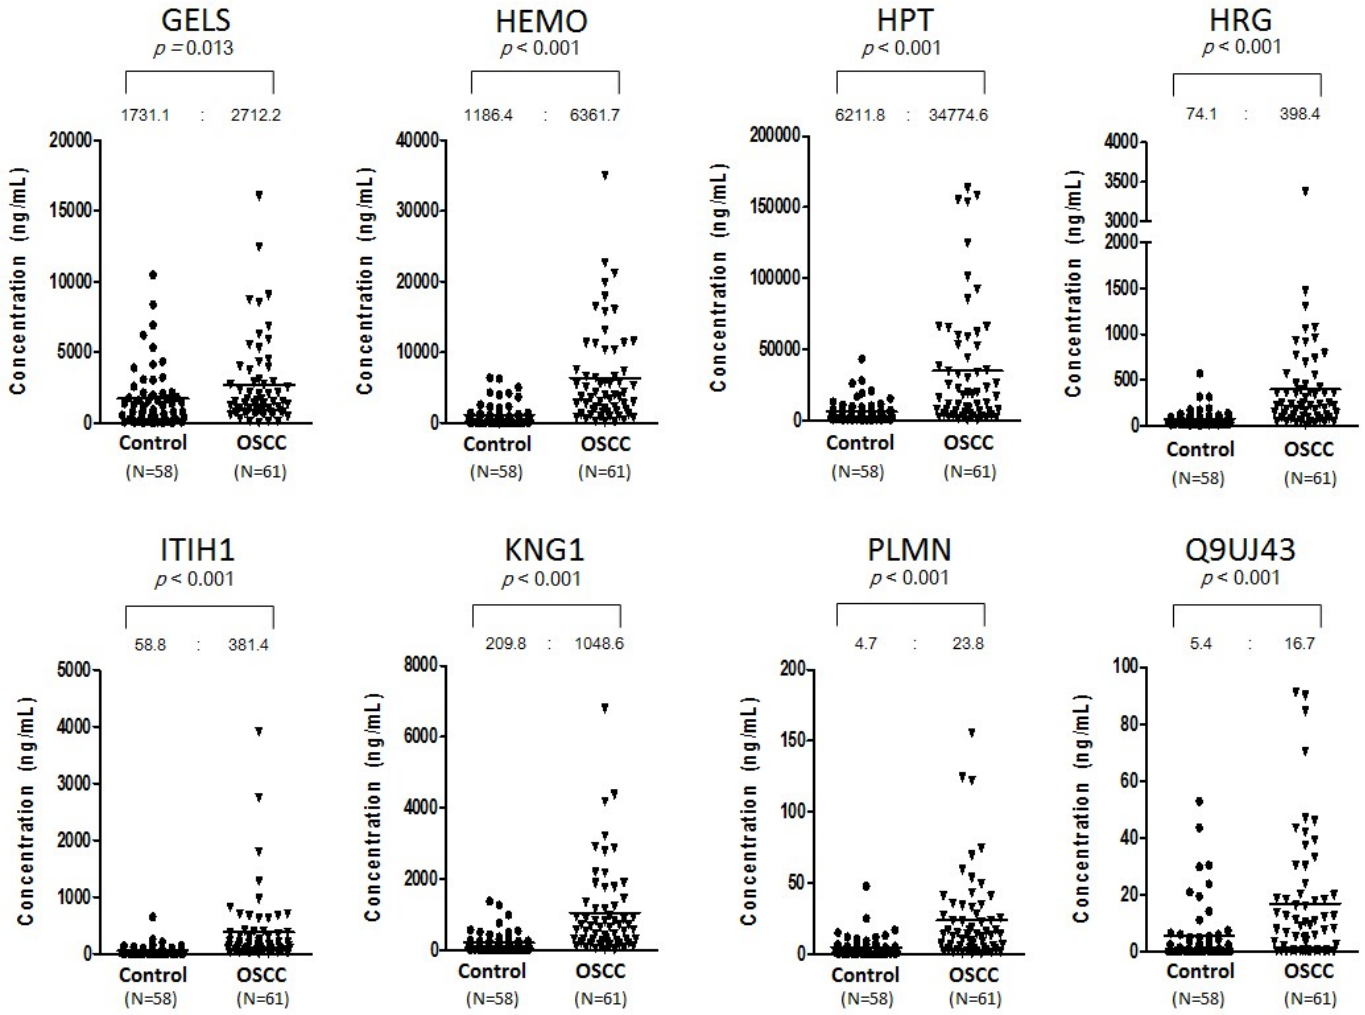

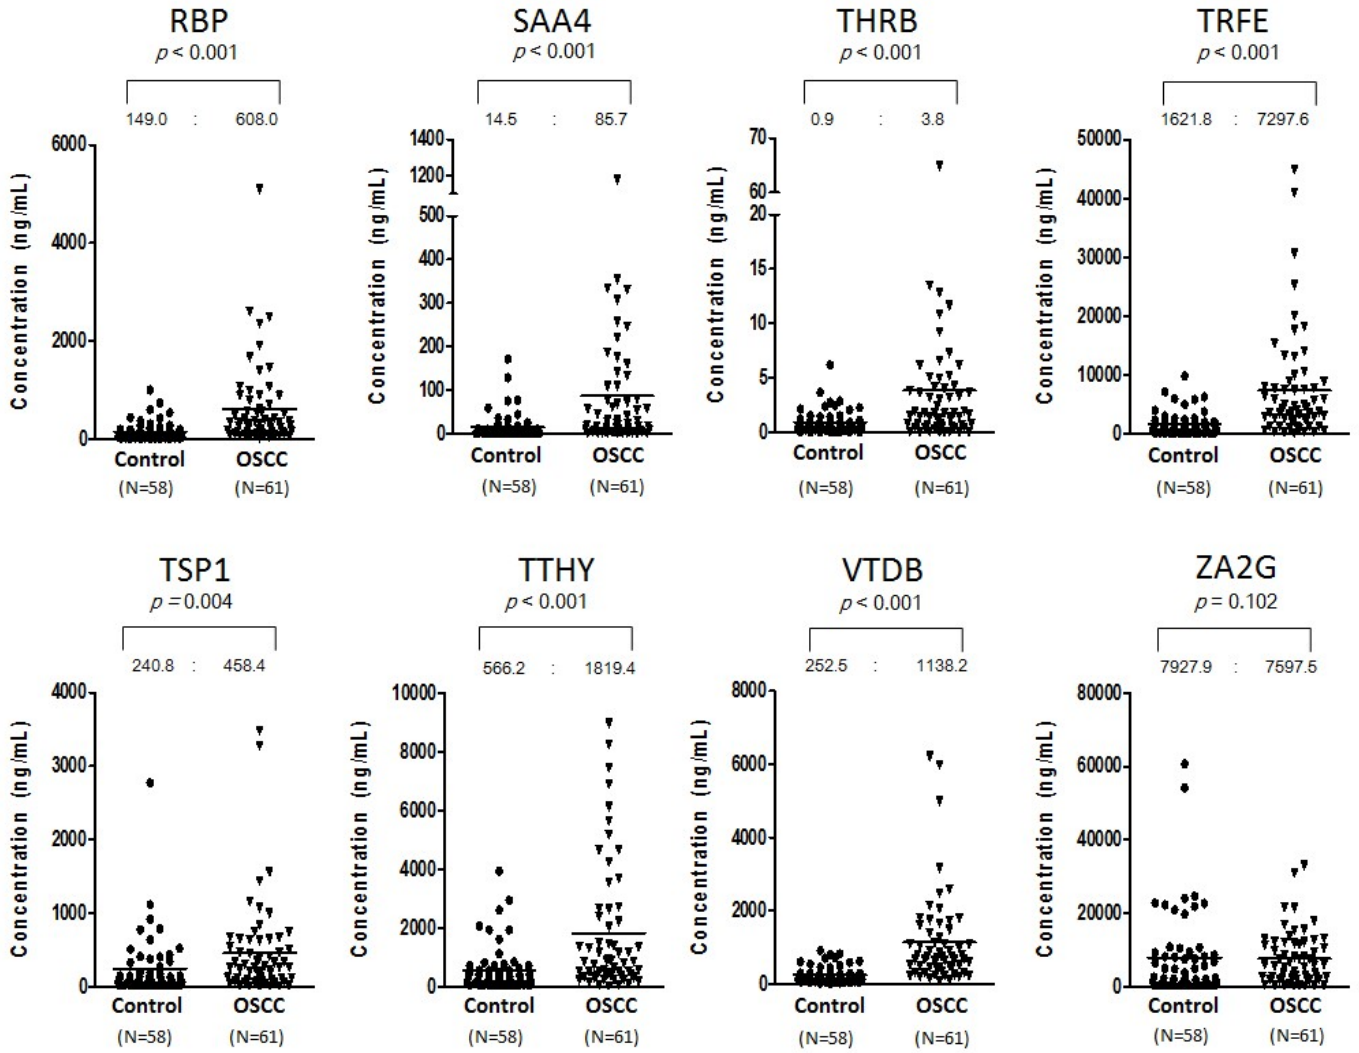



# Supplemental Figure S1E

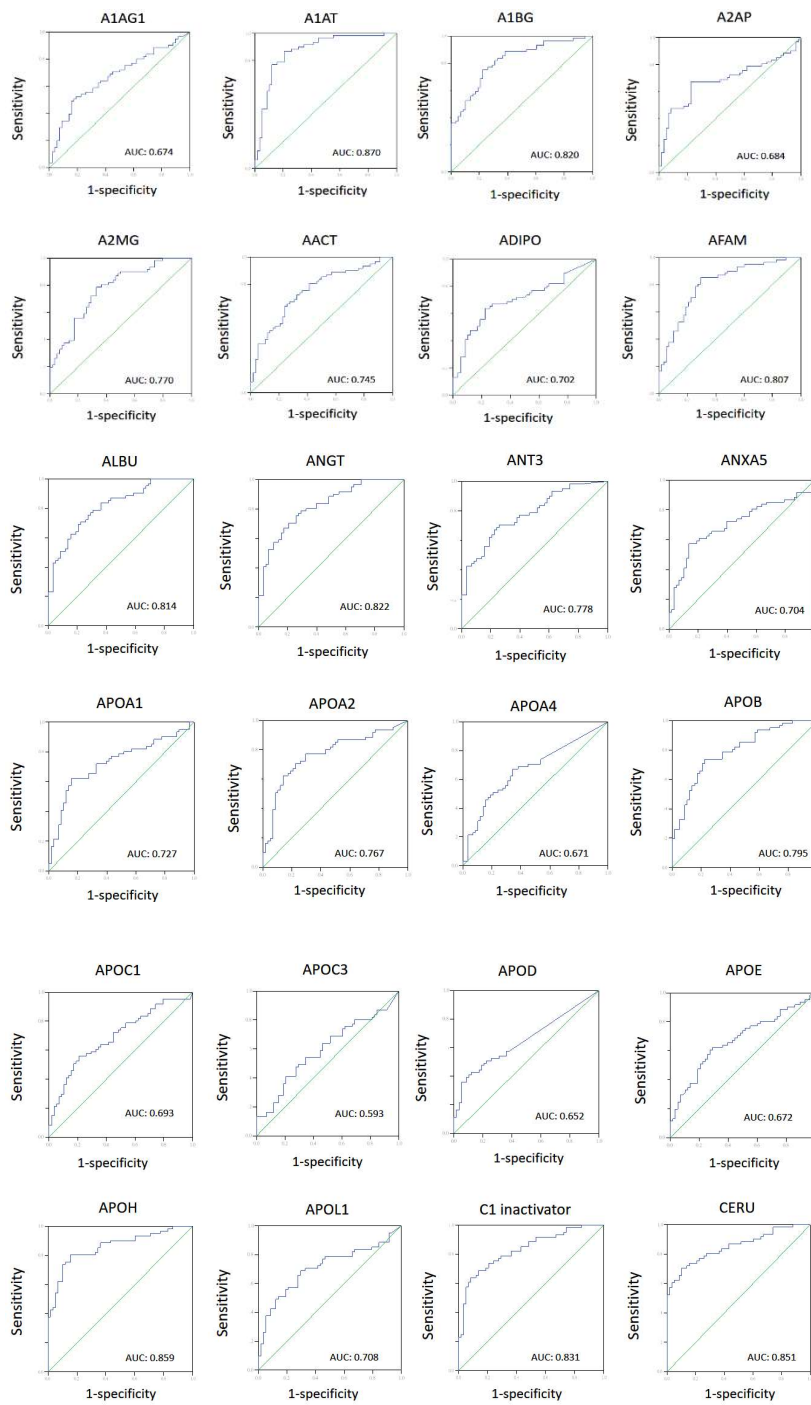

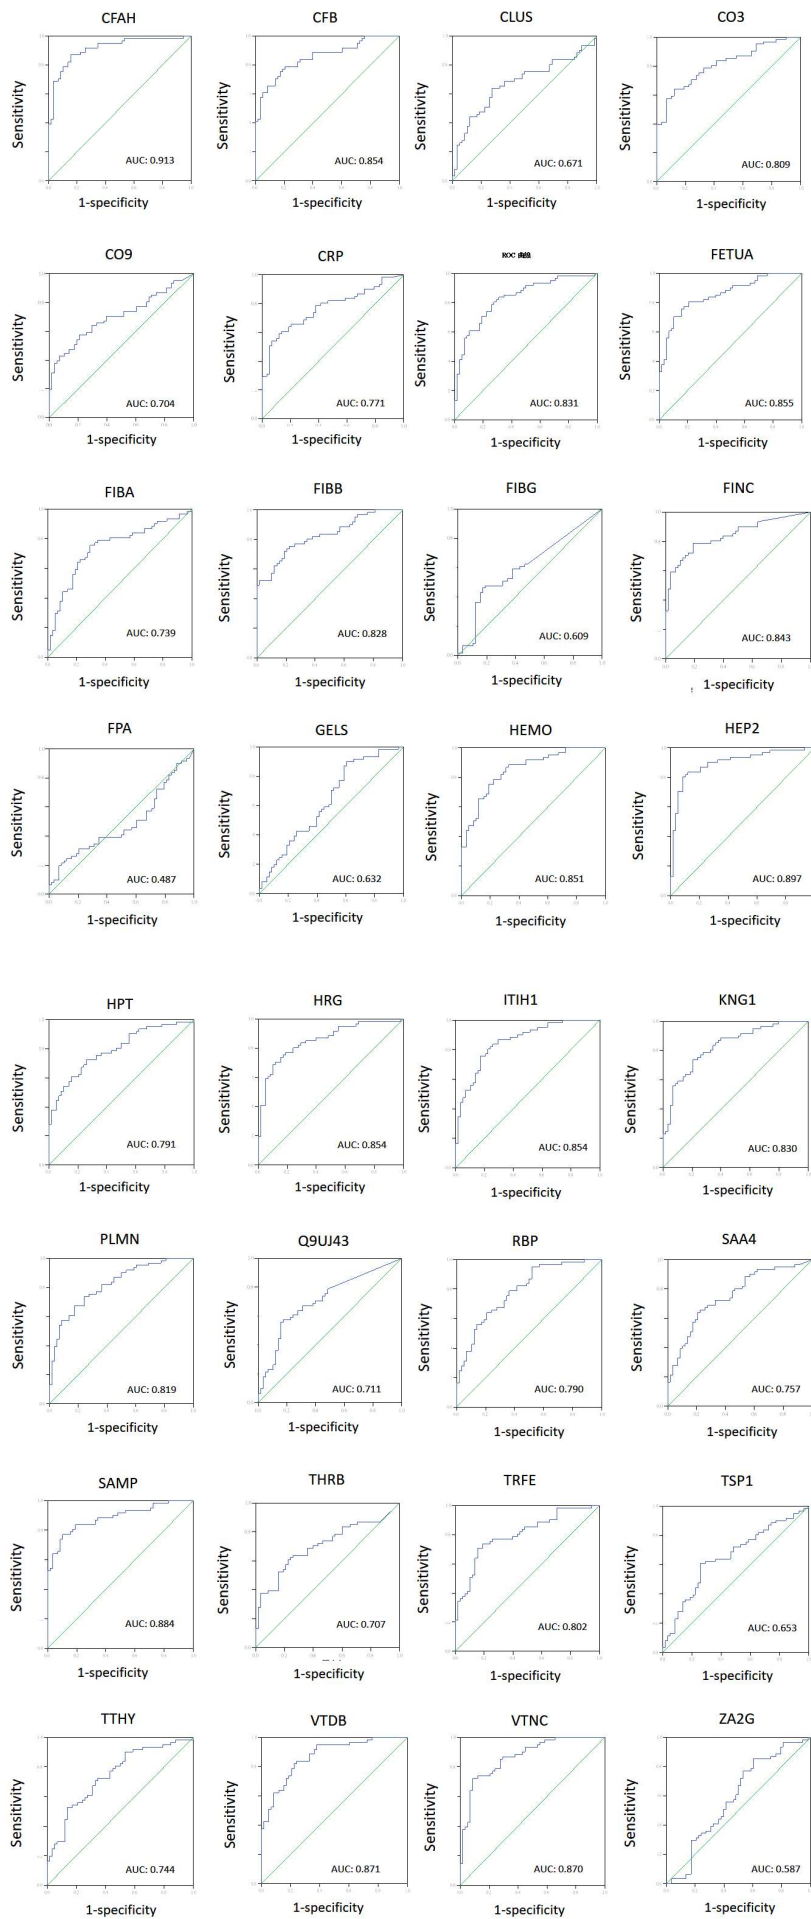

## Supplemental Figure S2

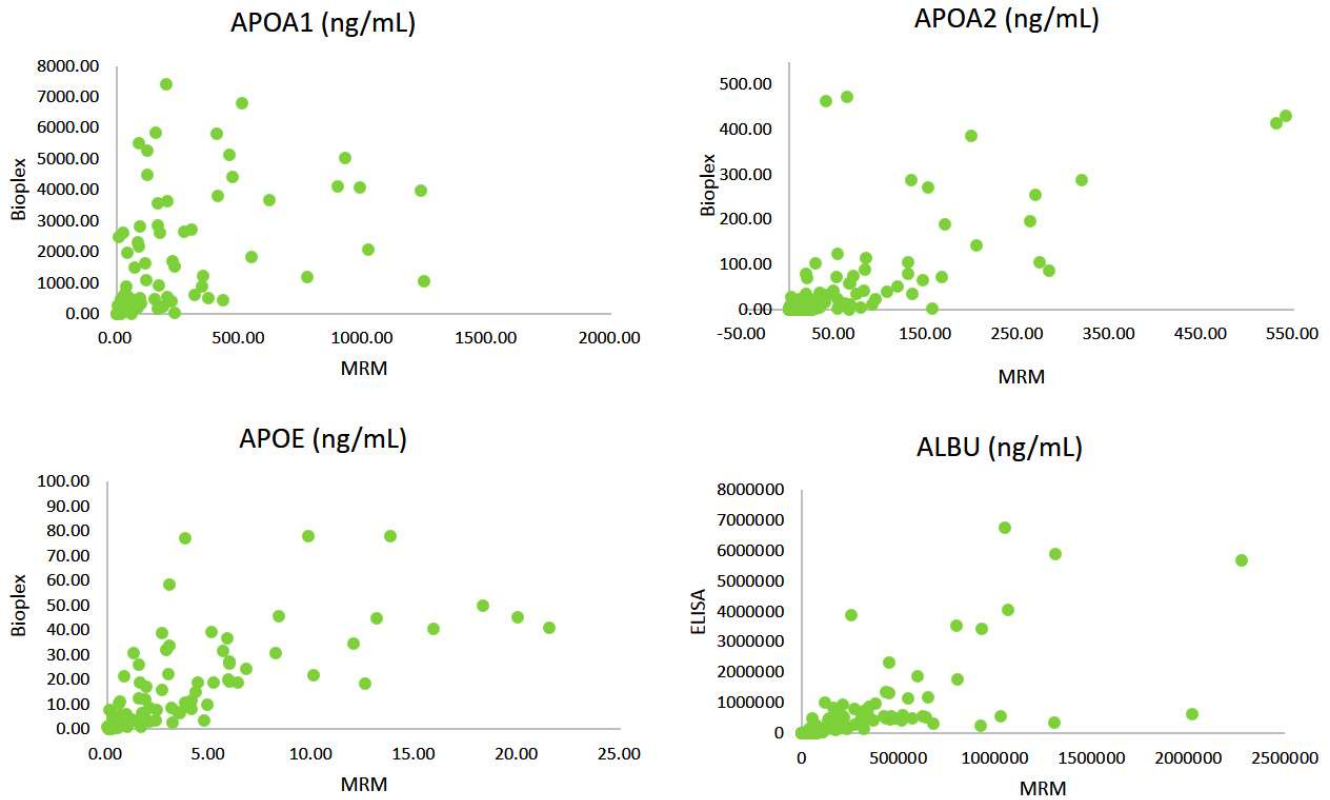

| Protein name   | Assays          | Spearman's correlation |                        |     |
|----------------|-----------------|------------------------|------------------------|-----|
|                |                 | Correlation (r)        | Significance (p-value) | n   |
| <b>APOA1</b>   | MRM vs. BioPlex | 0.792                  | < 0.001                | 117 |
| <b>APOA2</b>   | MRM vs. BioPlex | 0.779                  | < 0.001                | 117 |
| <b>APOE</b>    | MRM vs. BioPlex | 0.854                  | < 0.001                | 117 |
| <b>Albumin</b> | MRM vs. ELISA   | 0.871                  | < 0.001                | 116 |

### Supplemental Figure S3

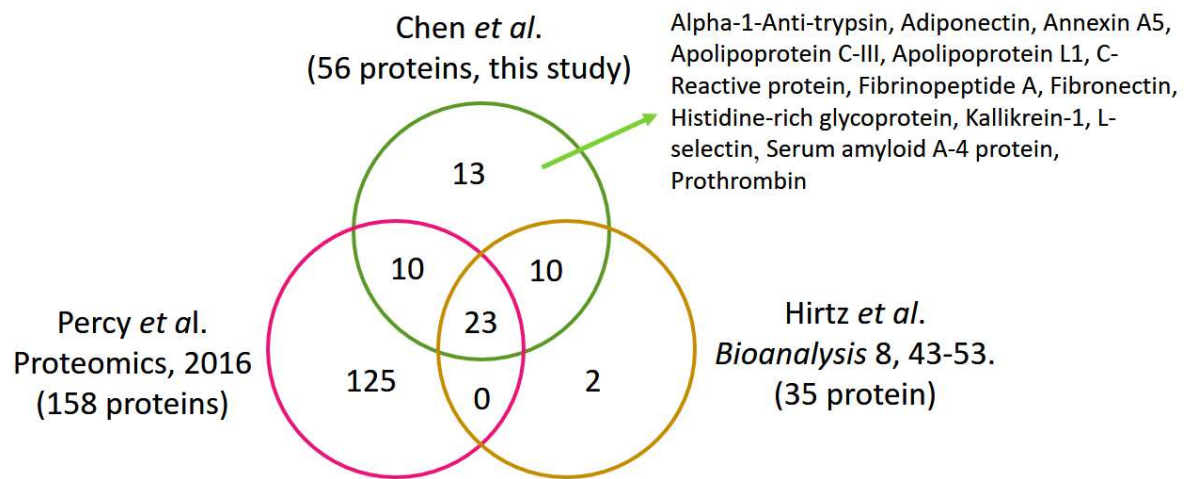

## Supplemental Table S1

Supplemental Table S1A: Demographic characteristics and intake of cigarette and betel nut (n=61) – clinical sample set 1

|                                                        | Total<br>(n=61) | Control<br>(n=29) | OSCC<br>(n=32) | <i>p</i> |
|--------------------------------------------------------|-----------------|-------------------|----------------|----------|
| <b>Sex<sup>1</sup></b>                                 |                 |                   |                | 0.3371   |
| Male                                                   | 60              | 29                | 31             |          |
| Female                                                 | 1               | 0                 | 1              |          |
| <b>Age<sup>2</sup></b>                                 | 49.8±10.5       | 48.3±11.9         | 51.1±9         | 0.2915   |
| <b>Smoke<sup>2</sup></b><br>(packs per day x years)    | 20.5±16.5       | 16.6±10.1         | 24.1±20.1      | 0.0677   |
| <b>Betel nut<sup>2</sup></b><br>(nuts per day x years) | 204±227.9       | 97.9±109.6        | 300.1±263.8    | 0.0003   |

<sup>1</sup>Fisher's exact test.

<sup>2</sup>Analysis of variance (ANOVA).

Supplemental Table S1B: Demographic characteristics and intake of cigarette and betel nut (n=58) – Clinical sample set 2

|                                                        | Total<br>(n=58) | Control<br>(n=29) | OSCC<br>(n=29) | <i>p</i> |
|--------------------------------------------------------|-----------------|-------------------|----------------|----------|
| <b>Sex<sup>1</sup></b>                                 |                 |                   |                | 0.1501   |
| Male                                                   | 56              | 27                | 29             |          |
| Female                                                 | 2               | 2                 | 0              |          |
| <b>Age<sup>2</sup></b>                                 | 50.4±11.1       | 49.2±11.9         | 51.6±10.3      | 0.4024   |
| <b>Smoke<sup>2</sup></b><br>(packs per day x years)    | 21.9±22.4       | 15.6±13           | 28.3±27.8      | 0.0314   |
| <b>Betel nut<sup>2</sup></b><br>(nuts per day x years) | 263.5±390.3     | 69.3±80.1         | 457.6±475      | 0.0002   |

<sup>1</sup>Fisher's exact test.

<sup>2</sup>Analysis of variance (ANOVA).

Supplemental Table S1C: Comparison between clinical sets: Demographic characteristics and intake of cigarette and betel nut

|                                                        | sample set 1<br>(n=61) | sample set 2<br>(n=58) | <i>p</i> |
|--------------------------------------------------------|------------------------|------------------------|----------|
| <b>Group</b>                                           |                        |                        |          |
| Control                                                | 29                     | 29                     |          |
| OSCC                                                   | 32                     | 29                     |          |
| <b>Sex<sup>1</sup></b>                                 |                        |                        | 0.5292   |
| Male                                                   | 60                     | 56                     |          |
| Female                                                 | 1                      | 2                      |          |
| <b>Age<sup>2</sup></b>                                 | 49.8±10.5              | 50.4±11.1              | 0.7496   |
| <b>Smoke<sup>2</sup></b><br>(packs per day x years)    | 20.5±16.5              | 21.9±22.4              | 0.7097   |
| <b>Betel nut<sup>2</sup></b><br>(nuts per day x years) | 204±227.9              | 263.5±390.3            | 0.3156   |

<sup>1</sup>Fisher's exact test.

<sup>2</sup>Analysis of variance (ANOVA).

**Supplemental Table S2.** MRM parameters of the 56 peptides used for quantitation of 56 proteins in saliva.

| Gene Symbol | Protein | Peptide         | Transition | Light  |        | Heavy (SIS) |        | Collision Energy (V) | Retention Time (min) | quantifier peptide | Fixed SIS Peptide Concentration (fmol/ug total protein) |
|-------------|---------|-----------------|------------|--------|--------|-------------|--------|----------------------|----------------------|--------------------|---------------------------------------------------------|
|             |         |                 |            | Q1 m/z | Q3 m/z | Q1 m/z      | Q3 m/z |                      |                      |                    |                                                         |
|             | ADIPO   | IFYNQQNHYDGSTGK | 3/y13(2+)  | 591.27 | 756.33 | 593.94      | 760.34 | 25                   | 14.4                 | *                  | 10                                                      |
|             | ADIPO   | IFYNQQNHYDGSTGK | 3/y14(2+)  | 591.27 | 829.86 | 593.94      | 833.87 | 26                   | 14.4                 |                    | 10                                                      |
|             | ADIPO   | IFYNQQNHYDGSTGK | 3/y5       | 591.27 | 449.24 | 593.94      | 457.25 | 35.5                 | 14.4                 |                    | 10                                                      |
|             | AFAM    | DADPDTFFAK      | 2/y7(2+)   | 563.76 | 413.21 | 567.76      | 417.4  | 25                   | 26.5                 | *                  | 10                                                      |
|             | AFAM    | DADPDTFFAK      | 2/y8(2+)   | 563.76 | 470.72 | 567.76      | 474.9  | 21                   | 26.5                 |                    | 10                                                      |
|             | AFAM    | DADPDTFFAK      | 2/y5       | 563.76 | 613.33 | 567.76      | 621.5  | 30                   | 26.5                 |                    | 10                                                      |
|             | A1AT    | LSITGTYDLK      | 2/y6       | 555.81 | 696.36 | 559.81      | 704.37 | 29                   | 26.8                 | *                  | 20                                                      |
|             | A1AT    | LSITGTYDLK      | 2/y7       | 555.81 | 797.4  | 559.81      | 805.42 | 26                   | 26.8                 |                    | 20                                                      |
|             | A1AT    | LSITGTYDLK      | 2/y8       | 555.81 | 910.49 | 559.81      | 918.5  | 30                   | 26.8                 |                    | 20                                                      |
|             | FETUA   | HTLNQIDEVK      | 2/y8       | 598.82 | 958.52 | 602.82      | 966.53 | 31                   | 13.9                 |                    | 5                                                       |
|             | FETUA   | HTLNQIDEVK      | 3/y4       | 399.55 | 490.25 | 402.22      | 498.26 | 15                   | 13.9                 | *                  | 5                                                       |
|             | FETUA   | HTLNQIDEVK      | 3/b6(2+)   | 399.55 | 354.2  | 402.22      | 354.2  | 12                   | 13.9                 |                    | 5                                                       |
|             | ANGT    | ALQDQLVLVAAK    | 2/y10(2+)  | 634.88 | 542.82 | 638.89      | 546.83 | 26.8                 | 30.5                 | *                  | 5                                                       |

|  |       |                 |           |        |        |        |        |      |      |   |    |
|--|-------|-----------------|-----------|--------|--------|--------|--------|------|------|---|----|
|  | ANGT  | ALQDQLVLVAAK    | 2/y9      | 634.88 | 956.58 | 638.89 | 964.59 | 27.6 | 30.5 |   | 5  |
|  | ANGT  | ALQDQLVLVAAK    | 2/y5      | 634.88 | 501.34 | 638.89 | 509.35 | 34   | 30.5 |   | 5  |
|  | ANXA5 | GTVTDFPGFDER    | 2/y6      | 670.81 | 720.33 | 675.81 | 730.34 | 35.8 | 29   | * | 5  |
|  | ANXA5 | GTVTDFPGFDER    | 2/y7      | 670.81 | 867.4  | 675.81 | 877.41 | 33.5 | 29   |   | 5  |
|  | ANXA5 | GTVTDFPGFDER    | 2/b6      | 670.81 | 621.2  | 675.81 | 621.2  | 23   | 29   |   | 5  |
|  | APOA1 | ATEHLSTLSEK     | 2/y6      | 608.31 | 664.35 | 612.32 | 672.37 | 34   | 10.7 |   | 50 |
|  | APOA1 | ATEHLSTLSEK     | 3/y9(2+)  | 405.88 | 522.27 | 408.55 | 526.28 | 18   | 10.7 | * | 50 |
|  | APOA1 | ATEHLSTLSEK     | 3/y5      | 405.88 | 577.32 | 408.55 | 585.33 | 17   | 10.7 |   | 50 |
|  | APOA2 | SPELQAEAK       | 2/y8(2+)  | 486.75 | 443.24 | 490.76 | 447.24 | 26.7 | 9.4  | * | 10 |
|  | APOA2 | SPELQAEAK       | 2/y5      | 486.75 | 546.29 | 490.76 | 554.3  | 27   | 9.4  |   | 10 |
|  | APOA2 | SPELQAEAK       | 2/b7      | 486.75 | 755.36 | 490.76 | 755.36 | 21.8 | 9.4  |   | 10 |
|  | APOA4 | SLAPYAQDTQEK    | 2/y9(2+)  | 675.83 | 540.25 | 679.84 | 544.4  | 28.2 | 14.5 | * | 2  |
|  | APOA4 | SLAPYAQDTQEK    | 2/y7      | 675.83 | 819.38 | 679.84 | 827.4  | 40   | 14.5 |   | 2  |
|  | APOA4 | SLAPYAQDTQEK    | 2/y10(2+) | 675.83 | 575.77 | 679.84 | 579.8  | 29   | 14.5 |   | 2  |
|  | APOL1 | VTEPISAESGEQVER | 2/y12(2+) | 815.9  | 651.32 | 820.9  | 656.5  | 39   | 17.7 | * | 10 |
|  | APOL1 | VTEPISAESGEQVER | 3/y6      | 544.27 | 717.35 | 547.6  | 727.36 | 27   | 17.7 |   | 10 |



|  |       |                 |           |        |        |        |        |      |      |   |    |
|--|-------|-----------------|-----------|--------|--------|--------|--------|------|------|---|----|
|  | APOL1 | VTEPISAESGEQVER | 3/y7      | 544.27 | 804.38 | 547.6  | 814.39 | 26   | 17.7 |   | 10 |
|  | APOH  | ATVVYQGER       | 2/y5      | 511.77 | 652.3  | 516.77 | 662.31 | 27.7 | 10.5 |   | 5  |
|  | APOH  | ATVVYQGER       | 2/y6      | 511.77 | 751.37 | 516.77 | 761.38 | 26.4 | 10.5 | * | 5  |
|  | APOH  | ATVVYQGER       | 2/y7      | 511.77 | 850.44 | 516.77 | 860.45 | 25.3 | 10.5 |   | 5  |
|  | CO9   | TEHYEEQIEAFK    | 3/b7(2+)  | 508.57 | 459.19 | 511.24 | 459.19 | 21   | 22.2 |   | 20 |
|  | CO9   | TEHYEEQIEAFK    | 3/b5      | 508.57 | 660.26 | 511.24 | 660.26 | 26   | 22.2 | * | 20 |
|  | CO9   | TEHYEEQIEAFK    | 3/b6      | 508.57 | 789.3  | 511.24 | 789.3  | 25   | 22.2 |   | 20 |
|  | FIBB  | QGFGNVATNTDGK   | 2/y7      | 654.81 | 706.34 | 658.82 | 714.35 | 34   | 14   | * | 50 |
|  | FIBB  | QGFGNVATNTDGK   | 2/y8      | 654.81 | 805.41 | 658.82 | 813.42 | 34   | 14   |   | 50 |
|  | FIBB  | QGFGNVATNTDGK   | 2/y5      | 654.81 | 534.25 | 658.82 | 542.3  | 37   | 14   |   | 50 |
|  | ITIH1 | AAISGENAGLVR    | 2/y9      | 579.32 | 902.47 | 584.32 | 912.48 | 35   | 16.9 | * | 2  |
|  | ITIH1 | AAISGENAGLVR    | 2/y8      | 579.32 | 815.44 | 584.32 | 825.45 | 33   | 16.9 |   | 2  |
|  | ITIH1 | AAISGENAGLVR    | 2/y10(2+) | 579.32 | 508.28 | 584.32 | 513.28 | 25   | 16.9 |   | 2  |
|  | PLMN  | LFLEPTR         | 2/y5      | 438.25 | 615.35 | 443.26 | 625.35 | 20   | 23.5 | * | 2  |
|  | PLMN  | LFLEPTR         | 2/y3      | 438.25 | 373.22 | 443.26 | 383.23 | 30   | 23.5 |   | 2  |
|  | PLMN  | LFLEPTR         | 2/y4      | 438.25 | 502.26 | 443.26 | 512.27 | 24   | 23.5 |   | 2  |

|  |       |                 |           |        |         |        |         |      |      |   |     |
|--|-------|-----------------|-----------|--------|---------|--------|---------|------|------|---|-----|
|  | THRB  | ETAASLLQAGYK    | 2/y6      | 626.33 | 679.38  | 630.34 | 687.39  | 28   | 25   |   | 5   |
|  | THRB  | ETAASLLQAGYK    | 2/y8      | 626.33 | 879.49  | 630.34 | 887.51  | 29   | 25   | * | 5   |
|  | THRB  | ETAASLLQAGYK    | 2/y5      | 626.33 | 566.29  | 630.34 | 574.31  | 27   | 25   |   | 5   |
|  | SAA4  | GPGGVWAAK       | 2/y8(2+)  | 421.73 | 393.22  | 425.74 | 397.23  | 24   | 14.2 | * | 5   |
|  | SAA4  | GPGGVWAAK       | 2/b8      | 421.73 | 696.37  | 425.74 | 696.37  | 23   | 14.2 |   | 5   |
|  | SAA4  | GPGGVWAAK       | 2/y4      | 421.73 | 475.27  | 425.74 | 483.28  | 23.5 | 14.2 |   | 5   |
|  | TSP1  | FVFGTTPEDILR    | 2/y10(2+) | 697.87 | 574.8   | 702.87 | 579.81  | 28   | 39.9 |   | 5   |
|  | TSP1  | FVFGTTPEDILR    | 2/y6      | 697.87 | 742.41  | 702.87 | 752.42  | 34   | 39.9 | * | 5   |
|  | TSP1  | FVFGTTPEDILR    | 2/y9      | 697.87 | 1001.53 | 702.87 | 1011.53 | 36   | 39.9 |   | 5   |
|  | TRFE  | EGYYGYTGAFR     | 2/y7      | 642.29 | 771.38  | 647.29 | 781.39  | 32.5 | 24.8 | * | 100 |
|  | TRFE  | EGYYGYTGAFR     | 2/y5      | 642.29 | 551.29  | 647.29 | 561.3   | 31   | 24.8 |   | 100 |
|  | TRFE  | EGYYGYTGAFR     | 2/y8      | 642.29 | 934.44  | 647.29 | 944.45  | 34   | 24.8 |   | 100 |
|  | A1AG1 | NWGLSVYADKPETTK | 3/y13(2+) | 570.29 | 704.87  | 572.96 | 708.88  | 25   | 25.9 | * | 20  |
|  | A1AG1 | NWGLSVYADKPETTK | 3/b10(2+) | 570.29 | 567.78  | 572.96 | 567.78  | 22   | 25.9 |   | 20  |
|  | A1AG1 | NWGLSVYADKPETTK | 3/y9      | 570.29 | 1052.53 | 572.96 | 1060.54 | 31   | 25.9 |   | 20  |
|  | A2MG  | TEHPFTVEEFVLPK  | 3/y5      | 558.29 | 603.39  | 560.3  | 609.41  | 22.5 | 36   |   | 20  |

|  |      |                |          |        |        |        |        |      |      |   |    |
|--|------|----------------|----------|--------|--------|--------|--------|------|------|---|----|
|  | A2MG | TEHPFTVEEFVLPK | 3/y6     | 558.29 | 732.43 | 560.3  | 738.45 | 23   | 36   | * | 20 |
|  | A2MG | TEHPFTVEEFVLPK | 3/b6     | 558.29 | 713.33 | 560.3  | 713.33 | 24   | 36   |   | 20 |
|  | ANT3 | DDLYVSDAFHK    | 2/y9(2+) | 437.21 | 540.28 | 439.88 | 544.29 | 17.7 | 23.5 |   | 10 |
|  | ANT3 | DDLYVSDAFHK    | 2/y8(2+) | 437.21 | 483.74 | 439.88 | 487.74 | 17.6 | 23.5 |   | 10 |
|  | ANT3 | DDLYVSDAFHK    | 2/y6     | 437.21 | 704.34 | 439.88 | 712.35 | 23   | 23.5 | * | 10 |
|  | APOB | FPEVDVLTk      | 2/y8(2+) | 524.29 | 450.76 | 528.3  | 454.76 | 27.4 | 30   | * | 2  |
|  | APOB | FPEVDVLTk      | 2/y6     | 524.29 | 674.41 | 528.3  | 682.42 | 32   | 30   |   | 2  |
|  | APOB | FPEVDVLTk      | 2/y7     | 524.29 | 803.45 | 528.3  | 811.47 | 28.9 | 30   |   | 2  |
|  | CERU | EYTDASFTNR     | 2/y5     | 602.27 | 624.31 | 607.27 | 634.32 | 29   | 15.6 |   | 5  |
|  | CERU | EYTDASFTNR     | 2/y4     | 602.27 | 537.28 | 607.27 | 547.29 | 29   | 15.6 | * | 5  |
|  | CERU | EYTDASFTNR     | 2/y8     | 602.27 | 911.42 | 607.27 | 921.43 | 37   | 15.6 |   | 5  |
|  | FIBA | GSESGIFTNTK    | 2/y5     | 570.78 | 610.32 | 574.79 | 618.33 | 28.7 | 15.8 | * | 5  |
|  | FIBA | GSESGIFTNTK    | 2/y7     | 570.78 | 780.43 | 574.79 | 788.44 | 28   | 15.8 |   | 5  |
|  | FIBA | GSESGIFTNTK    | 2/y8     | 570.78 | 867.46 | 574.79 | 875.47 | 27   | 15.8 |   | 5  |
|  | FIBG | DTVQIHDITGK    | 3/y9(2+) | 409.55 | 505.79 | 412.22 | 509.79 | 17.8 | 17.8 | * | 2  |
|  | FIBG | DTVQIHDITGK    | 3/y8(2+) | 409.55 | 456.25 | 412.22 | 460.26 | 16.5 | 17.8 |   | 2  |

|  |      |               |      |        |        |        |        |      |      |   |      |
|--|------|---------------|------|--------|--------|--------|--------|------|------|---|------|
|  | FIBG | DTVQIHDTGK    | 3/y6 | 409.55 | 670.35 | 412.22 | 678.37 | 22   | 17.8 |   | 2    |
|  | HEP2 | TLEAQLTPR     | 2/y7 | 514.79 | 814.44 | 519.79 | 824.45 | 27   | 19.3 | * | 2    |
|  | HEP2 | TLEAQLTPR     | 2/y6 | 514.79 | 685.4  | 519.79 | 695.41 | 27   | 19.3 |   | 2    |
|  | HEP2 | TLEAQLTPR     | 2/y4 | 514.79 | 486.3  | 519.79 | 496.31 | 28   | 19.3 |   | 2    |
|  | TTHY | AADDTWEPFASGK | 2/y6 | 697.81 | 606.32 | 701.82 | 614.34 | 38   | 27.9 |   | 20   |
|  | TTHY | AADDTWEPFASGK | 2/y7 | 697.81 | 735.37 | 701.82 | 743.38 | 32   | 27.9 |   | 20   |
|  | TTHY | AADDTWEPFASGK | 2/y8 | 697.81 | 921.45 | 701.82 | 929.46 | 36   | 27.9 | * | 20   |
|  | VTDB | THLPEVFLSK    | 2/b3 | 585.83 | 352.2  | 588.84 | 352.2  | 28   | 26.8 |   | 20   |
|  | VTDB | THLPEVFLSK    | 2/y7 | 585.83 | 819.46 | 588.84 | 825.48 | 32   | 26.8 |   | 20   |
|  | VTDB | THLPEVFLSK    | 2/y8 | 585.83 | 932.55 | 588.84 | 938.57 | 30   | 26.8 | * | 20   |
|  | ALBU | LVNEVTEFAK    | 2/y8 | 575.31 | 937.46 | 578.32 | 943.48 | 29   | 24.2 |   | 1000 |
|  | ALBU | LVNEVTEFAK    | 2/y6 | 575.31 | 694.38 | 578.32 | 700.4  | 28   | 24.2 |   | 1000 |
|  | ALBU | LVNEVTEFAK    | 2/y5 | 575.31 | 595.31 | 578.32 | 601.33 | 29   | 24.2 | * | 1000 |
|  | AACT | EIGELYLPK     | 2/y7 | 531.3  | 819.46 | 535.3  | 827.48 | 25.8 | 29   |   | 2    |
|  | AACT | EIGELYLPK     | 2/y5 | 531.3  | 633.4  | 535.3  | 641.41 | 21   | 29   | * | 2    |
|  | AACT | EIGELYLPK     | 2/y3 | 531.3  | 357.25 | 535.3  | 365.26 | 21   | 29   |   | 2    |

|  |       |             |          |        |        |        |        |      |      |   |    |
|--|-------|-------------|----------|--------|--------|--------|--------|------|------|---|----|
|  | A1BG  | LETPDFQLFK  | 2/y7     | 619.33 | 894.47 | 623.33 | 902.49 | 28.6 | 38.1 | * | 10 |
|  | A1BG  | LETPDFQLFK  | 2/y8(2+) | 619.33 | 498.26 | 623.33 | 502.3  | 26   | 38.1 |   | 10 |
|  | A1BG  | LETPDFQLFK  | 2/b3     | 619.33 | 344.18 | 623.33 | 344.18 | 25   | 38.1 |   | 10 |
|  | APOC1 | TPDVSSALDK  | 2/y9(2+) | 516.76 | 466.24 | 520.77 | 470.25 | 29   | 16.5 |   | 5  |
|  | APOC1 | TPDVSSALDK  | 2/y6     | 516.76 | 620.32 | 520.77 | 628.34 | 29   | 16.5 | * | 5  |
|  | APOC1 | TPDVSSALDK  | 2/y8     | 516.76 | 834.42 | 520.77 | 842.43 | 26   | 16.5 |   | 5  |
|  | APOC3 | GWVTDGFSSLK | 2/y8     | 598.8  | 854.43 | 602.81 | 862.44 | 25   | 32.9 | * | 5  |
|  | APOC3 | GWVTDGFSSLK | 2/y9     | 598.8  | 953.49 | 602.81 | 961.51 | 25   | 32.9 |   | 5  |
|  | APOC3 | GWVTDGFSSLK | 2/b3     | 598.8  | 343.18 | 602.81 | 343.18 | 22   | 32.9 |   | 5  |
|  | APOD  | IPTTFENGR   | 2/y8(2+) | 517.77 | 461.22 | 522.77 | 466.23 | 25   | 16   | * | 2  |
|  | APOD  | IPTTFENGR   | 2/y6     | 517.77 | 723.34 | 522.77 | 733.35 | 31   | 16   |   | 2  |
|  | APOD  | IPTTFENGR   | 2/y7     | 517.77 | 824.39 | 522.77 | 834.4  | 30   | 16   |   | 2  |
|  | APOE  | LGPLVEQGR   | 2/y7(2+) | 484.78 | 399.73 | 489.78 | 404.73 | 24   | 17   | * | 1  |
|  | APOE  | LGPLVEQGR   | 2/y4     | 484.78 | 489.24 | 489.78 | 499.25 | 30   | 17   |   | 1  |
|  | APOE  | LGPLVEQGR   | 2/y5     | 484.78 | 588.31 | 489.78 | 598.32 | 30   | 17   |   | 1  |
|  | CLUS  | ELDESLQVAER | 2/y5     | 644.82 | 602.33 | 649.83 | 612.33 | 29   | 21.4 |   | 10 |

|  |                   |               |      |        |        |        |        |    |      |   |    |
|--|-------------------|---------------|------|--------|--------|--------|--------|----|------|---|----|
|  | CLUS              | ELDESLQVAER   | 2/y4 | 644.82 | 474.27 | 649.83 | 484.28 | 32 | 21.4 |   | 10 |
|  | CLUS              | ELDESLQVAER   | 2/y3 | 644.82 | 375.2  | 649.83 | 385.21 | 27 | 21.4 | * | 10 |
|  | C1<br>inactivator | LLDSLPSDTR    | 2/y5 | 558.8  | 575.28 | 563.8  | 585.29 | 24 | 22   | * | 5  |
|  | C1<br>inactivator | LLDSLPSDTR    | 2/y8 | 558.8  | 890.42 | 563.8  | 900.43 | 28 | 22   |   | 5  |
|  | C1<br>inactivator | LLDSLPSDTR    | 2/b4 | 558.8  | 429.23 | 563.8  | 429.23 | 27 | 22   |   | 5  |
|  | CFB               | EELLPAQDIK    | 2/y6 | 578.32 | 671.37 | 581.33 | 677.39 | 24 | 23.7 | * | 10 |
|  | CFB               | EELLPAQDIK    | 2/y7 | 578.32 | 784.46 | 581.33 | 790.48 | 26 | 23.7 |   | 10 |
|  | CFB               | EELLPAQDIK    | 2/y8 | 578.32 | 897.54 | 581.33 | 903.56 | 24 | 23.7 |   | 10 |
|  | CFAH              | SPDVINGSPISQK | 2/b4 | 671.35 | 399.19 | 674.36 | 399.19 | 34 | 19.7 |   | 2  |
|  | CFAH              | SPDVINGSPISQK | 2/y8 | 671.35 | 830.44 | 674.36 | 836.46 | 33 | 19.7 | * | 2  |
|  | CFAH              | SPDVINGSPISQK | 2/y9 | 671.35 | 943.52 | 674.36 | 949.54 | 35 | 19.7 |   | 2  |
|  | CRP               | ESDTSYVSLK    | 2/y6 | 564.77 | 696.39 | 567.78 | 702.41 | 28 | 17.6 |   | 2  |
|  | CRP               | ESDTSYVSLK    | 2/y5 | 564.77 | 609.36 | 567.78 | 615.38 | 24 | 17.6 |   | 2  |
|  | CRP               | ESDTSYVSLK    | 2/y3 | 564.77 | 347.23 | 567.78 | 353.25 | 24 | 17.6 | * | 2  |
|  | A2AP              | LGNQEPGGQTALK | 2/y8 | 656.85 | 771.44 | 660.85 | 779.45 | 34 | 13.1 | * | 2  |

|  |      |                  |           |        |         |        |         |      |      |   |     |
|--|------|------------------|-----------|--------|---------|--------|---------|------|------|---|-----|
|  | A2AP | LGNQEPGGQTALK    | 2/b5      | 656.85 | 542.26  | 660.85 | 542.26  | 29   | 13.1 |   | 2   |
|  | A2AP | LGNQEPGGQTALK    | 2/y9      | 656.85 | 900.48  | 660.85 | 908.49  | 36   | 13.1 |   | 2   |
|  | GELS | TGAQELLR         | 2/y4      | 444.25 | 530.33  | 447.26 | 536.35  | 24   | 16   |   | 20  |
|  | GELS | TGAQELLR         | 2/y5      | 444.25 | 658.39  | 447.26 | 664.41  | 25   | 16   | * | 20  |
|  | GELS | TGAQELLR         | 2/y6      | 444.25 | 729.43  | 447.26 | 735.45  | 25   | 16   |   | 20  |
|  | KNG1 | TVGSDFYFSK       | 2/y9      | 626.3  | 1051.47 | 630.31 | 1059.49 | 27   | 27.1 | * | 5   |
|  | KNG1 | TVGSDFYFSK       | 2/y6      | 626.3  | 792.39  | 630.31 | 800.41  | 34.5 | 27.1 |   | 5   |
|  | KNG1 | TVGSDFYFSK       | 2/y7      | 626.3  | 907.42  | 630.31 | 915.43  | 27   | 27.1 |   | 5   |
|  | RBP  | YWGVASFLQK       | 2/y8      | 599.82 | 849.48  | 603.82 | 857.5   | 30   | 38.6 | * | 10  |
|  | RBP  | YWGVASFLQK       | 2/y6      | 599.82 | 693.39  | 603.82 | 701.41  | 27   | 38.6 |   | 10  |
|  | RBP  | YWGVASFLQK       | 2/y5      | 599.82 | 622.36  | 603.82 | 630.37  | 31   | 38.6 |   | 10  |
|  | SAMP | VGEYSLYIGR       | 2/y6      | 578.8  | 708.4   | 583.81 | 718.41  | 33   | 26.4 |   | 5   |
|  | SAMP | VGEYSLYIGR       | 2/y4      | 578.8  | 508.29  | 583.81 | 518.3   | 27   | 26.4 | * | 5   |
|  | SAMP | VGEYSLYIGR       | 2/y7      | 578.8  | 871.47  | 583.81 | 881.48  | 30   | 26.4 |   | 5   |
|  | ZA2G | EIPAWVPFDPAAQITK | 2/y14(2+) | 891.97 | 770.91  | 894.98 | 773.92  | 35   | 45.2 |   | 100 |
|  | ZA2G | EIPAWVPFDPAAQITK | 2/y10     | 891.97 | 1087.58 | 894.98 | 1093.6  | 40   | 45.2 | * | 100 |

|  |      |                  |           |        |        |        |         |    |      |   |     |
|--|------|------------------|-----------|--------|--------|--------|---------|----|------|---|-----|
|  | ZA2G | EIPAWVPFDPAAQITK | 2/b6      | 891.97 | 696.37 | 894.98 | 696.37  | 34 | 45.2 |   | 100 |
|  | FA12 | VVGGLVALR        | 2/y7      | 442.29 | 685.44 | 447.29 | 695.44  | 22 | 25   | * | 2   |
|  | FA12 | VVGGLVALR        | 2/y4      | 442.29 | 458.31 | 447.29 | 468.32  | 22 | 25   |   | 2   |
|  | FA12 | VVGGLVALR        | 2/y8      | 442.29 | 784.5  | 447.29 | 794.51  | 26 | 25   |   | 2   |
|  | CO3  | TGLQEVEVK        | 2/y6      | 501.78 | 731.39 | 505.78 | 739.41  | 26 | 16.8 | * | 20  |
|  | CO3  | TGLQEVEVK        | 2/y5      | 501.78 | 603.33 | 505.78 | 611.35  | 28 | 16.8 |   | 20  |
|  | CO3  | TGLQEVEVK        | 2/y7(2+)  | 501.78 | 422.74 | 505.78 | 426.75  | 24 | 16.8 |   | 20  |
|  | FINC | VPGTSTSATLTGLTR  | 2/y14(2+) | 731.4  | 681.86 | 736.4  | 686.87  | 39 | 24   | * | 5   |
|  | FINC | VPGTSTSATLTGLTR  | 2/y9      | 731.4  | 919.52 | 736.4  | 929.53  | 45 | 24   |   | 5   |
|  | FINC | VPGTSTSATLTGLTR  | 2/y11     | 731.4  | 1107.6 | 736.4  | 1117.61 | 43 | 24   |   | 5   |
|  | HPT  | VGYSVGWGR        | 2/y5      | 490.75 | 562.27 | 495.76 | 572.28  | 26 | 20.9 | * | 100 |
|  | HPT  | VGYSVGWGR        | 2/y6      | 490.75 | 661.34 | 495.76 | 671.35  | 26 | 20.9 |   | 100 |
|  | HPT  | VGYSVGWGR        | 2/y4      | 490.75 | 475.24 | 495.76 | 485.25  | 21 | 20.9 |   | 100 |
|  | HEMO | NFPSPVDAEFR      | 2/y9(2+)  | 610.81 | 480.25 | 615.81 | 485.26  | 24 | 30.8 | * | 20  |
|  | HEMO | NFPSPVDAEFR      | 2/y7      | 610.81 | 775.41 | 615.81 | 785.42  | 32 | 30.8 |   | 20  |
|  | HEMO | NFPSPVDAEFR      | 2/y8      | 610.81 | 862.44 | 615.81 | 872.45  | 34 | 30.8 |   | 20  |



|  |        |                  |      |        |        |        |        |    |      |   |   |
|--|--------|------------------|------|--------|--------|--------|--------|----|------|---|---|
|  | HRG    | DGYLFQLLR        | 2/y5 | 562.81 | 676.41 | 567.81 | 686.42 | 25 | 44.7 | * | 5 |
|  | HRG    | DGYLFQLLR        | 2/y6 | 562.81 | 789.5  | 567.81 | 799.51 | 28 | 44.7 |   | 5 |
|  | HRG    | DGYLFQLLR        | 2/b3 | 562.81 | 336.12 | 567.81 | 336.12 | 25 | 44.7 |   | 5 |
|  | Q9UJ43 | AEIEYLEK         | 2/y6 | 497.76 | 794.43 | 501.77 | 802.44 | 21 | 19.4 | * | 2 |
|  | Q9UJ43 | AEIEYLEK         | 2/y5 | 497.76 | 681.35 | 501.77 | 689.36 | 23 | 19.4 |   | 2 |
|  | Q9UJ43 | AEIEYLEK         | 2/y4 | 497.76 | 552.3  | 501.77 | 560.32 | 30 | 19.4 |   | 2 |
|  | VTNC   | FEDGVLPDYPR      | 2/y5 | 711.83 | 647.31 | 716.83 | 657.32 | 44 | 27.7 |   | 5 |
|  | VTNC   | FEDGVLPDYPR      | 2/b5 | 711.83 | 548.24 | 716.83 | 548.24 | 28 | 27.7 |   | 5 |
|  | VTNC   | FEDGVLPDYPR      | 2/y7 | 711.83 | 875.43 | 716.83 | 885.43 | 32 | 27.7 | * | 5 |
|  | FPA    | ADSGEGDFLAEGGGVR | 2/y7 | 768.85 | 645.33 | 773.85 | 655.34 | 37 | 23.5 | * | 5 |
|  | FPA    | ADSGEGDFLAEGGGVR | 2/y5 | 768.85 | 445.25 | 773.85 | 455.26 | 40 | 23.5 |   | 5 |
|  | FPA    | ADSGEGDFLAEGGGVR | 2/y8 | 768.85 | 758.42 | 773.85 | 768.42 | 39 | 23.5 |   | 5 |

**Supplemental Table S3.** The disease associations of the target proteins

|    | Protein | Name                          | Disease/Literatures                                                                                      |
|----|---------|-------------------------------|----------------------------------------------------------------------------------------------------------|
| 1  | A1AG1   | Alpha-1-acid glycoprotein 1   | cervical cancer <sup>1</sup> , gastric cancer <sup>2</sup> , breast cancer <sup>3</sup>                  |
| 2  | A1AT    | Alpha-1-anti-trypsin          | breast cancer <sup>3</sup>                                                                               |
| 3  | A1BG    | Alpha-1B-glycoprotein         | non-small cell lung cancer <sup>4</sup>                                                                  |
| 4  | A2AP    | Alpha-2-antiplasmin           | Thrombosis <sup>5</sup> , bladder cancer <sup>6</sup>                                                    |
| 5  | A2MG    | alpha-2-macroglobulin         | hepatocellular carcinoma <sup>7</sup>                                                                    |
| 6  | AACT    | Alpha-1-antichymotrypsin      | pancreatic cancer <sup>8,9</sup>                                                                         |
| 7  | ADIPO   | Adiponectin                   | breast cancer <sup>10</sup> , Endometrial Cancer <sup>10</sup>                                           |
| 8  | AFAM    | Afamin                        | polycystic ovary syndrome <sup>11</sup> , thyroid carcinoma <sup>12</sup> , ovarian cancer <sup>13</sup> |
| 9  | ALBU    | Albumin                       | colorectal cancer <sup>14</sup> , lung cancer <sup>15</sup> , bladder cancer <sup>6</sup>                |
| 10 | ANGT    | Angiotensinogen               | colorectal cancer <sup>16</sup> , colon cancer <sup>17</sup>                                             |
| 11 | ANT3    | Antithrombin-III              | hepatocellular carcinoma <sup>18</sup> , primary central nervous system lymphoma <sup>19</sup>           |
| 12 | ANXA5   | Annexin A5                    | prostate cancer <sup>20</sup> , Glioblastoma multiforme <sup>21</sup>                                    |
| 13 | APOA1   | Apolipoprotein A1             | bladder cancer <sup>6,22</sup> , ovarian cancer <sup>23</sup>                                            |
| 14 | APOA2   | Apolipoprotein A-II precursor | bladder cancer <sup>6,22,24</sup> , ovarian cancer <sup>25</sup>                                         |
| 15 | APOA4   | Apolipoprotein A-IV           | cervical cancer <sup>26</sup> , ovarian cancer <sup>27</sup>                                             |
| 16 | APOB    | Apolipoprotein B-100          | bladder cancer <sup>28,29</sup> , colorectal cancer <sup>30</sup>                                        |

|    |                   |                                              |                                                                                                       |
|----|-------------------|----------------------------------------------|-------------------------------------------------------------------------------------------------------|
| 17 | APOC1             | Apolipoprotein C-I lipoprotein               | hepatitis C virus <sup>31</sup> ,<br>ovarian cancer <sup>25</sup> , stomach<br>cancer <sup>32</sup>   |
| 18 | APOC3             | Apolipoprotein C-III                         | stomach cancer <sup>32</sup>                                                                          |
| 19 | APOD              | Apolipoprotein D                             | colorectal cancer <sup>33</sup> , breast<br>cancer <sup>34</sup>                                      |
| 20 | APOE              | Apolipoprotein E                             | colorectal cancer <sup>16</sup> ,                                                                     |
| 21 | APOH              | apolipoprotein H (beta-2-<br>glycoprotein I) | breast cancer <sup>35</sup> , non-small<br>cell lung cancer <sup>36</sup>                             |
| 22 | APOL1             | Apolipoprotein L1                            | kidney diseases <sup>37,38</sup> , renal<br>cancer <sup>39</sup>                                      |
| 23 | C1<br>inactivator | Complement C1 inactivator                    | hepatocellular carcinoma <sup>40</sup> ,<br>hereditary angioedema <sup>41</sup>                       |
| 24 | CERU              | Ceruloplasmin                                | breast cancer <sup>42</sup> ,<br>pancreatic cancer <sup>43</sup>                                      |
| 25 | CFAH              | Complement factor H                          | liver disease <sup>44</sup> , squamous cell<br>carcinoma <sup>45</sup> , ovarian cancer <sup>46</sup> |
| 26 | CFB               | Complement factor B                          | pancreatic ductal<br>adenocarcinoma <sup>47</sup> ,<br>nasopharyngeal carcinoma <sup>48</sup>         |
| 27 | CLUS              | Clusterin                                    | hepatocellular carcinoma <sup>49</sup> ,<br>esophageal cancer <sup>50</sup>                           |
| 28 | CO3               | Complement C3                                | retinal degenerative diseases<br><sup>51</sup> , neuroblastoma<br><sup>52</sup>                       |
| 29 | CO9               | Complement C9                                | lung cancer <sup>53</sup>                                                                             |
| 30 | CRP               | C-Reactive protein                           | lung cancer <sup>15</sup> , bladder cancer<br><sup>6</sup>                                            |
| 31 | FA12              | Coagulation factor XIIIa LC                  | bladder cancer <sup>6</sup>                                                                           |
| 32 | FETUA             | alpha-2-HS-glycoprotein                      | cervical cancer <sup>1</sup> , colorectal<br>cancer <sup>54</sup>                                     |
| 33 | FIBA              | Fibrinogen alpha chain                       | bladder cancer <sup>6</sup>                                                                           |
| 34 | FIBB              | Fibrinogen beta chain                        | bladder cancer <sup>6,55</sup> , oral<br>squamous cell carcinoma <sup>56</sup>                        |

|    |        |                                             |                                                                                |
|----|--------|---------------------------------------------|--------------------------------------------------------------------------------|
| 35 | FIBG   | Fibrinogen gamma chain                      | prostate-, lung-, and breast-cancer <sup>4</sup> , bladder cancer <sup>6</sup> |
| 36 | FINC   | Fibronectin                                 | Breast cancer <sup>15,57</sup>                                                 |
| 37 | FPA    | Fibrinopeptide A                            | gastric cancer <sup>58</sup> , non-alcoholic fatty liver disease <sup>59</sup> |
| 38 | GELS   | Gelsolin, isoform 1                         | cervical cancer <sup>60</sup> , liver and kidney toxicity <sup>61</sup>        |
| 39 | HEMO   | Hemopexin                                   | IgA nephropathy <sup>62</sup> , oral squamous cell carcinoma <sup>63</sup>     |
| 40 | HEP2   | Heparin cofactor II                         | mucopolysaccharidosis <sup>64</sup> , bladder cancer <sup>22</sup>             |
| 41 | HPT    | Haptoglobin beta chain                      | cervical cancer <sup>1</sup> , lung cancer <sup>65</sup>                       |
| 42 | HRG    | Histidine-rich glycoprotein                 | breast cancer <sup>66</sup> , colorectal cancer <sup>67</sup>                  |
| 43 | ITIH1  | Inter-alpha-trypsin Inhibitor heavy chain 1 | urothelial neoplasm <sup>68</sup> , bladder cancer <sup>6</sup>                |
| 44 | KNG1   | Kininogen-1                                 | colorectal cancer <sup>69</sup> , gastric cancer <sup>70</sup>                 |
| 45 | PLMN   | Plasminogen                                 | cancer <sup>71</sup> , gastric cancer <sup>72</sup>                            |
| 46 | Q9UJ43 | L-selectin                                  | bladder cancer <sup>6,73</sup>                                                 |
| 47 | RBP    | Plasma retinol-binding protein              | cardiovascular disease <sup>74</sup> , ovarian cancer <sup>75</sup>            |
| 48 | SAA4   | Serum amyloid A-4 protein                   | bladder cancer <sup>28</sup> , ovarian carcinomas <sup>76</sup>                |
| 49 | SAMP   | Serum amyloid P-component                   | acute myocardial infarction <sup>77</sup> , kidney diseases <sup>78</sup>      |
| 50 | THRB   | Prothrombin                                 | prostate cancer <sup>79</sup> , hepatocellular carcinoma <sup>80</sup>         |
| 51 | TRFE   | Transferrin                                 | colon cancer <sup>81</sup> , ovarian cancer <sup>82</sup>                      |
| 52 | TSP1   | Thrombospondin-1                            | pancreatic cancer <sup>20</sup> , non-small cell lung cancer <sup>83</sup>     |

|    |      |                           |                                                                                                 |
|----|------|---------------------------|-------------------------------------------------------------------------------------------------|
| 53 | TTHY | Transthyretin             | lung cancer and lung infection <sup>84</sup> , pancreatic ductal adenocarcinoma <sup>85</sup>   |
| 54 | VTDB | Vitamin D-binding protein | cervical cancer <sup>1</sup> , colorectal cancer <sup>16</sup> ,                                |
| 55 | VTNC | Vitronectin               | ovarian cancer <sup>86</sup> , gastric adenocarcinoma <sup>87</sup>                             |
| 56 | ZA2G | Zinc-alpha-2-glycoprotein | colon cancer <sup>88</sup> , prostate cancer <sup>89</sup> , diabetic nephropathy <sup>90</sup> |

**Supplemental Table S4.** LOD and LLOQ of the 56 salivary peptides determined using the standard saliva sample which was pooled equal amounts of proteins from three individuals.

LOD is defined as the lowest level in the calibration curve at which a signal is observed for the endogenous target in all three processed replicates with a signal to noise ratio (S/N) above 20:1. LLOQ is defined as the lowest concentration in the calibration curves of natural peptides which can be measured with S/N>20 and <20% CV in three processed replicates which were independently digested.

The LOD and LLOQ values are reported as injection amount on column (amol/ $\mu$ g total salivary protein). The LOD and LLOQ values are also reported as protein concentration (ng/mL) on the basis of average total salivary protein concentration (2013  $\mu$ g/ml) of the standard saliva sample (sample I).

N/A: Not available from the analysis of standard urine sample with CV below 20% (n=3).

The protein concentration of each target is expressed in ng/ml of saliva, which is exactly the same as the determined level of the proteotypic peptide by assuming complete tryptic digestion (i.e., 100% recovery). 0.9  $\mu$ g of tryptic peptides were injected on column for each LC-MRM-MS analysis.

| Protein name | Ion transition | MW(Da) | SIS conc. (fmol/ $\mu$ g) | LOD             |         |                                   | LLOQ            |         |                                   |
|--------------|----------------|--------|---------------------------|-----------------|---------|-----------------------------------|-----------------|---------|-----------------------------------|
|              |                |        |                           | (amol/ $\mu$ g) | (ng/ml) | amounts injected on column (amol) | (amol/ $\mu$ g) | (ng/ml) | amounts injected on column (amol) |
| A1AG1        | 3/y13(2+)      | 23,512 | 20                        | 5628.0          | 266.4   | 5065.2                            | 5628.00         | 266.37  | 5065.2                            |
| A1AT         | 2/y6           | 46,737 | 20                        | 654.8           | 61.6    | 589.3                             | 654.78          | 61.60   | 589.3                             |
| A1BG         | 2/y7           | 54,254 | 10                        | 0.2             | 0.0     | 0.2                               | 84.24           | 9.20    | 75.8                              |

|       |           |         |      |       |      |       |        |       |       |
|-------|-----------|---------|------|-------|------|-------|--------|-------|-------|
| A2AP  | 2/y8      | 54,566  | 2    | 4.3   | 0.5  | 3.9   | 8.55   | 0.94  | 7.7   |
| A2MG  | 3/y6      | 163,291 | 20   | 2.9   | 0.9  | 2.6   | 143.28 | 47.10 | 129.0 |
| AACT  | 2/y5      | 47,651  | 2    | 5.2   | 0.5  | 4.7   | 5.16   | 0.49  | 4.6   |
| ADIPO | 3/y13(2+) | 26,414  | 10   | 11.5  | 0.6  | 10.4  | 22.98  | 1.22  | 20.7  |
| AFAM  | 2/y7(2+)  | 69,069  | 10   | 38.1  | 5.3  | 34.3  | 380.70 | 52.93 | 342.6 |
| ALBU  | 2/y5      | 69,367  | 1000 | 663.2 | 92.6 | 596.9 | 663.24 | 92.61 | 596.9 |
| ANGT  | 2/y10(2+) | 53,154  | 5    | 49.8  | 5.3  | 44.8  | 49.82  | 5.33  | 44.8  |
| ANT3  | 2/y6      | 52,602  | 10   | 29.8  | 3.2  | 26.8  | 596.70 | 63.18 | 537.0 |
| ANXA5 | 2/y6      | 35,937  | 5    | 19.5  | 1.4  | 17.6  | 19.50  | 1.41  | 17.6  |
| APOA1 | 3/y9(2+)  | 30,778  | 50   | 52.7  | 3.3  | 47.4  | 52.70  | 3.26  | 47.4  |
| APOA2 | 2/y8(2+)  | 11,175  | 10   | 22.8  | 0.5  | 20.5  | 227.99 | 5.13  | 205.2 |
| APOA4 | 2/y9(2+)  | 45,399  | 2    | 10.9  | 1.0  | 9.8   | 43.60  | 3.98  | 39.2  |
| APOB  | 2/y8(2+)  | 515,605 | 2    | 1.3   | 1.4  | 1.2   | 2.61   | 2.71  | 2.3   |
| APOC1 | 2/y6      | 9,332   | 5    | 16.6  | 0.3  | 14.9  | 16.62  | 0.31  | 15.0  |
| APOC3 | 2/y8      | 10,852  | 5    | 5.5   | 0.1  | 5.0   | 54.90  | 1.20  | 49.4  |
| APOD  | 2/y8(2+)  | 21,276  | 2    | 5.8   | 0.2  | 5.2   | 116.73 | 5.00  | 105.1 |
| APOE  | 2/y7(2+)  | 36,154  | 1    | 3.3   | 0.2  | 3.0   | 16.37  | 1.19  | 14.7  |

|                |           |         |    |        |       |       |         |        |        |
|----------------|-----------|---------|----|--------|-------|-------|---------|--------|--------|
| APOH           | 2/y6      | 38,298  | 5  | 44.6   | 3.4   | 40.1  | 44.56   | 3.44   | 40.1   |
| APOL1          | 2/y12(2+) | 43,974  | 10 | 180.0  | 15.9  | 162.0 | 900.00  | 79.67  | 810.0  |
| C1 inactivator | 2/y5      | 55,154  | 5  | 0.5    | 0.1   | 0.5   | 23.90   | 2.65   | 21.5   |
| CERU           | 2/y4      | 122,205 | 5  | 107.5  | 26.4  | 96.8  | 107.49  | 26.44  | 96.7   |
| CFAH           | 2/y8      | 139,096 | 2  | 12.2   | 3.4   | 11.0  | 24.37   | 6.82   | 21.9   |
| CFB            | 2/y6      | 85,533  | 10 | 51.9   | 8.9   | 46.7  | 51.90   | 8.94   | 46.7   |
| CLUS           | 2/y3      | 52,495  | 10 | 1.2    | 0.1   | 1.1   | 116.25  | 12.28  | 104.6  |
| CO3            | 2/y6      | 187,148 | 20 | 173.3  | 65.3  | 156.0 | 173.34  | 65.30  | 156.0  |
| CO9            | 3/b5      | 63,173  | 20 | 1110.0 | 141.2 | 999.0 | 1110.00 | 141.16 | 999.0  |
| CRP            | 2/y3      | 25,039  | 2  | 22.6   | 1.1   | 20.3  | 225.90  | 11.39  | 203.3  |
| FA12           | 2/y7      | 67,792  | 2  | 6.4    | 0.9   | 5.8   | 25.57   | 3.49   | 23.0   |
| FETUA          | 3/y4      | 39,325  | 5  | 78.1   | 6.2   | 70.3  | 78.08   | 6.18   | 70.3   |
| FIBA           | 2/y5      | 94,973  | 5  | 43.5   | 8.3   | 39.2  | 87.03   | 16.64  | 78.3   |
| FIBB           | 2/y7      | 55,928  | 50 | 7.1    | 0.8   | 6.4   | 355.73  | 40.05  | 320.2  |
| FIBG           | 3/y9(2+)  | 51,512  | 2  | 0.1    | 0.0   | 0.1   | 11.55   | 1.20   | 10.4   |
| FINC           | 2/y14(2+) | 262,625 | 5  | 23.4   | 12.4  | 21.1  | 46.89   | 24.79  | 42.2   |
| FPA            | 2/y7      | 94,973  | 5  | 94.1   | 18.0  | 84.7  | 1882.50 | 359.90 | 1694.3 |



|        |          |         |     |       |       |       |        |        |       |
|--------|----------|---------|-----|-------|-------|-------|--------|--------|-------|
| GELS   | 2/y5     | 85,698  | 20  | 117.2 | 20.2  | 105.5 | 117.15 | 20.21  | 105.5 |
| HEMO   | 2/y9(2+) | 51,676  | 20  | 7.6   | 0.8   | 6.8   | 377.79 | 39.30  | 340.0 |
| HEP2   | 2/y7     | 57,071  | 2   | 4.1   | 0.5   | 3.7   | 20.64  | 2.37   | 18.6  |
| HPT    | 2/y5     | 45,205  | 100 | 8.8   | 0.8   | 7.9   | 439.22 | 39.97  | 395.3 |
| HRG    | 2/y5     | 59,578  | 5   | 32.0  | 3.8   | 28.8  | 32.00  | 3.84   | 28.8  |
| ITIH1  | 2/y9     | 101,389 | 2   | 11.5  | 2.3   | 10.4  | 22.97  | 4.69   | 20.7  |
| KNG1   | 2/y9     | 38,720  | 5   | 0.1   | 0.0   | 0.1   | 100.37 | 14.54  | 90.3  |
| PLMN   | 2/y5     | 71,957  | 2   | 13.0  | 2.4   | 11.7  | 12.98  | 2.37   | 11.7  |
| Q9UJ43 | 2/y6     | 42,187  | 2   | 22.3  | 1.9   | 20.1  | 44.57  | 3.79   | 40.1  |
| RBP    | 2/y8     | 23,010  | 10  | 0.1   | 0.0   | 0.1   | 559.80 | 25.93  | 503.8 |
| SAA4   | 2/y8(2+) | 14,747  | 5   | 255.2 | 7.6   | 229.7 | 255.15 | 7.57   | 229.6 |
| SAMP   | 2/y4     | 25,387  | 5   | 21.8  | 1.1   | 19.6  | 218.25 | 11.15  | 196.4 |
| THRB   | 2/y8     | 70,037  | 5   | 39.9  | 5.6   | 35.9  | N/A    | N/A    | N/A   |
| TRFE   | 2/y7     | 77,064  | 100 | 681.2 | 105.7 | 613.1 | 681.15 | 105.67 | 613.0 |
| TSP1   | 2/y6     | 129,383 | 5   | 9.8   | 2.6   | 8.8   | 49.20  | 12.81  | 44.3  |
| TTHY   | 2/y8     | 15,887  | 20  | 413.3 | 13.2  | 372.0 | 413.34 | 13.22  | 372.0 |
| VTDB   | 2/y8     | 52,964  | 20  | 72.8  | 7.8   | 65.5  | 72.81  | 7.76   | 65.5  |

|      |       |        |     |     |     |     |         |        |        |
|------|-------|--------|-----|-----|-----|-----|---------|--------|--------|
| VTNC | 2/y7  | 54,306 | 5   | 2.5 | 0.3 | 2.3 | 246.47  | 26.94  | 221.8  |
| ZA2G | 2/y10 | 34,259 | 100 | 7.4 | 0.5 | 6.7 | 7428.00 | 512.26 | 6685.2 |

---

**Supplemental Table S5.** The average concentration of control and OSCCC patients. The data of clinical group 1 (n=61) and group 2 (n=58) are expressed as fmol/μg in (A) and (C) and ng/mL in (B) and (D). The data of all 119 individual samples are expressed as (E) fmol/μg and (F) ng/mL.

(A)

| Protein | Control (n=29)          |                                  |                                    |                         | OSCC (n=32)                      |                                    |                                    |  |
|---------|-------------------------|----------------------------------|------------------------------------|-------------------------|----------------------------------|------------------------------------|------------------------------------|--|
|         | Concentration (fmol/μg) | Detectable case No. <sup>a</sup> | Quantifiable case No. <sup>b</sup> | Concentration (fmol/μg) | Detectable case No. <sup>a</sup> | Quantifiable case No. <sup>b</sup> | Quantifiable case No. <sup>b</sup> |  |
| A1AG1   | 1.30 ± 1.38             | (1/29)                           | (1/29)                             | 2.29 ± 2.28             | (2/32)                           | (2/32)                             | (2/32)                             |  |
| A1AT    | 13.04 ± 38.10           | (25/29)                          | (25/29)                            | 24.18 ± 34.58           | (32/32)                          | (32/32)                            | (32/32)                            |  |
| A1BG    | 8.89 ± 7.48             | (29/29)                          | (29/29)                            | 22.06 ± 17.25           | (32/32)                          | (32/32)                            | (32/32)                            |  |
| A2AP    | 0.21 ± 0.30             | (28/29)                          | (28/29)                            | 0.51 ± 0.60             | (30/32)                          | (28/32)                            | (28/32)                            |  |
| A2MG    | 33.55 ± 31.98           | (29/29)                          | (29/29)                            | 63.06 ± 55.67           | (32/32)                          | (32/32)                            | (32/32)                            |  |
| AACT    | 1.22 ± 2.80             | (27/29)                          | (27/29)                            | 2.86 ± 4.21             | (32/32)                          | (32/32)                            | (32/32)                            |  |
| ADIPO   | 0.01 ± 0.02             | (8/29)                           | (2/29)                             | 0.03 ± 0.03             | (22/32)                          | (16/32)                            | (16/32)                            |  |
| AFAM    | 0.58 ± 0.68             | (29/29)                          | (13/29)                            | 1.82 ± 1.30             | (32/32)                          | (28/32)                            | (28/32)                            |  |
| ALBU    | 2034.41 ± 1773.94       | (29/29)                          | (29/29)                            | 4695.45 ± 2679.85       | (32/32)                          | (32/32)                            | (32/32)                            |  |
| ANGT    | 0.89 ± 0.94             | (26/29)                          | (26/29)                            | 2.47 ± 1.46             | (32/32)                          | (32/32)                            | (32/32)                            |  |
| ANT3    | 0.26 ± 0.36             | (24/29)                          | (1/29)                             | 1.00 ± 1.40             | (32/32)                          | (14/32)                            | (14/32)                            |  |

|                |         |       |         |         |         |       |         |         |
|----------------|---------|-------|---------|---------|---------|-------|---------|---------|
| ANXA5          | 0.18 ±  | 0.15  | (27/29) | (27/29) | 0.65 ±  | 0.81  | (30/32) | (30/32) |
| APOA1          | 8.47 ±  | 22.01 | (28/29) | (28/29) | 22.83 ± | 45.26 | (32/32) | (32/32) |
| APOA2          | 1.72 ±  | 3.26  | (26/29) | (23/29) | 5.86 ±  | 6.95  | (29/32) | (28/32) |
| APOA4          | 0.17 ±  | 0.76  | (11/29) | (7/29)  | 0.31 ±  | 0.55  | (17/32) | (15/32) |
| APOB           | 0.03 ±  | 0.05  | (27/29) | (24/29) | 0.12 ±  | 0.15  | (32/32) | (31/32) |
| APOC1          | 0.12 ±  | 0.15  | (21/29) | (21/29) | 0.22 ±  | 0.30  | (30/32) | (30/32) |
| APOC3          | 0.13 ±  | 0.22  | (27/29) | (12/29) | 0.23 ±  | 0.43  | (27/32) | (18/32) |
| APOD           | 0.37 ±  | 0.59  | (18/29) | (13/29) | 0.83 ±  | 0.82  | (24/32) | (21/32) |
| APOE           | 0.06 ±  | 0.11  | (29/29) | (20/29) | 0.10 ±  | 0.16  | (32/32) | (25/32) |
| APOH           | 2.78 ±  | 2.49  | (29/29) | (29/29) | 11.00 ± | 6.98  | (32/32) | (32/32) |
| APOL1          | 0.21 ±  | 0.21  | (13/29) | (1/29)  | 0.43 ±  | 0.50  | (23/32) | (5/32)  |
| C1 inactivator | 0.36 ±  | 0.52  | (29/29) | (25/29) | 1.00 ±  | 0.94  | (32/32) | (31/32) |
| CERU           | 1.50 ±  | 1.27  | (24/29) | (24/29) | 4.74 ±  | 3.62  | (32/32) | (32/32) |
| CFAH           | 0.33 ±  | 0.23  | (29/29) | (28/29) | 2.63 ±  | 1.95  | (32/32) | (32/32) |
| CFB            | 0.71 ±  | 0.61  | (25/29) | (25/29) | 2.22 ±  | 1.97  | (32/32) | (32/32) |
| CLUS           | 12.13 ± | 7.72  | (29/29) | (29/29) | 16.51 ± | 12.73 | (32/32) | (32/32) |
| CO3            | 9.30 ±  | 6.79  | (27/29) | (27/29) | 20.47 ± | 12.32 | (32/32) | (32/32) |

|       |          |        |         |         |          |        |         |         |
|-------|----------|--------|---------|---------|----------|--------|---------|---------|
| CO9   | 0.18 ±   | 0.16   | (0/29)  | (0/29)  | 0.46 ±   | 0.66   | (4/32)  | (4/32)  |
| CRP   | 0.03 ±   | 0.03   | (9/29)  | (0/29)  | 0.18 ±   | 0.28   | (23/32) | (5/32)  |
| FA12  | 0.06 ±   | 0.07   | (28/29) | (18/29) | 0.29 ±   | 0.31   | (32/32) | (30/32) |
| FETUA | 0.93 ±   | 0.92   | (25/29) | (25/29) | 4.37 ±   | 3.64   | (30/32) | (30/32) |
| FIBA  | 0.31 ±   | 0.69   | (18/29) | (14/29) | 2.60 ±   | 4.94   | (25/32) | (23/32) |
| FIBB  | 5.09 ±   | 4.51   | (29/29) | (22/29) | 22.18 ±  | 18.59  | (32/32) | (30/32) |
| FIBG  | 0.00 ±   | 0.01   | (13/29) | (2/29)  | 0.02 ±   | 0.03   | (28/32) | (11/32) |
| FINC  | 0.49 ±   | 0.68   | (21/29) | (21/29) | 2.35 ±   | 2.42   | (29/32) | (28/32) |
| FPA   | 0.39 ±   | 0.34   | (24/29) | (0/29)  | 0.45 ±   | 1.21   | (13/32) | (1/32)  |
| GELS  | 23.29 ±  | 21.75  | (29/29) | (29/29) | 18.74 ±  | 9.53   | (32/32) | (32/32) |
| HEMO  | 29.54 ±  | 33.46  | (29/29) | (29/29) | 92.19 ±  | 58.37  | (32/32) | (32/32) |
| HEP2  | 0.16 ±   | 0.19   | (28/29) | (28/29) | 0.80 ±   | 0.76   | (32/32) | (32/32) |
| HPT   | 212.25 ± | 235.15 | (29/29) | (29/29) | 652.44 ± | 524.99 | (32/32) | (32/32) |
| HRG   | 1.53 ±   | 1.50   | (29/29) | (29/29) | 5.43 ±   | 5.40   | (32/32) | (32/32) |
| ITIH1 | 0.48 ±   | 0.54   | (29/29) | (29/29) | 1.92 ±   | 1.79   | (32/32) | (32/32) |
| KNG1  | 2.93 ±   | 2.79   | (29/29) | (26/29) | 9.23 ±   | 5.75   | (32/32) | (32/32) |
| PLMN  | 0.05 ±   | 0.06   | (21/29) | (21/29) | 0.15 ±   | 0.13   | (31/32) | (31/32) |

|        |          |        |         |         |          |        |         |         |
|--------|----------|--------|---------|---------|----------|--------|---------|---------|
| Q9UJ43 | 0.11 ±   | 0.17   | (12/29) | (12/29) | 0.21 ±   | 0.20   | (24/32) | (23/32) |
| RBP    | 9.72 ±   | 8.38   | (29/29) | (29/29) | 20.74 ±  | 16.77  | (32/32) | (32/32) |
| SAA4   | 1.57 ±   | 3.11   | (20/29) | (20/29) | 5.32 ±   | 7.39   | (25/32) | (25/32) |
| SAMP   | 0.14 ±   | 0.19   | (27/29) | (6/29)  | 0.74 ±   | 0.80   | (32/32) | (26/32) |
| THRB   | 0.01 ±   | 0.01   | (1/29)  | (0/29)  | 0.03 ±   | 0.04   | (6/32)  | (0/32)  |
| TRFE   | 22.97 ±  | 21.08  | (26/29) | (26/29) | 51.75 ±  | 29.90  | (32/32) | (32/32) |
| TSP1   | 1.75 ±   | 1.82   | (29/29) | (29/29) | 2.37 ±   | 2.66   | (31/32) | (31/32) |
| TTHY   | 54.22 ±  | 45.41  | (29/29) | (29/29) | 97.14 ±  | 76.35  | (32/32) | (32/32) |
| VTDB   | 4.99 ±   | 3.39   | (29/29) | (29/29) | 13.84 ±  | 8.43   | (32/32) | (32/32) |
| VTNC   | 1.08 ±   | 1.82   | (17/29) | (14/29) | 3.16 ±   | 2.07   | (32/32) | (31/32) |
| ZA2G   | 377.78 ± | 285.86 | (29/29) | (29/29) | 257.40 ± | 147.70 | (32/32) | (32/32) |

<sup>a</sup>: The LOD concentration is determined using the calibration curve with S/N>20. A sample with a protein concentration higher than its corresponding LOD value is defined as “Detectable” case for the protein.

<sup>b</sup>: The LLOQ concentration is determined using the calibration curve with S/N>20 and CV <20% CV in three replicates. A sample with a protein concentration higher than its corresponding LLOQ value is defined as “Quantifiable” case for the protein.

(B)

| Protein        | Control (n=29)        |           | OSCC (n=32)           |           |
|----------------|-----------------------|-----------|-----------------------|-----------|
|                | Concentration (ng/mL) |           | Concentration (ng/mL) |           |
| A1AG1          | 33.28 ±               | 37.23     | 81.04 ±               | 97.17     |
| A1AT           | 543.07 ±              | 1544.62   | 1758.60 ±             | 3537.29   |
| A1BG           | 481.15 ±              | 395.58    | 1713.31 ±             | 2004.16   |
| A2AP           | 11.56 ±               | 15.28     | 43.26 ±               | 68.75     |
| A2MG           | 5726.74 ±             | 5965.82   | 14668.31 ±            | 16736.19  |
| AACT           | 60.30 ±               | 127.63    | 175.16 ±              | 300.94    |
| ADIPO          | 0.29 ±                | 0.50      | 1.46 ±                | 2.42      |
| AFAM           | 41.87 ±               | 56.20     | 183.15 ±              | 171.19    |
| ALBU           | 143641.13 ±           | 145125.96 | 483893.48 ±           | 429197.66 |
| ANGT           | 48.84 ±               | 52.55     | 203.21 ±              | 182.94    |
| ANT3           | 14.07 ±               | 17.99     | 85.05 ±               | 166.13    |
| ANXA5          | 6.71 ±                | 6.73      | 30.34 ±               | 39.57     |
| APOA1          | 250.99 ±              | 593.70    | 1278.37 ±             | 3114.08   |
| APOA2          | 19.75 ±               | 33.92     | 99.41 ±               | 165.28    |
| APOA4          | 7.26 ±                | 30.42     | 21.13 ±               | 42.60     |
| APOB           | 14.81 ±               | 28.80     | 98.10 ±               | 128.68    |
| APOC1          | 1.15 ±                | 1.58      | 3.32 ±                | 5.19      |
| APOC3          | 1.47 ±                | 2.22      | 3.86 ±                | 8.09      |
| APOD           | 7.43 ±                | 11.84     | 30.13 ±               | 38.80     |
| APOE           | 2.34 ±                | 3.63      | 5.83 ±                | 11.79     |
| APOH           | 113.04 ±              | 107.34    | 602.11 ±              | 533.83    |
| APOL1          | 9.81 ±                | 9.46      | 29.47 ±               | 45.80     |
| C1 inactivator | 19.64 ±               | 27.11     | 74.85 ±               | 78.50     |
| CERU           | 176.97 ±              | 157.15    | 850.36 ±              | 915.91    |

|        |           |         |            |          |
|--------|-----------|---------|------------|----------|
| CFAH   | 54.41 ±   | 71.63   | 549.24 ±   | 600.94   |
| CFB    | 63.29 ±   | 64.60   | 285.63 ±   | 322.31   |
| CLUS   | 747.37 ±  | 741.67  | 1286.90 ±  | 1203.36  |
| CO3    | 1777.47 ± | 1541.32 | 5916.85 ±  | 5093.06  |
| CO9    | 11.77 ±   | 11.16   | 41.23 ±    | 63.64    |
| CRP    | 0.74 ±    | 0.97    | 6.38 ±     | 11.21    |
| FA12   | 4.15 ±    | 4.26    | 31.28 ±    | 47.04    |
| FETUA  | 45.27 ±   | 62.96   | 275.25 ±   | 349.67   |
| FIBA   | 33.83 ±   | 66.39   | 355.25 ±   | 798.33   |
| FIBB   | 315.02 ±  | 349.79  | 1952.38 ±  | 2150.04  |
| FIBG   | 0.20 ±    | 0.59    | 1.37 ±     | 3.39     |
| FINC   | 115.81 ±  | 150.99  | 954.65 ±   | 1449.58  |
| FPA    | 40.40 ±   | 40.45   | 61.49 ±    | 147.43   |
| GELS   | 2253.27 ± | 2639.18 | 2609.78 ±  | 2772.53  |
| HEMO   | 1570.68 ± | 1813.75 | 7012.91 ±  | 6737.99  |
| HEP2   | 8.68 ±    | 9.52    | 70.56 ±    | 92.74    |
| HPT    | 9375.74 ± | 9181.16 | 46882.78 ± | 46925.97 |
| HRG    | 95.40 ±   | 112.75  | 456.21 ±   | 628.46   |
| ITIH1  | 49.74 ±   | 52.69   | 292.93 ±   | 382.55   |
| KNG1   | 218.13 ±  | 239.91  | 1013.00 ±  | 986.62   |
| PLMN   | 4.76 ±    | 5.72    | 20.78 ±    | 25.35    |
| Q9UJ43 | 5.10 ±    | 10.76   | 13.46 ±    | 14.91    |
| RBP    | 234.15 ±  | 236.57  | 740.74 ±   | 929.69   |
| SAA4   | 22.12 ±   | 39.81   | 128.44 ±   | 218.69   |
| SAMP   | 3.27 ±    | 3.46    | 22.84 ±    | 21.18    |
| THRB   | 0.74 ±    | 0.80    | 2.47 ±     | 3.42     |
| TRFE   | 1907.94 ± | 2162.66 | 6197.51 ±  | 5843.15  |
| TSP1   | 321.42 ±  | 539.21  | 458.19 ±   | 643.89   |



|      |            |          |            |         |
|------|------------|----------|------------|---------|
| TTHY | 928.43 ±   | 962.84   | 2405.03 ±  | 2548.05 |
| VTDB | 266.80 ±   | 218.23   | 1098.77 ±  | 1104.40 |
| VTNC | 55.38 ±    | 132.28   | 253.80 ±   | 243.45  |
| ZA2G | 14303.24 ± | 14270.59 | 11206.80 ± | 7325.05 |

---

(C)

| Protein | Control (n=29)                |         |                                  |                                    | OSCC (n=29)                   |         |                                  |                                    |
|---------|-------------------------------|---------|----------------------------------|------------------------------------|-------------------------------|---------|----------------------------------|------------------------------------|
|         | Concentration (fmol/ $\mu$ g) |         | Detectable case No. <sup>a</sup> | Quantifiable case No. <sup>b</sup> | Concentration (fmol/ $\mu$ g) |         | Detectable case No. <sup>a</sup> | Quantifiable case No. <sup>b</sup> |
| A1AG1   | 0.61 $\pm$                    | 0.80    | (0/29)                           | (0/29)                             | 0.81 $\pm$                    | 0.59    | (0/29)                           | (0/29)                             |
| A1AT    | 4.46 $\pm$                    | 13.18   | (22/29)                          | (22/29)                            | 47.76 $\pm$                   | 91.09   | (29/29)                          | (29/29)                            |
| A1BG    | 6.06 $\pm$                    | 5.35    | (29/29)                          | (29/29)                            | 21.55 $\pm$                   | 22.96   | (29/29)                          | (29/29)                            |
| A2AP    | 0.28 $\pm$                    | 0.66    | (28/29)                          | (28/29)                            | 0.94 $\pm$                    | 1.89    | (26/29)                          | (25/29)                            |
| A2MG    | 13.54 $\pm$                   | 26.36   | (29/29)                          | (24/29)                            | 53.40 $\pm$                   | 53.61   | (29/29)                          | (29/29)                            |
| AACT    | 0.70 $\pm$                    | 1.74    | (26/29)                          | (26/29)                            | 4.28 $\pm$                    | 6.08    | (28/29)                          | (28/29)                            |
| ADIPO   | 0.01 $\pm$                    | 0.02    | (9/29)                           | (3/29)                             | 0.02 $\pm$                    | 0.02    | (14/29)                          | (7/29)                             |
| AFAM    | 0.63 $\pm$                    | 0.86    | (26/29)                          | (13/29)                            | 1.42 $\pm$                    | 1.48    | (29/29)                          | (24/29)                            |
| ALBU    | 1278.96 $\pm$                 | 1718.91 | (29/29)                          | (29/29)                            | 3607.52 $\pm$                 | 2633.84 | (29/29)                          | (29/29)                            |
| ANGT    | 0.94 $\pm$                    | 1.43    | (20/29)                          | (20/29)                            | 3.10 $\pm$                    | 2.93    | (29/29)                          | (29/29)                            |
| ANT3    | 0.14 $\pm$                    | 0.30    | (14/29)                          | (3/29)                             | 0.61 $\pm$                    | 0.79    | (25/29)                          | (10/29)                            |
| ANXA5   | 0.31 $\pm$                    | 0.46    | (25/29)                          | (25/29)                            | 1.05 $\pm$                    | 2.21    | (25/29)                          | (25/29)                            |
| APOA1   | 15.59 $\pm$                   | 48.16   | (28/29)                          | (28/29)                            | 60.50 $\pm$                   | 104.58  | (29/29)                          | (29/29)                            |

|                |         |      |         |         |         |       |         |         |
|----------------|---------|------|---------|---------|---------|-------|---------|---------|
| APOA2          | 2.20 ±  | 4.63 | (23/29) | (17/29) | 7.96 ±  | 10.41 | (28/29) | (26/29) |
| APOA4          | 0.12 ±  | 0.48 | (6/29)  | (6/29)  | 0.88 ±  | 3.44  | (17/29) | (14/29) |
| APOB           | 0.03 ±  | 0.06 | (23/29) | (17/29) | 0.20 ±  | 0.39  | (29/29) | (29/29) |
| APOC1          | 0.12 ±  | 0.25 | (18/29) | (18/29) | 0.35 ±  | 0.43  | (25/29) | (25/29) |
| APOC3          | 0.07 ±  | 0.17 | (18/29) | (7/29)  | 0.23 ±  | 0.43  | (21/29) | (13/29) |
| APOD           | 0.01 ±  | 0.02 | (3/29)  | (0/29)  | 0.16 ±  | 0.36  | (11/29) | (9/29)  |
| APOE           | 0.07 ±  | 0.10 | (28/29) | (20/29) | 0.25 ±  | 0.44  | (29/29) | (22/29) |
| APOH           | 3.28 ±  | 3.24 | (29/29) | (29/29) | 10.53 ± | 9.02  | (29/29) | (29/29) |
| APOL1          | 0.19 ±  | 0.27 | (10/29) | (1/29)  | 0.59 ±  | 0.89  | (19/29) | (4/29)  |
| C1 inactivator | 0.25 ±  | 0.43 | (29/29) | (17/29) | 2.05 ±  | 2.32  | (29/29) | (28/29) |
| CERU           | 0.98 ±  | 1.02 | (22/29) | (22/29) | 5.36 ±  | 5.19  | (28/29) | (28/29) |
| CFAH           | 0.35 ±  | 0.49 | (28/29) | (28/29) | 2.61 ±  | 2.74  | (29/29) | (29/29) |
| CFB            | 0.49 ±  | 0.52 | (21/29) | (21/29) | 3.04 ±  | 2.55  | (29/29) | (29/29) |
| CLUS           | 10.39 ± | 8.15 | (29/29) | (29/29) | 16.03 ± | 11.52 | (29/29) | (29/29) |
| CO3            | 7.67 ±  | 8.25 | (25/29) | (25/29) | 29.46 ± | 23.00 | (29/29) | (29/29) |
| CO9            | 0.14 ±  | 0.22 | (1/29)  | (1/29)  | 0.74 ±  | 1.37  | (3/29)  | (3/29)  |
| CRP            | 0.03 ±  | 0.05 | (12/29) | (1/29)  | 0.57 ±  | 1.38  | (21/29) | (9/29)  |

|        |         |       |         |         |          |        |         |         |
|--------|---------|-------|---------|---------|----------|--------|---------|---------|
| FA12   | 0.10 ±  | 0.17  | (28/29) | (19/29) | 0.38 ±   | 0.51   | (29/29) | (27/29) |
| FETUA  | 1.02 ±  | 1.65  | (18/29) | (18/29) | 5.29 ±   | 4.68   | (29/29) | (29/29) |
| FIBA   | 1.51 ±  | 4.66  | (18/29) | (12/29) | 8.08 ±   | 21.36  | (25/29) | (23/29) |
| FIBB   | 4.36 ±  | 5.94  | (27/29) | (17/29) | 25.85 ±  | 24.82  | (29/29) | (28/29) |
| FIBG   | 0.01 ±  | 0.03  | (15/29) | (5/29)  | 0.00 ±   | 0.00   | (10/29) | (1/29)  |
| FINC   | 0.35 ±  | 0.65  | (16/29) | (16/29) | 3.51 ±   | 3.80   | (26/29) | (26/29) |
| FPA    | 1.22 ±  | 2.62  | (18/29) | (4/29)  | 3.92 ±   | 8.31   | (20/29) | (9/29)  |
| GELS   | 16.46 ± | 17.97 | (29/29) | (29/29) | 19.96 ±  | 11.79  | (29/29) | (29/29) |
| HEMO   | 16.45 ± | 21.13 | (29/29) | (27/29) | 68.37 ±  | 52.93  | (29/29) | (29/29) |
| HEP2   | 0.21 ±  | 0.43  | (29/29) | (27/29) | 1.39 ±   | 1.84   | (29/29) | (29/29) |
| HPT    | 63.81 ± | 70.99 | (29/29) | (29/29) | 275.62 ± | 292.19 | (29/29) | (29/29) |
| HRG    | 0.93 ±  | 0.87  | (29/29) | (29/29) | 3.76 ±   | 2.51   | (29/29) | (29/29) |
| ITIH1  | 0.65 ±  | 1.03  | (27/29) | (27/29) | 2.87 ±   | 3.76   | (29/29) | (29/29) |
| KNG1   | 2.91 ±  | 4.59  | (29/29) | (22/29) | 9.14 ±   | 8.53   | (29/29) | (29/29) |
| PLMN   | 0.05 ±  | 0.09  | (16/29) | (16/29) | 0.19 ±   | 0.22   | (27/29) | (27/29) |
| Q9UJ43 | 0.15 ±  | 0.27  | (11/29) | (11/29) | 0.29 ±   | 0.32   | (21/29) | (20/29) |
| RBP    | 2.91 ±  | 2.91  | (29/29) | (22/29) | 11.22 ±  | 11.07  | (29/29) | (29/29) |

|      |         |       |         |         |         |       |         |         |
|------|---------|-------|---------|---------|---------|-------|---------|---------|
| SAA4 | 0.40 ±  | 0.79  | (9/29)  | (9/29)  | 1.65 ±  | 2.34  | (23/29) | (23/29) |
| SAMP | 0.07 ±  | 0.06  | (23/29) | (1/29)  | 0.52 ±  | 0.65  | (28/29) | (18/29) |
| THRB | 0.02 ±  | 0.02  | (2/29)  | (0/29)  | 0.06 ±  | 0.11  | (9/29)  | (0/29)  |
| TRFE | 19.62 ± | 24.18 | (22/29) | (22/29) | 67.47 ± | 56.48 | (28/29) | (28/29) |
| TSP1 | 1.05 ±  | 1.04  | (29/29) | (26/29) | 2.13 ±  | 2.03  | (29/29) | (28/29) |
| TTHY | 13.34 ± | 12.29 | (29/29) | (29/29) | 44.52 ± | 37.26 | (29/29) | (29/29) |
| VTDB | 4.72 ±  | 4.07  | (29/29) | (29/29) | 14.15 ± | 8.81  | (29/29) | (29/29) |
| VTNC | 0.83 ±  | 1.19  | (24/29) | (13/29) | 6.25 ±  | 6.66  | (29/29) | (25/29) |
| ZA2G | 56.23 ± | 56.97 | (29/29) | (19/29) | 73.80 ± | 58.00 | (29/29) | (26/29) |

---

(D)

| Protein        | Control (n=29)        |           | OSCC (n=29)           |           |
|----------------|-----------------------|-----------|-----------------------|-----------|
|                | Concentration (ng/mL) |           | Concentration (ng/mL) |           |
| A1AG1          | 12.77 ±               | 17.88     | 27.79 ±               | 28.71     |
| A1AT           | 221.08 ±              | 728.48    | 3156.15 ±             | 6703.26   |
| A1BG           | 323.71 ±              | 341.75    | 1903.15 ±             | 2727.02   |
| A2AP           | 16.12 ±               | 42.44     | 71.89 ±               | 158.49    |
| A2MG           | 2093.66 ±             | 4261.13   | 15351.89 ±            | 23272.10  |
| AACT           | 32.71 ±               | 92.25     | 334.98 ±              | 553.38    |
| ADIPO          | 0.32 ±                | 0.50      | 0.81 ±                | 1.38      |
| AFAM           | 44.13 ±               | 70.68     | 154.07 ±              | 275.69    |
| ALBU           | 81472.10 ±            | 128570.97 | 394896.34 ±           | 490580.28 |
| ANGT           | 47.75 ±               | 78.72     | 286.96 ±              | 364.28    |
| ANT3           | 7.20 ±                | 17.74     | 46.57 ±               | 61.00     |
| ANXA5          | 9.69 ±                | 16.06     | 30.03 ±               | 51.93     |
| APOA1          | 535.79 ±              | 1760.90   | 2738.90 ±             | 5213.57   |
| APOA2          | 27.47 ±               | 60.69     | 127.92 ±              | 191.44    |
| APOA4          | 6.08 ±                | 25.68     | 61.83 ±               | 253.84    |
| APOB           | 18.77 ±               | 39.63     | 156.75 ±              | 341.97    |
| APOC1          | 1.04 ±                | 2.74      | 4.45 ±                | 7.00      |
| APOC3          | 0.79 ±                | 2.06      | 3.33 ±                | 7.20      |
| APOD           | 0.10 ±                | 0.34      | 4.93 ±                | 9.13      |
| APOE           | 2.60 ±                | 4.45      | 13.49 ±               | 26.65     |
| APOH           | 125.66 ±              | 139.61    | 657.06 ±              | 823.55    |
| APOL1          | 8.36 ±                | 13.90     | 36.69 ±               | 62.16     |
| C1 inactivator | 13.42 ±               | 26.90     | 170.32 ±              | 222.07    |
| CERU           | 101.61 ±              | 110.36    | 1006.69 ±             | 1369.40   |

|        |           |         |            |          |
|--------|-----------|---------|------------|----------|
| CFAH   | 48.33 ±   | 79.92   | 583.22 ±   | 929.87   |
| CFB    | 37.95 ±   | 45.36   | 401.41 ±   | 521.77   |
| CLUS   | 568.37 ±  | 679.94  | 1404.48 ±  | 1571.42  |
| CO3    | 1285.63 ± | 1516.91 | 8592.00 ±  | 10172.38 |
| CO9    | 9.07 ±    | 16.62   | 79.75 ±    | 161.98   |
| CRP    | 0.82 ±    | 1.33    | 29.38 ±    | 88.54    |
| FA12   | 6.74 ±    | 13.52   | 39.83 ±    | 66.26    |
| FETUA  | 34.99 ±   | 61.55   | 325.51 ±   | 396.95   |
| FIBA   | 158.56 ±  | 449.27  | 1037.45 ±  | 3313.15  |
| FIBB   | 227.15 ±  | 328.76  | 2362.68 ±  | 3231.79  |
| FIBG   | 0.63 ±    | 1.45    | 0.12 ±     | 0.25     |
| FINC   | 87.54 ±   | 194.01  | 1405.61 ±  | 2136.01  |
| FPA    | 138.85 ±  | 332.53  | 471.85 ±   | 1078.67  |
| GELS   | 1208.96 ± | 1372.87 | 2825.18 ±  | 3415.41  |
| HEMO   | 802.10 ±  | 1132.76 | 5643.09 ±  | 6898.71  |
| HEP2   | 12.52 ±   | 29.60   | 114.51 ±   | 175.19   |
| HPT    | 3047.84 ± | 5204.47 | 21413.76 ± | 34303.99 |
| HRG    | 52.73 ±   | 61.08   | 334.53 ±   | 349.57   |
| ITIH1  | 67.84 ±   | 126.91  | 479.10 ±   | 844.98   |
| KNG1   | 201.54 ±  | 341.47  | 1087.91 ±  | 1505.63  |
| PLMN   | 4.67 ±    | 9.26    | 27.06 ±    | 36.19    |
| Q9UJ43 | 5.63 ±    | 11.29   | 20.24 ±    | 28.31    |
| RBP    | 63.93 ±   | 72.49   | 461.62 ±   | 731.34   |
| SAA4   | 6.80 ±    | 16.52   | 38.49 ±    | 73.74    |
| SAMP   | 1.44 ±    | 1.22    | 15.15 ±    | 15.10    |
| THRB   | 1.06 ±    | 1.30    | 5.32 ±     | 11.87    |
| TRFE   | 1335.62 ± | 1845.56 | 8511.40 ±  | 11693.74 |
| TSP1   | 160.25 ±  | 226.96  | 458.54 ±   | 663.56   |

|      |           |         |           |         |
|------|-----------|---------|-----------|---------|
| TTHY | 204.05 ±  | 227.45  | 1173.08 ± | 1572.67 |
| VTDB | 238.16 ±  | 237.40  | 1181.79 ± | 1419.26 |
| VTNC | 45.54 ±   | 75.54   | 546.36 ±  | 861.29  |
| ZA2G | 1552.52 ± | 1561.56 | 3614.73 ± | 4405.75 |

---



(E)

| Protein | Control (n=58)                |         |                                  |                                    | OSCC (n=61)                   |         |                                  |                                    |
|---------|-------------------------------|---------|----------------------------------|------------------------------------|-------------------------------|---------|----------------------------------|------------------------------------|
|         | Concentration (fmol/ $\mu$ g) |         | Detectable case No. <sup>a</sup> | Quantifiable case No. <sup>b</sup> | Concentration (fmol/ $\mu$ g) |         | Detectable case No. <sup>a</sup> | Quantifiable case No. <sup>b</sup> |
| A1AG1   | 0.96 $\pm$                    | 1.17    | (1/58)                           | (1/58)                             | 1.59 $\pm$                    | 1.84    | (2/61)                           | (2/61)                             |
| A1AT    | 8.75 $\pm$                    | 28.59   | (47/58)                          | (47/58)                            | 35.39 $\pm$                   | 68.05   | (61/61)                          | (61/61)                            |
| A1BG    | 7.47 $\pm$                    | 6.60    | (58/58)                          | (58/58)                            | 21.82 $\pm$                   | 19.99   | (61/61)                          | (61/61)                            |
| A2AP    | 0.24 $\pm$                    | 0.51    | (56/58)                          | (56/58)                            | 0.72 $\pm$                    | 1.38    | (56/61)                          | (53/61)                            |
| A2MG    | 23.55 $\pm$                   | 30.75   | (58/58)                          | (53/58)                            | 58.47 $\pm$                   | 54.46   | (61/61)                          | (61/61)                            |
| AACT    | 0.96 $\pm$                    | 2.32    | (53/58)                          | (53/58)                            | 3.54 $\pm$                    | 5.19    | (60/61)                          | (60/61)                            |
| ADIPO   | 0.01 $\pm$                    | 0.02    | (17/58)                          | (5/58)                             | 0.02 $\pm$                    | 0.03    | (36/61)                          | (23/61)                            |
| AFAM    | 0.61 $\pm$                    | 0.77    | (55/58)                          | (26/58)                            | 1.63 $\pm$                    | 1.39    | (61/61)                          | (52/61)                            |
| ALBU    | 1656.68 $\pm$                 | 1772.69 | (58/58)                          | (58/58)                            | 4178.24 $\pm$                 | 2692.20 | (61/61)                          | (61/61)                            |
| ANGT    | 0.92 $\pm$                    | 1.20    | (46/58)                          | (46/58)                            | 2.77 $\pm$                    | 2.28    | (61/61)                          | (61/61)                            |
| ANT3    | 0.20 $\pm$                    | 0.34    | (38/58)                          | (4/58)                             | 0.81 $\pm$                    | 1.16    | (57/61)                          | (24/61)                            |
| ANXA5   | 0.25 $\pm$                    | 0.35    | (52/58)                          | (52/58)                            | 0.84 $\pm$                    | 1.63    | (55/61)                          | (55/61)                            |
| APOA1   | 12.03 $\pm$                   | 37.29   | (56/58)                          | (56/58)                            | 40.74 $\pm$                   | 80.76   | (61/61)                          | (61/61)                            |

|                |         |      |         |         |         |       |         |         |
|----------------|---------|------|---------|---------|---------|-------|---------|---------|
| APOA2          | 1.96 ±  | 3.97 | (49/58) | (40/58) | 6.86 ±  | 8.76  | (57/61) | (54/61) |
| APOA4          | 0.15 ±  | 0.63 | (17/58) | (13/58) | 0.58 ±  | 2.40  | (34/61) | (29/61) |
| APOB           | 0.03 ±  | 0.06 | (50/58) | (41/58) | 0.16 ±  | 0.29  | (61/61) | (60/61) |
| APOC1          | 0.12 ±  | 0.21 | (39/58) | (39/58) | 0.28 ±  | 0.37  | (55/61) | (55/61) |
| APOC3          | 0.10 ±  | 0.20 | (45/58) | (19/58) | 0.23 ±  | 0.43  | (48/61) | (31/61) |
| APOD           | 0.19 ±  | 0.45 | (21/58) | (13/58) | 0.51 ±  | 0.72  | (35/61) | (30/61) |
| APOE           | 0.06 ±  | 0.10 | (57/58) | (40/58) | 0.17 ±  | 0.33  | (61/61) | (47/61) |
| APOH           | 3.03 ±  | 2.88 | (58/58) | (58/58) | 10.77 ± | 7.95  | (61/61) | (61/61) |
| APOL1          | 0.20 ±  | 0.24 | (23/58) | (2/58)  | 0.51 ±  | 0.71  | (42/61) | (9/61)  |
| C1 inactivator | 0.30 ±  | 0.48 | (58/58) | (42/58) | 1.50 ±  | 1.80  | (61/61) | (59/61) |
| CERU           | 1.24 ±  | 1.17 | (46/58) | (46/58) | 5.04 ±  | 4.41  | (60/61) | (60/61) |
| CFAH           | 0.34 ±  | 0.38 | (57/58) | (56/58) | 2.62 ±  | 2.34  | (61/61) | (61/61) |
| CFB            | 0.60 ±  | 0.57 | (46/58) | (46/58) | 2.61 ±  | 2.28  | (61/61) | (61/61) |
| CLUS           | 11.26 ± | 7.92 | (58/58) | (58/58) | 16.28 ± | 12.07 | (61/61) | (61/61) |
| CO3            | 8.48 ±  | 7.54 | (52/58) | (52/58) | 24.75 ± | 18.59 | (61/61) | (61/61) |
| CO9            | 0.16 ±  | 0.19 | (1/58)  | (1/58)  | 0.60 ±  | 1.06  | (7/61)  | (7/61)  |
| CRP            | 0.03 ±  | 0.04 | (21/58) | (1/58)  | 0.37 ±  | 0.99  | (44/61) | (14/61) |

|        |          |        |         |         |          |        |         |         |
|--------|----------|--------|---------|---------|----------|--------|---------|---------|
| FA12   | 0.08 ±   | 0.13   | (56/58) | (37/58) | 0.33 ±   | 0.41   | (61/61) | (57/61) |
| FETUA  | 0.98 ±   | 1.32   | (43/58) | (43/58) | 4.80 ±   | 4.16   | (59/61) | (59/61) |
| FIBA   | 0.91 ±   | 3.36   | (36/58) | (26/58) | 5.21 ±   | 15.27  | (50/61) | (46/61) |
| FIBB   | 4.73 ±   | 5.24   | (56/58) | (39/58) | 23.93 ±  | 21.67  | (61/61) | (58/61) |
| FIBG   | 0.01 ±   | 0.02   | (28/58) | (7/58)  | 0.01 ±   | 0.02   | (38/61) | (12/61) |
| FINC   | 0.42 ±   | 0.66   | (37/58) | (37/58) | 2.90 ±   | 3.18   | (55/61) | (54/61) |
| FPA    | 0.80 ±   | 1.90   | (42/58) | (4/58)  | 2.10 ±   | 6.00   | (33/61) | (10/61) |
| GELS   | 19.88 ±  | 20.07  | (58/58) | (58/58) | 19.32 ±  | 10.59  | (61/61) | (61/61) |
| HEMO   | 22.99 ±  | 28.51  | (58/58) | (56/58) | 80.87 ±  | 56.67  | (61/61) | (61/61) |
| HEP2   | 0.18 ±   | 0.33   | (57/58) | (55/58) | 1.08 ±   | 1.41   | (61/61) | (61/61) |
| HPT    | 138.03 ± | 187.73 | (58/58) | (58/58) | 473.30 ± | 467.17 | (61/61) | (61/61) |
| HRG    | 1.23 ±   | 1.25   | (58/58) | (58/58) | 4.63 ±   | 4.33   | (61/61) | (61/61) |
| ITIH1  | 0.57 ±   | 0.82   | (56/58) | (56/58) | 2.37 ±   | 2.91   | (61/61) | (61/61) |
| KNG1   | 2.92 ±   | 3.76   | (58/58) | (48/58) | 9.19 ±   | 7.14   | (61/61) | (61/61) |
| PLMN   | 0.05 ±   | 0.08   | (37/58) | (37/58) | 0.17 ±   | 0.18   | (58/61) | (58/61) |
| Q9UJ43 | 0.13 ±   | 0.22   | (23/58) | (23/58) | 0.25 ±   | 0.27   | (45/61) | (43/61) |
| RBP    | 6.31 ±   | 7.11   | (58/58) | (51/58) | 16.21 ±  | 15.02  | (61/61) | (61/61) |

|      |          |        |         |         |          |        |         |         |
|------|----------|--------|---------|---------|----------|--------|---------|---------|
| SAA4 | 0.98 ±   | 2.32   | (29/58) | (29/58) | 3.58 ±   | 5.85   | (48/61) | (48/61) |
| SAMP | 0.10 ±   | 0.14   | (50/58) | (7/58)  | 0.63 ±   | 0.74   | (60/61) | (44/61) |
| THRB | 0.01 ±   | 0.01   | (3/58)  | (0/58)  | 0.04 ±   | 0.08   | (15/61) | (0/61)  |
| TRFE | 21.30 ±  | 22.55  | (48/58) | (48/58) | 59.22 ±  | 44.87  | (60/61) | (60/61) |
| TSP1 | 1.40 ±   | 1.51   | (58/58) | (55/58) | 2.26 ±   | 2.36   | (60/61) | (59/61) |
| TTHY | 33.78 ±  | 38.89  | (58/58) | (58/58) | 72.12 ±  | 66.05  | (61/61) | (61/61) |
| VTDB | 4.86 ±   | 3.71   | (58/58) | (58/58) | 13.99 ±  | 8.54   | (61/61) | (61/61) |
| VTNC | 0.96 ±   | 1.53   | (41/58) | (27/58) | 4.63 ±   | 5.03   | (61/61) | (56/61) |
| ZA2G | 217.00 ± | 260.84 | (58/58) | (48/58) | 170.11 ± | 146.25 | (61/61) | (58/61) |

---

(F)

| Protein        | Control (n=58)        |           | OSCC (n=61)           |           |
|----------------|-----------------------|-----------|-----------------------|-----------|
|                | Concentration (ng/mL) |           | Concentration (ng/mL) |           |
| A1AG1          | 23.03 ±               | 30.74     | 55.73 ±               | 77.35     |
| A1AT           | 382.08 ±              | 1207.91   | 2423.01 ±             | 5284.79   |
| A1BG           | 402.43 ±              | 374.89    | 1803.56 ±             | 2356.87   |
| A2AP           | 13.84 ±               | 31.70     | 56.87 ±               | 119.89    |
| A2MG           | 3910.20 ±             | 5455.30   | 14993.29 ±            | 19939.39  |
| AACT           | 46.51 ±               | 111.25    | 251.14 ±              | 442.91    |
| ADIPO          | 0.30 ±                | 0.50      | 1.15 ±                | 2.00      |
| AFAM           | 43.00 ±               | 63.30     | 169.32 ±              | 225.44    |
| ALBU           | 112556.62 ±           | 139461.33 | 441583.36 ±           | 457707.28 |
| ANGT           | 48.30 ±               | 66.34     | 243.03 ±              | 284.60    |
| ANT3           | 10.63 ±               | 18.04     | 66.75 ±               | 127.95    |
| ANXA5          | 8.20 ±                | 12.30     | 30.19 ±               | 45.47     |
| APOA1          | 393.39 ±              | 1310.33   | 1972.72 ±             | 4270.35   |
| APOA2          | 23.61 ±               | 48.88     | 112.96 ±              | 177.26    |
| APOA4          | 6.67 ±                | 27.91     | 40.48 ±               | 177.28    |
| APOB           | 16.79 ±               | 34.39     | 125.98 ±              | 252.98    |
| APOC1          | 1.09 ±                | 2.22      | 3.86 ±                | 6.09      |
| APOC3          | 1.13 ±                | 2.15      | 3.60 ±                | 7.62      |
| APOD           | 3.77 ±                | 9.09      | 18.15 ±               | 31.27     |
| APOE           | 2.47 ±                | 4.03      | 9.47 ±                | 20.45     |
| APOH           | 119.35 ±              | 123.59    | 628.23 ±              | 681.55    |
| APOL1          | 9.09 ±                | 11.81     | 32.90 ±               | 53.86     |
| C1 inactivator | 16.53 ±               | 26.95     | 120.23 ±              | 168.84    |

|        |           |         |            |          |
|--------|-----------|---------|------------|----------|
| CERU   | 139.29 ±  | 139.85  | 924.68 ±   | 1146.62  |
| CFAH   | 51.37 ±   | 75.28   | 565.39 ±   | 768.37   |
| CFB    | 50.62 ±   | 56.78   | 340.67 ±   | 429.09   |
| CLUS   | 657.87 ±  | 710.96  | 1342.80 ±  | 1379.87  |
| CO3    | 1531.55 ± | 1535.86 | 7188.64 ±  | 7969.05  |
| CO9    | 10.42 ±   | 14.09   | 59.54 ±    | 121.30   |
| CRP    | 0.78 ±    | 1.16    | 17.32 ±    | 62.11    |
| FA12   | 5.45 ±    | 10.02   | 35.34 ±    | 56.66    |
| FETUA  | 40.13 ±   | 61.93   | 299.15 ±   | 370.60   |
| FIBA   | 96.19 ±   | 324.46  | 679.58 ±   | 2360.06  |
| FIBB   | 271.09 ±  | 339.35  | 2147.44 ±  | 2702.80  |
| FIBG   | 0.41 ±    | 1.12    | 0.77 ±     | 2.52     |
| FINC   | 101.67 ±  | 172.90  | 1169.04 ±  | 1807.32  |
| FPA    | 89.63 ±   | 239.98  | 256.58 ±   | 772.60   |
| GELS   | 1731.12 ± | 2150.54 | 2712.18 ±  | 3070.35  |
| HEMO   | 1186.39 ± | 1548.09 | 6361.68 ±  | 6792.82  |
| HEP2   | 10.60 ±   | 21.88   | 91.45 ±    | 138.77   |
| HPT    | 6211.79 ± | 8056.01 | 34774.55 ± | 43027.34 |
| HRG    | 74.06 ±   | 92.41   | 398.36 ±   | 514.63   |
| ITIH1  | 58.79 ±   | 96.74   | 381.44 ±   | 646.21   |
| KNG1   | 209.84 ±  | 292.61  | 1048.61 ±  | 1249.90  |
| PLMN   | 4.71 ±    | 7.63    | 23.76 ±    | 30.87    |
| Q9UJ43 | 5.36 ±    | 10.93   | 16.68 ±    | 22.37    |
| RBP    | 149.04 ±  | 193.50  | 608.04 ±   | 846.12   |
| SAA4   | 14.46 ±   | 31.18   | 85.68 ±    | 171.17   |
| SAMP   | 2.35 ±    | 2.73    | 19.19 ±    | 18.79    |
| THRB   | 0.90 ±    | 1.08    | 3.82 ±     | 8.60     |

---

|      |           |          |           |         |
|------|-----------|----------|-----------|---------|
| TRFE | 1621.78 ± | 2013.46  | 7297.56 ± | 9100.08 |
| TSP1 | 240.83 ±  | 418.01   | 458.36 ±  | 647.83  |
| TTHY | 566.24 ±  | 783.77   | 1819.35 ± | 2212.13 |
| VTDB | 252.48 ±  | 226.47   | 1138.24 ± | 1253.76 |
| VTNC | 50.46 ±   | 106.88   | 392.89 ±  | 631.27  |
| ZA2G | 7927.88 ± | 11941.30 | 7597.46 ± | 7169.05 |

---

**Supplemental Table S6.** The results of differentiation of OSCC from control using cut-off concentrations defined by Youden's index and outlier analysis.

| Protein | Control vs. OSCC (n=58 vs. 61) |         |           |                                               |             |             |                                               |             |             |
|---------|--------------------------------|---------|-----------|-----------------------------------------------|-------------|-------------|-----------------------------------------------|-------------|-------------|
|         | fold-change                    | p-value | AUC value | Youden's index                                |             |             | Outlier analysis                              |             |             |
|         |                                |         |           | Cut-off concentration <sup>a</sup><br>(ng/mL) | sensitivity | specificity | Cut-off concentration <sup>b</sup><br>(ng/mL) | sensitivity | specificity |
| A1AG1   | 2.42                           | 0.001   | 0.67      | 32.31                                         | 0.49        | 0.84        | 127.01                                        | 0.11        | 0.97        |
| A1AT    | 6.34                           | <0.001  | 0.87      | 213.04                                        | 0.87        | 0.79        | 4253.80                                       | 0.11        | 0.98        |
| A1BG    | 4.48                           | <0.001  | 0.82      | 532.38                                        | 0.75        | 0.78        | 1572.46                                       | 0.36        | 1.00        |
| A2AP    | 4.11                           | 0.001   | 0.68      | 12.33                                         | 0.67        | 0.78        | 121.55                                        | 0.11        | 0.98        |
| A2MG    | 3.83                           | <0.001  | 0.77      | 2912.78                                       | 0.79        | 0.67        | 21358.74                                      | 0.20        | 0.98        |
| AACT    | 5.4                            | <0.001  | 0.75      | 29.44                                         | 0.64        | 0.76        | 403.83                                        | 0.20        | 0.97        |
| ADIPO   | 3.79                           | <0.001  | 0.7       | 0.30                                          | 0.64        | 0.78        | 1.89                                          | 0.16        | 0.97        |
| AFAM    | 3.94                           | <0.001  | 0.81      | 26.89                                         | 0.85        | 0.71        | 242.29                                        | 0.23        | 0.97        |
| ALBU    | 3.92                           | <0.001  | 0.81      | 176368.09                                     | 0.69        | 0.79        | 540561.26                                     | 0.26        | 0.97        |
| ANGT    | 5.03                           | <0.001  | 0.82      | 82.41                                         | 0.67        | 0.83        | 258.62                                        | 0.25        | 0.97        |
| ANT3    | 6.28                           | <0.001  | 0.78      | 12.64                                         | 0.67        | 0.78        | 65.65                                         | 0.25        | 0.97        |
| ANXA5   | 3.68                           | <0.001  | 0.7       | 13.15                                         | 0.57        | 0.86        | 49.07                                         | 0.15        | 0.97        |
| APOA1   | 5.01                           | <0.001  | 0.73      | 301.46                                        | 0.62        | 0.84        | 4902.41                                       | 0.15        | 0.98        |



|                   |       |        |      |         |      |      |         |      |      |
|-------------------|-------|--------|------|---------|------|------|---------|------|------|
| APOA2             | 4.79  | <0.001 | 0.77 | 33.02   | 0.62 | 0.86 | 183.78  | 0.16 | 0.98 |
| APOA4             | 6.07  | 0.001  | 0.67 | 0.18    | 0.67 | 0.66 | 101.80  | 0.08 | 0.97 |
| APOB              | 7.5   | <0.001 | 0.79 | 14.04   | 0.74 | 0.78 | 128.33  | 0.26 | 0.98 |
| APOC1             | 3.52  | <0.001 | 0.69 | 1.30    | 0.56 | 0.79 | 8.11    | 0.15 | 0.98 |
| APOC3             | 3.19  | 0.081  | 0.59 | 1.10    | 0.41 | 0.79 | 7.42    | 0.13 | 0.97 |
| APOD              | 4.82  | 0.002  | 0.65 | 16.62   | 0.36 | 0.95 | 31.57   | 0.16 | 0.98 |
| APOE              | 3.83  | 0.001  | 0.67 | 1.98    | 0.61 | 0.72 | 14.81   | 0.15 | 0.97 |
| APOH              | 5.26  | <0.001 | 0.86 | 178.93  | 0.80 | 0.84 | 510.08  | 0.43 | 0.97 |
| APOL1             | 3.62  | <0.001 | 0.71 | 8.26    | 0.69 | 0.71 | 47.45   | 0.18 | 0.98 |
| C1<br>inactivator | 7.27  | <0.001 | 0.83 | 36.73   | 0.64 | 0.91 | 120.35  | 0.28 | 0.97 |
| CERU              | 6.64  | <0.001 | 0.85 | 310.05  | 0.70 | 0.90 | 604.74  | 0.51 | 1.00 |
| CFAH              | 11.01 | <0.001 | 0.91 | 69.70   | 0.87 | 0.84 | 298.16  | 0.52 | 0.97 |
| CFB               | 6.73  | <0.001 | 0.85 | 93.75   | 0.75 | 0.83 | 230.10  | 0.43 | 0.98 |
| CLUS              | 2.04  | 0.001  | 0.67 | 629.56  | 0.64 | 0.72 | 2806.87 | 0.13 | 0.97 |
| CO3               | 4.69  | <0.001 | 0.81 | 5967.30 | 0.39 | 1.00 | 6441.80 | 0.36 | 1.00 |
| CO9               | 5.71  | <0.001 | 0.7  | 14.64   | 0.57 | 0.79 | 56.06   | 0.25 | 0.98 |
| CRP               | 22.19 | <0.001 | 0.77 | 2.21    | 0.54 | 0.93 | 4.44    | 0.31 | 0.95 |
| FA12              | 6.49  | <0.001 | 0.83 | 6.24    | 0.79 | 0.74 | 37.06   | 0.25 | 0.98 |
| FETUA             | 7.45  | <0.001 | 0.85 | 86.51   | 0.70 | 0.90 | 239.78  | 0.41 | 0.95 |

---

|        |      |        |      |         |      |      |          |      |      |
|--------|------|--------|------|---------|------|------|----------|------|------|
| FIBA   | 7.06 | <0.001 | 0.74 | 14.17   | 0.75 | 0.71 | 1146.06  | 0.11 | 0.98 |
| FIBB   | 7.92 | <0.001 | 0.83 | 522.82  | 0.72 | 0.81 | 1325.80  | 0.49 | 1.00 |
| FIBG   | 1.88 | 0.032  | 0.61 | 0.11    | 0.46 | 0.83 | 3.91     | 0.03 | 0.97 |
| FINC   | 11.5 | <0.001 | 0.84 | 137.81  | 0.79 | 0.81 | 668.13   | 0.48 | 0.98 |
| FPA    | 2.86 | 0.803  | 0.49 | 148.17  | 0.20 | 0.93 | 870.70   | 0.08 | 0.97 |
| GELS   | 1.57 | 0.013  | 0.63 | 589.06  | 0.90 | 0.40 | 8614.31  | 0.07 | 0.98 |
| HEMO   | 5.36 | <0.001 | 0.85 | 1607.47 | 0.75 | 0.81 | 6095.30  | 0.33 | 0.97 |
| HEP2   | 8.63 | <0.001 | 0.9  | 17.46   | 0.80 | 0.91 | 78.15    | 0.31 | 0.98 |
| HPT    | 5.6  | <0.001 | 0.79 | 6798.48 | 0.72 | 0.74 | 31306.97 | 0.36 | 0.98 |
| HRG    | 5.38 | <0.001 | 0.85 | 139.51  | 0.69 | 0.90 | 364.19   | 0.31 | 0.98 |
| ITIH1  | 6.49 | <0.001 | 0.85 | 87.01   | 0.75 | 0.83 | 372.65   | 0.26 | 0.98 |
| KNG1   | 5    | <0.001 | 0.83 | 289.63  | 0.74 | 0.79 | 1168.72  | 0.28 | 0.97 |
| PLMN   | 5.04 | <0.001 | 0.82 | 7.22    | 0.67 | 0.83 | 30.40    | 0.25 | 0.98 |
| Q9UJ43 | 3.11 | <0.001 | 0.71 | 7.42    | 0.56 | 0.84 | 40.55    | 0.13 | 0.97 |
| RBP    | 4.08 | <0.001 | 0.79 | 60.11   | 0.95 | 0.48 | 757.53   | 0.25 | 0.98 |
| SAA4   | 5.92 | <0.001 | 0.76 | 13.03   | 0.64 | 0.79 | 118.95   | 0.21 | 0.97 |
| SAMP   | 8.16 | <0.001 | 0.88 | 5.21    | 0.77 | 0.90 | 11.16    | 0.54 | 0.97 |
| THRB   | 4.24 | <0.001 | 0.71 | 1.22    | 0.61 | 0.78 | 4.20     | 0.23 | 0.98 |
| TRFE   | 4.5  | <0.001 | 0.8  | 2580.88 | 0.70 | 0.84 | 7873.46  | 0.26 | 0.98 |
| TSP1   | 1.9  | 0.004  | 0.65 | 197.52  | 0.61 | 0.74 | 1499.26  | 0.05 | 0.98 |

|      |      |        |      |         |      |      |          |      |      |
|------|------|--------|------|---------|------|------|----------|------|------|
| TTHY | 3.21 | <0.001 | 0.74 | 842.30  | 0.52 | 0.86 | 3248.27  | 0.20 | 0.98 |
| VTDB | 4.51 | <0.001 | 0.87 | 303.68  | 0.82 | 0.78 | 951.37   | 0.38 | 1.00 |
| VTNC | 7.79 | <0.001 | 0.87 | 108.38  | 0.72 | 0.91 | 397.00   | 0.26 | 0.98 |
| ZA2G | 0.96 | 0.102  | 0.59 | 1699.95 | 0.85 | 0.40 | 43538.45 | 0.00 | 0.97 |

<sup>a</sup> : The optimal cutoff point is determined using Youden's index ( $J$ ), calculated as  $J = 1 - (\text{false positive rate} + \text{false negative rate}) = 1 - [(1 - \text{sensitivity}) + (1 - \text{specificity})] = \text{sensitivity} + \text{specificity} - 1$ .

<sup>b</sup> : The outlier-cutoff value is defined using control specimens by outlier analysis based on  $T_n$ -test, and is determined as the closest concentration in the ROC curve for presentation of sensitivity/specificity values. Generally, the specificity at outlier-cutoff point is very high, therefore, the sensitivity is lower than the one of Youden's index.

**Supplemental Table S7.** Multivariate Logistic Regression Analysis

---

|      | Adjusted Odds Ratio | 95% Confidence Interval | P     |
|------|---------------------|-------------------------|-------|
| AFAM | 0.949               | 0.919 ~ 0.980           | 0.002 |
| CFAH | 1.024               | 1.008 ~ 1.041           | 0.003 |
| GELS | 0.998               | 0.997 ~ 0.999           | 0.000 |
| SAMP | 1.444               | 1.095 ~ 1.904           | 0.009 |
| VTDB | 1.012               | 1.005 ~ 1.020           | 0.002 |

---

## Supplemental references

- (1) Boichenko, A. P.; Govorukhina, N.; Klip, H. G.; van der Zee, A. G.; Guzel, C.; Luider, T. M.; Bischoff, R. *Journal of proteome research* **2014**, *13*, 4995-5007.
  - (2) Chirwa, N.; Govender, D.; Ndimba, B.; Lotz, Z.; Tyler, M.; Panieri, E.; Kahn, D.; Mall, A. S. *Journal of Cancer* **2012**, *3*, 83-92.
  - (3) Semaan, S. M.; Wang, X.; Marshall, A. G.; Sang, Q. X. *Journal of Cancer* **2012**, *3*, 269-284.
  - (4) Liu, Y.; Luo, X.; Hu, H.; Wang, R.; Sun, Y.; Zeng, R.; Chen, H. *PloS one* **2012**, *7*, e51748.
  - (5) Reed, G. L.; Houg, A. K.; Wang, D. *Arteriosclerosis, thrombosis, and vascular biology* **2014**, *34*, 2586-2593.
  - (6) Chen, Y. T.; Chen, H. W.; Domanski, D.; Smith, D. S.; Liang, K. H.; Wu, C. C.; Chen, C. L.; Chung, T.; Chen, M. C.; Chang, Y. S.; Parker, C. E.; Borchers, C. H.; Yu, J. S. *J. Proteomics* **2012**, *75*, 3529-3545.
  - (7) Poon, T. C.; Chan, A. T.; Zee, B.; Ho, S. K.; Mok, T. S.; Leung, T. W.; Johnson, P. J. *Oncology* **2001**, *61*, 275-283.
  - (8) Nie, S.; Lo, A.; Wu, J.; Zhu, J.; Tan, Z.; Simeone, D. M.; Anderson, M. A.; Shedden, K. A.; Ruffin, M. T.; Lubman, D. M. *Journal of proteome research* **2014**, *13*, 1873-1884.
  - (9) Nie, S.; Yin, H.; Tan, Z.; Anderson, M. A.; Ruffin, M. T.; Simeone, D. M.; Lubman, D. M. *J. Proteome Res.* **2014**, *13*, 6058-6066.
  - (10) Zeng, F.; Shi, J.; Long, Y.; Tian, H.; Li, X.; Zhao, A. Z.; Li, R. F.; Chen, T. *Cellular physiology and biochemistry : international journal of experimental cellular physiology, biochemistry, and pharmacology* **2015**, *36*, 1670-1678.
  - (11) Seeber, B.; Morandell, E.; Lunger, F.; Wildt, L.; Dieplinger, H. *Reproductive biology and endocrinology : RB&E* **2014**, *12*, 88.
  - (12) Song, H. J.; Xue, Y. L.; Qiu, Z. L.; Luo, Q. Y. *Nuclear medicine communications* **2013**, *34*, 1196-1203.
  - (13) Aktas, B.; Kasimir-Bauer, S.; Wimberger, P.; Kimmig, R.; Heubner, M. *Anticancer research* **2013**, *33*, 329-336.
  - (14) Shibutani, M.; Maeda, K.; Nagahara, H.; Ohtani, H.; Iseki, Y.; Ikeya, T.; Sugano, K.; Hirakawa, K. *BMC cancer* **2015**, *15*, 521.
  - (15) Zhou, T.; Zhan, J.; Hong, S.; Hu, Z.; Fang, W.; Qin, T.; Ma, Y.; Yang, Y.; He, X.; Zhao, Y.; Huang, Y.; Zhao, H.; Zhang, L. *Scientific reports* **2015**, *5*, 10481.
  - (16) Martin, P.; Noonan, S.; Mullen, M. P.; Scaife, C.; Tosetto, M.; Nolan, B.; Wynne, K.; Hyland, J.; Sheahan, K.; Elia, G.; O'Donoghue, D.; Fennelly, D.; O'Sullivan, J. *BMC cancer* **2014**, *14*, 887.
  - (17) Luo, Y.; Ohmori, H.; Shimomoto, T.; Fujii, K.; Sasahira, T.; Chihara, Y.; Kuniyasu, H. *Pathobiology : journal of immunopathology, molecular and cellular biology* **2011**, *78*, 285-290.
  - (18) Iwako, H.; Tashiro, H.; Amano, H.; Tanimoto, Y.; Oshita, A.; Kobayashi, T.; Kuroda, S.; Tazawa, H.; Nambu, J.; Mikuriya, Y.; Abe, T.; Ohdan, H. *Ann. Surg. Oncol.* **2012**, *19*, 2888-2896.
  - (19) Kuusisto, M. E.; Haapasaari, K. M.; Remes, A. M.; Bloigu, R.; Karihtala, P.; Turpeenniemi-Hujanen, T.; Kuittinen, O. *Ann. Hematol.* **2015**, *94*, 1167-1174.
  - (20) Park, N.; Chun, Y. J. *Journal of toxicology and environmental health. Part A* **2014**, *77*, 1467-1476.
  - (21) Wu, L.; Yang, L.; Xiong, Y.; Guo, H.; Shen, X.; Cheng, Z.; Zhang, Y.; Gao, Z.; Zhu, X. *Tumour biology : the journal of the International Society for Oncodevelopmental Biology and Medicine* **2014**, *35*, 12327-12337.
  - (22) Chen, Y. T.; Chen, C. L.; Chen, H. W.; Chung, T.; Wu, C. C.; Chen, C. D.; Hsu, C. W.; Chen, M. C.; Tsui, K. H.; Chang, P. L.; Chang, Y. S.; Yu, J. S. *J. Proteome Res.* **2010**, *9*, 5803-5815.
  - (23) Pal, M. K.; Rashid, M.; Bisht, M. *Biosensors & bioelectronics* **2015**, *73*, 146-152.
  - (24) Soukup, V.; Kalousova, M.; Capoun, O.; Sobotka, R.; Breytl, Z.; Pesl, M.; Zima, T.; Hanus, T. *Urologia*
-

*internationalis* **2015**.

- (25) Huang, Y.; Zhang, X.; Jiang, W.; Wang, Y.; Jin, H.; Liu, X.; Xu, C. *European journal of obstetrics, gynecology, and reproductive biology* **2012**, *165*, 96-103.
- (26) Guo, X.; Hao, Y.; Kamilijiang, M.; Hasimu, A.; Yuan, J.; Wu, G.; Reyimu, H.; Kadeer, N.; Abudula, A. *Tumour biology : the journal of the International Society for Oncodevelopmental Biology and Medicine* **2015**, *36*, 1711-1720.
- (27) Timms, J. F.; Arslan-Low, E.; Kabir, M.; Worthington, J.; Camuzeaux, S.; Sinclair, J.; Szaub, J.; Afrough, B.; Podust, V. N.; Fourkala, E. O.; Cubizolles, M.; Kronenberg, F.; Fung, E. T.; Gentry-Maharaj, A.; Menon, U.; Jacobs, I. *Proteomics. Clinical applications* **2014**, *8*, 982-993.
- (28) Chen, C. L.; Lin, T. S.; Tsai, C. H.; Wu, C. C.; Chung, T.; Chien, K. Y.; Wu, M.; Chang, Y. S.; Yu, J. S.; Chen, Y. T. *Journal of proteomics* **2013**, *85*, 28-43.
- (29) Gong, Y.; Zhang, L.; Bie, P.; Wang, H. *PloS one* **2013**, *8*, e61456.
- (30) Zhang, X.; Zhao, X. W.; Liu, D. B.; Han, C. Z.; Du, L. L.; Jing, J. X.; Wang, Y. *World journal of gastroenterology : WJG* **2014**, *20*, 8646-8652.
- (31) Fukuhara, T.; Wada, M.; Nakamura, S.; Ono, C.; Shiokawa, M.; Yamamoto, S.; Motomura, T.; Okamoto, T.; Okuzaki, D.; Yamamoto, M.; Saito, I.; Wakita, T.; Koike, K.; Matsuura, Y. *PLoS pathogens* **2014**, *10*, e1004534.
- (32) Cohen, M.; Yossef, R.; Erez, T.; Kugel, A.; Welt, M.; Karpasas, M. M.; Bones, J.; Rudd, P. M.; Taieb, J.; Boissin, H.; Harats, D.; Noy, K.; Tekoah, Y.; Lichtenstein, R. G.; Rubin, E.; Porgador, A. *PloS one* **2011**, *6*, e14540.
- (33) Bajo-Graneras, R.; Crespo-Sanjuan, J.; Garcia-Centeno, R. M.; Garrote-Adrados, J. A.; Gutierrez, G.; Garcia-Tejeiro, M.; Aguirre-Gervas, B.; Calvo-Nieves, M. D.; Bustamante, R.; Ganfornina, M. D.; Sanchez, D. *International journal of colorectal disease* **2013**, *28*, 751-766.
- (34) Soiland, H.; Skaland, I.; Varhaug, J. E.; Korner, H.; Janssen, E. A.; Gudlaugsson, E.; Baak, J. P.; Soreide, J. A. *Acta oncologica* **2009**, *48*, 514-521.
- (35) Chung, L.; Moore, K.; Phillips, L.; Boyle, F. M.; Marsh, D. J.; Baxter, R. C. *Breast cancer research : BCR* **2014**, *16*, R63.
- (36) Pietrowska, M.; Jelonek, K.; Michalak, M.; Ros, M.; Rodziewicz, P.; Chmielewska, K.; Polanski, K.; Polanska, J.; Gdowicz-Klosok, A.; Giglok, M.; Suwinski, R.; Tarnawski, R.; Dziadziuszko, R.; Rzyman, W.; Widlak, P. *Acta biochimica Polonica* **2014**, *61*, 325-331.
- (37) Dummer, P. D.; Limou, S.; Rosenberg, A. Z.; Heymann, J.; Nelson, G.; Winkler, C. A.; Kopp, J. B. *Seminars in nephrology* **2015**, *35*, 222-236.
- (38) Limou, S.; Nelson, G. W.; Lecordier, L.; An, P.; O'HUigin, C. S.; David, V. A.; Binns-Roemer, E. A.; Guiblet, W. M.; Oleksyk, T. K.; Pays, E.; Kopp, J. B.; Winkler, C. A. *Kidney international* **2015**.
- (39) Hu, C. A.; Klopfer, E. I.; Ray, P. E. *FEBS letters* **2012**, *586*, 947-955.
- (40) Monnier, N.; Ponard, D.; Duponchel, C.; Csopaki, F.; Bouillet, L.; Tosi, M.; Lunardi, J.; Drouet, C. *Molecular immunology* **2006**, *43*, 2161-2168.
- (41) Caballero, T.; Farkas, H.; Bouillet, L.; Bowen, T.; Gompel, A.; Fagerberg, C.; Bjokander, J.; Bork, K.; Bygum, A.; Cicardi, M.; de Carolis, C.; Frank, M.; Gooi, J. H.; Longhurst, H.; Martinez-Saguer, I.; Nielsen, E. W.; Obtulowitz, K.; Perricone, R.; Prior, N.; Group, C. I. D. W. *The Journal of allergy and clinical immunology* **2012**, *129*, 308-320.
- (42) Diaconu, C.; Pantis, C.; Cirimbei, C.; Bordea, C.; Gruia, M. I.; Blidaru, A. *Journal of medicine and life* **2015**, *8*, 32-36.
- (43) Balmana, M.; Sarrats, A.; Llop, E.; Barrabes, S.; Saldova, R.; Ferri, M. J.; Figueras, J.; Fort, E.; de Llorens, R.; Rudd, P. M.; Peracaula, R. *Clinica chimica acta; international journal of clinical chemistry* **2015**, *442*, 56-62.
-

- (44) Benicky, J.; Sanda, M.; Pompach, P.; Wu, J.; Goldman, R. *Analytical chemistry* **2014**, *86*, 10716-10723.
- (45) Riihila, P. M.; Nissinen, L. M.; Ala-aho, R.; Kallajoki, M.; Grenman, R.; Meri, S.; Peltonen, S.; Peltonen, J.; Kahari, V. M. *The Journal of investigative dermatology* **2014**, *134*, 498-506.
- (46) Wu, J.; Xie, X.; Nie, S.; Buckanovich, R. J.; Lubman, D. M. *Journal of proteome research* **2013**, *12*, 3342-3352.
- (47) Lee, M. J.; Na, K.; Jeong, S. K.; Lim, J. S.; Kim, S. A.; Lee, M. J.; Song, S. Y.; Kim, H.; Hancock, W. S.; Paik, Y. K. *Journal of proteome research* **2014**, *13*, 4878-4888.
- (48) Seriramalu, R.; Pang, W. W.; Jayapalan, J. J.; Mohamed, E.; Abdul-Rahman, P. S.; Bustam, A. Z.; Khoo, A. S.; Hashim, O. H. *Electrophoresis* **2010**, *31*, 2388-2395.
- (49) Xiu, P.; Dong, X. F.; Li, X. P.; Li, J. *World journal of gastroenterology : WJG* **2015**, *21*, 8262-8270.
- (50) Guo, W.; Ma, X.; Xue, C.; Luo, J.; Zhu, X.; Xiang, J.; Lu, B.; Li, H. *Disease markers* **2014**, *2014*, 168960.
- (51) Paulus, Y. M.; Kuo, C. H.; Morohoshi, K.; Nugent, A.; Zheng, L. L.; Nomoto, H.; Blumenkranz, M. S.; Palanker, D.; Ono, S. J. *Ophthalmic surgery, lasers & imaging retina* **2015**, *46*, 362-368.
- (52) Kim, P. Y.; Tan, O.; Diakiw, S. M.; Carter, D.; Sekerye, E. O.; Wasinger, V. C.; Liu, T.; Kavallaris, M.; Norris, M. D.; Haber, M.; Chesler, L.; Dolnikov, A.; Trahair, T. N.; Cheung, N. K.; Marshall, G. M.; Cheung, B. B. *Journal of proteomics* **2014**, *96*, 1-12.
- (53) Narayanasamy, A.; Ahn, J. M.; Sung, H. J.; Kong, D. H.; Ha, K. S.; Lee, S. Y.; Cho, J. Y. *Journal of proteomics* **2011**, *74*, 2948-2958.
- (54) Fan, N. J.; Kang, R.; Ge, X. Y.; Li, M.; Liu, Y.; Chen, H. M.; Gao, C. F. *Diagnostic pathology* **2014**, *9*, 53.
- (55) Linden, M.; Lind, S. B.; Mayrhofer, C.; Segersten, U.; Wester, K.; Lyutvinskiy, Y.; Zubarev, R.; Malmstrom, P. U.; Pettersson, U. *Proteomics* **2012**, *12*, 135-144.
- (56) Tung, C. L.; Lin, S. T.; Chou, H. C.; Chen, Y. W.; Lin, H. C.; Tung, C. L.; Huang, K. J.; Chen, Y. J.; Lee, Y. R.; Chan, H. L. *Journal of pharmaceutical and biomedical analysis* **2013**, *75*, 7-17.
- (57) Zhou, Z.; Qutaish, M.; Han, Z.; Schur, R. M.; Liu, Y.; Wilson, D. L.; Lu, Z. R. *Nature communications* **2015**, *6*, 7984.
- (58) Ebert, M. P.; Niemeyer, D.; Deininger, S. O.; Wex, T.; Knippig, C.; Hoffmann, J.; Sauer, J.; Albrecht, W.; Malfertheiner, P.; Rocken, C. *Journal of proteome research* **2006**, *5*, 2152-2158.
- (59) Xin, Y. N.; Geng, N.; Lin, Z. H.; Cui, Y. Z.; Duan, H. P.; Zhang, M.; Xuan, S. Y. *PloS one* **2014**, *9*, e108132.
- (60) Lokamani, I.; Looi, M. L.; Md Ali, S. A.; Mohd Dali, A. Z.; Ahmad Annuar, M. A.; Jamal, R. *Pathology oncology research : POR* **2014**, *20*, 119-129.
- (61) Pan, T. L.; Wang, P. W.; Al-Suwayeh, S. A.; Huang, Y. J.; Fang, J. Y. *Food and chemical toxicology : an international journal published for the British Industrial Biological Research Association* **2012**, *50*, 3892-3901.
- (62) Kalantari, S.; Rutishauser, D.; Samavat, S.; Nafar, M.; Mahmudieh, L.; Rezaei-Tavirani, M.; Zubarev, R. A. *PloS one* **2013**, *8*, e80830.
- (63) Jessie, K.; Jayapalan, J. J.; Ong, K. C.; Abdul Rahim, Z. H.; Zain, R. M.; Wong, K. T.; Hashim, O. H. *Electrophoresis* **2013**, *34*, 2495-2502.
- (64) Clarke, L. A.; Hemmelgarn, H.; Colobong, K.; Thomas, A.; Stockler, S.; Casey, R.; Chan, A.; Fernoff, P.; Mitchell, J. *Journal of inherited metabolic disease* **2012**, *35*, 355-362.
- (65) Ayyub, A.; Saleem, M.; Musharraf, S. G.; Naz, M.; Tariq, A.; Hashmi, N. *Molecular medicine reports* **2015**, *12*, 3755-3762.
- (66) Matboli, M.; Eissa, S.; Said, H. *Medical oncology* **2014**, *31*, 897.
- (67) Qiu, Y.; Patwa, T. H.; Xu, L.; Shedden, K.; Misek, D. E.; Tuck, M.; Jin, G.; Ruffin, M. T.; Turgeon, D. K.; Synal, S.; Bresalier, R.; Marcon, N.; Brenner, D. E.; Lubman, D. M. *Journal of proteome research* **2008**, *7*, 1693-1703.
- (68) Halder, S.; Dey, R. K.; Chowdhury, A. R.; Bhattacharyya, P.; Chakrabarti, A. *Journal of proteomics* **2015**.
-

- (69) Wang, J.; Wang, X.; Lin, S.; Chen, C.; Wang, C.; Ma, Q.; Jiang, B. *PloS one* **2013**, *8*, e70519.
- (70) Liu, W.; Liu, B.; Cai, Q.; Li, J.; Chen, X.; Zhu, Z. *Clinica chimica acta; international journal of clinical chemistry* **2012**, *413*, 1098-1106.
- (71) Didiasova, M.; Wujak, L.; Wygrecka, M.; Zakrzewicz, D. *International journal of molecular sciences* **2014**, *15*, 21229-21252.
- (72) Liu, W.; Yang, Q.; Liu, B.; Zhu, Z. *Clinica chimica acta; international journal of clinical chemistry* **2014**, *431*, 179-184.
- (73) Choudhary, D.; Hegde, P.; Voznesensky, O.; Choudhary, S.; Kopsiaftis, S.; Claffey, K. P.; Pilbeam, C. C.; Taylor, J. A., 3rd. *Urologic oncology* **2015**, *33*, 387 e317-327.
- (74) Alkharfy, K. M.; Al-Daghri, N. M.; Vanhoutte, P. M.; Krishnaswamy, S.; Xu, A. *PloS one* **2012**, *7*, e48612.
- (75) Cheng, Y.; Liu, C.; Zhang, N.; Wang, S.; Zhang, Z. *BioMed research international* **2014**, *2014*, 179040.
- (76) Urieli-Shoval, S.; Finci-Yeheskel, Z.; Dishon, S.; Galinsky, D.; Linke, R. P.; Ariel, I.; Levin, M.; Ben-Shachar, I.; Prus, D. *The journal of histochemistry and cytochemistry : official journal of the Histochemistry Society* **2010**, *58*, 1015-1023.
- (77) Cubedo, J.; Padro, T.; Badimon, L. *International journal of cardiology* **2013**, *168*, 5196-5204.
- (78) Lech, M.; Rommele, C.; Anders, H. J. *Nephrology, dialysis, transplantation : official publication of the European Dialysis and Transplant Association - European Renal Association* **2013**, *28*, 803-811.
- (79) Li, C.; Zang, T.; Wrobel, K.; Huang, J. T.; Nabi, G. *Analytical and bioanalytical chemistry* **2015**, *407*, 3393-3404.
- (80) Song, P.; Feng, X.; Inagaki, Y.; Song, T.; Zhang, K.; Wang, Z.; Zheng, S.; Ma, K.; Li, Q.; Kong, D.; Wu, Q.; Zhang, T.; Zhao, X.; Hasegawa, K.; Sugawara, Y.; Kokudo, N.; Tang, W.; Japan-China Joint Team for Medical, R.; Cooperation on, H. C. C. *Bioscience trends* **2014**, *8*, 266-273.
- (81) Bourseau-Guilmain, E.; Griveau, A.; Benoit, J. P.; Garcion, E. *PloS one* **2011**, *6*, e25515.
- (82) Hogdall, C.; Fung, E. T.; Christensen, I. J.; Nedergaard, L.; Engelholm, S. A.; Petri, A. L.; Risum, S.; Lundvall, L.; Yip, C.; Pedersen, A. T.; Hartwell, D.; Lomas, L.; Hogdall, E. V. *Gynecologic oncology* **2011**, *123*, 308-313.
- (83) Fleitas, T.; Martinez-Sales, V.; Vila, V.; Reganon, E.; Mesado, D.; Martin, M.; Gomez-Codina, J.; Montalar, J.; Reynes, G. *Clinical & translational oncology : official publication of the Federation of Spanish Oncology Societies and of the National Cancer Institute of Mexico* **2013**, *15*, 897-902.
- (84) Ding, H.; Liu, J.; Xue, R.; Zhao, P.; Qin, Y.; Zheng, F.; Sun, X. *Biomedical reports* **2014**, *2*, 765-769.
- (85) Chen, J.; Chen, L. J.; Xia, Y. L.; Zhou, H. C.; Yang, R. B.; Wu, W.; Lu, Y.; Hu, L. W.; Zhao, Y. *Journal of cancer research and clinical oncology* **2013**, *139*, 1117-1127.
- (86) Carduner, L.; Agniel, R.; Kellouche, S.; Picot, C. R.; Blanc-Fournier, C.; Leroy-Dudal, J.; Carreiras, F. *Biochimica et biophysica acta* **2013**, *1830*, 4885-4897.
- (87) Ahn, H. S.; Shin, Y. S.; Park, P. J.; Kang, K. N.; Kim, Y.; Lee, H. J.; Yang, H. K.; Kim, C. W. *British journal of cancer* **2012**, *106*, 733-739.
- (88) Xue, Y.; Yu, F.; Yan, D.; Cui, F.; Tang, H.; Wang, X.; Chen, J.; Lu, H.; Zhao, S.; Peng, Z. *International journal of molecular sciences* **2015**, *16*, 691-703.
- (89) Katafigiotis, I.; Tyrizis, S. I.; Stravodimos, K. G.; Alamanis, C.; Pavlakis, K.; Vlahou, A.; Makridakis, M.; Katafigioti, A.; Garbis, S. D.; Constantinides, C. A. *BJU international* **2012**, *110*, E688-693.
- (90) Lim, S. C.; Liying, D. Q.; Toy, W. C.; Wong, M.; Yeoh, L. Y.; Tan, C.; Lau, D.; Tan, C.; Subramaniam, T.; Sum, C. F. *Diabetic medicine : a journal of the British Diabetic Association* **2012**, *29*, 945-949.
-
